# Supplementary material
Source: publisher figshare collection journal article supplement (https://acs.figshare.com/ndownloader/files/3623022)
Supplement: Supplementary file 1 [file 3623022]

 
data_jmca034 
  
_audit_creation_method            SHELXL-2014 
_chemical_name_systematic 
; 
 ? 
; 
_chemical_name_common             ? 
_chemical_melting_point           ? 
_chemical_formula_moiety          ? 
_chemical_formula_sum 
 'C45 H62 F3 O5 P Pd S' 
_chemical_formula_weight          909.37 
  
loop_ 
 _atom_type_symbol 
 _atom_type_description 
 _atom_type_scat_dispersion_real 
 _atom_type_scat_dispersion_imag 
 _atom_type_scat_source 
 'C'  'C'   0.0033   0.0016 
 'International Tables Vol C Tables 4.2.6.8 and 6.1.1.4' 
 'H'  'H'   0.0000   0.0000 
 'International Tables Vol C Tables 4.2.6.8 and 6.1.1.4' 
 'O'  'O'   0.0106   0.0060 
 'International Tables Vol C Tables 4.2.6.8 and 6.1.1.4' 
 'F'  'F'   0.0171   0.0103 
 'International Tables Vol C Tables 4.2.6.8 and 6.1.1.4' 
 'P'  'P'   0.1023   0.0942 
 'International Tables Vol C Tables 4.2.6.8 and 6.1.1.4' 
 'S'  'S'   0.1246   0.1234 
 'International Tables Vol C Tables 4.2.6.8 and 6.1.1.4' 
 'Pd'  'Pd'  -0.9988   1.0072 
 'International Tables Vol C Tables 4.2.6.8 and 6.1.1.4' 
  
_space_group_crystal_system       triclinic 
_space_group_IT_number            2 
_space_group_name_H-M_alt         'P -1' 
_space_group_name_Hall            '-P 1' 
  
_shelx_space_group_comment 
; 
The symmetry employed for this shelxl refinement is uniquely defined 
by the following loop, which should always be used as a source of 
symmetry information in preference to the above space-group names. 
They are only intended as comments. 
; 
  
loop_ 
 _space_group_symop_operation_xyz 
 'x, y, z' 
 '-x, -y, -z' 
  
_cell_length_a                    9.3764(7) 
_cell_length_b                    14.5912(11) 
_cell_length_c                    16.0093(12) 
_cell_angle_alpha                 84.4469(17) 
_cell_angle_beta                  85.6663(18) 
_cell_angle_gamma                 87.7373(18) 
_cell_volume                      2172.6(3) 
_cell_formula_units_Z             2 
_cell_measurement_temperature     200(2) 
_cell_measurement_reflns_used     7814 
_cell_measurement_theta_min       2.18 
_cell_measurement_theta_max       20.64 
  
_exptl_crystal_description        block 
_exptl_crystal_colour             yellow 
_exptl_crystal_density_meas       ? 
_exptl_crystal_density_method     ? 
_exptl_crystal_density_diffrn     1.390 
_exptl_crystal_F_000              952 
_exptl_transmission_factor_min    ? 
_exptl_transmission_factor_max    ? 
_exptl_crystal_size_max           0.339 
_exptl_crystal_size_mid           0.206 
_exptl_crystal_size_min           0.144 
_exptl_absorpt_coefficient_mu     0.568 
_shelx_estimated_absorpt_T_min    0.831 
_shelx_estimated_absorpt_T_max    0.923 
_exptl_absorpt_correction_type    multi-scan 
_exptl_absorpt_correction_T_min   0.6781   
_exptl_absorpt_correction_T_max   0.7456 
_exptl_absorpt_process_details    'APEX2 (Bruker, 2007)' 
  
_exptl_special_details 
; 
Data collection is performed with four batch runs at 
\f = 0.00 \% (600 frames), at \f = 90.00 \% 
(600 frames), at \f = 180 \% (600 frames) and 
at \f = 270 \% (600 frames). 
Frame width = 0.30 \& in \w. 
; 
  
_diffrn_ambient_temperature       200(2) 
_diffrn_radiation_wavelength      0.71073 
_diffrn_radiation_type            MoK\a 
_diffrn_source                    ? 
_diffrn_measurement_device_type   'Bruker AXS APEX diffractometer' 
_diffrn_measurement_method        '\f and \w scans' 
_diffrn_detector_area_resol_mean  8.33 
_diffrn_reflns_number             58604 
_diffrn_reflns_av_unetI/netI      0.0475 
_diffrn_reflns_av_R_equivalents   0.0656 
_diffrn_reflns_limit_h_min        -12 
_diffrn_reflns_limit_h_max        12 
_diffrn_reflns_limit_k_min        -18 
_diffrn_reflns_limit_k_max        18 
_diffrn_reflns_limit_l_min        -20 
_diffrn_reflns_limit_l_max        20 
_diffrn_reflns_theta_min          1.403 
_diffrn_reflns_theta_max          27.468 
_diffrn_reflns_theta_full         25.242 
_diffrn_measured_fraction_theta_max   0.998 
_diffrn_measured_fraction_theta_full  1.000 
_diffrn_reflns_Laue_measured_fraction_max    0.998 
_diffrn_reflns_Laue_measured_fraction_full   1.000 
_diffrn_reflns_point_group_measured_fraction_max   0.998 
_diffrn_reflns_point_group_measured_fraction_full  1.000 
_reflns_number_total              9924 
_reflns_number_gt                 8081 
_reflns_threshold_expression      'I > 2\s(I)' 
_reflns_Friedel_coverage          0.000 
_reflns_Friedel_fraction_max      . 
_reflns_Friedel_fraction_full     . 
  
_reflns_special_details 
; 
 Reflections were merged by SHELXL according to the crystal 
 class for the calculation of statistics and refinement. 
  
 _reflns_Friedel_fraction is defined as the number of unique 
 Friedel pairs measured divided by the number that would be 
 possible theoretically, ignoring centric projections and 
 systematic absences. 
; 
  
_computing_data_collection        'Bruker APEX2' 
_computing_cell_refinement        'Bruker SAINT' 
_computing_data_reduction         'Bruker SAINT' 
_computing_structure_solution     'SHELXS-97 (Sheldrick 2008)' 
_computing_structure_refinement   'SHELXL-2014 (Sheldrick, 2014)' 
_computing_molecular_graphics     'Bruker SHELXTL' 
_computing_publication_material   'Bruker SHELXTL' 
  
_refine_special_details 
; 
 ? 
; 
_refine_ls_structure_factor_coef  Fsqd 
_refine_ls_matrix_type            full 
_refine_ls_weighting_scheme       calc 
_refine_ls_weighting_details 
'w=1/[\s^2^(Fo^2^)+(0.0370P)^2^+1.6075P] where P=(Fo^2^+2Fc^2^)/3' 
_atom_sites_solution_primary      ? 
_atom_sites_solution_secondary    ? 
_atom_sites_solution_hydrogens    geom 
_refine_ls_hydrogen_treatment     constr 
_refine_ls_extinction_method      none 
_refine_ls_extinction_coef        . 
_refine_ls_number_reflns          9924 
_refine_ls_number_parameters      520 
_refine_ls_number_restraints      190 
_refine_ls_R_factor_all           0.0536 
_refine_ls_R_factor_gt            0.0387 
_refine_ls_wR_factor_ref          0.0940 
_refine_ls_wR_factor_gt           0.0849 
_refine_ls_goodness_of_fit_ref    1.012 
_refine_ls_restrained_S_all       1.024 
_refine_ls_shift/su_max           0.001 
_refine_ls_shift/su_mean          0.000 
  
loop_ 
 _atom_site_label 
 _atom_site_type_symbol 
 _atom_site_fract_x 
 _atom_site_fract_y 
 _atom_site_fract_z 
 _atom_site_U_iso_or_equiv 
 _atom_site_adp_type 
 _atom_site_occupancy 
 _atom_site_site_symmetry_order 
 _atom_site_calc_flag 
 _atom_site_refinement_flags_posn 
 _atom_site_refinement_flags_adp 
 _atom_site_refinement_flags_occupancy 
 _atom_site_disorder_assembly 
 _atom_site_disorder_group 
Pd1 Pd -0.30367(2) 0.23720(2) -0.18246(2) 0.02489(7) Uani 1 1 d . . . . . 
P1 P -0.42303(7) 0.37015(4) -0.23238(4) 0.02284(14) Uani 1 1 d . . . . . 
O1 O -0.3970(2) 0.15105(14) -0.46097(12) 0.0447(5) Uani 1 1 d . . . . . 
O2 O -0.6094(2) 0.48287(13) -0.35778(12) 0.0382(5) Uani 1 1 d . . . . . 
C1 C -0.1843(3) 0.17990(18) -0.33318(16) 0.0284(6) Uani 1 1 d . . . . . 
C2 C -0.1157(3) 0.09384(18) -0.32565(17) 0.0312(6) Uani 1 1 d . . . . . 
H2 H -0.0154 0.0894 -0.3393 0.037 Uiso 1 1 calc R U . . . 
C3 C -0.1882(3) 0.01391(17) -0.29883(16) 0.0285(6) Uani 1 1 d . . . . . 
C4 C -0.3298(3) 0.02348(17) -0.26683(16) 0.0292(6) Uani 1 1 d . . . . . 
H4 H -0.3767 -0.0293 -0.2401 0.035 Uiso 1 1 calc R U . . . 
C5 C -0.4045(3) 0.10729(17) -0.27270(16) 0.0268(5) Uani 1 1 d . . . . . 
C6 C -0.3347(3) 0.18812(16) -0.31097(15) 0.0242(5) Uani 1 1 d . . . . . 
C7 C -0.1033(3) 0.2621(2) -0.37531(19) 0.0399(7) Uani 1 1 d . . . . . 
H7 H -0.1693 0.3174 -0.3727 0.048 Uiso 1 1 calc R U . . . 
C8 C -0.0629(5) 0.2513(3) -0.4680(2) 0.0763(13) Uani 1 1 d . . . . . 
H8A H 0.0068 0.1999 -0.4728 0.114 Uiso 1 1 calc R U . . . 
H8B H -0.0208 0.3082 -0.4948 0.114 Uiso 1 1 calc R U . . . 
H8C H -0.1487 0.2389 -0.4958 0.114 Uiso 1 1 calc R U . . . 
C9 C 0.0276(4) 0.2803(2) -0.3287(3) 0.0606(10) Uani 1 1 d . . . . . 
H9A H -0.0017 0.2863 -0.2694 0.091 Uiso 1 1 calc R U . . . 
H9B H 0.0710 0.3374 -0.3540 0.091 Uiso 1 1 calc R U . . . 
H9C H 0.0974 0.2289 -0.3329 0.091 Uiso 1 1 calc R U . . . 
C10 C -0.1248(3) -0.08213(18) -0.30993(18) 0.0340(6) Uani 1 1 d . . . . . 
H10 H -0.1402 -0.1208 -0.2552 0.041 Uiso 1 1 calc R U . . . 
C11 C -0.2062(3) -0.1241(2) -0.3757(2) 0.0433(7) Uani 1 1 d . . . . . 
H11A H -0.3074 -0.1285 -0.3559 0.065 Uiso 1 1 calc R U . . . 
H11B H -0.1658 -0.1857 -0.3842 0.065 Uiso 1 1 calc R U . . . 
H11C H -0.1975 -0.0849 -0.4290 0.065 Uiso 1 1 calc R U . . . 
C12 C 0.0337(3) -0.0848(2) -0.3364(2) 0.0515(9) Uani 1 1 d . . . . . 
H12A H 0.0508 -0.0481 -0.3906 0.077 Uiso 1 1 calc R U . . . 
H12B H 0.0665 -0.1487 -0.3419 0.077 Uiso 1 1 calc R U . . . 
H12C H 0.0864 -0.0594 -0.2939 0.077 Uiso 1 1 calc R U . . . 
C13 C -0.5645(3) 0.11046(18) -0.24774(18) 0.0334(6) Uani 1 1 d . . . . . 
H13 H -0.5994 0.1761 -0.2567 0.040 Uiso 1 1 calc R U . . . 
C14 C -0.6459(3) 0.0543(2) -0.3034(2) 0.0500(8) Uani 1 1 d . . . . . 
H14A H -0.6245 0.0764 -0.3626 0.075 Uiso 1 1 calc R U . . . 
H14B H -0.7490 0.0615 -0.2890 0.075 Uiso 1 1 calc R U . . . 
H14C H -0.6165 -0.0109 -0.2941 0.075 Uiso 1 1 calc R U . . . 
C15 C -0.5960(3) 0.0780(2) -0.1546(2) 0.0458(8) Uani 1 1 d . . . . . 
H15A H -0.6988 0.0856 -0.1396 0.069 Uiso 1 1 calc R U . . . 
H15B H -0.5428 0.1148 -0.1202 0.069 Uiso 1 1 calc R U . . . 
H15C H -0.5667 0.0129 -0.1444 0.069 Uiso 1 1 calc R U . . . 
C16 C -0.4240(3) 0.25882(17) -0.36095(15) 0.0260(5) Uani 1 1 d . . . . . 
C17 C -0.4583(3) 0.23315(19) -0.43970(17) 0.0332(6) Uani 1 1 d . . . . . 
C18 C -0.5488(3) 0.2882(2) -0.48808(18) 0.0394(7) Uani 1 1 d . . . . . 
H18 H -0.5746 0.2695 -0.5400 0.047 Uiso 1 1 calc R U . . . 
C19 C -0.6026(3) 0.3715(2) -0.46096(17) 0.0360(6) Uani 1 1 d . . . . . 
H19 H -0.6657 0.4091 -0.4944 0.043 Uiso 1 1 calc R U . . . 
C20 C -0.5655(3) 0.39989(17) -0.38619(16) 0.0285(6) Uani 1 1 d . . . . . 
C21 C -0.4757(3) 0.34292(17) -0.33465(15) 0.0250(5) Uani 1 1 d . . . . . 
C22 C -0.4188(5) 0.1234(3) -0.5414(2) 0.0662(11) Uani 1 1 d . . . . . 
H22A H -0.5206 0.1126 -0.5450 0.099 Uiso 1 1 calc R U . . . 
H22B H -0.3629 0.0664 -0.5500 0.099 Uiso 1 1 calc R U . . . 
H22C H -0.3879 0.1719 -0.5849 0.099 Uiso 1 1 calc R U . . . 
C23 C -0.7074(3) 0.5392(2) -0.40550(19) 0.0427(7) Uani 1 1 d . . . . . 
H23A H -0.6628 0.5566 -0.4618 0.064 Uiso 1 1 calc R U . . . 
H23B H -0.7332 0.5948 -0.3773 0.064 Uiso 1 1 calc R U . . . 
H23C H -0.7938 0.5049 -0.4102 0.064 Uiso 1 1 calc R U . . . 
C24 C -0.2584(4) 0.5023(2) -0.33833(18) 0.0460(8) Uani 1 1 d . . . . . 
H24A H -0.3317 0.5013 -0.3796 0.055 Uiso 1 1 calc R U . . . 
H24B H -0.1834 0.4548 -0.3506 0.055 Uiso 1 1 calc R U . . . 
C25 C -0.1919(4) 0.5975(2) -0.3468(2) 0.0547(9) Uani 1 1 d . . . . . 
H25A H -0.1476 0.6106 -0.4046 0.066 Uiso 1 1 calc R U . . . 
H25B H -0.2680 0.6451 -0.3374 0.066 Uiso 1 1 calc R U . . . 
C26 C -0.0798(4) 0.6023(2) -0.2843(2) 0.0486(8) Uani 1 1 d . . . . . 
H26A H -0.0423 0.6652 -0.2893 0.058 Uiso 1 1 calc R U . . . 
H26B H 0.0008 0.5587 -0.2969 0.058 Uiso 1 1 calc R U . . . 
C27 C -0.1440(4) 0.5782(2) -0.1953(2) 0.0472(8) Uani 1 1 d . . . . . 
H27A H -0.2162 0.6264 -0.1804 0.057 Uiso 1 1 calc R U . . . 
H27B H -0.0678 0.5768 -0.1556 0.057 Uiso 1 1 calc R U . . . 
C28 C -0.2143(3) 0.4848(2) -0.18644(18) 0.0367(6) Uani 1 1 d . . . . . 
H28A H -0.1399 0.4358 -0.1949 0.044 Uiso 1 1 calc R U . . . 
H28B H -0.2599 0.4731 -0.1288 0.044 Uiso 1 1 calc R U . . . 
C29 C -0.3267(3) 0.48054(17) -0.24985(16) 0.0271(5) Uani 1 1 d . . . . . 
H29 H -0.3993 0.5310 -0.2396 0.033 Uiso 1 1 calc R U . . . 
C30 C -0.5756(3) 0.4431(2) -0.09201(18) 0.0406(7) Uani 1 1 d . . . . . 
H30A H -0.5286 0.3968 -0.0529 0.049 Uiso 1 1 calc R U . . . 
H30B H -0.5136 0.4970 -0.1028 0.049 Uiso 1 1 calc R U . . . 
C31 C -0.7200(3) 0.4728(2) -0.0519(2) 0.0485(8) Uani 1 1 d . . . . . 
H31A H -0.7060 0.4973 0.0023 0.058 Uiso 1 1 calc R U . . . 
H31B H -0.7628 0.5229 -0.0891 0.058 Uiso 1 1 calc R U . . . 
C32 C -0.8213(4) 0.3944(2) -0.0369(2) 0.0497(8) Uani 1 1 d . . . . . 
H32A H -0.7841 0.3470 0.0053 0.060 Uiso 1 1 calc R U . . . 
H32B H -0.9157 0.4173 -0.0141 0.060 Uiso 1 1 calc R U . . . 
C33 C -0.8382(4) 0.3520(3) -0.1172(3) 0.0636(11) Uani 1 1 d . . . . . 
H33A H -0.8876 0.3971 -0.1563 0.076 Uiso 1 1 calc R U . . . 
H33B H -0.8989 0.2977 -0.1050 0.076 Uiso 1 1 calc R U . . . 
C34 C -0.6944(3) 0.3224(2) -0.1598(2) 0.0495(9) Uani 1 1 d . . . . . 
H34A H -0.6503 0.2715 -0.1239 0.059 Uiso 1 1 calc R U . . . 
H34B H -0.7102 0.2992 -0.2144 0.059 Uiso 1 1 calc R U . . . 
C35 C -0.5935(3) 0.40233(17) -0.17431(15) 0.0251(5) Uani 1 1 d . . . . . 
H35 H -0.6416 0.4513 -0.2114 0.030 Uiso 1 1 calc R U . . . 
C36 C -0.2638(4) 0.2796(2) -0.06385(17) 0.0400(7) Uani 1 1 d D U . . . 
H36A H -0.1733 0.3117 -0.0615 0.048 Uiso 1 1 calc R U . A 1 
H36B H -0.3461 0.3086 -0.0327 0.048 Uiso 1 1 calc R U . A 1 
C37 C -0.2540(6) 0.1838(3) -0.0536(3) 0.0353(10) Uani 0.703(5) 1 d D U P B 1 
H37 H -0.3274 0.1489 -0.0161 0.042 Uiso 0.703(5) 1 calc R U P B 1 
C38 C -0.1522(5) 0.1365(3) -0.1012(2) 0.0333(8) Uani 0.703(5) 1 d . U P B 1 
H38 H -0.0558 0.1632 -0.1001 0.040 Uiso 0.703(5) 1 calc R U P B 1 
C37' C -0.1856(14) 0.1945(7) -0.0724(7) 0.0353(10) Uani 0.297(5) 1 d D U P B 2 
H37A H -0.0788 0.1957 -0.0788 0.042 Uiso 0.297(5) 1 calc R U P B 2 
C38' C -0.2486(11) 0.1132(7) -0.0778(6) 0.0333(8) Uani 0.297(5) 1 d . U P B 2 
H38A H -0.3277 0.0978 -0.0338 0.040 Uiso 0.297(5) 1 calc R U P B 2 
C39 C -0.2420(4) -0.0327(3) -0.0687(2) 0.0610(10) Uani 1 1 d . . . . . 
H39 H -0.3380 -0.0137 -0.0543 0.073 Uiso 1 1 calc R U . . . 
C40 C -0.2048(4) -0.1251(3) -0.0636(2) 0.0615(10) Uani 1 1 d . . . . . 
H40 H -0.2751 -0.1694 -0.0460 0.074 Uiso 1 1 calc R U . . . 
C41 C -0.0660(4) -0.1535(2) -0.0838(2) 0.0544(9) Uani 1 1 d . . . . . 
H41 H -0.0399 -0.2172 -0.0801 0.065 Uiso 1 1 calc R U . . . 
C42 C 0.0339(4) -0.0893(3) -0.1091(2) 0.0540(9) Uani 1 1 d . . . . . 
H42 H 0.1305 -0.1082 -0.1222 0.065 Uiso 1 1 calc R U . . . 
C43 C -0.0049(4) 0.0023(2) -0.1157(2) 0.0509(8) Uani 1 1 d . . . . . 
H43 H 0.0653 0.0460 -0.1355 0.061 Uiso 1 1 calc R U . . . 
C44 C -0.1411(4) 0.0331(2) -0.09474(19) 0.0459(8) Uani 1 1 d . U . . . 
C45 C 0.3206(5) 0.7156(3) 0.7987(2) 0.0648(10) Uani 1 1 d . U . . . 
F1 F 0.3460(4) 0.63556(18) 0.76632(18) 0.1111(11) Uani 1 1 d . U . . . 
F2 F 0.2194(2) 0.70247(16) 0.86023(18) 0.0795(7) Uani 1 1 d . U . . . 
F3 F 0.2660(4) 0.7738(2) 0.74030(19) 0.1297(12) Uani 1 1 d . U . . . 
O3 O 0.5228(3) 0.68483(18) 0.89483(18) 0.0706(8) Uani 1 1 d . U . . . 
O4 O 0.5749(4) 0.7701(3) 0.7621(2) 0.1301(16) Uani 1 1 d . U . . . 
O5 O 0.4312(3) 0.84093(19) 0.8699(2) 0.0944(11) Uani 1 1 d . U . . . 
S1 S 0.48228(11) 0.75808(6) 0.83556(7) 0.0615(3) Uani 1 1 d . U . . . 
  
loop_ 
 _atom_site_aniso_label 
 _atom_site_aniso_U_11 
 _atom_site_aniso_U_22 
 _atom_site_aniso_U_33 
 _atom_site_aniso_U_23 
 _atom_site_aniso_U_13 
 _atom_site_aniso_U_12 
Pd1 0.02806(11) 0.02545(10) 0.02147(11) -0.00320(7) -0.00379(7) 0.00137(7) 
P1 0.0259(3) 0.0236(3) 0.0193(3) -0.0033(2) -0.0025(3) 0.0001(3) 
O1 0.0620(14) 0.0432(11) 0.0327(11) -0.0200(9) -0.0122(10) 0.0092(10) 
O2 0.0517(13) 0.0330(10) 0.0301(10) -0.0022(8) -0.0127(9) 0.0115(9) 
C1 0.0283(14) 0.0322(13) 0.0258(13) -0.0073(11) -0.0007(11) -0.0052(11) 
C2 0.0247(13) 0.0358(14) 0.0336(15) -0.0087(12) 0.0007(11) 0.0004(11) 
C3 0.0316(14) 0.0304(13) 0.0246(13) -0.0066(11) -0.0053(11) 0.0041(11) 
C4 0.0338(15) 0.0271(13) 0.0265(13) -0.0035(11) 0.0027(11) -0.0029(11) 
C5 0.0278(13) 0.0283(13) 0.0247(13) -0.0068(10) 0.0016(10) -0.0012(10) 
C6 0.0268(13) 0.0254(12) 0.0211(12) -0.0060(10) -0.0020(10) 0.0009(10) 
C7 0.0360(16) 0.0354(15) 0.0467(18) -0.0038(13) 0.0099(13) -0.0041(13) 
C8 0.088(3) 0.083(3) 0.053(2) 0.006(2) 0.026(2) -0.030(2) 
C9 0.043(2) 0.054(2) 0.086(3) -0.010(2) 0.0019(19) -0.0171(16) 
C10 0.0360(15) 0.0309(14) 0.0352(15) -0.0049(12) -0.0037(12) 0.0057(12) 
C11 0.0435(18) 0.0386(16) 0.0503(19) -0.0174(14) -0.0043(15) 0.0014(14) 
C12 0.0357(17) 0.0446(18) 0.077(2) -0.0212(17) -0.0077(16) 0.0089(14) 
C13 0.0308(14) 0.0282(13) 0.0410(16) -0.0073(12) 0.0040(12) -0.0012(11) 
C14 0.0354(17) 0.0519(19) 0.066(2) -0.0175(17) -0.0039(16) -0.0075(15) 
C15 0.0409(17) 0.0430(17) 0.051(2) -0.0046(15) 0.0153(15) -0.0071(14) 
C16 0.0285(13) 0.0277(12) 0.0223(13) -0.0040(10) -0.0020(10) -0.0019(10) 
C17 0.0389(16) 0.0372(15) 0.0250(14) -0.0085(11) -0.0047(12) -0.0030(12) 
C18 0.0478(18) 0.0465(17) 0.0264(15) -0.0078(13) -0.0132(13) -0.0001(14) 
C19 0.0416(16) 0.0403(15) 0.0265(14) 0.0012(12) -0.0116(12) 0.0016(13) 
C20 0.0315(14) 0.0294(13) 0.0241(13) 0.0005(10) -0.0028(11) -0.0006(11) 
C21 0.0263(13) 0.0272(12) 0.0215(12) -0.0018(10) -0.0019(10) -0.0028(10) 
C22 0.092(3) 0.070(2) 0.044(2) -0.0340(19) -0.022(2) 0.014(2) 
C23 0.0478(18) 0.0415(16) 0.0376(17) 0.0013(13) -0.0080(14) 0.0120(14) 
C24 0.063(2) 0.0489(18) 0.0270(15) -0.0011(13) -0.0018(14) -0.0250(16) 
C25 0.071(2) 0.0510(19) 0.0420(19) 0.0097(15) -0.0053(17) -0.0299(18) 
C26 0.0469(19) 0.0479(18) 0.052(2) -0.0026(15) -0.0009(15) -0.0204(15) 
C27 0.0466(19) 0.0510(19) 0.0473(19) -0.0126(15) -0.0058(15) -0.0186(15) 
C28 0.0373(16) 0.0425(16) 0.0313(15) -0.0053(13) -0.0033(12) -0.0095(13) 
C29 0.0277(13) 0.0251(12) 0.0289(14) -0.0034(10) -0.0020(11) -0.0026(10) 
C30 0.0341(16) 0.0590(19) 0.0315(16) -0.0196(14) 0.0016(12) -0.0055(14) 
C31 0.0478(19) 0.059(2) 0.0414(18) -0.0267(16) 0.0107(15) -0.0043(16) 
C32 0.0426(18) 0.0534(19) 0.051(2) -0.0094(16) 0.0180(15) -0.0016(15) 
C33 0.0341(18) 0.077(3) 0.085(3) -0.045(2) 0.0171(18) -0.0173(17) 
C34 0.0362(17) 0.0493(18) 0.066(2) -0.0308(17) 0.0154(15) -0.0112(14) 
C35 0.0268(13) 0.0257(12) 0.0232(13) -0.0036(10) -0.0027(10) 0.0024(10) 
C36 0.0537(19) 0.0413(15) 0.0269(14) -0.0080(12) -0.0159(13) 0.0124(14) 
C37 0.045(3) 0.0404(18) 0.020(2) -0.0001(15) -0.008(2) 0.0070(19) 
C38 0.034(2) 0.0388(18) 0.0281(19) -0.0052(15) -0.0111(16) 0.0051(15) 
C37' 0.045(3) 0.0404(18) 0.020(2) -0.0001(15) -0.008(2) 0.0070(19) 
C38' 0.034(2) 0.0388(18) 0.0281(19) -0.0052(15) -0.0111(16) 0.0051(15) 
C39 0.047(2) 0.090(3) 0.0404(19) 0.0083(19) -0.0008(16) 0.024(2) 
C40 0.068(3) 0.063(2) 0.051(2) 0.0192(18) -0.0124(19) -0.018(2) 
C41 0.082(3) 0.0368(17) 0.0442(19) -0.0028(15) -0.0140(18) 0.0118(18) 
C42 0.047(2) 0.067(2) 0.046(2) 0.0002(17) -0.0104(16) 0.0189(18) 
C43 0.050(2) 0.0509(19) 0.054(2) 0.0050(16) -0.0226(16) -0.0088(16) 
C44 0.068(2) 0.0403(16) 0.0303(16) -0.0042(13) -0.0191(15) 0.0156(15) 
C45 0.092(3) 0.0503(19) 0.051(2) -0.0064(16) -0.0142(19) 0.0313(19) 
F1 0.167(3) 0.0840(17) 0.093(2) -0.0507(15) -0.0516(19) 0.0473(18) 
F2 0.0592(14) 0.0710(15) 0.110(2) -0.0161(14) -0.0076(13) -0.0009(12) 
F3 0.172(3) 0.121(2) 0.093(2) 0.0172(18) -0.057(2) 0.064(2) 
O3 0.0586(16) 0.0712(17) 0.0782(19) 0.0161(14) -0.0113(14) 0.0012(13) 
O4 0.123(3) 0.118(3) 0.123(3) 0.042(2) 0.080(2) 0.024(2) 
O5 0.091(2) 0.0501(15) 0.141(3) -0.0227(17) 0.015(2) -0.0084(15) 
S1 0.0587(6) 0.0481(5) 0.0703(6) 0.0101(5) 0.0218(5) 0.0030(4) 
  
_geom_special_details 
; 
 All esds (except the esd in the dihedral angle between two l.s. planes) 
 are estimated using the full covariance matrix.  The cell esds are taken 
 into account individually in the estimation of esds in distances, angles 
 and torsion angles; correlations between esds in cell parameters are only 
 used when they are defined by crystal symmetry.  An approximate (isotropic) 
 treatment of cell esds is used for estimating esds involving l.s. planes. 
; 
  
loop_ 
 _geom_bond_atom_site_label_1 
 _geom_bond_atom_site_label_2 
 _geom_bond_distance 
 _geom_bond_site_symmetry_2 
 _geom_bond_publ_flag 
Pd1 C36 2.117(3) . ? 
Pd1 C37' 2.179(11) . ? 
Pd1 C37 2.210(4) . ? 
Pd1 C6 2.285(2) . ? 
Pd1 P1 2.3061(7) . ? 
Pd1 C38 2.368(4) . ? 
Pd1 C38' 2.412(9) . ? 
P1 C21 1.829(3) . ? 
P1 C35 1.855(3) . ? 
P1 C29 1.865(2) . ? 
O1 C17 1.370(3) . ? 
O1 C22 1.418(4) . ? 
O2 C20 1.372(3) . ? 
O2 C23 1.425(3) . ? 
C1 C2 1.387(4) . ? 
C1 C6 1.431(3) . ? 
C1 C7 1.519(4) . ? 
C2 C3 1.389(4) . ? 
C3 C4 1.394(4) . ? 
C3 C10 1.521(3) . ? 
C4 C5 1.384(3) . ? 
C5 C6 1.434(3) . ? 
C5 C13 1.523(4) . ? 
C6 C16 1.510(3) . ? 
C7 C8 1.524(5) . ? 
C7 C9 1.528(5) . ? 
C10 C12 1.515(4) . ? 
C10 C11 1.533(4) . ? 
C13 C14 1.530(4) . ? 
C13 C15 1.530(4) . ? 
C16 C21 1.393(3) . ? 
C16 C17 1.413(3) . ? 
C17 C18 1.375(4) . ? 
C18 C19 1.393(4) . ? 
C19 C20 1.377(4) . ? 
C20 C21 1.413(3) . ? 
C24 C29 1.520(4) . ? 
C24 C25 1.534(4) . ? 
C25 C26 1.513(5) . ? 
C26 C27 1.518(4) . ? 
C27 C28 1.527(4) . ? 
C28 C29 1.525(4) . ? 
C30 C31 1.519(4) . ? 
C30 C35 1.520(4) . ? 
C31 C32 1.506(4) . ? 
C32 C33 1.502(5) . ? 
C33 C34 1.530(4) . ? 
C34 C35 1.521(4) . ? 
C36 C37 1.392(5) . ? 
C36 C37' 1.429(10) . ? 
C37 C38 1.381(6) . ? 
C38 C44 1.503(5) . ? 
C37' C38' 1.359(16) . ? 
C38' C44 1.543(10) . ? 
C39 C40 1.376(5) . ? 
C39 C44 1.387(5) . ? 
C40 C41 1.375(5) . ? 
C41 C42 1.362(5) . ? 
C42 C43 1.369(5) . ? 
C43 C44 1.366(5) . ? 
C45 F3 1.320(4) . ? 
C45 F2 1.320(5) . ? 
C45 F1 1.328(4) . ? 
C45 S1 1.820(5) . ? 
O3 S1 1.419(3) . ? 
O4 S1 1.409(3) . ? 
O5 S1 1.427(3) . ? 
  
loop_ 
 _geom_angle_atom_site_label_1 
 _geom_angle_atom_site_label_2 
 _geom_angle_atom_site_label_3 
 _geom_angle 
 _geom_angle_site_symmetry_1 
 _geom_angle_site_symmetry_3 
 _geom_angle_publ_flag 
C36 Pd1 C37' 38.8(3) . . ? 
C36 Pd1 C37 37.46(13) . . ? 
C36 Pd1 C6 176.96(10) . . ? 
C37' Pd1 C6 138.6(3) . . ? 
C37 Pd1 C6 141.10(13) . . ? 
C36 Pd1 P1 97.17(8) . . ? 
C37' Pd1 P1 135.4(3) . . ? 
C37 Pd1 P1 131.34(12) . . ? 
C6 Pd1 P1 85.10(6) . . ? 
C36 Pd1 C38 64.57(12) . . ? 
C37 Pd1 C38 34.89(16) . . ? 
C6 Pd1 C38 112.90(11) . . ? 
P1 Pd1 C38 160.30(10) . . ? 
C36 Pd1 C38' 65.3(2) . . ? 
C37' Pd1 C38' 34.0(4) . . ? 
C6 Pd1 C38' 113.2(2) . . ? 
P1 Pd1 C38' 154.6(2) . . ? 
C21 P1 C35 104.50(11) . . ? 
C21 P1 C29 107.39(11) . . ? 
C35 P1 C29 103.42(11) . . ? 
C21 P1 Pd1 103.18(8) . . ? 
C35 P1 Pd1 117.42(8) . . ? 
C29 P1 Pd1 119.65(9) . . ? 
C17 O1 C22 118.2(2) . . ? 
C20 O2 C23 117.7(2) . . ? 
C2 C1 C6 119.5(2) . . ? 
C2 C1 C7 119.4(2) . . ? 
C6 C1 C7 120.5(2) . . ? 
C1 C2 C3 122.4(2) . . ? 
C2 C3 C4 117.6(2) . . ? 
C2 C3 C10 123.1(2) . . ? 
C4 C3 C10 119.1(2) . . ? 
C5 C4 C3 122.1(2) . . ? 
C4 C5 C6 119.8(2) . . ? 
C4 C5 C13 119.3(2) . . ? 
C6 C5 C13 120.5(2) . . ? 
C1 C6 C5 117.4(2) . . ? 
C1 C6 C16 119.0(2) . . ? 
C5 C6 C16 117.3(2) . . ? 
C1 C6 Pd1 93.61(16) . . ? 
C5 C6 Pd1 91.52(15) . . ? 
C16 C6 Pd1 109.65(15) . . ? 
C1 C7 C8 111.4(3) . . ? 
C1 C7 C9 111.8(3) . . ? 
C8 C7 C9 111.5(3) . . ? 
C12 C10 C3 114.3(2) . . ? 
C12 C10 C11 109.2(2) . . ? 
C3 C10 C11 108.4(2) . . ? 
C5 C13 C14 111.2(2) . . ? 
C5 C13 C15 111.5(2) . . ? 
C14 C13 C15 110.9(2) . . ? 
C21 C16 C17 119.6(2) . . ? 
C21 C16 C6 125.6(2) . . ? 
C17 C16 C6 114.8(2) . . ? 
O1 C17 C18 124.8(2) . . ? 
O1 C17 C16 114.8(2) . . ? 
C18 C17 C16 120.3(2) . . ? 
C17 C18 C19 119.9(3) . . ? 
C20 C19 C18 120.7(3) . . ? 
O2 C20 C19 123.6(2) . . ? 
O2 C20 C21 116.3(2) . . ? 
C19 C20 C21 120.0(2) . . ? 
C16 C21 C20 119.3(2) . . ? 
C16 C21 P1 116.07(18) . . ? 
C20 C21 P1 124.62(19) . . ? 
C29 C24 C25 110.3(2) . . ? 
C26 C25 C24 111.4(3) . . ? 
C25 C26 C27 110.3(3) . . ? 
C26 C27 C28 111.5(3) . . ? 
C29 C28 C27 111.9(2) . . ? 
C24 C29 C28 109.4(2) . . ? 
C24 C29 P1 115.03(18) . . ? 
C28 C29 P1 111.48(18) . . ? 
C31 C30 C35 110.6(2) . . ? 
C32 C31 C30 112.1(3) . . ? 
C33 C32 C31 110.6(3) . . ? 
C32 C33 C34 112.3(3) . . ? 
C35 C34 C33 111.0(3) . . ? 
C30 C35 C34 110.3(2) . . ? 
C30 C35 P1 114.46(18) . . ? 
C34 C35 P1 111.81(18) . . ? 
C37 C36 Pd1 74.9(2) . . ? 
C37' C36 Pd1 72.9(5) . . ? 
C38 C37 C36 120.3(4) . . ? 
C38 C37 Pd1 78.8(3) . . ? 
C36 C37 Pd1 67.6(2) . . ? 
C37 C38 C44 122.2(4) . . ? 
C37 C38 Pd1 66.3(2) . . ? 
C44 C38 Pd1 128.7(3) . . ? 
C38' C37' C36 123.6(10) . . ? 
C38' C37' Pd1 82.5(7) . . ? 
C36 C37' Pd1 68.2(4) . . ? 
C37' C38' C44 113.7(9) . . ? 
C37' C38' Pd1 63.6(6) . . ? 
C44 C38' Pd1 123.6(6) . . ? 
C40 C39 C44 120.9(3) . . ? 
C41 C40 C39 120.1(3) . . ? 
C42 C41 C40 119.4(3) . . ? 
C41 C42 C43 120.0(3) . . ? 
C44 C43 C42 122.2(3) . . ? 
C43 C44 C39 117.4(3) . . ? 
C43 C44 C38 111.4(3) . . ? 
C39 C44 C38 131.2(3) . . ? 
C43 C44 C38' 149.9(5) . . ? 
C39 C44 C38' 92.4(5) . . ? 
F3 C45 F2 106.6(3) . . ? 
F3 C45 F1 107.7(3) . . ? 
F2 C45 F1 107.2(4) . . ? 
F3 C45 S1 112.0(3) . . ? 
F2 C45 S1 111.8(3) . . ? 
F1 C45 S1 111.3(3) . . ? 
O4 S1 O3 114.9(2) . . ? 
O4 S1 O5 115.4(2) . . ? 
O3 S1 O5 115.7(2) . . ? 
O4 S1 C45 103.7(3) . . ? 
O3 S1 C45 102.06(17) . . ? 
O5 S1 C45 102.28(19) . . ? 
  
_refine_diff_density_max    0.691 
_refine_diff_density_min   -0.725 
_refine_diff_density_rms    0.072 
  
_shelxl_version_number 2014-3 
  
_shelx_res_file 
; 
TITL jmca034 in P-1 
CELL 0.71073   9.37640  14.59120  16.00930  84.4469  85.6663  87.7373 
ZERR    2.00   0.00070   0.00110   0.00120   0.0017   0.0018   0.0018 
LATT 1 
SFAC C  H  O  F  P  S  Pd 
UNIT 90  124  10  6  2  2  2 
L.S. 10 
ACTA 
BOND 
FMAP 2 
PLAN 20 
SIZE 0.144 0.206 0.339 
SIMU C45 F1 F2 F3 S1 O3 O4 O5 
RIGU C45 F1 F2 F3 S1 O3 O4 O5 
TEMP -73.150 
EADP C37 C37' 
EADP C38 C38' 
SADI C44 C38 C44 C38 
SADI C36 C37 C36 C37' 
SADI C37 C38 C38' C38' 
SIMU C36 C37 C38 C44 C37' C38' 
RIGU C36 C37 C38 C44 C37' C38' 
OMIT  1 1 0 
WGHT    0.037000    1.607500 
FVAR       0.13394   0.70272 
PD1   7   -0.303669    0.237200   -0.182462    11.00000    0.02806    0.02545 = 
         0.02147   -0.00320   -0.00379    0.00137 
P1    5   -0.423028    0.370149   -0.232376    11.00000    0.02590    0.02364 = 
         0.01930   -0.00335   -0.00248    0.00014 
O1    3   -0.397037    0.151046   -0.460965    11.00000    0.06196    0.04321 = 
         0.03268   -0.02002   -0.01217    0.00920 
O2    3   -0.609358    0.482871   -0.357777    11.00000    0.05172    0.03305 = 
         0.03012   -0.00222   -0.01273    0.01146 
C1    1   -0.184258    0.179900   -0.333176    11.00000    0.02828    0.03215 = 
         0.02577   -0.00725   -0.00073   -0.00522 
C2    1   -0.115674    0.093836   -0.325649    11.00000    0.02473    0.03583 = 
         0.03358   -0.00873    0.00071    0.00039 
AFIX  43 
H2    2   -0.015429    0.089408   -0.339341    11.00000   -1.20000 
AFIX   0 
C3    1   -0.188177    0.013906   -0.298830    11.00000    0.03156    0.03038 = 
         0.02456   -0.00664   -0.00531    0.00406 
C4    1   -0.329828    0.023477   -0.266832    11.00000    0.03377    0.02705 = 
         0.02648   -0.00352    0.00273   -0.00295 
AFIX  43 
H4    2   -0.376657   -0.029265   -0.240121    11.00000   -1.20000 
AFIX   0 
C5    1   -0.404478    0.107289   -0.272698    11.00000    0.02780    0.02834 = 
         0.02472   -0.00680    0.00158   -0.00119 
C6    1   -0.334660    0.188116   -0.310968    11.00000    0.02675    0.02543 = 
         0.02108   -0.00601   -0.00199    0.00094 
C7    1   -0.103261    0.262061   -0.375313    11.00000    0.03596    0.03539 = 
         0.04667   -0.00380    0.00994   -0.00406 
AFIX  13 
H7    2   -0.169297    0.317393   -0.372743    11.00000   -1.20000 
AFIX   0 
C8    1   -0.062885    0.251285   -0.467964    11.00000    0.08815    0.08296 = 
         0.05289    0.00562    0.02638   -0.03031 
AFIX 137 
H8A   2    0.006802    0.199879   -0.472787    11.00000   -1.50000 
H8B   2   -0.020804    0.308152   -0.494839    11.00000   -1.50000 
H8C   2   -0.148696    0.238896   -0.495830    11.00000   -1.50000 
AFIX   0 
C9    1    0.027581    0.280282   -0.328731    11.00000    0.04267    0.05393 = 
         0.08628   -0.01028    0.00194   -0.01712 
AFIX 137 
H9A   2   -0.001734    0.286254   -0.269387    11.00000   -1.50000 
H9B   2    0.070976    0.337404   -0.353984    11.00000   -1.50000 
H9C   2    0.097427    0.228875   -0.332941    11.00000   -1.50000 
AFIX   0 
C10   1   -0.124810   -0.082127   -0.309928    11.00000    0.03597    0.03086 = 
         0.03519   -0.00493   -0.00373    0.00566 
AFIX  13 
H10   2   -0.140216   -0.120822   -0.255156    11.00000   -1.20000 
AFIX   0 
C11   1   -0.206229   -0.124112   -0.375683    11.00000    0.04352    0.03855 = 
         0.05033   -0.01735   -0.00434    0.00141 
AFIX 137 
H11A  2   -0.307434   -0.128548   -0.355905    11.00000   -1.50000 
H11B  2   -0.165775   -0.185747   -0.384226    11.00000   -1.50000 
H11C  2   -0.197535   -0.084885   -0.428958    11.00000   -1.50000 
AFIX   0 
C12   1    0.033726   -0.084815   -0.336410    11.00000    0.03575    0.04459 = 
         0.07685   -0.02124   -0.00771    0.00895 
AFIX 137 
H12A  2    0.050810   -0.048131   -0.390589    11.00000   -1.50000 
H12B  2    0.066531   -0.148697   -0.341918    11.00000   -1.50000 
H12C  2    0.086408   -0.059355   -0.293859    11.00000   -1.50000 
AFIX   0 
C13   1   -0.564489    0.110457   -0.247742    11.00000    0.03075    0.02824 = 
         0.04100   -0.00733    0.00399   -0.00122 
AFIX  13 
H13   2   -0.599380    0.176068   -0.256749    11.00000   -1.20000 
AFIX   0 
C14   1   -0.645923    0.054316   -0.303371    11.00000    0.03535    0.05190 = 
         0.06567   -0.01752   -0.00394   -0.00746 
AFIX 137 
H14A  2   -0.624456    0.076359   -0.362603    11.00000   -1.50000 
H14B  2   -0.748964    0.061483   -0.289001    11.00000   -1.50000 
H14C  2   -0.616514   -0.010856   -0.294144    11.00000   -1.50000 
AFIX   0 
C15   1   -0.596006    0.078037   -0.154618    11.00000    0.04092    0.04303 = 
         0.05105   -0.00460    0.01527   -0.00707 
AFIX 137 
H15A  2   -0.698771    0.085579   -0.139552    11.00000   -1.50000 
H15B  2   -0.542752    0.114823   -0.120230    11.00000   -1.50000 
H15C  2   -0.566677    0.012947   -0.144434    11.00000   -1.50000 
AFIX   0 
C16   1   -0.423984    0.258824   -0.360953    11.00000    0.02846    0.02769 = 
         0.02233   -0.00401   -0.00199   -0.00188 
C17   1   -0.458278    0.233155   -0.439704    11.00000    0.03886    0.03719 = 
         0.02504   -0.00849   -0.00474   -0.00298 
C18   1   -0.548795    0.288198   -0.488085    11.00000    0.04776    0.04648 = 
         0.02641   -0.00779   -0.01316   -0.00011 
AFIX  43 
H18   2   -0.574592    0.269458   -0.539959    11.00000   -1.20000 
AFIX   0 
C19   1   -0.602635    0.371473   -0.460958    11.00000    0.04156    0.04029 = 
         0.02649    0.00116   -0.01159    0.00161 
AFIX  43 
H19   2   -0.665668    0.409078   -0.494407    11.00000   -1.20000 
AFIX   0 
C20   1   -0.565501    0.399888   -0.386190    11.00000    0.03147    0.02941 = 
         0.02409    0.00052   -0.00283   -0.00061 
C21   1   -0.475727    0.342925   -0.334650    11.00000    0.02635    0.02719 = 
         0.02153   -0.00175   -0.00191   -0.00277 
C22   1   -0.418791    0.123360   -0.541414    11.00000    0.09174    0.06961 = 
         0.04412   -0.03398   -0.02209    0.01412 
AFIX 137 
H22A  2   -0.520581    0.112630   -0.544967    11.00000   -1.50000 
H22B  2   -0.362885    0.066426   -0.549960    11.00000   -1.50000 
H22C  2   -0.387943    0.171889   -0.584917    11.00000   -1.50000 
AFIX   0 
C23   1   -0.707428    0.539191   -0.405497    11.00000    0.04775    0.04145 = 
         0.03760    0.00129   -0.00796    0.01198 
AFIX 137 
H23A  2   -0.662769    0.556631   -0.461831    11.00000   -1.50000 
H23B  2   -0.733217    0.594819   -0.377275    11.00000   -1.50000 
H23C  2   -0.793762    0.504865   -0.410212    11.00000   -1.50000 
AFIX   0 
C24   1   -0.258360    0.502315   -0.338331    11.00000    0.06317    0.04888 = 
         0.02702   -0.00112   -0.00180   -0.02500 
AFIX  23 
H24A  2   -0.331671    0.501314   -0.379581    11.00000   -1.20000 
H24B  2   -0.183377    0.454834   -0.350634    11.00000   -1.20000 
AFIX   0 
C25   1   -0.191929    0.597453   -0.346805    11.00000    0.07083    0.05096 = 
         0.04198    0.00975   -0.00528   -0.02987 
AFIX  23 
H25A  2   -0.147565    0.610572   -0.404617    11.00000   -1.20000 
H25B  2   -0.268047    0.645080   -0.337353    11.00000   -1.20000 
AFIX   0 
C26   1   -0.079836    0.602275   -0.284276    11.00000    0.04685    0.04785 = 
         0.05171   -0.00257   -0.00086   -0.02036 
AFIX  23 
H26A  2   -0.042273    0.665184   -0.289267    11.00000   -1.20000 
H26B  2    0.000832    0.558738   -0.296868    11.00000   -1.20000 
AFIX   0 
C27   1   -0.143958    0.578181   -0.195287    11.00000    0.04665    0.05101 = 
         0.04728   -0.01255   -0.00575   -0.01863 
AFIX  23 
H27A  2   -0.216185    0.626358   -0.180392    11.00000   -1.20000 
H27B  2   -0.067774    0.576838   -0.155568    11.00000   -1.20000 
AFIX   0 
C28   1   -0.214278    0.484801   -0.186440    11.00000    0.03729    0.04251 = 
         0.03134   -0.00526   -0.00328   -0.00948 
AFIX  23 
H28A  2   -0.139917    0.435823   -0.194853    11.00000   -1.20000 
H28B  2   -0.259873    0.473095   -0.128764    11.00000   -1.20000 
AFIX   0 
C29   1   -0.326685    0.480545   -0.249849    11.00000    0.02767    0.02510 = 
         0.02894   -0.00337   -0.00204   -0.00261 
AFIX  13 
H29   2   -0.399279    0.531033   -0.239575    11.00000   -1.20000 
AFIX   0 
C30   1   -0.575611    0.443132   -0.092010    11.00000    0.03409    0.05896 = 
         0.03149   -0.01959    0.00161   -0.00546 
AFIX  23 
H30A  2   -0.528601    0.396753   -0.052918    11.00000   -1.20000 
H30B  2   -0.513567    0.496976   -0.102773    11.00000   -1.20000 
AFIX   0 
C31   1   -0.719956    0.472783   -0.051940    11.00000    0.04780    0.05859 = 
         0.04139   -0.02669    0.01067   -0.00433 
AFIX  23 
H31A  2   -0.706042    0.497278    0.002315    11.00000   -1.20000 
H31B  2   -0.762803    0.522941   -0.089129    11.00000   -1.20000 
AFIX   0 
C32   1   -0.821313    0.394360   -0.036854    11.00000    0.04263    0.05344 = 
         0.05078   -0.00942    0.01797   -0.00163 
AFIX  23 
H32A  2   -0.784080    0.347032    0.005276    11.00000   -1.20000 
H32B  2   -0.915744    0.417326   -0.014129    11.00000   -1.20000 
AFIX   0 
C33   1   -0.838211    0.352020   -0.117224    11.00000    0.03406    0.07723 = 
         0.08483   -0.04526    0.01712   -0.01727 
AFIX  23 
H33A  2   -0.887591    0.397147   -0.156344    11.00000   -1.20000 
H33B  2   -0.898932    0.297669   -0.105012    11.00000   -1.20000 
AFIX   0 
C34   1   -0.694432    0.322364   -0.159770    11.00000    0.03619    0.04926 = 
         0.06597   -0.03080    0.01543   -0.01119 
AFIX  23 
H34A  2   -0.650276    0.271529   -0.123931    11.00000   -1.20000 
H34B  2   -0.710213    0.299237   -0.214359    11.00000   -1.20000 
AFIX   0 
C35   1   -0.593518    0.402333   -0.174310    11.00000    0.02675    0.02568 = 
         0.02315   -0.00365   -0.00271    0.00238 
AFIX  13 
H35   2   -0.641641    0.451330   -0.211391    11.00000   -1.20000 
AFIX   0 
C36   1   -0.263776    0.279597   -0.063852    11.00000    0.05371    0.04126 = 
         0.02690   -0.00797   -0.01590    0.01244 
AFIX  23 
H36A  2   -0.173339    0.311732   -0.061472    11.00000   -1.20000 
H36B  2   -0.346055    0.308641   -0.032722    11.00000   -1.20000 
AFIX   0 
PART   1 
C37   1   -0.254037    0.183765   -0.053607    21.00000    0.04530    0.04039 = 
         0.01986   -0.00013   -0.00843    0.00699 
AFIX  13 
H37   2   -0.327428    0.148872   -0.016060    21.00000   -1.20000 
AFIX   0 
C38   1   -0.152218    0.136543   -0.101237    21.00000    0.03421    0.03879 = 
         0.02812   -0.00519   -0.01109    0.00510 
AFIX  13 
H38   2   -0.055807    0.163176   -0.100135    21.00000   -1.20000 
AFIX   0 
PART   2 
C37'  1   -0.185628    0.194505   -0.072374   -21.00000    0.04530    0.04039 = 
         0.01986   -0.00013   -0.00843    0.00699 
AFIX  13 
H37A  2   -0.078780    0.195690   -0.078776   -21.00000   -1.20000 
AFIX   0 
C38'  1   -0.248616    0.113175   -0.077779   -21.00000    0.03421    0.03879 = 
         0.02812   -0.00519   -0.01109    0.00510 
AFIX  13 
H38A  2   -0.327722    0.097800   -0.033793   -21.00000   -1.20000 
AFIX   0 
PART   0 
C39   1   -0.241963   -0.032681   -0.068726    11.00000    0.04733    0.08991 = 
         0.04042    0.00827   -0.00085    0.02390 
AFIX  43 
H39   2   -0.337997   -0.013664   -0.054282    11.00000   -1.20000 
AFIX   0 
C40   1   -0.204773   -0.125115   -0.063557    11.00000    0.06777    0.06310 = 
         0.05128    0.01917   -0.01240   -0.01815 
AFIX  43 
H40   2   -0.275134   -0.169408   -0.045989    11.00000   -1.20000 
AFIX   0 
C41   1   -0.065964   -0.153473   -0.083773    11.00000    0.08233    0.03677 = 
         0.04419   -0.00285   -0.01400    0.01175 
AFIX  43 
H41   2   -0.039926   -0.217243   -0.080105    11.00000   -1.20000 
AFIX   0 
C42   1    0.033948   -0.089341   -0.109115    11.00000    0.04710    0.06693 = 
         0.04627    0.00024   -0.01039    0.01888 
AFIX  43 
H42   2    0.130509   -0.108244   -0.122201    11.00000   -1.20000 
AFIX   0 
C43   1   -0.004896    0.002341   -0.115706    11.00000    0.04984    0.05088 = 
         0.05364    0.00502   -0.02260   -0.00880 
AFIX  43 
H43   2    0.065258    0.046047   -0.135530    11.00000   -1.20000 
AFIX   0 
C44   1   -0.141142    0.033084   -0.094736    11.00000    0.06821    0.04034 = 
         0.03033   -0.00425   -0.01905    0.01560 
C45   1    0.320557    0.715570    0.798690    11.00000    0.09204    0.05027 = 
         0.05114   -0.00637   -0.01425    0.03125 
F1    4    0.345997    0.635557    0.766324    11.00000    0.16682    0.08395 = 
         0.09325   -0.05068   -0.05156    0.04728 
F2    4    0.219405    0.702471    0.860233    11.00000    0.05916    0.07100 = 
         0.10990   -0.01608   -0.00758   -0.00088 
F3    4    0.266033    0.773842    0.740299    11.00000    0.17184    0.12092 = 
         0.09267    0.01716   -0.05661    0.06390 
O3    3    0.522773    0.684830    0.894829    11.00000    0.05863    0.07122 = 
         0.07824    0.01610   -0.01132    0.00121 
O4    3    0.574851    0.770113    0.762122    11.00000    0.12270    0.11824 = 
         0.12304    0.04158    0.08010    0.02441 
O5    3    0.431158    0.840932    0.869946    11.00000    0.09128    0.05007 = 
         0.14142   -0.02270    0.01550   -0.00843 
S1    6    0.482276    0.758082    0.835565    11.00000    0.05867    0.04814 = 
         0.07030    0.01015    0.02176    0.00298 
  
HKLF 4 
  
REM  jmca034 in P-1 
REM R1 =  0.0387 for    8081 Fo > 4sig(Fo)  and  0.0536 for all    9924 data 
REM    520 parameters refined using    190 restraints 
  
END 
  
WGHT      0.0310      1.6977 
  
REM Highest difference peak  0.691,  deepest hole -0.725,  1-sigma level  0.072 
Q1    1   0.4638  0.7259  0.7969  11.00000  0.05    0.69 
Q2    1   0.5155  0.7039  0.7340  11.00000  0.05    0.54 
Q3    1   0.4616  0.8353  0.8104  11.00000  0.05    0.46 
Q4    1  -0.0572  0.1792 -0.1316  11.00000  0.05    0.43 
Q5    1  -0.5213  0.3817 -0.1959  11.00000  0.05    0.42 
Q6    1  -0.3460  0.4220 -0.2487  11.00000  0.05    0.40 
Q7    1  -0.1849  0.1001 -0.1292  11.00000  0.05    0.39 
Q8    1  -0.3909  0.2194 -0.3377  11.00000  0.05    0.38 
Q9    1  -0.1587 -0.0395 -0.3066  11.00000  0.05    0.37 
Q10   1  -0.4479  0.2425 -0.3969  11.00000  0.05    0.36 
Q11   1  -0.3744  0.1511 -0.2937  11.00000  0.05    0.36 
Q12   1  -0.2280 -0.0833 -0.0886  11.00000  0.05    0.35 
Q13   1  -0.4789  0.1044 -0.2499  11.00000  0.05    0.34 
Q14   1  -0.1472 -0.1408 -0.1007  11.00000  0.05    0.34 
Q15   1   0.6049  0.7781  0.7831  11.00000  0.05    0.34 
Q16   1   0.4021  0.6804  0.7252  11.00000  0.05    0.33 
Q17   1  -0.4594  0.2950 -0.3504  11.00000  0.05    0.33 
Q18   1  -0.5659  0.3843 -0.0770  11.00000  0.05    0.32 
Q19   1  -0.8524  0.3999 -0.1532  11.00000  0.05    0.31 
Q20   1  -0.8351  0.3782 -0.0815  11.00000  0.05    0.31 
; 
_shelx_res_checksum   89433 
  
_shelx_hkl_file 
; 
  -1   0   0  468.94   14.75 
  -1   0   0  461.11   14.77 
  -1   0   0  460.84   14.77 
  -1   0   0  442.47   14.73 
  -1   0   0  467.29   14.82 
  -1   0   0  451.95   14.79 
   1   0   0  456.51   14.79 
   1   0   0  450.62   14.74 
   1   0   0  463.79   14.77 
   1   0   0  456.02   14.77 
   1   0   0  450.62   14.74 
  -2   0   0   37.56    1.46 
  -2   0   0   39.50    1.70 
  -2   0   0   35.78    1.54 
  -2   0   0   36.05    1.55 
  -2   0   0   36.45    1.59 
   2   0   0   35.50    1.42 
   2   0   0   37.19    1.55 
   2   0   0   37.99    1.60 
   2   0   0   36.71    1.59 
   2   0   0   36.24    1.62 
   2   0   0   37.74    1.46 
   2   0   0   36.39    1.53 
  -3   0   0   19.92    1.13 
  -3   0   0   18.07    1.23 
  -3   0   0   19.28    0.99 
  -3   0   0   20.31    1.18 
   3   0   0   19.55    1.17 
   3   0   0   21.29    1.02 
   3   0   0   18.10    1.17 
   3   0   0   20.88    0.98 
   3   0   0   18.33    1.09 
  -4   0   0    0.46    0.33 
  -4   0   0    0.42    0.34 
  -4   0   0    0.04    0.27 
  -4   0   0    0.17    0.21 
   4   0   0    0.79    0.33 
   4   0   0    0.27    0.31 
   4   0   0    0.31    0.35 
   4   0   0    0.17    0.21 
  -5   0   0    2.18    0.59 
  -5   0   0    0.73    0.45 
  -5   0   0    1.83    0.54 
   5   0   0    1.88    0.52 
   5   0   0    2.14    0.65 
   5   0   0    2.05    0.59 
   5   0   0    1.71    0.39 
  -6   0   0    0.08    0.35 
  -6   0   0    0.16    0.43 
  -6   0   0   -0.14    0.27 
   6   0   0    0.69    0.42 
   6   0   0    0.34    0.37 
   6   0   0   -0.09    0.24 
   6   0   0    0.41    0.36 
  -7   0   0   47.90    2.80 
  -7   0   0   44.18    2.59 
  -7   0   0   41.67    2.87 
   7   0   0   43.49    2.16 
   7   0   0   41.75    2.79 
   7   0   0   46.15    2.60 
   7   0   0   43.21    2.69 
  -8   0   0   36.24    2.54 
  -8   0   0   34.25    3.25 
  -8   0   0   35.28    2.41 
   8   0   0   36.13    2.40 
   8   0   0   36.48    2.56 
   8   0   0   35.89    2.71 
  -9   0   0    0.80    0.63 
  -9   0   0    0.96    0.84 
  -9   0   0   -0.80    0.37 
   9   0   0   -0.58    0.26 
   9   0   0   -0.70    0.41 
   9   0   0    0.40    0.65 
 -10   0   0   15.25    2.18 
 -10   0   0   16.25    2.54 
 -10   0   0   17.50    2.21 
  10   0   0   19.01    2.65 
  10   0   0   17.16    2.32 
 -11   0   0    7.58    1.88 
  11   0   0    9.05    1.94 
  11   0   0    8.52    1.84 
 -12   0   0    0.54    0.99 
  12   0   0   -0.43    0.77 
  12   0   0   -0.33    0.93 
  12  -1   0    1.05    1.01 
  12  -1   0    0.56    1.09 
 -12   1   0    0.80    1.18 
  11  -1   0    5.02    1.59 
  11  -1   0    5.86    1.56 
 -11   1   0    3.53    1.46 
 -11   1   0    5.14    1.66 
  10  -1   0    0.95    0.74 
  10  -1   0    0.54    0.72 
  10  -1   0    0.83    0.78 
 -10   1   0    1.53    0.86 
 -10   1   0    1.67    1.04 
   9  -1   0   12.75    1.87 
   9  -1   0   19.01    2.46 
   9  -1   0   17.86    2.12 
  -9   1   0   18.91    2.21 
  -9   1   0   16.35    2.06 
  -9   1   0   16.25    2.34 
   8  -1   0    0.78    0.50 
   8  -1   0   -0.33    0.36 
   8  -1   0    1.15    0.62 
  -8   1   0   -0.51    0.44 
  -8   1   0    0.03    0.46 
  -8   1   0   -0.53    0.31 
   7  -1   0   20.27    1.99 
   7  -1   0   21.67    1.24 
   7  -1   0   18.20    1.94 
   7  -1   0   21.64    2.22 
  -7   1   0   21.86    2.33 
  -7   1   0   19.07    1.98 
  -7   1   0   18.27    1.89 
   6  -1   0   72.50    3.56 
   6  -1   0   69.81    3.72 
   6  -1   0   77.43    2.97 
   6  -1   0   73.69    3.57 
  -6   1   0   74.33    3.86 
  -6   1   0   77.72    3.59 
  -6   1   0   79.55    3.61 
   5  -1   0    0.43    0.37 
   5  -1   0    0.92    0.43 
   5  -1   0    0.09    0.31 
   5  -1   0    0.26    0.21 
  -5   1   0    0.06    0.35 
  -5   1   0    0.51    0.36 
  -5   1   0    0.98    0.49 
   4  -1   0   84.33    3.40 
   4  -1   0   79.95    3.51 
   4  -1   0   79.19    3.42 
   4  -1   0   80.27    2.91 
   4  -1   0   80.18    2.94 
  -4   1   0   81.09    3.58 
  -4   1   0   82.21    3.36 
  -4   1   0   74.72    3.33 
   3  -1   0   43.79    2.11 
   3  -1   0   45.13    1.68 
   3  -1   0   43.73    2.00 
   3  -1   0   44.93    1.66 
   3  -1   0   48.09    2.12 
  -3   1   0   43.73    1.98 
  -3   1   0   43.80    2.15 
  -3   1   0   45.57    2.05 
   2  -1   0  243.16    8.32 
   2  -1   0  247.92    8.31 
   2  -1   0  254.81    8.03 
   2  -1   0  246.85    8.01 
   2  -1   0  244.73    8.44 
   2  -1   0  247.81    8.46 
   2  -1   0  243.28    8.43 
  -2   1   0  255.00    8.33 
  -2   1   0  249.56    8.48 
  -2   1   0  248.78    8.34 
  -2   1   0  248.07    8.40 
   1  -1   0   99.06    3.51 
   1  -1   0   97.93    3.40 
   1  -1   0  104.60    3.40 
   1  -1   0   98.68    3.49 
   1  -1   0   97.60    3.49 
   1  -1   0  102.09    3.47 
   1  -1   0  103.38    3.49 
  -1   1   0   97.34    3.46 
  -1   1   0   91.86    3.46 
  -1   1   0   98.62    3.48 
  -1   1   0  103.92    3.51 
  -1   1   0   97.89    3.49 
  -1   1   0  102.19    3.41 
  -1   1   0  100.62    3.39 
   0   1   0    0.74    0.14 
   0   1   0    0.49    0.13 
   0   1   0    0.61    0.14 
   0   1   0    0.58    0.13 
   0   1   0    0.60    0.15 
   0   1   0    1.04    0.16 
   0   1   0    0.38    0.13 
  -1  -1   0  585.41   19.56 
  -1  -1   0  562.24   19.44 
  -1  -1   0  553.66   19.42 
  -1  -1   0  612.50   19.40 
  -1  -1   0  586.23   19.47 
   1   1   0  576.66   19.40 
   1   1   0  599.63   19.63 
   1   1   0  648.25   19.38 
   1   1   0  572.86   19.38 
   1   1   0  719.50   19.48 
  -2  -1   0   67.83    2.52 
  -2  -1   0   66.51    2.70 
  -2  -1   0   71.03    2.48 
  -2  -1   0   70.81    2.76 
  -2  -1   0   70.00    2.63 
   2   1   0   64.77    2.66 
   2   1   0   70.94    2.65 
   2   1   0   72.54    2.54 
   2   1   0   66.92    2.46 
   2   1   0   69.60    2.59 
   2   1   0   66.84    2.66 
  -3  -1   0   10.81    0.77 
  -3  -1   0    9.72    1.02 
  -3  -1   0   10.89    0.75 
  -3  -1   0   10.05    0.70 
  -3  -1   0   11.13    1.05 
   3   1   0   12.83    0.90 
   3   1   0   11.53    0.85 
   3   1   0   11.68    0.76 
   3   1   0   10.30    0.70 
  -4  -1   0   47.81    2.17 
  -4  -1   0   46.03    2.17 
  -4  -1   0   45.20    2.42 
  -4  -1   0   46.63    2.35 
   4   1   0   50.10    2.14 
   4   1   0   45.90    2.32 
   4   1   0   52.09    2.44 
   4   1   0   49.61    2.15 
  -5  -1   0    4.92    0.78 
  -5  -1   0    4.11    0.68 
  -5  -1   0    3.98    0.87 
  -5  -1   0    4.26    0.84 
   5   1   0    4.73    0.87 
   5   1   0    4.90    0.74 
   5   1   0    4.41    0.68 
   5   1   0    3.89    0.80 
  -6  -1   0   18.03    1.99 
  -6  -1   0   21.13    1.65 
  -6  -1   0   18.95    1.44 
   6   1   0   22.00    1.37 
   6   1   0   20.01    1.90 
   6   1   0   17.86    1.87 
   6   1   0   21.53    1.44 
  -7  -1   0    7.35    1.37 
  -7  -1   0    6.84    1.16 
  -7  -1   0    6.20    1.18 
   7   1   0    8.72    1.38 
   7   1   0    5.54    1.12 
   7   1   0    7.10    0.97 
   7   1   0    6.32    1.01 
  -8  -1   0    5.66    1.14 
  -8  -1   0    4.42    1.17 
  -8  -1   0    3.24    1.02 
   8   1   0    3.08    1.00 
   8   1   0    6.39    1.11 
   8   1   0    6.51    0.98 
   8   1   0    4.53    1.11 
  -9  -1   0    6.88    1.62 
  -9  -1   0   12.71    1.74 
  -9  -1   0    6.78    1.42 
   9   1   0    7.32    1.26 
   9   1   0    6.18    1.37 
   9   1   0    5.97    1.34 
 -10  -1   0    1.29    0.85 
 -10  -1   0    0.13    0.63 
 -10  -1   0    0.04    0.74 
  10   1   0    0.41    0.71 
  10   1   0    0.51    0.72 
 -11  -1   0    4.82    1.61 
  11   1   0    5.38    1.69 
  11   1   0    4.26    1.29 
 -12  -1   0    5.39    1.80 
  12   1   0    3.25    1.48 
  12   1   0    3.08    1.34 
  12  -2   0    3.81    1.92 
  11  -2   0    0.16    0.89 
  11  -2   0    0.79    0.81 
 -11   2   0   -0.83    0.60 
 -11   2   0   -0.54    0.83 
  10  -2   0    4.32    1.23 
  10  -2   0    4.52    1.46 
  10  -2   0    3.64    1.19 
 -10   2   0    5.07    1.51 
 -10   2   0    3.33    1.14 
   9  -2   0   -0.12    0.51 
   9  -2   0    0.19    0.53 
   9  -2   0   -0.05    0.47 
  -9   2   0    0.35    0.70 
  -9   2   0    1.18    0.72 
  -9   2   0    0.34    0.65 
   8  -2   0    4.61    1.27 
   8  -2   0    2.93    0.95 
   8  -2   0    5.07    1.14 
  -8   2   0    4.71    1.03 
  -8   2   0    5.22    1.29 
  -8   2   0    4.24    1.07 
   7  -2   0   15.05    1.79 
   7  -2   0   16.12    1.97 
   7  -2   0   16.44    1.80 
  -7   2   0   17.59    1.82 
  -7   2   0   13.88    1.69 
  -7   2   0   16.75    2.03 
   6  -2   0    3.61    0.42 
   6  -2   0    3.39    0.83 
   6  -2   0    4.96    0.95 
   6  -2   0    2.76    0.70 
   6  -2   0    3.53    0.44 
  -6   2   0    1.89    0.58 
  -6   2   0    2.94    0.86 
  -6   2   0    2.43    0.74 
   5  -2   0  129.31    4.34 
   5  -2   0  124.87    5.06 
   5  -2   0  125.43    5.22 
   5  -2   0  129.46    4.32 
   5  -2   0  120.56    5.29 
  -5   2   0  128.11    5.04 
  -5   2   0  121.75    5.33 
  -5   2   0  129.13    5.18 
   4  -2   0   48.55    2.33 
   4  -2   0   50.40    1.76 
   4  -2   0   45.83    2.48 
   4  -2   0   46.74    2.46 
   4  -2   0   52.03    1.78 
  -4   2   0   49.20    2.30 
  -4   2   0   52.69    2.48 
  -4   2   0   46.92    2.51 
   3  -2   0   64.23    2.60 
   3  -2   0   59.93    2.75 
   3  -2   0   58.04    2.70 
   3  -2   0   64.40    2.79 
  -3   2   0   66.26    2.73 
  -3   2   0   58.62    2.73 
  -3   2   0   62.64    2.55 
   2  -2   0    7.48    0.80 
   2  -2   0    7.55    0.68 
   2  -2   0    7.89    0.81 
   2  -2   0    7.94    0.58 
   2  -2   0    7.37    0.77 
  -2   2   0    7.18    0.56 
  -2   2   0    7.93    0.80 
  -2   2   0    7.22    0.74 
  -2   2   0    7.02    0.76 
   1  -2   0    8.77    0.54 
   1  -2   0    8.58    0.44 
   1  -2   0    8.87    0.54 
   1  -2   0    9.14    0.66 
   1  -2   0    7.69    0.60 
   1  -2   0    7.71    0.60 
   1  -2   0    8.66    0.62 
  -1   2   0    8.07    0.53 
  -1   2   0    9.22    0.64 
  -1   2   0    8.46    0.61 
  -1   2   0    9.11    0.60 
  -1   2   0    7.72    0.52 
  -1   2   0    8.22    0.60 
  -1   2   0    7.79    0.52 
  -1   2   0    8.58    0.45 
   0  -2   0  212.75    7.11 
   0  -2   0  209.71    7.04 
   0  -2   0  210.67    7.06 
   0  -2   0  205.77    7.10 
   0  -2   0  209.19    7.05 
   0  -2   0  210.01    7.06 
   0  -2   0  210.73    7.08 
   0   2   0  215.17    7.06 
   0   2   0  213.21    7.05 
   0   2   0  212.35    7.04 
   0   2   0  222.84    7.13 
   0   2   0  216.09    7.11 
   0   2   0  214.82    7.09 
   0   2   0  211.33    7.05 
  -1  -2   0  318.52   11.57 
  -1  -2   0  374.64   11.88 
  -1  -2   0  366.21   11.90 
  -1  -2   0  370.47   11.70 
  -1  -2   0  373.29   11.98 
  -1  -2   0  386.65   11.97 
  -1  -2   0  377.75   11.80 
   1   2   0  363.38   11.69 
   1   2   0  332.97   11.64 
   1   2   0  373.57   11.90 
   1   2   0  333.11   11.58 
   1   2   0  362.52   11.91 
   1   2   0  361.02   11.87 
   1   2   0  362.82   11.78 
  -2  -2   0    0.16    0.21 
  -2  -2   0    0.00    0.19 
  -2  -2   0    0.13    0.28 
  -2  -2   0    0.21    0.19 
  -2  -2   0    0.05    0.11 
   2   2   0    0.14    0.11 
   2   2   0    0.12    0.24 
   2   2   0    0.34    0.24 
   2   2   0   -0.05    0.15 
   2   2   0   -0.30    0.11 
  -3  -2   0   16.67    1.16 
  -3  -2   0   19.48    1.27 
  -3  -2   0   21.71    1.09 
  -3  -2   0   22.26    0.98 
  -3  -2   0   19.94    1.31 
   3   2   0   19.77    1.16 
   3   2   0   19.61    1.20 
   3   2   0   20.80    1.26 
   3   2   0   19.43    0.95 
  -4  -2   0   42.74    2.28 
  -4  -2   0   46.80    2.03 
  -4  -2   0   40.47    2.09 
  -4  -2   0   42.31    2.29 
   4   2   0   43.66    1.88 
   4   2   0   42.16    2.20 
   4   2   0   41.61    2.04 
   4   2   0   45.07    2.26 
  -5  -2   0   80.60    3.51 
  -5  -2   0   79.50    3.81 
  -5  -2   0   85.01    3.44 
  -5  -2   0   77.06    3.72 
   5   2   0   78.30    3.42 
   5   2   0   81.04    3.69 
   5   2   0   84.78    3.76 
   5   2   0   84.09    3.31 
  -6  -2   0   13.70    1.35 
  -6  -2   0   14.15    1.42 
  -6  -2   0   12.35    1.55 
  -6  -2   0   10.90    1.52 
   6   2   0   13.29    1.24 
   6   2   0   10.89    1.24 
   6   2   0   11.30    1.50 
   6   2   0   11.44    1.47 
  -7  -2   0    0.52    0.49 
  -7  -2   0    0.78    0.57 
  -7  -2   0    1.12    0.68 
   7   2   0    0.47    0.37 
   7   2   0    1.25    0.50 
   7   2   0    0.83    0.64 
   7   2   0    0.27    0.39 
  -8  -2   0   48.50    3.19 
  -8  -2   0   41.99    2.94 
  -8  -2   0   42.26    2.59 
   8   2   0   43.26    2.97 
   8   2   0   43.58    2.49 
   8   2   0   41.21    2.43 
   8   2   0   41.06    2.86 
  -9  -2   0    1.53    0.85 
  -9  -2   0   -0.90    0.35 
  -9  -2   0    0.75    0.74 
   9   2   0    0.93    0.69 
   9   2   0    0.53    0.70 
 -10  -2   0   10.95    2.04 
 -10  -2   0   14.61    2.19 
  10   2   0   17.02    2.41 
  10   2   0   15.72    2.41 
 -11  -2   0    3.63    1.29 
 -11  -2   0    2.57    1.36 
  11   2   0    3.39    1.35 
  11   2   0    2.42    1.14 
 -12  -2   0   -0.41    0.96 
  12   2   0    1.47    1.11 
  12   2   0   -0.39    0.51 
  11  -3   0    3.91    1.52 
  11  -3   0    4.06    1.21 
  11  -3   0    5.51    1.52 
 -11   3   0    2.59    1.13 
 -11   3   0    4.94    1.43 
  10  -3   0    1.36    0.93 
  10  -3   0    0.64    0.70 
  10  -3   0   -0.06    0.79 
 -10   3   0    1.17    0.82 
 -10   3   0    0.37    0.72 
   9  -3   0    7.73    1.51 
   9  -3   0    9.28    1.58 
   9  -3   0    7.14    1.55 
  -9   3   0    6.32    1.56 
  -9   3   0    5.83    1.36 
  -9   3   0    7.67    1.58 
   8  -3   0    0.76    0.62 
   8  -3   0    0.38    0.54 
   8  -3   0    1.08    0.60 
  -8   3   0    0.98    0.66 
  -8   3   0    1.01    0.70 
  -8   3   0    1.01    0.62 
   7  -3   0    6.47    1.26 
   7  -3   0    4.08    1.04 
   7  -3   0    4.36    0.98 
  -7   3   0    4.81    1.20 
  -7   3   0    9.54    1.32 
  -7   3   0    7.26    1.27 
   6  -3   0   22.06    2.15 
   6  -3   0   21.40    1.61 
   6  -3   0   22.67    2.21 
  -6   3   0   22.74    1.60 
  -6   3   0   21.60    2.17 
  -6   3   0   21.02    2.05 
   5  -3   0    3.56    0.84 
   5  -3   0    2.07    0.67 
   5  -3   0    1.42    0.50 
  -5   3   0    2.13    0.67 
  -5   3   0    2.29    0.64 
  -5   3   0    3.01    0.65 
   4  -3   0   17.42    1.59 
   4  -3   0   16.87    1.59 
   4  -3   0   14.62    1.10 
  -4   3   0   15.28    1.50 
  -4   3   0   15.28    1.42 
  -4   3   0   16.23    1.12 
   3  -3   0   72.69    3.20 
   3  -3   0   73.41    3.18 
   3  -3   0   74.04    2.96 
   3  -3   0   68.84    3.17 
  -3   3   0   70.26    3.12 
  -3   3   0   77.40    2.95 
  -3   3   0   69.16    3.11 
   2  -3   0    2.67    0.54 
   2  -3   0    2.17    0.40 
   2  -3   0    2.29    0.43 
   2  -3   0    3.10    0.56 
   2  -3   0    2.79    0.26 
   2  -3   0    1.97    0.45 
  -2   3   0    1.92    0.42 
  -2   3   0    2.47    0.25 
  -2   3   0    2.28    0.23 
  -2   3   0    2.58    0.51 
  -2   3   0    2.60    0.41 
   1  -3   0  593.14   19.40 
   1  -3   0  593.00   19.59 
   1  -3   0  610.28   19.41 
   1  -3   0  592.48   19.43 
   1  -3   0  590.38   19.51 
   1  -3   0  599.26   19.55 
   1  -3   0  595.73   19.30 
   1  -3   0  587.35   19.56 
  -1   3   0  613.83   19.31 
  -1   3   0  597.23   19.44 
  -1   3   0  583.56   19.39 
  -1   3   0  610.23   19.41 
  -1   3   0  576.53   19.50 
  -1   3   0  605.05   19.51 
   0  -3   0    8.39    0.77 
   0  -3   0    8.12    0.63 
   0  -3   0    8.44    0.60 
   0  -3   0    7.40    0.59 
   0  -3   0    9.57    0.66 
   0  -3   0    7.98    0.60 
   0  -3   0    8.43    0.61 
   0   3   0    8.79    0.62 
   0   3   0    9.41    0.64 
   0   3   0    8.76    0.60 
   0   3   0    9.02    0.65 
   0   3   0    8.47    0.61 
   0   3   0    8.72    0.79 
   0   3   0    9.82    0.90 
  -1  -3   0  388.82   12.82 
  -1  -3   0  385.32   12.59 
  -1  -3   0  378.44   12.87 
  -1  -3   0  407.93   12.68 
  -1  -3   0  381.84   12.81 
  -1  -3   0  395.38   12.92 
   1   3   0  390.09   12.76 
   1   3   0  393.78   12.58 
   1   3   0  393.23   12.50 
   1   3   0  384.26   12.64 
   1   3   0  325.80   12.44 
   1   3   0  398.22   12.72 
  -2  -3   0  108.81    4.22 
  -2  -3   0  115.66    4.31 
  -2  -3   0  110.58    4.20 
  -2  -3   0  112.11    3.63 
  -2  -3   0  105.59    3.83 
   2   3   0  108.58    3.63 
   2   3   0  111.30    3.85 
   2   3   0  105.11    4.01 
   2   3   0  108.71    4.15 
   2   3   0  109.34    4.15 
  -3  -3   0    3.89    0.50 
  -3  -3   0    4.49    0.73 
  -3  -3   0    3.33    0.70 
  -3  -3   0    4.06    0.37 
  -3  -3   0    3.54    0.64 
   3   3   0    3.65    0.35 
   3   3   0    5.15    0.72 
   3   3   0    3.41    0.59 
   3   3   0    3.70    0.63 
  -4  -3   0    7.32    0.56 
  -4  -3   0    8.66    1.16 
  -4  -3   0    9.24    1.15 
  -4  -3   0    7.19    0.79 
  -4  -3   0    7.28    0.98 
   4   3   0    8.86    1.00 
   4   3   0    7.91    0.57 
   4   3   0    6.27    0.93 
   4   3   0    7.88    0.99 
  -5  -3   0    1.39    0.52 
  -5  -3   0    0.58    0.34 
  -5  -3   0    0.64    0.48 
  -5  -3   0    0.92    0.47 
   5   3   0    0.93    0.46 
   5   3   0    1.12    0.45 
   5   3   0    1.05    0.46 
   5   3   0    1.23    0.34 
  -6  -3   0   46.82    2.81 
  -6  -3   0   42.01    2.26 
  -6  -3   0   43.08    2.76 
  -6  -3   0   43.76    2.48 
   6   3   0   47.78    2.47 
   6   3   0   50.23    2.20 
   6   3   0   44.52    2.67 
   6   3   0   40.66    2.53 
  -7  -3   0   10.75    1.44 
  -7  -3   0   13.33    1.43 
  -7  -3   0   12.13    1.73 
  -7  -3   0   10.98    1.70 
   7   3   0   13.20    1.72 
   7   3   0   10.16    1.52 
   7   3   0   10.14    1.13 
   7   3   0   11.87    1.41 
  -8  -3   0    0.92    0.63 
  -8  -3   0    0.16    0.70 
  -8  -3   0    0.22    0.47 
   8   3   0   -0.06    0.39 
   8   3   0    0.37    0.61 
   8   3   0   -0.71    0.42 
  -9  -3   0   20.89    2.56 
  -9  -3   0   20.30    2.64 
   9   3   0   18.43    2.40 
   9   3   0   18.51    2.41 
 -10  -3   0    0.71    0.89 
 -10  -3   0    0.20    0.68 
  10   3   0    0.56    0.74 
  10   3   0   -0.26    0.41 
 -11  -3   0    1.13    0.97 
 -11  -3   0    1.21    0.93 
  11   3   0    2.39    1.15 
  11   3   0    1.50    1.00 
  12   3   0    5.48    1.71 
  12   3   0    7.06    1.85 
  11  -4   0   -0.22    0.77 
  11  -4   0   -0.26    0.70 
 -11   4   0    0.16    0.80 
 -11   4   0    1.35    1.10 
  10  -4   0    6.07    1.53 
  10  -4   0    3.10    1.27 
  10  -4   0    3.50    1.15 
 -10   4   0    4.41    1.47 
 -10   4   0    4.78    1.37 
   9  -4   0   -0.01    0.59 
   9  -4   0    0.28    0.57 
   9  -4   0    0.06    0.51 
  -9   4   0    0.23    0.64 
  -9   4   0    0.42    0.67 
   8  -4   0    3.96    1.16 
   8  -4   0    5.14    1.24 
   8  -4   0    4.98    1.08 
  -8   4   0    5.43    1.32 
  -8   4   0    3.39    0.88 
  -8   4   0    4.91    1.15 
   7  -4   0    9.98    1.40 
   7  -4   0    9.36    1.55 
   7  -4   0    8.91    1.57 
  -7   4   0    7.62    1.46 
  -7   4   0    9.21    1.28 
  -7   4   0    8.20    1.38 
   6  -4   0    4.57    1.08 
   6  -4   0    6.11    1.01 
   6  -4   0    5.27    1.11 
  -6   4   0    5.82    0.92 
  -6   4   0    4.79    1.02 
  -6   4   0    5.72    1.14 
   5  -4   0  146.29    6.20 
   5  -4   0  144.77    5.81 
   5  -4   0  146.57    6.22 
  -5   4   0  154.38    6.13 
  -5   4   0  150.47    6.20 
  -5   4   0  153.61    5.78 
   4  -4   0  136.12    5.38 
   4  -4   0  120.99    5.31 
   4  -4   0  127.25    4.97 
   4  -4   0  132.67    5.34 
  -4   4   0  130.62    5.26 
  -4   4   0  118.66    5.20 
  -4   4   0  133.73    4.95 
   3  -4   0   27.07    1.77 
   3  -4   0   29.21    1.55 
   3  -4   0   25.90    1.66 
   3  -4   0   26.28    1.72 
  -3   4   0   27.70    1.03 
  -3   4   0   29.48    1.69 
  -3   4   0   29.13    1.02 
  -3   4   0   27.26    1.67 
  -3   4   0   28.13    1.48 
   2  -4   0  289.88   10.44 
   2  -4   0  302.28    9.89 
   2  -4   0  299.34   10.41 
   2  -4   0  310.57   10.55 
   2  -4   0  290.21   10.17 
  -2   4   0  309.30   10.40 
  -2   4   0  309.08    9.86 
  -2   4   0  294.13   10.13 
  -2   4   0  289.28   10.35 
  -2   4   0  304.68    9.89 
   1  -4   0    1.33    0.31 
   1  -4   0    0.62    0.27 
   1  -4   0    1.34    0.38 
   1  -4   0    0.80    0.31 
   1  -4   0    1.07    0.37 
   1  -4   0    0.90    0.35 
   1  -4   0    0.68    0.36 
  -1   4   0    1.07    0.32 
  -1   4   0    1.05    0.34 
  -1   4   0    0.74    0.27 
   0  -4   0   69.65    2.89 
   0  -4   0   68.26    2.80 
   0  -4   0   73.85    2.83 
   0  -4   0   69.20    2.81 
   0  -4   0   70.96    2.80 
   0  -4   0   69.00    2.90 
   0  -4   0   69.09    2.84 
   0   4   0   74.68    2.77 
  -1  -4   0   46.95    2.15 
  -1  -4   0   46.19    2.20 
  -1  -4   0   47.39    1.94 
  -1  -4   0   51.72    2.25 
  -1  -4   0   46.03    2.12 
  -1  -4   0   47.19    1.87 
   1   4   0   44.82    2.01 
   1   4   0   48.65    2.15 
   1   4   0   46.83    1.96 
   1   4   0   43.75    1.83 
   1   4   0   46.57    2.06 
   1   4   0   48.84    1.84 
  -2  -4   0   12.26    0.76 
  -2  -4   0   11.66    1.16 
  -2  -4   0   12.99    1.25 
  -2  -4   0   11.18    1.12 
   2   4   0   12.26    0.84 
   2   4   0   12.57    0.98 
   2   4   0   11.25    1.06 
   2   4   0   12.91    0.60 
   2   4   0   12.62    0.60 
   2   4   0   12.30    0.75 
  -3  -4   0  200.07    7.95 
  -3  -4   0  216.58    7.95 
  -3  -4   0  216.11    7.96 
  -3  -4   0  228.39    7.09 
  -3  -4   0  215.57    7.40 
   3   4   0  225.41    7.74 
   3   4   0  224.39    7.09 
   3   4   0  204.76    7.81 
   3   4   0  212.28    7.82 
  -4  -4   0   38.86    1.84 
  -4  -4   0   38.60    2.25 
  -4  -4   0   40.36    1.58 
  -4  -4   0   45.62    2.44 
  -4  -4   0   39.42    2.33 
   4   4   0   43.04    2.19 
   4   4   0   43.54    2.24 
   4   4   0   40.79    1.59 
   4   4   0   40.89    2.27 
  -5  -4   0  110.59    4.88 
  -5  -4   0  118.34    4.45 
  -5  -4   0  111.90    5.09 
  -5  -4   0  115.26    5.11 
  -5  -4   0  121.09    4.24 
   5   4   0  118.56    4.91 
   5   4   0  112.88    4.96 
   5   4   0  111.08    4.77 
   5   4   0  115.00    4.13 
  -6  -4   0   62.93    3.55 
  -6  -4   0   65.82    3.36 
  -6  -4   0   65.25    3.59 
  -6  -4   0   68.61    2.99 
   6   4   0   64.50    3.24 
   6   4   0   64.41    3.39 
   6   4   0   56.48    3.33 
   6   4   0   71.00    2.74 
  -7  -4   0    3.39    0.75 
  -7  -4   0    3.31    1.02 
  -7  -4   0    4.51    1.10 
  -7  -4   0    4.36    0.96 
   7   4   0    2.73    0.84 
   7   4   0    2.97    0.83 
   7   4   0    2.96    0.58 
   7   4   0    2.47    0.79 
  -8  -4   0   -0.18    0.56 
  -8  -4   0    2.05    0.72 
  -8  -4   0    0.77    0.69 
   8   4   0    1.00    0.58 
   8   4   0    1.94    0.85 
   8   4   0    1.09    0.64 
  -9  -4   0    1.43    0.78 
  -9  -4   0    0.17    0.56 
   9   4   0    1.21    0.79 
   9   4   0    0.42    0.52 
   9   4   0    0.34    0.51 
 -10  -4   0    6.61    1.62 
 -10  -4   0    7.96    1.86 
  10   4   0    8.29    1.80 
  10   4   0    6.50    1.55 
 -11  -4   0   -0.04    0.76 
 -11  -4   0    2.70    1.21 
  11   4   0    0.41    0.82 
  11   4   0    1.67    1.15 
  11  -5   0   11.33    2.40 
  11  -5   0    8.12    1.90 
 -11   5   0    5.75    1.77 
 -11   5   0   10.38    2.12 
  10  -5   0    0.53    0.83 
  10  -5   0    1.41    1.02 
 -10   5   0   -0.20    0.73 
 -10   5   0    0.88    0.79 
   9  -5   0    4.81    1.10 
   9  -5   0    6.41    1.56 
   9  -5   0    5.66    1.46 
  -9   5   0    5.14    1.31 
  -9   5   0    3.08    1.16 
   8  -5   0    7.88    1.57 
   8  -5   0    7.81    1.58 
   8  -5   0    7.08    1.28 
  -8   5   0    5.03    1.26 
  -8   5   0    7.36    1.44 
  -8   5   0    5.61    1.34 
   7  -5   0   17.47    2.17 
   7  -5   0   12.95    1.59 
   7  -5   0   15.86    2.09 
  -7   5   0   17.47    1.75 
  -7   5   0   15.87    2.08 
  -7   5   0   20.91    2.26 
   6  -5   0   54.56    2.88 
   6  -5   0   56.41    3.31 
   6  -5   0   53.51    3.22 
  -6   5   0   58.01    2.86 
  -6   5   0   53.52    3.21 
  -6   5   0   55.48    3.18 
   5  -5   0    1.47    0.58 
   5  -5   0    1.27    0.52 
   5  -5   0    1.85    0.69 
   5  -5   0    1.23    0.61 
  -5   5   0    1.32    0.55 
  -5   5   0    0.71    0.42 
  -5   5   0    0.97    0.49 
   4  -5   0  145.12    5.98 
   4  -5   0  147.08    5.61 
   4  -5   0  143.19    5.93 
   4  -5   0  144.09    6.05 
  -4   5   0  144.82    5.87 
  -4   5   0  146.33    5.53 
  -4   5   0  143.43    5.88 
   3  -5   0  104.79    4.50 
   3  -5   0  109.77    4.21 
   3  -5   0  104.94    4.57 
   3  -5   0   98.72    4.39 
   3  -5   0  102.80    3.67 
  -3   5   0  106.66    3.68 
  -3   5   0  110.47    4.46 
  -3   5   0  107.53    3.65 
  -3   5   0  102.58    4.37 
  -3   5   0  106.97    4.13 
   2  -5   0   27.75    1.52 
   2  -5   0   31.53    1.81 
   2  -5   0   32.32    1.74 
   2  -5   0   28.90    1.36 
   2  -5   0   28.88    1.73 
  -2   5   0   27.68    1.65 
  -2   5   0   27.52    1.63 
  -2   5   0   27.56    1.30 
  -2   5   0   29.82    1.54 
   1  -5   0  106.96    4.22 
   1  -5   0  108.14    4.05 
   1  -5   0  108.24    4.15 
   1  -5   0  103.43    3.98 
   1  -5   0  104.41    4.14 
   1  -5   0   98.70    4.17 
   1  -5   0  108.04    4.21 
  -1   5   0  109.52    3.95 
  -1   5   0  104.50    4.13 
  -1   5   0  106.42    4.06 
   0  -5   0   -0.04    0.17 
   0  -5   0    0.11    0.25 
   0  -5   0    0.09    0.27 
   0  -5   0    0.56    0.31 
   0  -5   0   -0.18    0.20 
   0  -5   0   -0.05    0.23 
   0  -5   0   -0.15    0.22 
   0   5   0    0.02    0.22 
   0   5   0    0.10    0.21 
  -1  -5   0   57.67    2.61 
  -1  -5   0   58.66    2.72 
  -1  -5   0   54.41    2.36 
  -1  -5   0   55.26    2.56 
  -1  -5   0   59.09    2.68 
  -1  -5   0   58.34    2.32 
   1   5   0   55.02    2.49 
   1   5   0   58.40    2.41 
   1   5   0   56.16    2.56 
   1   5   0   58.82    2.28 
  -2  -5   0    2.74    0.68 
  -2  -5   0    4.68    0.58 
  -2  -5   0    5.09    0.84 
  -2  -5   0    4.36    0.74 
   2   5   0    4.96    0.79 
   2   5   0    2.71    0.57 
   2   5   0    5.27    0.48 
   2   5   0    4.64    0.63 
   2   5   0    4.47    0.43 
  -3  -5   0   73.61    3.40 
  -3  -5   0   71.38    2.84 
  -3  -5   0   72.91    3.44 
  -3  -5   0   70.32    3.32 
   3   5   0   69.66    3.07 
   3   5   0   73.47    2.50 
   3   5   0   69.22    3.23 
   3   5   0   73.46    2.50 
   3   5   0   72.82    3.29 
  -4  -5   0   57.14    2.40 
  -4  -5   0   53.29    2.91 
  -4  -5   0   54.34    2.93 
  -4  -5   0   54.12    3.01 
  -4  -5   0   59.55    1.99 
   4   5   0   55.86    1.98 
   4   5   0   53.91    2.85 
   4   5   0   60.64    2.78 
   4   5   0   54.30    2.81 
  -5  -5   0    1.38    0.66 
  -5  -5   0    1.50    0.26 
  -5  -5   0    1.35    0.57 
  -5  -5   0    1.35    0.42 
  -5  -5   0    1.19    0.56 
   5   5   0    0.82    0.48 
   5   5   0    1.95    0.69 
   5   5   0    0.78    0.20 
   5   5   0    1.80    0.54 
  -6  -5   0   14.26    1.70 
  -6  -5   0   12.67    1.72 
  -6  -5   0   11.44    1.18 
  -6  -5   0    9.99    1.56 
   6   5   0   15.04    1.76 
   6   5   0   12.96    0.78 
   6   5   0   12.35    1.51 
   6   5   0   14.75    1.69 
  -7  -5   0   48.43    3.00 
  -7  -5   0   49.05    3.30 
  -7  -5   0   51.67    3.30 
  -7  -5   0   52.60    2.61 
   7   5   0   53.76    3.23 
   7   5   0   51.11    2.97 
   7   5   0   52.31    3.07 
  -8  -5   0   12.69    2.05 
  -8  -5   0   15.18    2.21 
  -8  -5   0   12.61    1.75 
   8   5   0   11.49    1.79 
   8   5   0    8.01    1.49 
   8   5   0   13.69    1.76 
  -9  -5   0   12.14    2.15 
  -9  -5   0    8.53    1.79 
   9   5   0    9.33    1.50 
   9   5   0   12.75    1.96 
   9   5   0   10.24    1.82 
 -10  -5   0   -0.24    0.85 
 -10  -5   0    0.06    0.71 
  10   5   0    0.50    0.79 
  10   5   0    1.07    0.82 
 -11  -5   0    5.54    1.75 
 -11  -5   0    9.64    2.15 
  11   5   0    8.99    1.96 
  11   5   0    8.09    1.79 
  11  -6   0    0.10    0.73 
  11  -6   0   -0.40    0.85 
 -11   6   0    0.79    1.09 
 -11   6   0    2.33    1.27 
  10  -6   0    7.55    1.83 
  10  -6   0    7.34    1.79 
 -10   6   0    7.55    1.78 
 -10   6   0    9.89    1.93 
   9  -6   0    4.75    1.38 
   9  -6   0    3.41    0.98 
   9  -6   0    2.53    1.11 
  -9   6   0    1.87    0.93 
  -9   6   0    2.50    1.10 
   8  -6   0    5.69    1.40 
   8  -6   0    5.68    1.20 
   8  -6   0    4.73    1.31 
  -8   6   0    2.70    1.09 
  -8   6   0    2.44    0.97 
   7  -6   0   56.26    3.12 
   7  -6   0   57.00    3.62 
   7  -6   0   57.90    3.61 
  -7   6   0   51.99    3.45 
  -7   6   0   54.97    2.98 
  -7   6   0   59.50    3.49 
   6  -6   0   10.00    1.61 
   6  -6   0    8.50    1.30 
   6  -6   0   11.59    1.74 
  -6   6   0   10.40    1.60 
  -6   6   0    9.53    1.53 
  -6   6   0   10.66    1.31 
   5  -6   0   30.32    2.22 
   5  -6   0   29.58    2.25 
   5  -6   0   30.24    1.95 
   5  -6   0   34.77    2.43 
  -5   6   0   36.55    2.01 
  -5   6   0   28.75    2.14 
  -5   6   0   34.74    2.31 
   4  -6   0    6.52    1.14 
   4  -6   0    7.85    1.25 
   4  -6   0    4.91    1.04 
   4  -6   0    7.57    1.01 
  -4   6   0    6.29    1.10 
  -4   6   0    6.42    0.37 
  -4   6   0    6.08    1.05 
  -4   6   0    7.47    0.40 
  -4   6   0    5.41    0.83 
   3  -6   0    6.04    1.05 
   3  -6   0    9.06    1.27 
   3  -6   0    8.01    1.15 
   3  -6   0    7.16    0.96 
   3  -6   0    6.41    0.64 
  -3   6   0    9.57    0.82 
  -3   6   0    7.00    0.87 
  -3   6   0    8.57    1.13 
  -3   6   0    6.92    1.05 
  -3   6   0    7.24    0.55 
   2  -6   0    9.50    0.88 
   2  -6   0   10.82    1.24 
   2  -6   0    8.57    1.11 
   2  -6   0    7.41    0.93 
   2  -6   0    9.67    1.21 
   2  -6   0    8.13    1.14 
  -2   6   0   10.54    1.18 
  -2   6   0    7.91    1.03 
  -2   6   0    8.98    0.82 
  -2   6   0    9.98    1.03 
   1  -6   0    2.91    0.60 
   1  -6   0    2.23    0.53 
   1  -6   0    2.94    0.57 
   1  -6   0    4.05    0.73 
   1  -6   0    4.10    0.72 
   1  -6   0    3.19    0.64 
   1  -6   0    3.35    0.58 
  -1   6   0    3.10    0.53 
  -1   6   0    3.85    0.66 
  -1   6   0    3.57    0.64 
   0  -6   0   89.03    3.59 
   0  -6   0   85.26    3.69 
   0  -6   0   86.77    3.60 
   0  -6   0   88.28    3.76 
   0  -6   0   84.67    3.59 
   0  -6   0   92.36    3.65 
   0  -6   0   90.14    3.69 
   0   6   0   83.57    3.49 
   0   6   0   90.01    3.53 
   0   6   0   84.77    3.56 
  -1  -6   0    9.51    0.95 
  -1  -6   0    9.01    1.06 
  -1  -6   0   11.08    1.07 
  -1  -6   0   10.04    1.16 
  -1  -6   0   10.81    0.97 
  -1  -6   0   11.29    1.23 
  -1  -6   0    9.02    1.18 
   1   6   0   10.72    1.06 
   1   6   0    9.77    0.74 
   1   6   0   11.01    1.16 
   1   6   0    9.04    0.94 
  -2  -6   0   38.38    1.86 
  -2  -6   0   40.75    2.26 
  -2  -6   0   38.49    2.30 
  -2  -6   0   44.10    2.27 
   2   6   0   42.56    2.21 
   2   6   0   40.66    1.97 
   2   6   0   40.99    1.71 
   2   6   0   36.43    2.07 
   2   6   0   39.61    1.68 
  -3  -6   0    8.68    1.19 
  -3  -6   0    8.00    1.19 
  -3  -6   0    7.61    1.10 
  -3  -6   0    8.25    0.84 
   3   6   0    5.48    0.93 
   3   6   0    7.76    0.49 
   3   6   0    9.85    1.04 
   3   6   0    9.23    1.14 
   3   6   0    7.40    0.47 
  -4  -6   0    5.63    1.08 
  -4  -6   0    5.19    0.99 
  -4  -6   0    4.79    0.67 
  -4  -6   0    3.42    0.89 
   4   6   0    7.90    1.15 
   4   6   0    4.84    0.25 
   4   6   0    5.19    0.26 
   4   6   0    5.56    0.89 
   4   6   0    6.61    1.06 
  -5  -6   0   64.84    3.46 
  -5  -6   0   71.02    3.69 
  -5  -6   0   67.07    2.80 
  -5  -6   0   57.91    3.38 
   5   6   0   61.49    3.17 
   5   6   0   62.38    3.29 
   5   6   0   62.95    3.37 
  -6  -6   0   16.59    1.19 
  -6  -6   0   13.12    1.82 
  -6  -6   0   19.01    2.06 
  -6  -6   0   16.17    2.02 
   6   6   0   18.83    1.89 
   6   6   0   15.75    1.88 
   6   6   0   14.35    1.74 
  -7  -6   0   -0.14    0.49 
  -7  -6   0    0.74    0.39 
  -7  -6   0    0.09    0.56 
  -7  -6   0    0.08    0.48 
   7   6   0   -0.04    0.43 
   7   6   0    0.29    0.55 
   7   6   0   -0.67    0.41 
  -8  -6   0    8.84    1.75 
  -8  -6   0    8.57    1.63 
  -8  -6   0    8.44    1.53 
   8   6   0    5.30    1.17 
   8   6   0    9.25    1.58 
   8   6   0    8.84    1.60 
  -9  -6   0    2.84    1.25 
  -9  -6   0    1.77    1.09 
   9   6   0    3.52    1.15 
   9   6   0    1.73    0.83 
   9   6   0    2.47    0.87 
 -10  -6   0    0.93    0.80 
 -10  -6   0    1.27    1.05 
  10   6   0    2.50    1.08 
  10   6   0    1.87    0.94 
 -11  -6   0    3.91    1.52 
 -11  -6   0    4.35    1.46 
  11   6   0    3.85    1.39 
  11   6   0    6.05    1.62 
  11  -7   0    8.34    1.98 
  11  -7   0    9.21    2.29 
 -11   7   0    4.87    1.45 
 -11   7   0    9.30    2.18 
  10  -7   0    0.25    0.67 
  10  -7   0    1.17    0.89 
 -10   7   0    1.08    0.93 
 -10   7   0    0.98    0.80 
   9  -7   0    0.34    0.84 
   9  -7   0    0.81    0.93 
  -9   7   0    1.04    0.88 
  -9   7   0    1.73    0.97 
   8  -7   0    9.61    1.86 
   8  -7   0   11.88    2.09 
   8  -7   0    8.36    1.47 
  -8   7   0   10.01    1.83 
  -8   7   0   13.84    2.08 
   7  -7   0    0.37    0.74 
   7  -7   0   -0.29    0.42 
   7  -7   0    0.42    0.57 
  -7   7   0    0.50    0.70 
  -7   7   0   -0.06    0.63 
  -7   7   0   -0.58    0.37 
   6  -7   0   39.82    2.77 
   6  -7   0   31.46    3.07 
   6  -7   0   33.77    2.22 
  -6   7   0   32.45    2.51 
  -6   7   0   36.24    2.20 
  -6   7   0   34.17    2.52 
   5  -7   0   41.69    2.32 
   5  -7   0   38.62    2.67 
   5  -7   0   34.36    2.49 
   5  -7   0   31.04    2.39 
  -5   7   0   41.50    2.22 
  -5   7   0   34.81    2.43 
  -5   7   0   32.38    2.35 
   4  -7   0   43.02    2.64 
   4  -7   0   45.50    2.42 
   4  -7   0   42.37    2.76 
   4  -7   0   36.60    2.57 
  -4   7   0   39.41    2.54 
  -4   7   0   42.83    2.59 
  -4   7   0   44.82    1.74 
  -4   7   0   44.52    2.33 
  -4   7   0   46.88    1.80 
   3  -7   0   20.88    1.96 
   3  -7   0   20.30    2.02 
   3  -7   0   19.46    1.96 
   3  -7   0   20.73    1.45 
   3  -7   0   21.85    1.21 
  -3   7   0   21.73    1.42 
  -3   7   0   19.01    1.83 
  -3   7   0   21.85    1.16 
  -3   7   0   22.30    1.65 
   2  -7   0   17.97    1.28 
   2  -7   0   16.16    1.15 
   2  -7   0   15.43    1.65 
   2  -7   0   21.52    1.95 
   2  -7   0   18.04    1.71 
   2  -7   0   18.91    1.77 
  -2   7   0   19.22    1.44 
  -2   7   0   18.81    1.69 
  -2   7   0   19.00    1.15 
  -2   7   0   16.90    1.28 
   1  -7   0   63.47    2.91 
   1  -7   0   66.08    2.91 
   1  -7   0   62.10    3.03 
   1  -7   0   64.26    3.08 
   1  -7   0   60.61    3.00 
   1  -7   0   61.49    2.98 
   1  -7   0   67.51    3.13 
  -1   7   0   63.81    2.95 
  -1   7   0   64.71    2.82 
  -1   7   0   65.14    3.01 
   0  -7   0   23.65    1.54 
   0  -7   0   23.76    1.49 
   0  -7   0   24.00    1.52 
   0  -7   0   23.69    1.64 
   0  -7   0   22.14    1.49 
   0  -7   0   22.27    1.48 
   0  -7   0   22.37    1.57 
   0   7   0   22.59    1.45 
   0   7   0   25.28    1.48 
   0   7   0   22.50    1.41 
  -1  -7   0    6.71    1.05 
  -1  -7   0    3.96    0.73 
  -1  -7   0    3.56    0.76 
  -1  -7   0    4.33    0.80 
  -1  -7   0    4.93    0.88 
  -1  -7   0    4.40    0.70 
  -1  -7   0    5.24    0.72 
   1   7   0    5.13    0.86 
   1   7   0    4.43    0.74 
   1   7   0    4.35    0.62 
   1   7   0    4.80    0.74 
  -2  -7   0   96.00    4.17 
  -2  -7   0   87.87    4.01 
  -2  -7   0   92.93    3.63 
  -2  -7   0   86.62    4.13 
   2   7   0   87.81    3.96 
   2   7   0   92.02    3.93 
   2   7   0   89.88    3.40 
   2   7   0   84.13    3.64 
  -3  -7   0   17.69    1.93 
  -3  -7   0   20.08    1.90 
  -3  -7   0   19.65    1.96 
  -3  -7   0   18.69    1.18 
   3   7   0   19.58    0.96 
   3   7   0   19.41    0.95 
   3   7   0   16.84    1.27 
   3   7   0   15.73    1.62 
   3   7   0   18.64    1.79 
  -4  -7   0   47.83    3.02 
  -4  -7   0   57.61    2.45 
  -4  -7   0   49.12    2.95 
  -4  -7   0   50.84    3.01 
   4   7   0   54.46    1.83 
   4   7   0   51.56    2.89 
   4   7   0   48.85    2.82 
   4   7   0   56.69    1.83 
   4   7   0   48.50    2.63 
  -5  -7   0    1.86    0.76 
  -5  -7   0    3.17    0.61 
  -5  -7   0    2.58    0.85 
  -5  -7   0    4.51    1.04 
   5   7   0    2.96    0.76 
   5   7   0    2.53    0.77 
   5   7   0    2.76    0.83 
  -6  -7   0   26.76    1.57 
  -6  -7   0   22.52    2.49 
  -6  -7   0   25.14    2.62 
  -6  -7   0   22.20    2.38 
   6   7   0   28.64    2.63 
   6   7   0   26.04    1.96 
   6   7   0   24.88    2.39 
  -7  -7   0    5.70    1.38 
  -7  -7   0    9.60    1.60 
  -7  -7   0    6.12    1.41 
   7   7   0    6.32    1.23 
   7   7   0    8.79    1.52 
   7   7   0    5.69    1.27 
  -8  -7   0    0.85    0.72 
  -8  -7   0    1.10    0.94 
  -8  -7   0    0.62    0.80 
   8   7   0    0.80    0.66 
   8   7   0    1.35    0.73 
   8   7   0    0.04    0.49 
  -9  -7   0    3.42    1.30 
  -9  -7   0    4.43    1.31 
   9   7   0    4.50    1.19 
   9   7   0    5.14    1.38 
   9   7   0    3.80    1.18 
 -10  -7   0    2.31    1.25 
 -10  -7   0    2.30    1.30 
  10   7   0    5.28    1.38 
  10   7   0    2.88    1.09 
  10   7   0    0.73    0.76 
 -11  -7   0   -0.01    0.96 
 -11  -7   0   -0.18    0.79 
  11   7   0   -0.90    0.38 
  11   7   0    1.11    1.01 
  10  -8   0   15.74    2.65 
  10  -8   0   13.70    2.47 
 -10   8   0   12.47    2.19 
 -10   8   0   12.66    2.36 
   9  -8   0    1.35    0.91 
   9  -8   0    3.43    1.35 
  -9   8   0    1.75    0.87 
  -9   8   0    2.50    1.16 
   8  -8   0    6.70    1.54 
   8  -8   0   10.73    2.00 
  -8   8   0    6.09    1.49 
  -8   8   0    8.36    1.74 
   7  -8   0   40.85    3.76 
   7  -8   0   38.17    3.61 
   7  -8   0   45.76    2.77 
  -7   8   0   38.42    2.96 
  -7   8   0   33.78    3.30 
   6  -8   0   11.50    1.88 
   6  -8   0    7.63    1.54 
   6  -8   0    9.10    1.35 
  -6   8   0    5.08    1.29 
  -6   8   0    4.58    1.13 
  -6   8   0   10.28    1.35 
   5  -8   0    0.06    0.51 
   5  -8   0    0.03    0.44 
   5  -8   0    0.52    0.61 
   5  -8   0    0.27    0.45 
  -5   8   0    0.08    0.39 
  -5   8   0    0.21    0.49 
  -5   8   0    0.81    0.53 
   4  -8   0   25.58    2.43 
   4  -8   0   25.23    2.43 
   4  -8   0   25.86    2.53 
   4  -8   0   28.49    1.85 
  -4   8   0   26.50    2.01 
  -4   8   0   25.11    2.37 
  -4   8   0   24.94    1.28 
  -4   8   0   27.40    1.77 
   3  -8   0    1.06    0.53 
   3  -8   0    0.92    0.51 
   3  -8   0    0.97    0.46 
   3  -8   0    0.70    0.53 
   3  -8   0    1.83    0.46 
  -3   8   0    1.10    0.36 
  -3   8   0    1.19    0.52 
  -3   8   0    1.67    0.63 
  -3   8   0    1.07    0.51 
   2  -8   0    5.67    1.02 
   2  -8   0    5.16    0.98 
   2  -8   0    8.09    1.25 
   2  -8   0    7.69    1.18 
   2  -8   0    6.93    0.92 
   2  -8   0    7.60    1.00 
  -2   8   0    7.13    1.08 
  -2   8   0    5.14    0.93 
  -2   8   0    7.67    1.07 
  -2   8   0    6.65    0.85 
   1  -8   0    7.78    1.04 
   1  -8   0    7.44    1.09 
   1  -8   0    8.41    1.19 
   1  -8   0    7.53    1.04 
   1  -8   0    8.01    1.14 
   1  -8   0    7.37    1.10 
   1  -8   0    7.68    1.17 
  -1   8   0    9.10    1.18 
  -1   8   0    8.19    1.11 
  -1   8   0    6.47    0.93 
   0  -8   0  191.63    7.18 
   0  -8   0  185.78    7.21 
   0  -8   0  189.43    7.30 
   0  -8   0  180.16    7.29 
   0  -8   0  195.74    7.20 
   0  -8   0  187.58    7.13 
   0  -8   0  185.11    7.07 
   0   8   0  186.61    7.23 
   0   8   0  192.72    7.03 
   0   8   0  184.90    7.08 
   0   8   0  194.00    7.05 
  -1  -8   0   97.65    4.43 
  -1  -8   0  100.03    4.54 
  -1  -8   0   98.84    4.05 
  -1  -8   0   98.98    4.14 
  -1  -8   0   96.34    4.40 
  -1  -8   0  103.01    4.39 
  -1  -8   0   96.48    4.21 
   1   8   0   98.37    4.22 
   1   8   0  101.96    3.98 
   1   8   0   96.37    4.09 
   1   8   0  103.35    4.35 
  -2  -8   0   -0.14    0.41 
  -2  -8   0    0.04    0.25 
  -2  -8   0   -0.29    0.35 
  -2  -8   0    0.55    0.44 
  -2  -8   0    0.28    0.29 
   2   8   0   -0.27    0.20 
   2   8   0    0.49    0.33 
   2   8   0   -0.15    0.31 
   2   8   0   -0.05    0.19 
  -3  -8   0    7.31    1.24 
  -3  -8   0    9.42    1.01 
  -3  -8   0   10.44    1.55 
  -3  -8   0    8.89    1.39 
   3   8   0    9.50    1.26 
   3   8   0    9.82    0.68 
   3   8   0    8.48    1.08 
   3   8   0    9.49    1.32 
  -4  -8   0    6.77    0.88 
  -4  -8   0    5.35    1.13 
  -4  -8   0    7.66    1.37 
  -4  -8   0    5.88    1.20 
   4   8   0    7.25    0.42 
   4   8   0    7.27    1.22 
   4   8   0    7.58    1.27 
   4   8   0    6.14    0.99 
   4   8   0    8.08    0.53 
  -5  -8   0   12.27    1.21 
  -5  -8   0   14.03    1.85 
  -5  -8   0   12.37    1.76 
  -5  -8   0   10.09    1.64 
   5   8   0   14.65    1.79 
   5   8   0   10.99    1.55 
   5   8   0   15.88    1.69 
  -6  -8   0    2.88    0.98 
  -6  -8   0    2.68    0.97 
  -6  -8   0    1.68    0.75 
   6   8   0    2.40    0.78 
   6   8   0    3.34    1.03 
   6   8   0    1.35    0.73 
  -7  -8   0    0.73    0.72 
  -7  -8   0   -0.20    0.40 
  -7  -8   0   -0.23    0.51 
   7   8   0    0.24    0.53 
   7   8   0   -0.33    0.28 
   7   8   0   -0.04    0.51 
  -8  -8   0   10.95    1.85 
  -8  -8   0   11.32    2.10 
  -8  -8   0   12.16    2.17 
   8   8   0   12.83    2.09 
   8   8   0   12.05    1.85 
   8   8   0   11.66    1.87 
  -9  -8   0    3.02    1.25 
  -9  -8   0    1.34    0.98 
   9   8   0    0.81    0.76 
   9   8   0    1.71    0.96 
   9   8   0   -0.46    0.51 
 -10  -8   0    3.22    1.44 
 -10  -8   0    3.44    1.40 
  10   8   0    6.59    1.62 
  10   8   0    3.31    1.32 
  10   8   0    3.75    1.31 
 -11  -8   0    6.87    1.94 
 -11  -8   0    3.21    1.48 
  11   8   0    6.86    1.74 
  11   8   0    6.94    1.91 
  10  -9   0    0.51    0.85 
  10  -9   0    1.33    1.17 
 -10   9   0    0.70    0.93 
 -10   9   0    0.62    0.92 
   9  -9   0    5.76    1.59 
   9  -9   0    5.62    1.59 
  -9   9   0    4.15    1.38 
  -9   9   0   10.16    2.02 
   8  -9   0    3.63    1.32 
   8  -9   0   12.63    2.17 
  -8   9   0    5.86    1.53 
  -8   9   0    9.97    1.96 
   7  -9   0   -0.23    0.59 
   7  -9   0    1.53    0.84 
  -7   9   0    2.90    1.14 
  -7   9   0   -0.02    0.66 
   6  -9   0   87.42    4.18 
   6  -9   0   78.89    4.56 
   6  -9   0   75.04    4.64 
   6  -9   0   81.28    4.68 
  -6   9   0   93.72    4.15 
  -6   9   0   86.23    4.62 
  -6   9   0   73.43    4.35 
   5  -9   0   20.86    2.50 
   5  -9   0   22.67    2.12 
   5  -9   0   24.84    2.61 
   5  -9   0   19.40    2.38 
  -5   9   0   22.88    1.75 
  -5   9   0   22.88    2.44 
  -5   9   0   26.26    2.60 
   4  -9   0    3.67    0.81 
   4  -9   0    4.16    1.11 
   4  -9   0    5.71    1.21 
   4  -9   0    3.33    0.98 
  -4   9   0    3.05    0.89 
  -4   9   0    3.64    0.57 
  -4   9   0    3.56    0.79 
  -4   9   0    5.14    1.10 
   3  -9   0    0.83    0.39 
   3  -9   0    0.90    0.54 
   3  -9   0    1.34    0.70 
   3  -9   0    0.45    0.54 
   3  -9   0    2.49    0.69 
  -3   9   0    1.41    0.42 
  -3   9   0    1.36    0.52 
  -3   9   0    0.69    0.57 
  -3   9   0    0.52    0.51 
   2  -9   0   18.90    1.99 
   2  -9   0   14.95    1.72 
   2  -9   0   16.40    1.27 
   2  -9   0   12.80    1.63 
   2  -9   0   13.30    1.66 
   2  -9   0   16.88    1.60 
   2  -9   0   15.28    1.69 
  -2   9   0   16.64    1.77 
  -2   9   0   15.72    1.19 
  -2   9   0   15.45    1.69 
  -2   9   0   17.10    1.73 
   1  -9   0   68.17    3.45 
   1  -9   0   67.81    3.41 
   1  -9   0   65.48    3.43 
   1  -9   0   68.68    3.45 
   1  -9   0   68.23    3.29 
   1  -9   0   68.42    3.31 
   1  -9   0   66.64    3.48 
  -1   9   0   71.39    3.43 
  -1   9   0   69.59    3.37 
  -1   9   0   74.00    3.44 
  -1   9   0   71.82    3.20 
  -1   9   0   69.83    3.22 
   0  -9   0    3.28    0.77 
   0  -9   0    2.20    0.70 
   0  -9   0    2.23    0.66 
   0  -9   0    1.95    0.66 
   0  -9   0    2.11    0.65 
   0  -9   0    2.09    0.64 
   0  -9   0    0.97    0.54 
   0   9   0    1.78    0.56 
   0   9   0    1.75    0.62 
   0   9   0    1.49    0.55 
   0   9   0    2.32    0.62 
  -1  -9   0   34.30    2.29 
  -1  -9   0   35.77    2.31 
  -1  -9   0   33.89    2.03 
  -1  -9   0   28.30    2.21 
  -1  -9   0   32.26    2.15 
  -1  -9   0   37.98    2.18 
  -1  -9   0   34.98    1.98 
   1   9   0   34.49    2.00 
   1   9   0   31.71    2.12 
   1   9   0   37.64    1.94 
   1   9   0   37.55    2.16 
  -2  -9   0   59.94    2.65 
  -2  -9   0   57.20    2.75 
  -2  -9   0   50.92    3.19 
  -2  -9   0   60.70    3.22 
  -2  -9   0   57.04    3.23 
   2   9   0   53.11    2.93 
   2   9   0   55.04    2.52 
   2   9   0   55.05    3.05 
   2   9   0   59.25    2.82 
  -3  -9   0   22.81    2.24 
  -3  -9   0   19.66    1.37 
  -3  -9   0   19.42    2.12 
  -3  -9   0   21.21    2.28 
   3   9   0   19.48    1.45 
   3   9   0   19.94    1.14 
   3   9   0   15.25    1.80 
   3   9   0   21.71    2.05 
  -4  -9   0   13.61    1.89 
  -4  -9   0   14.43    1.92 
  -4  -9   0   13.01    1.82 
  -4  -9   0   16.33    1.43 
   4   9   0   11.28    1.60 
   4   9   0   11.45    1.60 
   4   9   0   15.49    1.61 
  -5  -9   0   16.64    1.23 
  -5  -9   0   16.13    2.10 
  -5  -9   0   12.53    1.94 
  -5  -9   0   17.29    2.17 
   5   9   0   14.65    1.88 
   5   9   0   17.21    1.81 
   5   9   0   17.07    2.03 
  -6  -9   0    5.79    1.33 
  -6  -9   0    5.67    1.30 
  -6  -9   0    5.13    1.31 
   6   9   0    8.10    1.34 
   6   9   0    5.73    1.25 
   6   9   0    4.80    1.17 
  -7  -9   0   23.70    2.88 
  -7  -9   0   16.75    2.42 
  -7  -9   0   27.75    3.02 
   7   9   0   21.76    2.31 
   7   9   0   21.35    2.49 
   7   9   0   18.24    2.37 
  -8  -9   0    1.49    0.87 
  -8  -9   0    0.43    0.69 
  -8  -9   0    1.08    0.88 
   8   9   0    0.89    0.66 
   8   9   0    0.38    0.56 
   8   9   0    0.10    0.69 
  -9  -9   0    9.97    2.17 
  -9  -9   0   10.07    2.08 
   9   9   0   15.02    2.20 
   9   9   0    9.42    1.95 
   9   9   0   10.33    1.86 
 -10  -9   0   13.13    2.50 
 -10  -9   0   10.26    2.21 
  10   9   0    7.70    1.76 
  10   9   0   11.29    2.09 
  10   9   0   12.09    2.08 
  10 -10   0    1.99    1.35 
  10 -10   0    0.64    0.78 
 -10  10   0    0.16    0.97 
 -10  10   0   -0.46    0.78 
   9 -10   0    1.94    1.06 
   9 -10   0    3.35    1.48 
  -9  10   0    1.45    1.11 
  -9  10   0    0.67    0.94 
   8 -10   0    0.47    0.89 
   8 -10   0   -0.11    0.53 
  -8  10   0   -0.19    0.52 
  -8  10   0    1.41    0.87 
   7 -10   0    6.67    1.63 
   7 -10   0   10.61    1.95 
  -7  10   0    8.98    1.75 
  -7  10   0    4.31    1.29 
   6 -10   0    1.71    0.91 
   6 -10   0    2.97    1.04 
   6 -10   0    1.79    0.97 
   6 -10   0    1.59    0.89 
  -6  10   0    3.45    1.07 
  -6  10   0    3.06    1.13 
   5 -10   0   38.30    2.96 
   5 -10   0   41.39    3.20 
   5 -10   0   47.50    2.76 
   5 -10   0   37.26    3.52 
  -5  10   0   42.35    3.00 
  -5  10   0   39.85    2.89 
  -5  10   0   46.46    2.67 
   4 -10   0   15.28    2.00 
   4 -10   0   13.94    1.99 
   4 -10   0   16.06    2.17 
   4 -10   0   18.16    1.83 
  -4  10   0   16.79    1.79 
  -4  10   0   11.75    1.77 
  -4  10   0   14.14    1.95 
   3 -10   0    0.03    0.49 
   3 -10   0    0.42    0.66 
   3 -10   0    0.35    0.42 
   3 -10   0    0.47    0.53 
   3 -10   0   -0.04    0.31 
  -3  10   0    0.47    0.38 
  -3  10   0    0.45    0.44 
  -3  10   0    0.76    0.54 
  -3  10   0   -0.21    0.40 
   2 -10   0    6.10    1.06 
   2 -10   0    6.90    1.19 
   2 -10   0    4.40    1.03 
   2 -10   0    6.85    1.22 
   2 -10   0    4.58    1.01 
   2 -10   0    5.92    1.01 
   2 -10   0    5.22    1.13 
  -2  10   0    6.37    0.97 
  -2  10   0    5.10    1.03 
  -2  10   0    7.44    1.24 
  -2  10   0    6.19    1.08 
   1 -10   0    3.22    0.86 
   1 -10   0    7.41    1.23 
   1 -10   0    4.62    0.92 
   1 -10   0    4.82    0.92 
   1 -10   0    6.14    1.10 
   1 -10   0    5.87    1.13 
   1 -10   0    5.77    1.14 
  -1  10   0    3.96    0.78 
  -1  10   0    6.20    1.10 
  -1  10   0    6.73    1.15 
  -1  10   0    3.70    0.86 
  -1  10   0    4.74    0.86 
   0 -10   0    9.32    1.44 
   0 -10   0    8.35    1.33 
   0 -10   0    9.63    1.29 
   0 -10   0   10.45    1.38 
   0 -10   0   10.40    1.52 
   0 -10   0    7.64    1.16 
   0 -10   0    8.31    1.25 
   0  10   0    8.56    1.18 
   0  10   0    8.35    1.19 
   0  10   0   11.33    1.35 
   0  10   0   10.59    1.29 
   0  10   0    8.18    1.26 
  -1 -10   0   29.63    2.20 
  -1 -10   0   32.95    2.31 
  -1 -10   0   29.58    2.04 
  -1 -10   0   33.82    2.08 
  -1 -10   0   34.93    2.07 
  -1 -10   0   28.23    2.10 
  -1 -10   0   27.97    2.23 
   1  10   0   35.94    1.99 
   1  10   0   37.78    2.31 
   1  10   0   34.59    2.05 
   1  10   0   33.71    2.14 
  -2 -10   0    3.05    0.93 
  -2 -10   0    3.24    0.97 
  -2 -10   0    2.20    0.74 
  -2 -10   0    2.17    0.59 
  -2 -10   0    2.88    0.70 
   2  10   0    3.58    0.75 
   2  10   0    2.98    0.62 
   2  10   0    2.53    0.79 
   2  10   0    1.58    0.58 
  -3 -10   0   17.99    2.13 
  -3 -10   0   18.63    1.37 
  -3 -10   0   17.48    2.14 
  -3 -10   0   17.88    2.22 
   3  10   0   15.17    1.83 
   3  10   0   19.82    1.79 
   3  10   0   20.15    2.13 
   3  10   0   16.42    1.12 
  -4 -10   0   13.77    1.91 
  -4 -10   0   14.49    1.99 
  -4 -10   0   15.69    1.44 
  -4 -10   0   12.17    1.87 
   4  10   0   15.00    1.64 
   4  10   0   14.41    1.88 
   4  10   0   13.62    1.80 
  -5 -10   0    9.86    1.79 
  -5 -10   0    9.82    1.71 
  -5 -10   0   11.77    1.88 
   5  10   0    9.26    1.52 
   5  10   0    8.82    1.36 
   5  10   0    8.73    1.56 
  -6 -10   0   13.09    2.00 
  -6 -10   0   11.82    1.96 
  -6 -10   0   11.49    2.00 
   6  10   0   15.37    2.11 
   6  10   0   12.36    1.88 
   6  10   0   13.99    1.78 
  -7 -10   0   -0.37    0.34 
  -7 -10   0    0.39    0.78 
  -7 -10   0   -0.36    0.56 
   7  10   0    1.28    0.82 
   7  10   0    0.33    0.64 
   7  10   0    0.80    0.61 
  -8 -10   0    7.76    1.76 
  -8 -10   0    6.05    1.69 
  -8 -10   0    5.13    1.41 
   8  10   0    6.87    1.59 
   8  10   0    6.30    1.42 
   8  10   0    7.65    1.61 
  -9 -10   0    0.07    0.70 
  -9 -10   0   -1.01    0.70 
   9  10   0    1.00    0.86 
   9  10   0    1.01    0.76 
   9  10   0   -0.10    0.55 
 -10 -10   0    6.98    1.92 
 -10 -10   0    3.59    1.60 
  10  10   0    2.38    1.06 
  10  10   0    5.03    1.49 
  10  10   0    4.36    1.34 
   9 -11   0   -0.11    0.64 
   9 -11   0   -0.14    0.87 
  -9  11   0   -0.54    0.84 
  -9  11   0    0.52    0.98 
   8 -11   0    1.87    1.19 
   8 -11   0    4.36    1.48 
  -8  11   0    3.59    1.29 
  -8  11   0    3.53    1.36 
   7 -11   0    1.38    1.01 
   7 -11   0    0.69    0.88 
  -7  11   0    2.42    1.06 
  -7  11   0    1.59    0.91 
   6 -11   0   20.24    2.66 
   6 -11   0   22.44    2.90 
   6 -11   0   17.02    2.55 
  -6  11   0   18.98    2.49 
  -6  11   0   17.95    2.43 
   5 -11   0   35.04    2.40 
   5 -11   0   32.75    3.27 
   5 -11   0   35.89    3.43 
   5 -11   0   33.31    3.43 
  -5  11   0   32.74    2.32 
  -5  11   0   28.22    2.92 
  -5  11   0   30.50    3.08 
   4 -11   0    0.26    0.50 
   4 -11   0    0.64    0.52 
   4 -11   0    1.19    0.85 
   4 -11   0   -0.04    0.56 
  -4  11   0   -0.20    0.34 
  -4  11   0    0.22    0.51 
  -4  11   0    0.30    0.61 
   3 -11   0    0.32    0.56 
   3 -11   0   -0.22    0.39 
   3 -11   0    0.44    0.41 
   3 -11   0    0.10    0.59 
   3 -11   0    0.22    0.50 
  -3  11   0   -0.17    0.32 
  -3  11   0    0.00    0.35 
  -3  11   0    0.64    0.49 
  -3  11   0    0.13    0.52 
   2 -11   0    1.09    0.61 
   2 -11   0    0.40    0.49 
   2 -11   0   -0.09    0.54 
   2 -11   0    0.23    0.48 
   2 -11   0    1.48    0.65 
   2 -11   0    1.03    0.53 
   2 -11   0    0.28    0.51 
  -2  11   0    0.50    0.42 
  -2  11   0    1.49    0.59 
  -2  11   0    1.34    0.69 
  -2  11   0    1.38    0.62 
   1 -11   0   19.57    1.91 
   1 -11   0   15.69    1.89 
   1 -11   0   16.56    1.88 
   1 -11   0   15.00    1.74 
   1 -11   0   14.86    1.84 
   1 -11   0   16.64    1.93 
   1 -11   0   14.28    1.82 
  -1  11   0   15.01    1.62 
  -1  11   0   11.70    1.49 
  -1  11   0   17.90    1.98 
  -1  11   0   15.82    1.78 
  -1  11   0   18.03    1.93 
  -1  11   0   15.45    1.65 
   0 -11   0    8.77    1.32 
   0 -11   0    8.92    1.39 
   0 -11   0   10.36    1.59 
   0 -11   0    7.38    1.23 
   0 -11   0    7.70    1.29 
   0 -11   0    8.86    1.44 
   0 -11   0    8.13    1.23 
   0  11   0    7.87    1.25 
   0  11   0    9.43    1.41 
   0  11   0    7.51    1.13 
   0  11   0    8.95    1.30 
   0  11   0    7.19    1.17 
  -1 -11   0    0.06    0.39 
  -1 -11   0   -0.33    0.26 
  -1 -11   0   -0.20    0.38 
  -1 -11   0    0.04    0.43 
  -1 -11   0   -0.81    0.32 
  -1 -11   0    0.68    0.55 
  -1 -11   0   -0.04    0.38 
   1  11   0   -0.08    0.28 
   1  11   0   -0.19    0.38 
   1  11   0   -0.20    0.38 
   1  11   0    0.21    0.34 
  -2 -11   0   40.42    2.34 
  -2 -11   0   45.15    2.53 
  -2 -11   0   42.18    3.04 
  -2 -11   0   42.20    2.89 
  -2 -11   0   49.10    3.08 
   2  11   0   43.16    2.30 
   2  11   0   43.97    2.81 
   2  11   0   48.97    2.82 
   2  11   0   43.56    2.52 
  -3 -11   0    3.51    1.05 
  -3 -11   0    2.94    0.72 
  -3 -11   0    1.54    0.81 
  -3 -11   0    1.86    0.84 
   3  11   0    1.90    0.79 
   3  11   0    3.15    0.75 
   3  11   0    1.70    0.78 
  -4 -11   0    9.34    1.63 
  -4 -11   0    8.57    1.28 
  -4 -11   0    9.92    1.80 
  -4 -11   0    5.85    1.41 
   4  11   0    7.46    1.40 
   4  11   0   11.01    1.43 
   4  11   0   10.82    1.67 
  -5 -11   0    3.90    1.21 
  -5 -11   0    6.50    1.50 
  -5 -11   0    5.22    1.39 
   5  11   0    4.07    0.98 
   5  11   0    5.86    1.31 
   5  11   0    5.41    1.31 
  -6 -11   0   -0.38    0.61 
  -6 -11   0    0.44    0.65 
  -6 -11   0   -0.31    0.57 
   6  11   0    0.05    0.55 
   6  11   0   -0.54    0.40 
   6  11   0    0.29    0.58 
  -7 -11   0    2.34    1.21 
  -7 -11   0    2.32    1.01 
  -7 -11   0    2.82    1.13 
   7  11   0    2.74    1.05 
   7  11   0    2.09    1.00 
   7  11   0    3.21    1.19 
  -8 -11   0    0.94    0.76 
  -8 -11   0    0.90    0.95 
  -8 -11   0    2.74    1.18 
   8  11   0    1.34    0.85 
   8  11   0    0.26    0.75 
   8  11   0    1.15    0.95 
  -9 -11   0    3.27    1.32 
  -9 -11   0    2.12    1.23 
   9  11   0    5.82    1.60 
   9  11   0    2.17    1.22 
   9  11   0    2.19    1.06 
 -10 -11   0   -0.15    0.97 
 -10 -11   0   -0.10    0.91 
  10  11   0    0.08    0.82 
  10  11   0   -0.23    0.59 
   9 -12   0    4.94    1.66 
   9 -12   0    0.40    0.80 
  -9  12   0    2.65    1.22 
  -9  12   0    1.91    1.20 
   8 -12   0   -0.25    0.56 
   8 -12   0   -0.03    0.96 
  -8  12   0    0.91    0.94 
  -8  12   0   -0.19    0.86 
   7 -12   0    4.00    1.42 
   7 -12   0    4.27    1.45 
  -7  12   0    5.45    1.48 
  -7  12   0    3.69    1.28 
   6 -12   0    0.62    0.87 
   6 -12   0   -0.90    0.70 
   6 -12   0    0.87    1.00 
  -6  12   0    0.95    0.82 
  -6  12   0    0.50    0.76 
   5 -12   0   12.00    2.01 
   5 -12   0   14.24    2.16 
   5 -12   0   12.52    2.18 
  -5  12   0    8.53    1.64 
  -5  12   0    7.11    1.53 
   4 -12   0   22.90    2.66 
   4 -12   0   14.35    1.81 
   4 -12   0   17.13    2.34 
   4 -12   0   17.84    2.48 
  -4  12   0   17.69    2.29 
  -4  12   0   15.86    2.16 
  -4  12   0   18.80    2.05 
   3 -12   0    4.94    1.34 
   3 -12   0    5.39    1.01 
   3 -12   0    3.41    1.17 
   3 -12   0    5.02    1.09 
   3 -12   0    7.67    1.51 
  -3  12   0    4.49    1.18 
  -3  12   0    6.28    1.22 
  -3  12   0    4.18    1.12 
  -3  12   0    5.07    0.97 
   2 -12   0    1.94    0.81 
   2 -12   0    0.56    0.61 
   2 -12   0    2.53    0.76 
   2 -12   0    2.26    0.89 
   2 -12   0    2.09    0.75 
   2 -12   0    3.43    0.97 
   2 -12   0    1.98    0.85 
  -2  12   0    2.41    0.72 
  -2  12   0    1.00    0.65 
  -2  12   0    4.19    1.03 
  -2  12   0    2.83    0.78 
  -2  12   0    1.76    0.65 
   1 -12   0    1.01    0.60 
   1 -12   0    1.10    0.66 
   1 -12   0    1.10    0.76 
   1 -12   0    1.94    0.73 
   1 -12   0    2.59    0.90 
   1 -12   0    1.38    0.71 
   1 -12   0    1.81    0.81 
  -1  12   0    3.49    0.94 
  -1  12   0    2.92    0.87 
  -1  12   0    2.70    0.73 
  -1  12   0    1.29    0.58 
  -1  12   0    2.90    0.82 
  -1  12   0    2.28    0.83 
  -1  12   0    1.29    0.66 
   0 -12   0   14.97    1.98 
   0 -12   0   14.28    1.84 
   0 -12   0    8.10    1.37 
   0 -12   0   12.74    1.70 
   0 -12   0   12.90    1.78 
   0 -12   0   10.09    1.55 
   0 -12   0   16.15    1.91 
   0  12   0   11.73    1.53 
   0  12   0   15.05    1.76 
   0  12   0   10.89    1.64 
   0  12   0   11.25    1.50 
   0  12   0   12.20    1.53 
   0  12   0   14.68    1.88 
   0  12   0   11.19    1.51 
  -1 -12   0    0.05    0.42 
  -1 -12   0    0.42    0.57 
  -1 -12   0   -0.22    0.45 
  -1 -12   0   -0.14    0.40 
  -1 -12   0   -0.20    0.51 
  -1 -12   0    0.17    0.44 
   1  12   0    0.47    0.44 
   1  12   0    0.47    0.49 
   1  12   0    1.08    0.54 
   1  12   0    0.16    0.40 
   1  12   0    0.25    0.57 
  -2 -12   0    3.39    1.06 
  -2 -12   0    4.58    0.95 
  -2 -12   0    1.30    0.69 
  -2 -12   0    1.54    0.58 
  -2 -12   0    2.31    0.94 
   2  12   0    2.46    0.66 
   2  12   0    2.69    0.85 
   2  12   0    1.57    0.68 
   2  12   0    3.50    0.90 
  -3 -12   0   20.40    2.57 
  -3 -12   0   22.68    2.58 
  -3 -12   0   21.30    1.99 
  -3 -12   0   23.73    2.72 
   3  12   0   19.46    2.28 
   3  12   0   21.78    2.33 
   3  12   0   19.46    1.98 
  -4 -12   0    3.69    1.14 
  -4 -12   0    0.28    0.59 
  -4 -12   0    5.13    1.46 
   4  12   0    4.05    0.92 
   4  12   0    2.59    0.97 
   4  12   0    3.31    1.01 
  -5 -12   0   12.57    2.12 
  -5 -12   0   15.63    2.27 
  -5 -12   0    9.37    1.90 
   5  12   0   15.52    1.87 
   5  12   0   14.96    2.13 
   5  12   0   15.72    2.21 
  -6 -12   0   21.68    2.97 
  -6 -12   0   21.79    2.88 
  -6 -12   0   23.21    2.86 
   6  12   0   20.04    2.55 
   6  12   0   22.18    2.78 
   6  12   0   19.03    2.22 
  -7 -12   0    4.04    1.46 
  -7 -12   0    3.71    1.41 
  -7 -12   0    1.09    0.85 
   7  12   0    1.87    0.86 
   7  12   0    3.67    1.31 
   7  12   0    1.69    1.09 
  -8 -12   0    1.35    1.09 
  -8 -12   0    1.70    1.09 
  -8 -12   0    1.13    1.08 
   8  12   0    0.64    0.81 
   8  12   0    1.21    0.94 
  -9 -12   0    0.02    0.89 
  -9 -12   0   -0.55    0.81 
   9  12   0   -0.92    0.66 
   9  12   0    0.44    0.78 
   8 -13   0    0.82    1.10 
   8 -13   0    0.42    1.12 
  -8  13   0    1.45    0.93 
  -8  13   0    1.10    1.13 
   7 -13   0   -0.39    0.55 
   7 -13   0    0.35    0.88 
  -7  13   0    1.17    0.85 
  -7  13   0   -0.11    0.79 
   6 -13   0    2.09    1.13 
   6 -13   0    1.48    1.11 
   6 -13   0    1.90    1.02 
  -6  13   0    3.66    1.29 
  -6  13   0    4.46    1.36 
   5 -13   0    8.48    1.79 
   5 -13   0    4.12    1.28 
   5 -13   0    6.30    1.63 
  -5  13   0    3.01    1.14 
  -5  13   0    4.81    1.35 
   4 -13   0    2.37    0.94 
   4 -13   0    3.87    1.31 
   4 -13   0    3.34    1.16 
  -4  13   0   -0.20    0.56 
  -4  13   0    1.96    0.87 
  -4  13   0    1.94    0.89 
   3 -13   0   26.08    2.92 
   3 -13   0   21.34    2.59 
   3 -13   0   23.66    2.73 
   3 -13   0   25.55    2.45 
  -3  13   0   21.58    2.54 
  -3  13   0   25.47    2.55 
  -3  13   0   24.76    2.23 
  -3  13   0   27.10    2.77 
   2 -13   0    0.50    0.64 
   2 -13   0    2.13    0.79 
   2 -13   0    1.14    0.73 
   2 -13   0    2.04    0.73 
   2 -13   0    1.57    0.84 
   2 -13   0    0.21    0.72 
  -2  13   0    0.58    0.66 
  -2  13   0    1.03    0.68 
  -2  13   0    0.41    0.54 
  -2  13   0    0.64    0.56 
  -2  13   0   -0.17    0.47 
  -2  13   0    0.48    0.57 
   1 -13   0   15.03    1.87 
   1 -13   0   12.83    1.88 
   1 -13   0   18.21    2.26 
   1 -13   0   14.97    2.04 
   1 -13   0   19.48    2.16 
   1 -13   0   16.24    2.11 
   1 -13   0   17.65    2.16 
  -1  13   0   14.52    1.79 
  -1  13   0   15.54    2.02 
  -1  13   0   16.09    1.96 
  -1  13   0   15.40    1.91 
  -1  13   0   17.21    1.93 
  -1  13   0   16.13    1.80 
  -1  13   0   12.39    1.79 
   0 -13   0   27.40    2.59 
   0 -13   0   21.94    2.56 
   0 -13   0   22.84    2.46 
   0 -13   0   27.02    2.49 
   0 -13   0   26.00    2.69 
   0 -13   0   24.99    2.52 
   0 -13   0   25.02    2.56 
   0  13   0   23.82    2.43 
   0  13   0   26.13    2.43 
   0  13   0   23.92    2.30 
   0  13   0   21.84    2.37 
   0  13   0   22.31    2.46 
   0  13   0   21.77    2.16 
   0  13   0   24.56    2.34 
  -1 -13   0   -0.49    0.46 
  -1 -13   0   -0.38    0.47 
  -1 -13   0    0.20    0.48 
  -1 -13   0    0.35    0.59 
  -1 -13   0   -0.23    0.55 
  -1 -13   0    0.26    0.45 
   1  13   0   -0.29    0.35 
   1  13   0   -0.13    0.48 
   1  13   0   -0.09    0.37 
   1  13   0    0.37    0.49 
   1  13   0    0.02    0.54 
  -2 -13   0    1.37    0.76 
  -2 -13   0    0.93    0.62 
  -2 -13   0   -0.63    0.46 
  -2 -13   0    1.45    0.93 
   2  13   0   -0.05    0.60 
   2  13   0    0.91    0.59 
   2  13   0    0.93    0.53 
  -3 -13   0    1.50    0.88 
  -3 -13   0    1.65    0.84 
  -3 -13   0    1.82    1.02 
   3  13   0    2.39    1.02 
   3  13   0    3.29    0.87 
   3  13   0    2.96    0.93 
  -4 -13   0   12.66    2.08 
  -4 -13   0    8.02    1.69 
  -4 -13   0   15.17    2.35 
   4  13   0   15.73    2.20 
   4  13   0   14.51    2.04 
   4  13   0   13.61    1.72 
  -5 -13   0   11.20    1.97 
  -5 -13   0   11.72    2.17 
  -5 -13   0   12.66    2.32 
   5  13   0    9.84    1.83 
   5  13   0   11.32    1.96 
   5  13   0   12.89    1.74 
  -6 -13   0    0.32    0.87 
  -6 -13   0   -0.25    0.70 
  -6 -13   0    0.04    0.69 
   6  13   0    0.27    0.70 
   6  13   0   -0.21    0.65 
  -7 -13   0   17.05    2.69 
  -7 -13   0   19.61    2.99 
  -7 -13   0   17.50    2.73 
   7  13   0   16.38    2.50 
   7  13   0   21.47    2.94 
  -8 -13   0    8.33    2.04 
  -8 -13   0   11.85    2.41 
  -8 -13   0   10.20    2.20 
   8  13   0    6.97    1.70 
   8  13   0    9.71    2.05 
  -9 -13   0    2.61    1.39 
  -9 -13   0   -0.65    0.56 
   9  13   0    1.50    0.97 
   9  13   0   -0.26    0.65 
   7 -14   0    6.35    1.86 
   7 -14   0    5.14    1.67 
  -7  14   0    7.42    1.91 
  -7  14   0    7.14    1.74 
   6 -14   0    2.14    1.16 
   6 -14   0    2.69    1.17 
  -6  14   0    0.67    0.80 
  -6  14   0    0.61    0.85 
   5 -14   0    2.32    1.06 
   5 -14   0    3.84    1.33 
   5 -14   0    2.34    1.23 
  -5  14   0    1.96    1.04 
  -5  14   0    3.61    1.18 
   4 -14   0    4.88    1.52 
   4 -14   0    5.48    1.48 
   4 -14   0    6.83    1.66 
  -4  14   0    3.75    1.21 
  -4  14   0    4.10    1.29 
   3 -14   0   -0.57    0.53 
   3 -14   0    0.58    0.74 
   3 -14   0    0.62    0.75 
  -3  14   0    0.18    0.59 
  -3  14   0   -0.47    0.56 
  -3  14   0   -0.51    0.46 
  -3  14   0    0.64    0.70 
   2 -14   0   22.81    2.65 
   2 -14   0   22.99    2.42 
   2 -14   0   19.74    2.27 
   2 -14   0   21.01    2.55 
   2 -14   0   22.49    2.68 
   2 -14   0   24.53    2.72 
  -2  14   0   23.36    2.27 
  -2  14   0   18.86    2.34 
  -2  14   0   23.77    2.31 
  -2  14   0   17.65    2.11 
  -2  14   0   15.99    2.16 
  -2  14   0   16.99    2.24 
  -2  14   0   21.15    2.42 
   1 -14   0   13.09    1.83 
   1 -14   0    9.28    1.67 
   1 -14   0    8.43    1.58 
   1 -14   0   11.82    1.74 
   1 -14   0   15.70    2.18 
   1 -14   0   10.46    1.84 
   1 -14   0   17.47    2.25 
  -1  14   0    9.78    1.58 
  -1  14   0   13.10    1.80 
  -1  14   0   11.89    1.67 
  -1  14   0   11.58    1.84 
  -1  14   0   10.81    1.72 
  -1  14   0   13.43    1.80 
  -1  14   0   11.01    1.62 
   0 -14   0    4.99    1.23 
   0 -14   0    8.57    1.65 
   0 -14   0    6.61    1.40 
   0 -14   0    7.85    1.49 
   0 -14   0    7.22    1.47 
   0 -14   0    6.76    1.51 
   0 -14   0    6.28    1.32 
   0  14   0    7.21    1.34 
   0  14   0    8.54    1.49 
   0  14   0    5.89    1.26 
   0  14   0    8.30    1.44 
   0  14   0    8.33    1.52 
   0  14   0    7.48    1.31 
   0  14   0   10.25    1.74 
  -1 -14   0   30.76    3.14 
  -1 -14   0   40.81    2.69 
  -1 -14   0   35.02    3.57 
  -1 -14   0   39.57    2.74 
  -1 -14   0   39.64    2.99 
   1  14   0   36.23    3.43 
   1  14   0   39.14    2.69 
   1  14   0   38.08    2.81 
   1  14   0   38.76    2.58 
   1  14   0   36.50    2.55 
   1  14   0   37.52    2.48 
  -2 -14   0    3.31    1.16 
  -2 -14   0    2.20    0.81 
  -2 -14   0    3.65    1.13 
   2  14   0    1.85    0.77 
   2  14   0    1.58    0.85 
   2  14   0    2.53    0.91 
  -3 -14   0    0.23    0.73 
  -3 -14   0    1.23    0.86 
  -3 -14   0    0.16    0.82 
   3  14   0    0.25    0.61 
   3  14   0    1.72    0.92 
   3  14   0    2.51    0.81 
  -4 -14   0   -0.55    0.54 
  -4 -14   0    0.63    0.91 
  -4 -14   0    0.88    0.88 
   4  14   0   -0.13    0.71 
   4  14   0    0.03    0.61 
   4  14   0    0.90    0.63 
  -5 -14   0    7.80    1.78 
  -5 -14   0   10.83    2.03 
  -5 -14   0    8.47    1.94 
   5  14   0    7.65    1.70 
   5  14   0   10.08    1.89 
  -6 -14   0    5.56    1.64 
  -6 -14   0    5.38    1.66 
  -6 -14   0    8.48    2.05 
   6  14   0    5.21    1.53 
   6  14   0    6.63    1.60 
  -7 -14   0    2.99    1.25 
  -7 -14   0    3.78    1.34 
  -7 -14   0    3.96    1.43 
   7  14   0    2.12    1.05 
   7  14   0    0.47    0.85 
  -8 -14   0    9.75    2.34 
  -8 -14   0   12.88    2.66 
   8  14   0    9.25    2.02 
   8  14   0    7.80    1.88 
   7 -15   0    2.43    1.33 
   7 -15   0    3.80    1.78 
  -7  15   0    3.57    1.63 
  -7  15   0    5.28    1.96 
  -7  15   0    3.15    1.38 
   6 -15   0    3.23    1.45 
   6 -15   0    1.70    1.26 
  -6  15   0    1.43    1.05 
  -6  15   0    0.58    1.00 
  -6  15   0    6.22    1.68 
   5 -15   0    8.84    1.95 
   5 -15   0    4.96    1.59 
   5 -15   0    7.52    1.82 
  -5  15   0    6.13    1.57 
  -5  15   0    8.03    1.81 
  -5  15   0    9.48    1.97 
   4 -15   0    0.04    0.81 
   4 -15   0    0.19    0.74 
   4 -15   0    0.74    0.87 
  -4  15   0    0.40    0.74 
  -4  15   0   -0.82    0.56 
  -4  15   0    0.97    0.78 
   3 -15   0    3.22    1.22 
   3 -15   0    1.50    1.00 
   3 -15   0    2.84    1.10 
  -3  15   0    1.80    0.92 
  -3  15   0    3.62    1.24 
  -3  15   0    2.32    1.02 
  -3  15   0    2.29    0.92 
   2 -15   0    0.62    0.75 
   2 -15   0    0.87    0.83 
   2 -15   0    0.03    0.60 
   2 -15   0    0.83    0.88 
  -2  15   0    0.55    0.72 
  -2  15   0    0.54    0.67 
  -2  15   0   -0.11    0.54 
  -2  15   0    0.27    0.60 
  -2  15   0   -0.07    0.56 
  -2  15   0    0.18    0.59 
   1 -15   0    9.71    1.83 
   1 -15   0   17.05    2.21 
   1 -15   0   11.73    1.85 
   1 -15   0   10.37    1.84 
   1 -15   0   11.65    1.93 
   1 -15   0    9.18    1.80 
   1 -15   0   17.27    2.24 
  -1  15   0   16.69    2.13 
  -1  15   0   13.85    2.04 
  -1  15   0    9.84    1.62 
  -1  15   0   17.05    2.15 
  -1  15   0   14.09    1.90 
  -1  15   0   13.71    1.79 
  -1  15   0   15.60    2.07 
   0 -15   0   22.06    2.57 
   0 -15   0   21.96    2.70 
   0 -15   0   18.22    2.61 
   0 -15   0   21.06    2.42 
   0 -15   0   18.12    2.32 
   0 -15   0   25.16    2.79 
   0 -15   0   24.89    2.67 
   0  15   0   20.85    2.32 
   0  15   0   13.98    2.13 
   0  15   0   17.53    2.23 
   0  15   0   18.16    2.29 
   0  15   0   22.45    2.37 
   0  15   0   20.47    2.27 
   0  15   0   21.81    2.36 
  -1 -15   0    2.99    1.17 
  -1 -15   0    2.56    0.93 
  -1 -15   0    2.54    1.12 
   1  15   0    3.92    1.02 
   1  15   0    2.61    0.85 
   1  15   0    2.43    0.88 
   1  15   0    4.22    1.27 
   1  15   0    2.55    1.00 
  -2 -15   0    0.65    0.76 
  -2 -15   0    3.34    1.27 
  -2 -15   0    2.09    1.02 
   2  15   0    2.65    1.04 
   2  15   0    4.25    1.18 
   2  15   0    3.69    1.13 
   2  15   0    4.65    1.34 
  -3 -15   0    4.50    1.36 
  -3 -15   0    5.64    1.58 
  -3 -15   0    9.37    2.02 
   3  15   0    5.26    1.42 
   3  15   0    6.89    1.50 
  -4 -15   0    0.27    0.88 
  -4 -15   0    3.63    1.35 
  -4 -15   0    3.29    1.26 
   4  15   0    1.74    0.97 
   4  15   0    2.09    1.04 
  -5 -15   0    5.03    1.58 
  -5 -15   0    1.94    1.30 
  -5 -15   0    4.25    1.44 
   5  15   0    3.67    1.23 
   5  15   0    4.44    1.30 
  -6 -15   0    4.24    1.49 
  -6 -15   0    1.28    1.02 
  -6 -15   0    0.20    0.85 
   6  15   0    1.37    0.83 
   6  15   0    1.36    1.07 
  -7 -15   0    3.44    1.45 
  -7 -15   0    2.87    1.52 
  -7 -15   0    3.09    1.29 
   7  15   0    2.91    1.16 
   7  15   0    3.47    1.25 
   6 -16   0    4.55    1.64 
   6 -16   0    5.64    1.97 
  -6  16   0    5.74    1.71 
  -6  16   0    7.51    1.90 
  -6  16   0    5.93    1.71 
   5 -16   0   -0.67    0.77 
   5 -16   0    0.00    0.67 
   5 -16   0   -0.96    0.82 
  -5  16   0   -0.21    0.71 
  -5  16   0    0.55    0.74 
  -5  16   0    0.62    0.83 
   4 -16   0    3.24    1.38 
   4 -16   0    3.69    1.45 
   4 -16   0    6.81    1.80 
  -4  16   0    6.93    1.67 
  -4  16   0    5.61    1.49 
  -4  16   0    3.55    1.23 
   3 -16   0    0.81    0.71 
   3 -16   0    1.96    1.03 
   3 -16   0    1.84    0.96 
  -3  16   0    1.29    0.85 
  -3  16   0    0.52    0.61 
  -3  16   0    1.23    1.00 
  -3  16   0    3.16    1.10 
   2 -16   0    8.88    1.87 
   2 -16   0    7.51    1.73 
   2 -16   0    8.27    1.79 
   2 -16   0    5.85    1.53 
  -2  16   0    9.34    1.75 
  -2  16   0    5.09    1.38 
  -2  16   0    4.28    1.23 
  -2  16   0    8.40    1.71 
  -2  16   0    8.34    1.66 
   1 -16   0    4.13    1.27 
   1 -16   0    6.26    1.56 
   1 -16   0    2.29    1.15 
   1 -16   0    5.22    1.49 
   1 -16   0    4.19    1.51 
   1 -16   0    2.52    1.17 
   1 -16   0    4.12    1.24 
  -1  16   0    3.07    1.06 
  -1  16   0    3.23    1.08 
  -1  16   0    3.52    1.06 
  -1  16   0    2.93    1.12 
  -1  16   0    4.09    1.19 
  -1  16   0    3.27    1.16 
  -1  16   0    3.19    1.01 
   0 -16   0    0.06    0.62 
   0 -16   0    0.59    0.80 
   0 -16   0    2.21    1.08 
   0 -16   0    0.68    0.84 
   0  16   0    1.47    0.74 
   0  16   0    1.01    0.77 
   0  16   0    0.73    0.78 
   0  16   0    0.44    0.69 
   0  16   0    0.60    0.67 
  -1 -16   0   23.90    2.93 
  -1 -16   0   21.83    2.82 
  -1 -16   0   29.05    3.43 
   1  16   0   22.00    3.02 
   1  16   0   24.31    3.07 
   1  16   0   21.66    2.66 
   1  16   0   17.51    2.29 
   1  16   0   20.85    2.62 
  -2 -16   0    1.81    1.08 
  -2 -16   0    2.01    1.05 
  -2 -16   0    2.43    1.15 
   2  16   0    3.61    1.16 
   2  16   0    2.41    1.00 
   2  16   0    2.54    1.21 
  -3 -16   0    4.19    1.43 
  -3 -16   0    0.85    0.99 
  -3 -16   0    1.43    1.11 
   3  16   0    4.67    1.49 
   3  16   0    0.71    0.79 
   3  16   0    2.23    1.14 
  -4 -16   0    0.63    1.07 
  -4 -16   0    2.83    1.26 
  -4 -16   0    1.17    1.03 
   4  16   0    1.97    1.02 
   4  16   0    1.45    0.98 
  -5 -16   0    0.85    1.04 
  -5 -16   0    1.04    1.04 
  -5 -16   0    1.76    1.04 
   5  16   0    0.40    0.92 
   5  16   0   -0.02    0.70 
  -6 -16   0    5.03    1.67 
  -6 -16   0    3.27    1.36 
  -6 -16   0    3.96    1.62 
   6  16   0    4.28    1.47 
   6  16   0    3.61    1.49 
   4 -17   0    4.37    1.50 
   4 -17   0    6.16    1.78 
   4 -17   0    3.10    1.33 
  -4  17   0    3.50    1.32 
  -4  17   0    5.45    1.57 
  -4  17   0    2.99    1.31 
   3 -17   0    1.36    1.15 
   3 -17   0    1.47    1.02 
  -3  17   0    1.02    0.95 
  -3  17   0    0.95    0.88 
  -3  17   0    2.34    1.09 
  -3  17   0    0.90    0.88 
   2 -17   0    2.64    1.27 
   2 -17   0    3.76    1.37 
   2 -17   0    1.09    0.95 
  -2  17   0    1.44    0.88 
  -2  17   0    0.92    0.87 
  -2  17   0    2.72    1.12 
   1 -17   0   12.60    2.22 
   1 -17   0   12.21    2.21 
   1 -17   0   11.92    2.25 
   1 -17   0   11.41    2.08 
  -1  17   0    7.65    1.62 
  -1  17   0   16.42    2.29 
  -1  17   0    9.28    2.03 
  -1  17   0   10.85    1.97 
  -1  17   0   12.00    2.11 
   0 -17   0    9.28    1.93 
   0 -17   0    6.66    1.65 
   0 -17   0   15.45    2.53 
   0 -17   0    9.09    2.02 
   0  17   0    8.94    1.86 
   0  17   0    7.16    1.59 
   0  17   0    7.83    1.68 
   0  17   0    8.15    1.56 
   0  17   0   11.72    2.04 
  -1 -17   0    0.18    0.88 
  -1 -17   0    0.56    0.97 
  -1 -17   0    0.39    0.78 
   1  17   0    0.23    0.70 
   1  17   0    1.61    0.85 
   1  17   0   -0.19    0.60 
   1  17   0   -0.13    0.73 
  -2 -17   0    7.78    1.83 
  -2 -17   0   10.01    2.15 
  -2 -17   0    8.73    1.97 
   2  17   0    8.35    1.84 
   2  17   0    6.22    1.63 
   2  17   0    6.67    1.56 
  -3 -17   0    3.82    1.28 
  -3 -17   0    3.57    1.51 
  -3 -17   0    5.00    1.58 
   3  17   0    1.26    1.08 
   3  17   0    4.97    1.33 
   3  17   0    5.04    1.63 
  -4 -17   0    1.01    1.03 
  -4 -17   0    2.49    1.18 
  -4 -17   0   -0.37    0.85 
   4  17   0    1.15    1.04 
   4  17   0    2.47    1.24 
  -5 -17   0    2.13    1.34 
  -5 -17   0    1.70    1.35 
  -5 -17   0    3.35    1.57 
   5  17   0    1.66    1.13 
   5  17   0    0.80    1.06 
   3 -18   0    4.33    1.57 
   3 -18   0    3.61    1.36 
  -3  18   0    8.13    1.82 
  -3  18   0    7.25    1.83 
  -3  18   0    5.06    1.54 
   2 -18   0    0.43    1.03 
   2 -18   0    3.35    1.35 
  -2  18   0    3.93    1.25 
  -2  18   0    1.44    1.03 
  -2  18   0    1.83    1.14 
   1 -18   0    4.86    1.61 
   1 -18   0    2.87    1.34 
   1 -18   0    2.97    1.26 
  -1  18   0    1.71    1.03 
  -1  18   0    2.53    1.06 
  -1  18   0    3.32    1.21 
   0 -18   0    1.96    1.20 
   0 -18   0   -0.20    0.83 
   0  18   0    0.25    0.74 
   0  18   0    1.33    0.91 
   0  18   0    2.99    1.22 
  -1 -18   0    5.05    1.57 
  -1 -18   0    8.49    2.00 
  -1 -18   0    3.19    1.33 
   1  18   0    4.47    1.52 
   1  18   0    3.60    1.16 
   1  18   0    3.29    1.21 
   1  18   0    5.72    1.57 
  -2 -18   0    1.24    0.86 
  -2 -18   0    0.37    0.93 
  -2 -18   0    0.51    0.99 
   2  18   0    0.02    0.59 
   2  18   0    0.11    0.87 
   2  18   0   -0.04    0.78 
   2  18   0   -0.10    0.69 
  -3 -18   0    5.18    1.57 
  -3 -18   0    5.35    1.92 
  -3 -18   0    6.74    1.79 
   3  18   0    3.60    1.31 
   3  18   0    4.09    1.49 
   3  18   0    6.99    1.67 
   3  18  -1    5.20    1.63 
   3  18  -1    3.60    1.30 
   3  18  -1    4.26    1.29 
  -3 -18   1    7.95    2.03 
  -3 -18   1    6.17    1.79 
   2  18  -1    1.87    1.30 
   2  18  -1    2.36    1.20 
   2  18  -1    1.51    0.94 
   2  18  -1    4.07    1.49 
  -2 -18   1    3.72    1.56 
  -2 -18   1    5.08    1.82 
   1  18  -1    0.40    0.81 
   1  18  -1   -1.59    0.52 
   1  18  -1    0.29    0.91 
  -1 -18   1   -0.44    0.85 
  -1 -18   1    0.38    0.99 
   0  18  -1    0.61    0.67 
   0  18  -1    0.63    0.91 
   0  18  -1    1.35    0.94 
   0 -18   1    3.27    1.32 
   0 -18   1    1.56    1.13 
  -1  18  -1    0.25    0.75 
  -1  18  -1   -0.01    0.81 
  -1  18  -1    0.13    0.77 
   1 -18   1   -0.47    0.78 
   1 -18   1    0.13    0.91 
  -2  18  -1    3.67    1.33 
  -2  18  -1    2.50    1.09 
  -2  18  -1    4.64    1.50 
   2 -18   1    5.09    1.69 
   2 -18   1    2.47    1.21 
   2 -18   1    3.34    1.35 
   3 -18   1    1.28    1.18 
   3 -18   1   -0.18    0.88 
   5  17  -1    2.66    1.11 
   5  17  -1    2.96    1.37 
  -5 -17   1    2.35    1.45 
  -5 -17   1    4.48    1.71 
   4  17  -1    8.61    1.84 
   4  17  -1    7.74    1.80 
   4  17  -1    8.68    2.00 
  -4 -17   1    5.61    1.75 
  -4 -17   1   11.12    2.42 
   3  17  -1    3.27    1.21 
   3  17  -1    2.20    1.21 
   3  17  -1    1.65    1.10 
  -3 -17   1    4.04    1.62 
  -3 -17   1    5.86    1.73 
   2  17  -1    4.17    1.37 
   2  17  -1    2.12    0.97 
   2  17  -1    2.36    1.20 
  -2 -17   1    2.03    1.22 
  -2 -17   1    1.37    1.01 
   1  17  -1    5.40    1.56 
   1  17  -1    6.67    1.40 
   1  17  -1    4.34    1.34 
   1  17  -1    3.73    1.35 
  -1 -17   1    7.24    1.80 
  -1 -17   1    5.07    1.63 
   0  17  -1    0.14    0.65 
   0  17  -1   -0.34    0.61 
   0  17  -1    0.04    0.62 
   0  17  -1   -0.26    0.62 
   0 -17   1    0.68    0.85 
   0 -17   1    1.23    0.89 
   0 -17   1    0.07    0.75 
  -1  17  -1    5.23    1.52 
  -1  17  -1    5.81    1.46 
  -1  17  -1    4.48    1.42 
   1 -17   1    5.30    1.60 
   1 -17   1    0.71    0.85 
   1 -17   1    3.63    1.26 
  -2  17  -1    2.50    1.15 
  -2  17  -1    1.88    0.95 
  -2  17  -1    2.98    1.18 
  -2  17  -1    1.80    0.98 
   2 -17   1    2.80    1.24 
   2 -17   1    1.10    0.97 
   2 -17   1    3.28    1.40 
  -3  17  -1    3.20    1.21 
  -3  17  -1    2.91    1.19 
  -3  17  -1    3.44    1.25 
   3 -17   1    7.16    1.82 
   3 -17   1    2.74    1.31 
  -4  17  -1    0.94    0.89 
  -4  17  -1    2.69    1.24 
  -4  17  -1    1.59    0.98 
   4 -17   1    4.69    1.66 
   4 -17   1    2.23    1.14 
   6  16  -1    2.00    1.16 
   6  16  -1    3.02    1.20 
  -6 -16   1    1.28    1.27 
  -6 -16   1    1.27    1.24 
   5  16  -1    1.04    1.06 
   5  16  -1    2.30    1.04 
  -5 -16   1    0.88    1.09 
  -5 -16   1    2.41    1.37 
   4  16  -1   -0.24    0.70 
   4  16  -1    0.11    0.77 
  -4 -16   1    0.14    0.93 
  -4 -16   1    0.01    0.92 
  -4 -16   1   -0.53    0.71 
   3  16  -1    5.66    1.55 
   3  16  -1    7.03    1.58 
   3  16  -1    8.88    1.97 
  -3 -16   1    8.57    2.03 
  -3 -16   1    7.75    1.86 
  -3 -16   1    7.65    2.00 
   2  16  -1    0.84    0.88 
   2  16  -1    2.18    1.08 
   2  16  -1    2.17    0.97 
  -2 -16   1    3.60    1.43 
  -2 -16   1    2.90    1.26 
  -2 -16   1    1.84    1.00 
   1  16  -1    3.74    1.12 
   1  16  -1    5.28    1.40 
   1  16  -1    4.16    1.40 
   1  16  -1    4.20    1.26 
   1  16  -1    5.14    1.24 
  -1 -16   1    4.46    1.42 
  -1 -16   1    2.27    0.95 
  -1 -16   1    2.84    1.17 
  -1 -16   1    5.05    1.59 
   0  16  -1   11.24    2.00 
   0  16  -1   10.48    1.87 
   0  16  -1   10.15    1.72 
   0  16  -1   12.81    1.97 
   0  16  -1   12.58    1.89 
   0 -16   1    8.08    1.81 
   0 -16   1   15.86    2.44 
   0 -16   1    9.92    1.80 
  -1  16  -1    1.18    0.90 
  -1  16  -1    1.39    0.77 
  -1  16  -1    1.92    0.83 
  -1  16  -1    0.96    0.73 
  -1  16  -1    1.78    0.89 
   1 -16   1    1.57    1.02 
   1 -16   1    1.57    0.95 
   1 -16   1    1.65    0.96 
   1 -16   1    0.32    0.76 
  -2  16  -1    2.22    0.98 
  -2  16  -1    2.51    1.09 
  -2  16  -1    1.87    0.98 
  -2  16  -1    0.89    0.71 
   2 -16   1    1.98    0.99 
   2 -16   1    1.39    0.79 
   2 -16   1    1.07    0.92 
  -3  16  -1    3.96    1.24 
  -3  16  -1    4.54    1.23 
  -3  16  -1    3.46    1.22 
  -3  16  -1    3.08    1.24 
  -3  16  -1    3.57    1.29 
   3 -16   1    3.65    1.45 
   3 -16   1    3.19    1.25 
   3 -16   1    2.38    1.40 
  -4  16  -1    3.31    1.25 
  -4  16  -1    0.40    0.80 
  -4  16  -1    4.36    1.42 
   4 -16   1    2.94    1.37 
   4 -16   1    2.16    1.10 
   4 -16   1    2.82    1.22 
  -5  16  -1    6.67    1.83 
  -5  16  -1    8.77    1.92 
  -5  16  -1   12.28    2.33 
   5 -16   1    7.79    2.00 
   5 -16   1    8.34    1.99 
   5 -16   1    8.67    2.13 
   6 -16   1   -0.62    0.70 
   7  15  -1    0.13    0.68 
   7  15  -1    1.15    1.01 
  -7 -15   1    0.64    0.86 
  -7 -15   1    1.04    1.22 
   6  15  -1    2.23    1.11 
   6  15  -1    3.55    1.38 
  -6 -15   1    3.20    1.57 
  -6 -15   1    3.71    1.49 
   5  15  -1    0.86    0.99 
   5  15  -1    2.04    0.92 
  -5 -15   1    0.54    0.85 
  -5 -15   1   -0.41    0.79 
  -5 -15   1    0.50    0.74 
   4  15  -1   10.90    1.87 
   4  15  -1   12.02    2.13 
  -4 -15   1   13.94    2.40 
  -4 -15   1   13.24    2.51 
  -4 -15   1   13.07    2.33 
   3  15  -1    2.37    1.14 
   3  15  -1    1.45    0.95 
   3  15  -1   -0.09    0.57 
  -3 -15   1    1.59    1.07 
  -3 -15   1    1.45    0.99 
  -3 -15   1    2.96    1.34 
   2  15  -1    8.73    1.58 
   2  15  -1    9.70    1.91 
   2  15  -1    8.50    1.67 
  -2 -15   1   13.75    2.37 
  -2 -15   1    6.94    1.66 
  -2 -15   1    7.14    1.62 
   1  15  -1    9.53    1.57 
   1  15  -1    5.13    1.38 
   1  15  -1    9.80    1.73 
  -1 -15   1   10.85    2.03 
  -1 -15   1    6.43    1.43 
  -1 -15   1    8.28    1.76 
  -1 -15   1    7.85    1.60 
   0  15  -1    0.57    0.61 
   0  15  -1    0.09    0.37 
   0  15  -1    0.62    0.68 
   0  15  -1    1.19    0.69 
   0  15  -1   -0.01    0.57 
   0  15  -1    1.43    0.71 
   0 -15   1    0.35    0.61 
   0 -15   1    0.67    0.72 
   0 -15   1    1.29    0.91 
   0 -15   1    0.36    0.68 
   0 -15   1    0.49    0.68 
  -1  15  -1   14.43    2.02 
  -1  15  -1   16.08    2.15 
  -1  15  -1   18.03    2.23 
  -1  15  -1   16.53    2.28 
  -1  15  -1   13.43    1.79 
  -1  15  -1   13.57    2.11 
  -1  15  -1   17.23    2.04 
   1 -15   1   18.01    2.43 
   1 -15   1   18.24    2.52 
   1 -15   1   21.16    2.78 
   1 -15   1   19.26    2.38 
   1 -15   1   16.66    2.12 
   1 -15   1   19.71    2.41 
  -2  15  -1   10.38    1.82 
  -2  15  -1    7.89    1.56 
  -2  15  -1   10.18    1.86 
  -2  15  -1    8.57    1.61 
  -2  15  -1    5.78    1.25 
   2 -15   1    6.73    1.48 
   2 -15   1    8.58    1.75 
   2 -15   1   10.14    1.90 
   2 -15   1   10.25    1.88 
  -3  15  -1   -0.15    0.62 
  -3  15  -1    0.85    0.69 
  -3  15  -1    0.23    0.60 
   3 -15   1   -0.52    0.61 
   3 -15   1    0.63    0.71 
   3 -15   1   -0.94    0.58 
  -4  15  -1    1.80    1.02 
  -4  15  -1    0.44    0.82 
   4 -15   1    1.89    1.11 
   4 -15   1    3.40    1.27 
   4 -15   1    1.88    1.10 
  -5  15  -1    0.36    0.56 
  -5  15  -1   -0.31    0.72 
   5 -15   1    1.99    1.10 
   5 -15   1    0.56    0.99 
   5 -15   1    0.27    0.87 
  -6  15  -1    6.66    1.72 
  -6  15  -1    9.24    2.02 
   6 -15   1    5.91    1.83 
   6 -15   1   13.14    2.45 
   6 -15   1    6.59    1.86 
   8  14  -1    4.17    1.43 
   8  14  -1    8.38    1.98 
  -8 -14   1    6.05    1.93 
  -8 -14   1    5.60    1.75 
   7  14  -1    9.72    2.03 
   7  14  -1    2.58    1.20 
  -7 -14   1    4.07    1.54 
  -7 -14   1    6.63    2.05 
   6  14  -1    0.18    0.84 
   6  14  -1    3.89    1.23 
  -6 -14   1    2.12    1.28 
  -6 -14   1    1.50    0.95 
  -6 -14   1    2.84    1.32 
   5  14  -1   13.34    2.16 
   5  14  -1   11.21    1.95 
  -5 -14   1    3.62    1.48 
  -5 -14   1   10.49    2.04 
  -5 -14   1    6.90    1.73 
   4  14  -1    0.32    0.62 
   4  14  -1    4.12    1.21 
  -4 -14   1    2.47    1.07 
  -4 -14   1    1.22    1.04 
  -4 -14   1    0.38    0.79 
   3  14  -1    5.24    1.32 
   3  14  -1    3.36    1.13 
  -3 -14   1    4.31    1.36 
  -3 -14   1    3.59    1.31 
  -3 -14   1    3.45    1.28 
   2  14  -1    7.47    1.55 
   2  14  -1    5.62    1.47 
   2  14  -1    7.10    1.43 
   2  14  -1    3.99    1.06 
  -2 -14   1    4.00    1.36 
  -2 -14   1    5.84    1.44 
  -2 -14   1    5.07    1.16 
  -2 -14   1    5.23    1.36 
   1  14  -1    1.74    0.83 
   1  14  -1    1.06    0.75 
   1  14  -1    0.13    0.59 
   1  14  -1    0.96    0.58 
   1  14  -1    2.36    0.86 
  -1 -14   1    1.52    0.85 
  -1 -14   1    1.95    0.95 
  -1 -14   1    3.19    1.08 
  -1 -14   1    1.92    0.82 
   0  14  -1    6.61    1.25 
   0  14  -1    5.80    1.28 
   0  14  -1    9.12    1.71 
   0  14  -1    9.21    1.64 
   0  14  -1    7.68    1.30 
   0  14  -1    6.89    1.27 
   0 -14   1    7.33    1.38 
   0 -14   1    6.56    1.56 
   0 -14   1    4.62    1.16 
   0 -14   1    8.09    1.56 
   0 -14   1    9.40    1.73 
   0 -14   1   10.63    1.68 
  -1  14  -1    4.49    1.11 
  -1  14  -1    6.16    1.38 
  -1  14  -1    5.94    1.14 
  -1  14  -1    4.12    1.03 
  -1  14  -1    6.94    1.36 
  -1  14  -1    5.34    1.33 
  -1  14  -1    6.08    1.24 
   1 -14   1    5.26    1.24 
   1 -14   1    6.28    1.40 
   1 -14   1    5.43    1.21 
   1 -14   1    5.65    1.27 
   1 -14   1    5.92    1.48 
   1 -14   1    6.04    1.53 
   1 -14   1    4.27    1.24 
  -2  14  -1    9.21    1.47 
  -2  14  -1   10.37    1.82 
  -2  14  -1    9.46    1.68 
  -2  14  -1    8.59    1.34 
  -2  14  -1   11.83    1.85 
  -2  14  -1   10.48    1.57 
   2 -14   1    5.99    1.42 
   2 -14   1    9.05    1.74 
   2 -14   1   10.63    1.62 
   2 -14   1   12.72    2.05 
   2 -14   1   10.85    1.92 
  -3  14  -1    8.29    1.55 
  -3  14  -1    8.87    1.64 
   3 -14   1    7.41    1.59 
   3 -14   1    7.84    1.62 
   3 -14   1    7.49    1.71 
  -4  14  -1    0.55    0.80 
  -4  14  -1   -0.17    0.65 
  -4  14  -1   -0.32    0.62 
   4 -14   1   -0.06    0.75 
   4 -14   1    1.18    0.81 
   4 -14   1    0.93    0.80 
  -5  14  -1    2.48    1.06 
  -5  14  -1    1.49    0.89 
   5 -14   1    5.08    1.51 
   5 -14   1    2.39    1.17 
   5 -14   1    0.67    0.68 
  -6  14  -1    0.42    0.76 
  -6  14  -1   -0.22    0.73 
   6 -14   1    0.62    1.00 
   6 -14   1    0.05    0.74 
   6 -14   1   -0.22    0.89 
  -7  14  -1    5.99    1.72 
  -7  14  -1    2.98    1.31 
   7 -14   1    4.41    1.74 
   7 -14   1    3.44    1.40 
   8  13  -1    1.32    1.04 
   8  13  -1    2.17    1.18 
  -8 -13   1    1.49    1.24 
  -8 -13   1    3.01    1.44 
   7  13  -1    2.47    1.07 
   7  13  -1    3.28    1.30 
  -7 -13   1    5.18    1.65 
  -7 -13   1    3.04    1.29 
   6  13  -1    8.82    1.77 
   6  13  -1    5.75    1.55 
  -6 -13   1    9.51    2.03 
  -6 -13   1    6.53    1.74 
  -6 -13   1    9.49    2.09 
   5  13  -1   -0.07    0.45 
   5  13  -1    0.65    0.70 
  -5 -13   1   -0.13    0.45 
  -5 -13   1    0.01    0.75 
  -5 -13   1    0.61    0.76 
   4  13  -1   17.16    2.37 
   4  13  -1   15.71    2.12 
   4  13  -1   17.84    2.19 
  -4 -13   1   18.41    2.52 
  -4 -13   1   14.04    2.19 
  -4 -13   1   16.76    2.49 
   3  13  -1    5.11    1.03 
   3  13  -1    5.71    1.30 
   3  13  -1    8.06    1.58 
  -3 -13   1    6.60    1.54 
  -3 -13   1    7.24    1.66 
  -3 -13   1    7.09    1.58 
  -3 -13   1    6.22    1.19 
   2  13  -1    1.24    0.76 
   2  13  -1    1.74    0.81 
   2  13  -1    1.71    0.77 
   2  13  -1    1.73    0.66 
  -2 -13   1    2.15    0.92 
  -2 -13   1    1.62    0.78 
  -2 -13   1    1.40    0.69 
  -2 -13   1    2.58    1.04 
   1  13  -1    1.37    0.73 
   1  13  -1    1.70    0.64 
   1  13  -1    1.68    0.77 
   1  13  -1    1.48    0.68 
   1  13  -1    1.00    0.64 
  -1 -13   1    1.77    0.87 
  -1 -13   1    1.34    0.65 
  -1 -13   1    2.55    0.96 
  -1 -13   1    1.22    0.77 
  -1 -13   1    1.11    0.74 
   0  13  -1    0.38    0.51 
   0  13  -1    0.79    0.46 
   0  13  -1    0.32    0.46 
   0  13  -1   -0.31    0.32 
   0  13  -1    0.01    0.41 
   0  13  -1   -0.28    0.54 
   0 -13   1    0.37    0.54 
   0 -13   1    0.42    0.72 
   0 -13   1   -0.23    0.46 
   0 -13   1    0.29    0.52 
   0 -13   1    0.62    0.60 
   0 -13   1    0.09    0.60 
   0 -13   1    0.25    0.55 
  -1  13  -1    7.26    1.23 
  -1  13  -1    5.57    1.28 
  -1  13  -1    4.97    1.03 
  -1  13  -1    5.69    1.22 
  -1  13  -1    3.89    1.04 
  -1  13  -1    3.53    1.06 
   1 -13   1    4.00    1.07 
   1 -13   1    4.63    1.15 
   1 -13   1    5.41    1.26 
   1 -13   1    8.16    1.37 
   1 -13   1    4.82    1.25 
   1 -13   1    4.32    1.20 
   1 -13   1    5.57    1.28 
  -2  13  -1   37.70    2.75 
  -2  13  -1   39.14    2.81 
  -2  13  -1   37.24    2.50 
  -2  13  -1   38.37    2.81 
  -2  13  -1   38.82    2.42 
   2 -13   1   37.18    2.52 
   2 -13   1   39.30    2.97 
   2 -13   1   39.80    2.92 
   2 -13   1   36.17    2.69 
   2 -13   1   37.52    3.51 
  -3  13  -1   -0.20    0.40 
  -3  13  -1    0.67    0.64 
  -3  13  -1    0.83    0.67 
   3 -13   1   -0.06    0.67 
   3 -13   1    0.49    0.73 
   3 -13   1    0.06    0.47 
  -4  13  -1    5.78    1.33 
  -4  13  -1    6.81    1.51 
  -4  13  -1    3.69    1.17 
   4 -13   1    7.59    1.61 
   4 -13   1    4.05    1.32 
   4 -13   1    4.19    1.38 
  -5  13  -1    0.72    0.79 
  -5  13  -1    3.24    1.15 
   5 -13   1    0.97    0.88 
   5 -13   1    0.37    0.70 
   5 -13   1    1.21    0.90 
  -6  13  -1    2.32    1.08 
  -6  13  -1    3.35    1.14 
   6 -13   1    4.20    1.53 
   6 -13   1    4.92    1.50 
   6 -13   1    2.60    1.30 
  -7  13  -1    2.29    1.16 
  -7  13  -1    3.01    1.29 
   7 -13   1    1.91    1.14 
   7 -13   1    3.19    1.48 
  -8  13  -1    0.95    0.90 
  -8  13  -1    1.61    0.92 
   8 -13   1    0.68    1.16 
   8 -13   1    0.50    0.81 
   9  12  -1   -0.05    0.82 
   9  12  -1    1.36    1.09 
  -9 -12   1   -0.56    0.97 
  -9 -12   1    0.82    0.93 
   8  12  -1    1.96    0.99 
   8  12  -1    1.35    0.81 
  -8 -12   1    1.90    1.12 
  -8 -12   1    3.44    1.49 
   7  12  -1    5.30    1.51 
   7  12  -1    5.78    1.45 
  -7 -12   1    2.29    1.20 
  -7 -12   1    8.45    1.93 
  -7 -12   1    8.18    1.93 
   6  12  -1    1.15    0.78 
   6  12  -1    2.57    0.97 
  -6 -12   1    1.31    0.80 
  -6 -12   1    4.12    1.37 
  -6 -12   1    3.17    1.33 
   5  12  -1   17.17    1.91 
   5  12  -1   18.01    2.31 
   5  12  -1   14.57    2.19 
  -5 -12   1   14.33    2.21 
  -5 -12   1   19.08    2.56 
  -5 -12   1   17.51    2.54 
   4  12  -1   13.36    1.92 
   4  12  -1   12.44    1.55 
   4  12  -1   12.64    1.93 
  -4 -12   1   18.90    2.46 
  -4 -12   1   12.34    2.13 
  -4 -12   1   13.10    2.05 
   3  12  -1   12.94    1.79 
   3  12  -1   12.52    1.47 
   3  12  -1   11.48    1.73 
  -3 -12   1   10.20    1.78 
  -3 -12   1   12.19    1.53 
  -3 -12   1   13.32    2.09 
  -3 -12   1   13.65    2.07 
   2  12  -1    4.03    1.00 
   2  12  -1    5.42    1.00 
   2  12  -1    6.59    0.97 
   2  12  -1    4.30    1.09 
  -2 -12   1    4.08    0.96 
  -2 -12   1    3.17    1.04 
  -2 -12   1    6.05    1.39 
  -2 -12   1    4.43    1.22 
  -2 -12   1    6.31    0.99 
   1  12  -1    0.08    0.39 
   1  12  -1    0.42    0.46 
   1  12  -1    1.38    0.57 
   1  12  -1    0.28    0.43 
   1  12  -1   -0.47    0.42 
  -1 -12   1    0.88    0.65 
  -1 -12   1   -0.16    0.51 
  -1 -12   1    0.31    0.49 
  -1 -12   1    1.16    0.60 
  -1 -12   1    0.41    0.53 
   0  12  -1    1.97    0.88 
   0  12  -1    3.07    0.85 
   0  12  -1    2.54    0.71 
   0  12  -1    1.00    0.64 
   0  12  -1    0.78    0.65 
   0  12  -1    2.41    0.74 
   0 -12   1    3.62    1.04 
   0 -12   1    2.35    0.97 
   0 -12   1    2.06    0.78 
   0 -12   1    3.51    0.92 
   0 -12   1    3.09    0.89 
   0 -12   1    2.69    0.84 
   0 -12   1    2.42    0.86 
  -1  12  -1   10.75    1.43 
  -1  12  -1   11.75    1.48 
  -1  12  -1   13.16    1.62 
  -1  12  -1   12.13    1.73 
  -1  12  -1   14.71    1.92 
   1 -12   1   13.29    1.61 
   1 -12   1   15.69    1.88 
   1 -12   1   15.04    1.89 
   1 -12   1   16.60    2.15 
   1 -12   1   12.08    1.64 
   1 -12   1   12.49    1.86 
   1 -12   1   14.98    1.94 
  -2  12  -1   19.26    1.95 
  -2  12  -1   21.07    2.27 
  -2  12  -1   22.37    2.31 
  -2  12  -1   22.94    2.04 
  -2  12  -1   19.65    2.26 
   2 -12   1   21.18    2.41 
   2 -12   1   18.89    2.20 
   2 -12   1   14.26    2.02 
   2 -12   1   22.43    2.11 
   2 -12   1   23.26    2.55 
  -3  12  -1   65.67    3.86 
  -3  12  -1   67.35    3.25 
  -3  12  -1   55.89    3.61 
  -3  12  -1   68.55    3.32 
  -3  12  -1   68.58    3.77 
   3 -12   1   66.25    4.01 
   3 -12   1   63.41    3.39 
   3 -12   1   65.07    3.99 
   3 -12   1   63.01    3.79 
  -4  12  -1    3.73    1.10 
  -4  12  -1    3.93    1.21 
  -4  12  -1    5.40    1.31 
   4 -12   1    3.53    1.15 
   4 -12   1    4.33    1.28 
   4 -12   1    4.69    1.33 
  -5  12  -1    8.11    1.63 
  -5  12  -1    7.21    1.60 
  -5  12  -1    7.29    1.38 
   5 -12   1    7.89    1.70 
   5 -12   1    6.70    1.60 
   5 -12   1    5.00    1.41 
  -6  12  -1   12.59    2.15 
  -6  12  -1   12.24    2.09 
   6 -12   1   10.16    2.11 
   6 -12   1    8.73    1.84 
   6 -12   1   11.11    2.15 
  -7  12  -1    3.83    1.31 
  -7  12  -1    1.21    0.90 
   7 -12   1   -0.29    0.73 
   7 -12   1    0.53    0.75 
   7 -12   1    4.11    1.42 
  -8  12  -1    3.45    1.33 
  -8  12  -1    1.44    1.17 
   8 -12   1    5.06    1.62 
   8 -12   1    3.80    1.39 
  -9  12  -1    0.37    1.05 
  -9  12  -1    0.93    1.37 
   9 -12   1    0.28    1.28 
   9 -12   1   -0.09    0.81 
   9  11  -1   -0.63    0.68 
   9  11  -1   -0.75    0.71 
  -9 -11   1    0.04    0.84 
  -9 -11   1    0.08    0.72 
   8  11  -1    1.71    1.01 
   8  11  -1    2.53    1.16 
  -8 -11   1    3.45    1.29 
  -8 -11   1    1.98    1.20 
   7  11  -1    7.08    1.37 
   7  11  -1    6.77    1.52 
   7  11  -1    9.94    1.86 
  -7 -11   1    8.89    1.89 
  -7 -11   1    6.77    1.63 
  -7 -11   1   10.83    2.14 
   6  11  -1    3.82    1.18 
   6  11  -1    5.92    1.43 
   6  11  -1    4.85    1.05 
  -6 -11   1    3.01    1.17 
  -6 -11   1    3.32    1.15 
  -6 -11   1    5.04    1.46 
   5  11  -1    0.19    0.42 
   5  11  -1    0.52    0.49 
   5  11  -1    0.48    0.69 
  -5 -11   1    1.30    0.79 
  -5 -11   1    1.42    0.86 
  -5 -11   1    1.56    0.92 
   4  11  -1   24.61    2.59 
   4  11  -1   23.03    2.45 
   4  11  -1   26.60    1.87 
  -4 -11   1   24.97    1.78 
  -4 -11   1   23.21    2.64 
  -4 -11   1   22.88    2.65 
  -4 -11   1   27.50    3.03 
   3  11  -1   56.40    2.96 
   3  11  -1   57.12    3.35 
   3  11  -1   55.73    3.40 
  -3 -11   1   62.35    3.87 
  -3 -11   1   59.19    3.60 
  -3 -11   1   63.26    3.12 
  -3 -11   1   53.09    3.48 
   2  11  -1    0.64    0.48 
   2  11  -1    0.61    0.47 
   2  11  -1    1.11    0.46 
   2  11  -1    0.95    0.64 
  -2 -11   1    0.45    0.42 
  -2 -11   1    0.14    0.61 
  -2 -11   1    0.77    0.67 
  -2 -11   1    2.28    0.72 
  -2 -11   1    0.78    0.56 
   1  11  -1    2.98    0.70 
   1  11  -1    5.14    1.01 
   1  11  -1    3.70    0.92 
   1  11  -1    3.12    0.92 
   1  11  -1    4.24    0.83 
  -1 -11   1    3.00    0.84 
  -1 -11   1    3.75    1.11 
  -1 -11   1    3.91    0.88 
  -1 -11   1    2.69    0.87 
  -1 -11   1    4.61    1.10 
   0  11  -1    4.54    1.03 
   0  11  -1    6.63    1.06 
   0  11  -1    6.84    1.08 
   0  11  -1    3.96    0.91 
   0 -11   1    5.94    1.08 
   0 -11   1    7.50    1.25 
   0 -11   1    5.82    1.10 
   0 -11   1    5.49    1.23 
   0 -11   1    4.65    1.10 
   0 -11   1    3.93    0.98 
   0 -11   1    6.18    1.18 
  -1  11  -1    9.40    1.47 
  -1  11  -1   12.52    1.43 
  -1  11  -1   13.31    1.71 
  -1  11  -1    9.34    1.29 
  -1  11  -1    8.74    1.27 
   1 -11   1   10.51    1.65 
   1 -11   1   10.51    1.53 
   1 -11   1   13.48    1.73 
   1 -11   1   12.08    1.55 
   1 -11   1   11.21    1.44 
   1 -11   1   13.42    1.61 
   1 -11   1   12.97    1.75 
  -2  11  -1   21.77    1.57 
  -2  11  -1   17.60    2.02 
  -2  11  -1   21.93    2.26 
  -2  11  -1   20.10    2.14 
  -2  11  -1   22.88    1.65 
   2 -11   1   18.02    2.19 
   2 -11   1   20.34    1.90 
   2 -11   1   19.88    2.28 
   2 -11   1   20.30    2.20 
   2 -11   1   26.23    1.82 
   2 -11   1   18.61    2.20 
  -3  11  -1    8.44    1.50 
  -3  11  -1    8.98    1.47 
  -3  11  -1    7.49    1.34 
  -3  11  -1    7.41    1.04 
   3 -11   1    8.29    1.23 
   3 -11   1    7.47    1.45 
   3 -11   1    7.33    1.40 
   3 -11   1    9.93    1.61 
  -4  11  -1   61.29    3.66 
  -4  11  -1   68.30    3.61 
  -4  11  -1   64.32    3.79 
   4 -11   1   57.91    3.77 
   4 -11   1   61.93    3.70 
   4 -11   1   65.00    3.30 
   4 -11   1   54.55    3.75 
  -5  11  -1    5.12    1.29 
  -5  11  -1    2.54    0.90 
  -5  11  -1    7.28    1.56 
   5 -11   1    6.44    1.51 
   5 -11   1    3.84    1.26 
   5 -11   1    3.73    1.18 
  -6  11  -1    8.21    1.72 
  -6  11  -1   11.46    1.98 
   6 -11   1   11.11    2.03 
   6 -11   1   11.37    2.13 
   6 -11   1    7.96    1.72 
  -7  11  -1   13.72    2.27 
  -7  11  -1   15.56    2.36 
   7 -11   1   19.43    2.83 
   7 -11   1   17.66    2.56 
   7 -11   1   14.16    2.40 
  -8  11  -1   -0.15    0.69 
  -8  11  -1   -0.12    0.77 
   8 -11   1    0.10    0.94 
   8 -11   1    0.91    0.99 
  -9  11  -1    0.05    0.86 
  -9  11  -1    1.18    1.08 
   9 -11   1    2.31    1.15 
   9 -11   1    0.98    1.11 
  10  10  -1    5.88    1.62 
  10  10  -1    8.08    1.89 
 -10 -10   1    7.33    1.94 
 -10 -10   1    6.61    1.97 
   9  10  -1    0.66    0.84 
   9  10  -1   -0.50    0.69 
   9  10  -1    0.85    1.39 
  -9 -10   1    2.13    1.14 
  -9 -10   1    2.53    1.27 
   8  10  -1    0.92    0.82 
   8  10  -1    1.40    0.83 
   8  10  -1   -0.14    0.59 
  -8 -10   1    0.97    1.00 
  -8 -10   1    3.07    1.22 
   7  10  -1   10.18    1.60 
   7  10  -1    5.64    1.42 
   7  10  -1    9.30    1.74 
  -7 -10   1    4.08    1.23 
  -7 -10   1    6.01    1.59 
  -7 -10   1    5.45    1.44 
   6  10  -1    2.29    0.93 
   6  10  -1    4.29    1.21 
   6  10  -1    3.73    0.96 
  -6 -10   1    2.78    1.15 
  -6 -10   1    2.98    1.12 
  -6 -10   1    2.70    1.10 
   5  10  -1   13.81    2.01 
   5  10  -1   15.68    2.01 
   5  10  -1   15.44    1.74 
  -5 -10   1   14.20    2.12 
  -5 -10   1   16.25    2.23 
  -5 -10   1   20.18    2.48 
  -5 -10   1   16.13    1.86 
   4  10  -1   -0.08    0.37 
   4  10  -1    0.19    0.43 
   4  10  -1    0.94    0.66 
  -4 -10   1    0.06    0.40 
  -4 -10   1    0.38    0.64 
  -4 -10   1    0.74    0.47 
  -4 -10   1    0.59    0.67 
   3  10  -1   26.55    2.40 
   3  10  -1   26.92    1.37 
   3  10  -1   23.32    1.65 
   3  10  -1   22.04    2.30 
  -3 -10   1   22.55    2.55 
  -3 -10   1   26.00    2.60 
  -3 -10   1   23.61    1.72 
  -3 -10   1   27.48    2.72 
   2  10  -1   67.71    3.21 
   2  10  -1   72.65    3.07 
   2  10  -1   68.88    3.67 
   2  10  -1   74.13    3.60 
  -2 -10   1   64.53    3.30 
  -2 -10   1   72.69    3.16 
  -2 -10   1   71.32    3.85 
  -2 -10   1   64.34    3.73 
  -2 -10   1   66.03    3.91 
   1  10  -1    1.50    0.48 
   1  10  -1    1.66    0.69 
   1  10  -1    1.86    0.57 
   1  10  -1    2.26    0.67 
  -1 -10   1    2.56    0.74 
  -1 -10   1    1.06    0.65 
  -1 -10   1    2.95    0.85 
  -1 -10   1    2.42    0.66 
  -1 -10   1    1.84    0.73 
  -1 -10   1    2.04    0.58 
   0  10  -1    3.80    0.79 
   0  10  -1    3.34    0.73 
   0  10  -1    3.96    0.85 
   0  10  -1    2.78    0.80 
   0 -10   1    3.54    0.91 
   0 -10   1    3.84    0.84 
   0 -10   1    4.34    0.91 
   0 -10   1    3.63    0.93 
   0 -10   1    2.06    0.66 
   0 -10   1    3.58    0.86 
   0 -10   1    5.05    0.95 
  -1  10  -1    2.38    0.73 
  -1  10  -1    2.24    0.67 
  -1  10  -1    2.32    0.75 
  -1  10  -1    2.85    0.65 
   1 -10   1    2.84    0.79 
   1 -10   1    2.55    0.76 
   1 -10   1    2.26    0.76 
   1 -10   1    0.90    0.57 
   1 -10   1    2.05    0.71 
   1 -10   1    3.19    0.75 
   1 -10   1    2.78    0.83 
  -2  10  -1    0.29    0.34 
  -2  10  -1    0.24    0.42 
  -2  10  -1    0.15    0.38 
  -2  10  -1    0.17    0.31 
  -2  10  -1    0.09    0.34 
   2 -10   1    0.42    0.44 
   2 -10   1   -0.33    0.38 
   2 -10   1   -0.16    0.30 
   2 -10   1    0.28    0.40 
   2 -10   1   -0.09    0.24 
   2 -10   1    0.33    0.48 
  -3  10  -1    9.62    1.47 
  -3  10  -1    9.34    1.38 
  -3  10  -1    9.04    1.45 
  -3  10  -1   10.14    1.15 
   3 -10   1   10.96    1.69 
   3 -10   1   11.44    1.37 
   3 -10   1    9.87    1.58 
   3 -10   1   11.25    1.54 
  -4  10  -1    2.22    0.87 
  -4  10  -1    1.61    0.67 
  -4  10  -1    0.20    0.42 
   4 -10   1    1.15    0.81 
   4 -10   1    0.52    0.46 
   4 -10   1    0.90    0.62 
   4 -10   1    0.30    0.67 
  -5  10  -1   77.48    4.35 
  -5  10  -1   77.38    4.30 
  -5  10  -1   83.32    4.05 
   5 -10   1   77.99    3.77 
   5 -10   1   78.07    4.38 
   5 -10   1   64.35    4.21 
   5 -10   1   81.21    4.64 
  -6  10  -1   14.35    1.82 
  -6  10  -1   18.97    2.43 
  -6  10  -1   18.74    2.39 
   6 -10   1   15.85    2.34 
   6 -10   1   13.64    2.12 
   6 -10   1   19.99    2.64 
  -7  10  -1    5.28    1.43 
  -7  10  -1    3.37    1.17 
   7 -10   1    1.87    1.12 
   7 -10   1    3.40    1.24 
   7 -10   1    4.19    1.32 
  -8  10  -1   22.06    2.88 
  -8  10  -1   14.52    2.37 
   8 -10   1   17.69    2.72 
   8 -10   1   15.70    2.46 
  -9  10  -1    0.92    0.99 
  -9  10  -1    0.66    0.69 
   9 -10   1   -0.31    0.90 
   9 -10   1    0.80    1.07 
 -10  10  -1    0.10    0.97 
 -10  10  -1    0.58    0.97 
  10 -10   1    1.17    1.12 
  10 -10   1   -0.21    0.97 
  10   9  -1   -0.74    0.60 
  10   9  -1   -0.34    0.63 
  10   9  -1    3.44    1.14 
 -10  -9   1    0.86    0.89 
 -10  -9   1   -0.26    0.79 
   9   9  -1    5.97    1.52 
   9   9  -1    2.27    1.00 
   9   9  -1    2.89    1.19 
  -9  -9   1    0.74    0.96 
  -9  -9   1    1.65    1.20 
   8   9  -1   14.33    1.90 
   8   9  -1   10.58    1.89 
   8   9  -1   10.23    1.84 
  -8  -9   1   12.09    2.14 
  -8  -9   1    9.44    1.95 
   7   9  -1    0.32    0.68 
   7   9  -1   -0.05    0.45 
   7   9  -1    1.01    0.77 
  -7  -9   1    0.36    0.76 
  -7  -9   1    0.15    0.67 
  -7  -9   1   -0.52    0.54 
   6   9  -1    4.92    1.02 
   6   9  -1    4.48    1.15 
   6   9  -1    7.27    1.41 
  -6  -9   1    4.94    1.35 
  -6  -9   1    4.91    1.32 
  -6  -9   1    6.02    1.36 
   5   9  -1    2.32    0.70 
   5   9  -1    2.04    0.81 
   5   9  -1    0.64    0.61 
  -5  -9   1    0.30    0.68 
  -5  -9   1    2.48    0.98 
  -5  -9   1    2.15    0.63 
  -5  -9   1    0.83    0.68 
   4   9  -1   20.65    1.86 
   4   9  -1   14.07    1.82 
   4   9  -1   19.60    2.06 
  -4  -9   1   19.74    1.43 
  -4  -9   1   16.90    2.15 
  -4  -9   1   19.05    2.24 
  -4  -9   1   19.26    2.29 
   3   9  -1    3.75    0.94 
   3   9  -1    4.04    0.53 
   3   9  -1    3.89    0.87 
   3   9  -1    4.73    0.82 
  -3  -9   1    5.00    1.17 
  -3  -9   1    4.25    1.04 
  -3  -9   1    3.45    0.75 
  -3  -9   1    3.63    0.98 
   2   9  -1    3.83    0.61 
   2   9  -1    2.94    0.73 
   2   9  -1    2.82    0.77 
   2   9  -1    4.31    0.76 
  -2  -9   1    3.36    0.96 
  -2  -9   1    3.74    0.65 
  -2  -9   1    2.69    0.65 
  -2  -9   1    3.22    0.96 
  -2  -9   1    3.21    0.87 
   1   9  -1    9.85    1.14 
   1   9  -1   11.19    1.40 
   1   9  -1    7.92    1.10 
  -1  -9   1    8.62    1.35 
  -1  -9   1    7.42    1.08 
  -1  -9   1    7.34    1.21 
  -1  -9   1    9.67    1.22 
  -1  -9   1    8.71    1.08 
  -1  -9   1    9.96    1.48 
   0   9  -1   18.31    1.34 
   0   9  -1   15.34    1.58 
   0   9  -1   17.84    1.33 
   0   9  -1   16.04    1.74 
   0  -9   1   17.84    1.69 
   0  -9   1   17.14    1.72 
   0  -9   1   16.60    1.88 
   0  -9   1   18.33    1.74 
   0  -9   1   17.55    1.89 
   0  -9   1   15.34    1.59 
   0  -9   1   17.11    1.77 
  -1   9  -1   23.56    1.64 
  -1   9  -1   27.47    1.66 
  -1   9  -1   25.87    1.85 
  -1   9  -1   25.00    1.85 
   1  -9   1   24.19    1.73 
   1  -9   1   25.85    1.93 
   1  -9   1   26.33    1.98 
   1  -9   1   27.83    1.95 
   1  -9   1   30.19    1.99 
   1  -9   1   23.36    1.65 
   1  -9   1   26.23    1.80 
  -2   9  -1   69.12    3.47 
  -2   9  -1   72.62    3.59 
  -2   9  -1   66.01    3.47 
  -2   9  -1   74.57    3.21 
   2  -9   1   67.26    3.63 
   2  -9   1   68.22    3.62 
   2  -9   1   69.38    3.48 
   2  -9   1   73.12    3.28 
   2  -9   1   69.79    3.22 
   2  -9   1   64.30    3.57 
  -3   9  -1    0.18    0.32 
  -3   9  -1    0.60    0.54 
  -3   9  -1   -0.15    0.23 
  -3   9  -1    0.70    0.50 
   3  -9   1    0.02    0.39 
   3  -9   1   -0.75    0.24 
   3  -9   1    1.31    0.64 
   3  -9   1   -0.13    0.39 
  -4   9  -1   12.25    0.89 
  -4   9  -1   10.63    1.60 
  -4   9  -1   11.33    1.45 
  -4   9  -1   11.73    1.64 
   4  -9   1   12.98    1.41 
   4  -9   1    9.38    1.54 
   4  -9   1   14.56    1.91 
   4  -9   1    9.65    1.63 
  -5   9  -1   21.31    2.08 
  -5   9  -1   19.71    2.27 
  -5   9  -1   20.91    2.41 
   5  -9   1   22.07    1.69 
   5  -9   1   20.06    2.43 
   5  -9   1   22.22    2.44 
   5  -9   1   20.39    2.42 
  -6   9  -1    8.66    1.61 
  -6   9  -1    7.24    1.27 
  -6   9  -1    6.44    1.40 
   6  -9   1    9.17    1.59 
   6  -9   1    8.67    1.61 
   6  -9   1    5.34    1.42 
   6  -9   1    6.39    1.47 
  -7   9  -1   21.20    2.67 
  -7   9  -1   24.19    2.75 
   7  -9   1   27.74    3.14 
   7  -9   1   25.38    2.95 
  -8   9  -1    2.48    1.11 
  -8   9  -1    0.92    0.87 
   8  -9   1    0.81    0.82 
   8  -9   1    1.94    1.11 
  -9   9  -1    3.12    1.36 
  -9   9  -1    4.90    1.47 
   9  -9   1    1.37    0.90 
   9  -9   1    3.48    1.41 
 -10   9  -1    0.00    0.86 
 -10   9  -1    1.00    1.04 
  10  -9   1   -0.83    0.71 
  10  -9   1    0.79    0.78 
  11   8  -1    0.79    1.01 
  11   8  -1   -0.40    0.75 
 -11  -8   1    1.30    1.27 
 -11  -8   1    0.65    1.13 
  10   8  -1   14.76    2.21 
  10   8  -1    9.84    2.04 
  10   8  -1   14.10    2.22 
 -10  -8   1   14.99    2.62 
 -10  -8   1   15.16    2.60 
   9   8  -1   10.33    1.86 
   9   8  -1    7.36    1.51 
   9   8  -1   11.99    2.09 
  -9  -8   1    8.30    1.88 
  -9  -8   1    6.65    1.57 
   8   8  -1    1.88    0.91 
   8   8  -1    0.81    0.69 
   8   8  -1    2.09    0.93 
  -8  -8   1    3.01    1.13 
  -8  -8   1    2.67    1.09 
   7   8  -1   12.58    1.90 
   7   8  -1    9.57    1.58 
   7   8  -1   10.94    1.64 
  -7  -8   1    8.97    1.62 
  -7  -8   1    7.43    1.59 
  -7  -8   1    9.59    1.81 
   6   8  -1    0.00    0.36 
   6   8  -1    0.05    0.56 
   6   8  -1    0.13    0.47 
  -6  -8   1   -0.36    0.33 
  -6  -8   1    0.63    0.64 
  -6  -8   1   -0.15    0.54 
  -6  -8   1   -0.46    0.36 
   5   8  -1    5.75    1.16 
   5   8  -1    8.16    1.19 
   5   8  -1    4.64    1.04 
  -5  -8   1    4.20    1.09 
  -5  -8   1    4.99    1.22 
  -5  -8   1    8.46    1.50 
  -5  -8   1    7.59    1.01 
   4   8  -1    5.35    0.89 
   4   8  -1    6.96    1.16 
   4   8  -1    4.60    0.99 
  -4  -8   1    4.85    1.12 
  -4  -8   1    4.95    1.17 
  -4  -8   1    7.51    0.99 
  -4  -8   1    6.13    1.17 
   3   8  -1    3.85    0.45 
   3   8  -1    1.68    0.58 
   3   8  -1    3.10    0.64 
   3   8  -1    3.00    0.78 
   3   8  -1    3.03    0.40 
  -3  -8   1    4.22    0.99 
  -3  -8   1    2.51    0.61 
  -3  -8   1    2.22    0.81 
  -3  -8   1    1.33    0.62 
   2   8  -1   94.39    4.31 
   2   8  -1   98.62    3.93 
   2   8  -1  102.74    3.70 
   2   8  -1   87.66    4.13 
  -2  -8   1   98.24    3.75 
  -2  -8   1   94.87    4.45 
  -2  -8   1   95.50    4.45 
  -2  -8   1   89.04    4.50 
  -2  -8   1   95.68    4.04 
   1   8  -1   30.43    1.69 
   1   8  -1   29.78    1.82 
   1   8  -1   34.18    2.03 
  -1  -8   1   31.08    1.71 
  -1  -8   1   29.93    2.08 
  -1  -8   1   27.90    1.72 
  -1  -8   1   28.98    2.07 
  -1  -8   1   30.03    1.83 
  -1  -8   1   30.40    2.04 
   0   8  -1   21.82    1.46 
   0   8  -1   26.88    1.78 
   0   8  -1   21.76    1.55 
   0   8  -1   25.32    1.50 
   0  -8   1   23.49    1.54 
   0  -8   1   24.37    1.60 
   0  -8   1   22.85    1.64 
   0  -8   1   25.16    1.81 
   0  -8   1   24.11    1.59 
   0  -8   1   20.59    1.60 
   0  -8   1   22.42    1.75 
  -1   8  -1   70.22    3.13 
  -1   8  -1   70.82    3.39 
  -1   8  -1   66.03    3.29 
  -1   8  -1   71.63    3.05 
   1  -8   1   69.56    3.36 
   1  -8   1   67.38    3.23 
   1  -8   1   67.57    3.36 
   1  -8   1   66.77    3.18 
   1  -8   1   72.01    3.15 
   1  -8   1   68.25    3.42 
   1  -8   1   68.65    3.47 
  -2   8  -1    2.37    0.53 
  -2   8  -1    2.52    0.68 
  -2   8  -1    2.95    0.75 
   2  -8   1    2.87    0.62 
   2  -8   1    3.14    0.65 
   2  -8   1    3.12    0.81 
   2  -8   1    1.94    0.65 
   2  -8   1    3.10    0.82 
   2  -8   1    3.32    0.78 
  -3   8  -1   31.84    1.61 
  -3   8  -1   30.76    2.08 
  -3   8  -1   28.18    1.89 
  -3   8  -1   28.80    2.08 
   3  -8   1   32.08    2.22 
   3  -8   1   29.78    2.07 
   3  -8   1   30.51    1.79 
   3  -8   1   30.87    2.21 
  -4   8  -1    0.43    0.51 
  -4   8  -1    0.30    0.38 
  -4   8  -1    0.38    0.46 
  -4   8  -1    0.28    0.24 
   4  -8   1    0.37    0.45 
   4  -8   1    0.31    0.53 
   4  -8   1    0.69    0.41 
   4  -8   1   -0.60    0.37 
  -5   8  -1   53.77    3.19 
  -5   8  -1   51.97    3.21 
  -5   8  -1   56.82    2.97 
   5  -8   1   52.68    2.76 
   5  -8   1   52.92    3.23 
   5  -8   1   44.17    3.19 
   5  -8   1   51.88    3.29 
  -6   8  -1   37.23    2.74 
  -6   8  -1   34.50    2.65 
  -6   8  -1   36.09    2.43 
   6  -8   1   35.85    3.35 
   6  -8   1   39.28    2.80 
   6  -8   1   38.00    2.37 
   6  -8   1   43.38    3.03 
  -7   8  -1    0.21    0.45 
  -7   8  -1   -0.99    0.41 
  -7   8  -1   -0.12    0.41 
   7  -8   1   -0.03    0.60 
   7  -8   1   -0.29    0.42 
  -8   8  -1   17.64    2.50 
  -8   8  -1   22.55    2.84 
   8  -8   1   27.64    3.12 
   8  -8   1   17.31    2.53 
  -9   8  -1    6.58    1.69 
  -9   8  -1    6.06    1.60 
   9  -8   1    9.58    1.97 
   9  -8   1   10.55    2.09 
 -10   8  -1    0.47    0.93 
 -10   8  -1    0.54    0.93 
  10  -8   1    1.04    1.02 
  10  -8   1    0.88    0.97 
  11   7  -1    5.70    1.64 
  11   7  -1    5.33    1.55 
 -11  -7   1    7.27    2.02 
 -11  -7   1    6.32    1.81 
  10   7  -1   -0.81    0.58 
  10   7  -1   -0.38    0.78 
  10   7  -1    0.39    0.69 
 -10  -7   1    0.74    0.97 
 -10  -7   1    0.86    0.85 
   9   7  -1    8.66    1.75 
   9   7  -1    7.82    1.52 
   9   7  -1   12.94    1.97 
  -9  -7   1   10.38    2.03 
  -9  -7   1   16.91    2.53 
   8   7  -1    6.51    1.32 
   8   7  -1    4.63    1.22 
   8   7  -1    3.06    1.11 
  -8  -7   1    3.49    1.15 
  -8  -7   1    6.71    1.58 
   7   7  -1    2.44    0.80 
   7   7  -1    2.21    0.97 
   7   7  -1    1.35    0.74 
  -7  -7   1    2.23    0.98 
  -7  -7   1    4.16    1.14 
  -7  -7   1    3.42    1.10 
   6   7  -1    5.00    1.13 
   6   7  -1    2.34    0.82 
   6   7  -1    3.79    0.87 
  -6  -7   1    5.54    0.88 
  -6  -7   1    2.87    0.95 
  -6  -7   1    4.54    1.14 
  -6  -7   1    2.99    1.04 
   5   7  -1   12.91    1.67 
   5   7  -1   10.96    1.50 
   5   7  -1   11.48    1.40 
  -5  -7   1   14.10    1.88 
  -5  -7   1   13.65    1.80 
  -5  -7   1   13.49    1.31 
  -5  -7   1   10.19    1.63 
   4   7  -1   16.93    1.82 
   4   7  -1   18.35    1.37 
   4   7  -1   17.64    1.83 
  -4  -7   1   20.62    1.35 
  -4  -7   1   17.41    1.95 
  -4  -7   1   21.09    2.21 
  -4  -7   1   17.70    1.98 
   3   7  -1   46.17    2.63 
   3   7  -1   53.99    1.89 
   3   7  -1   51.90    2.80 
   3   7  -1   53.43    1.88 
   3   7  -1   50.03    2.42 
  -3  -7   1   50.16    2.87 
  -3  -7   1   50.64    2.44 
  -3  -7   1   47.94    2.84 
  -3  -7   1   46.89    2.86 
   2   7  -1   65.39    2.86 
   2   7  -1   67.92    3.15 
   2   7  -1   61.04    3.16 
   2   7  -1   67.37    2.62 
  -2  -7   1   67.55    3.00 
  -2  -7   1   62.85    3.30 
  -2  -7   1   71.19    2.70 
  -2  -7   1   71.67    3.53 
  -2  -7   1   65.32    3.32 
   1   7  -1   73.78    3.02 
   1   7  -1   73.86    3.19 
   1   7  -1   67.35    3.24 
  -1  -7   1   70.98    3.09 
  -1  -7   1   73.18    3.42 
  -1  -7   1   69.96    3.16 
  -1  -7   1   70.99    3.51 
  -1  -7   1   71.80    2.98 
  -1  -7   1   72.43    3.47 
   0   7  -1    7.79    0.90 
   0   7  -1    8.82    1.13 
   0   7  -1    7.06    0.83 
   0   7  -1   10.07    1.11 
   0  -7   1    8.63    1.00 
   0  -7   1    8.74    1.13 
   0  -7   1    7.57    0.92 
   0  -7   1    8.70    1.21 
   0  -7   1    7.70    1.14 
   0  -7   1    7.46    0.92 
   0  -7   1    8.37    1.07 
  -1   7  -1   14.85    1.02 
  -1   7  -1   14.98    1.46 
  -1   7  -1   17.19    1.60 
  -1   7  -1   13.48    1.06 
   1  -7   1   14.77    1.09 
   1  -7   1   15.23    1.42 
   1  -7   1   15.78    1.18 
   1  -7   1   16.19    1.61 
   1  -7   1   15.53    1.52 
   1  -7   1   14.41    1.54 
   1  -7   1   15.13    1.53 
  -2   7  -1   61.20    3.01 
  -2   7  -1   62.81    3.14 
  -2   7  -1   67.75    2.77 
   2  -7   1   61.42    3.20 
   2  -7   1   62.05    3.06 
   2  -7   1   64.75    2.81 
   2  -7   1   67.26    2.86 
   2  -7   1   64.89    3.26 
   2  -7   1   64.10    3.23 
  -3   7  -1   -0.28    0.22 
  -3   7  -1   -0.07    0.30 
  -3   7  -1    0.04    0.34 
  -3   7  -1    0.15    0.20 
   3  -7   1    0.15    0.28 
   3  -7   1   -0.76    0.27 
   3  -7   1   -0.03    0.28 
   3  -7   1    0.01    0.34 
  -4   7  -1   14.45    1.71 
  -4   7  -1   15.20    1.55 
  -4   7  -1   14.15    1.68 
  -4   7  -1   14.97    0.83 
  -4   7  -1   15.24    0.81 
   4  -7   1   13.93    1.78 
   4  -7   1   16.62    1.49 
   4  -7   1   15.78    1.87 
   4  -7   1   17.34    1.87 
  -5   7  -1    0.35    0.47 
  -5   7  -1   -0.35    0.35 
  -5   7  -1    1.22    0.67 
   5  -7   1    1.14    0.59 
   5  -7   1    0.36    0.42 
   5  -7   1    0.00    0.46 
   5  -7   1    0.85    0.62 
  -6   7  -1   75.39    4.21 
  -6   7  -1   81.46    4.26 
  -6   7  -1   80.78    3.88 
   6  -7   1   80.28    3.75 
   6  -7   1   75.83    4.22 
   6  -7   1   77.42    4.40 
   6  -7   1   80.29    4.38 
  -7   7  -1   51.48    3.50 
  -7   7  -1   56.51    3.17 
  -7   7  -1   50.57    3.34 
   7  -7   1   54.56    3.56 
   7  -7   1   58.98    3.12 
   7  -7   1   53.88    3.65 
  -8   7  -1   -0.53    0.55 
  -8   7  -1    0.48    0.55 
   8  -7   1    0.43    0.78 
   8  -7   1   -0.62    0.57 
  -9   7  -1    8.55    1.78 
  -9   7  -1   11.42    2.13 
   9  -7   1    7.40    1.81 
   9  -7   1    9.88    2.03 
 -10   7  -1    7.54    1.78 
 -10   7  -1    9.62    2.04 
  10  -7   1    9.03    1.98 
  10  -7   1   10.52    2.20 
 -11   7  -1   -1.04    0.74 
 -11   7  -1    0.00    0.69 
  11  -7   1    0.59    1.04 
  11  -7   1    1.03    1.04 
  11   6  -1    1.14    0.92 
  11   6  -1   -0.36    0.71 
 -11  -6   1   -0.76    0.73 
 -11  -6   1   -1.25    0.76 
  10   6  -1    4.84    1.58 
  10   6  -1    6.85    1.63 
  10   6  -1    6.63    1.56 
 -10  -6   1    4.88    1.66 
 -10  -6   1    9.12    1.97 
   9   6  -1    7.20    1.65 
   9   6  -1   11.61    1.86 
   9   6  -1    8.74    1.57 
  -9  -6   1    7.91    1.73 
  -9  -6   1    7.70    1.79 
   8   6  -1    2.32    0.88 
   8   6  -1    4.85    1.15 
   8   6  -1    5.33    1.33 
  -8  -6   1    5.40    1.40 
  -8  -6   1    4.27    1.31 
   7   6  -1    6.21    1.22 
   7   6  -1    8.10    1.53 
   7   6  -1    7.96    1.42 
  -7  -6   1    7.01    1.05 
  -7  -6   1    5.80    1.31 
  -7  -6   1    6.33    1.39 
  -7  -6   1    6.30    1.31 
   6   6  -1    0.52    0.51 
   6   6  -1    0.16    0.33 
   6   6  -1    0.09    0.47 
  -6  -6   1    0.77    0.53 
  -6  -6   1    0.93    0.44 
  -6  -6   1    0.41    0.41 
  -6  -6   1   -0.23    0.26 
   5   6  -1   20.57    1.84 
   5   6  -1   16.04    1.80 
   5   6  -1   21.20    2.06 
  -5  -6   1   18.99    2.09 
  -5  -6   1   20.85    1.36 
  -5  -6   1   18.45    2.02 
  -5  -6   1   19.24    2.11 
   4   6  -1   12.73    1.48 
   4   6  -1   12.92    1.30 
   4   6  -1   12.15    1.47 
  -4  -6   1   13.13    1.62 
  -4  -6   1   13.45    1.22 
  -4  -6   1   13.42    1.58 
  -4  -6   1   15.22    1.74 
   3   6  -1    0.04    0.28 
   3   6  -1    0.35    0.37 
   3   6  -1   -0.19    0.24 
  -3  -6   1    0.07    0.37 
  -3  -6   1    0.08    0.24 
  -3  -6   1    0.00    0.29 
  -3  -6   1    0.15    0.32 
   2   6  -1   18.43    1.30 
   2   6  -1   20.55    1.19 
   2   6  -1   20.01    0.96 
   2   6  -1   19.12    1.39 
   2   6  -1   19.48    0.97 
  -2  -6   1   17.36    1.76 
  -2  -6   1   21.64    1.30 
  -2  -6   1   18.68    1.45 
  -2  -6   1   18.41    0.98 
  -2  -6   1   19.34    1.80 
   1   6  -1   13.75    1.31 
   1   6  -1   14.25    1.03 
   1   6  -1   15.16    0.95 
  -1  -6   1   16.77    1.58 
  -1  -6   1   14.93    1.45 
  -1  -6   1   14.63    1.43 
  -1  -6   1   12.10    0.88 
  -1  -6   1   14.30    1.06 
   0   6  -1   21.23    1.33 
   0   6  -1   18.36    1.19 
   0   6  -1   20.38    1.39 
   0  -6   1   22.41    1.40 
   0  -6   1   22.21    1.42 
   0  -6   1   18.78    1.42 
   0  -6   1   18.43    1.41 
   0  -6   1   21.61    1.32 
   0  -6   1   21.71    1.31 
   0  -6   1   21.61    1.29 
  -1   6  -1   83.30    3.70 
  -1   6  -1   89.97    3.50 
  -1   6  -1   86.26    3.66 
   1  -6   1   84.55    3.70 
   1  -6   1   84.85    3.74 
   1  -6   1   87.71    3.47 
   1  -6   1   85.97    3.81 
   1  -6   1   87.79    3.76 
   1  -6   1   88.27    3.56 
   1  -6   1   90.15    3.61 
  -2   6  -1   44.73    2.47 
  -2   6  -1   50.27    2.14 
  -2   6  -1   48.34    2.41 
   2  -6   1   51.59    2.51 
   2  -6   1   49.75    2.60 
   2  -6   1   48.99    2.24 
   2  -6   1   50.53    2.61 
   2  -6   1   51.40    2.20 
   2  -6   1   50.23    2.62 
  -3   6  -1   50.58    2.51 
  -3   6  -1   49.54    2.69 
  -3   6  -1   51.87    2.05 
  -3   6  -1   48.94    2.63 
   3  -6   1   52.81    2.80 
   3  -6   1   50.28    2.35 
   3  -6   1   51.36    2.81 
   3  -6   1   50.82    2.66 
  -4   6  -1   13.37    1.59 
  -4   6  -1   15.14    0.66 
  -4   6  -1   15.26    0.67 
  -4   6  -1   15.31    1.49 
  -4   6  -1   14.03    1.59 
   4  -6   1   16.55    1.79 
   4  -6   1   14.73    1.39 
   4  -6   1   14.74    1.70 
   4  -6   1   14.05    1.64 
  -5   6  -1    0.08    0.30 
  -5   6  -1    0.42    0.50 
  -5   6  -1   -0.06    0.26 
   5  -6   1    0.12    0.39 
   5  -6   1    0.13    0.42 
   5  -6   1    0.22    0.45 
   5  -6   1   -0.30    0.34 
  -6   6  -1   30.14    2.81 
  -6   6  -1   32.77    2.15 
  -6   6  -1   31.03    2.32 
   6  -6   1   31.44    2.87 
   6  -6   1   30.20    2.83 
   6  -6   1   33.33    2.07 
   6  -6   1   31.71    2.44 
  -7   6  -1    5.25    1.26 
  -7   6  -1    6.24    1.15 
  -7   6  -1    5.36    1.23 
   7  -6   1    2.95    0.97 
   7  -6   1    5.41    1.03 
   7  -6   1    2.97    1.04 
  -8   6  -1   23.35    2.80 
  -8   6  -1   22.96    2.60 
  -8   6  -1   27.53    2.49 
   8  -6   1   23.19    2.78 
   8  -6   1   24.29    2.83 
   8  -6   1   22.34    2.22 
  -9   6  -1    1.02    0.91 
  -9   6  -1    0.43    0.80 
   9  -6   1    0.20    0.77 
   9  -6   1    1.73    1.10 
 -10   6  -1    5.37    1.61 
 -10   6  -1    4.62    1.37 
  10  -6   1    4.94    1.54 
  10  -6   1    3.90    1.43 
 -11   6  -1    6.96    1.74 
 -11   6  -1    4.94    1.58 
  11  -6   1   11.34    2.31 
  11  -6   1    7.33    2.07 
  11   5  -1    1.42    0.85 
  11   5  -1    3.45    1.26 
 -11  -5   1    3.48    1.36 
 -11  -5   1    3.28    1.45 
  10   5  -1    2.71    1.19 
  10   5  -1    2.23    1.04 
 -10  -5   1    3.42    1.37 
 -10  -5   1    1.44    0.95 
   9   5  -1   12.44    1.75 
   9   5  -1   11.52    1.98 
   9   5  -1   14.52    2.11 
  -9  -5   1   13.57    2.17 
  -9  -5   1   10.35    2.02 
   8   5  -1   18.05    2.07 
   8   5  -1   16.81    2.20 
   8   5  -1   19.69    2.23 
  -8  -5   1   19.49    1.89 
  -8  -5   1   22.27    2.67 
  -8  -5   1   24.63    2.75 
   7   5  -1   31.99    2.26 
   7   5  -1   25.21    2.61 
   7   5  -1   29.93    2.18 
  -7  -5   1   27.49    2.79 
  -7  -5   1   26.90    2.84 
  -7  -5   1   30.76    1.94 
   6   5  -1    8.31    1.29 
   6   5  -1    8.36    1.35 
   6   5  -1    8.98    1.30 
  -6  -5   1    8.90    1.46 
  -6  -5   1    5.80    1.14 
  -6  -5   1   10.14    1.44 
  -6  -5   1   10.05    1.15 
   5   5  -1    5.55    0.95 
   5   5  -1    7.28    1.13 
   5   5  -1    6.25    1.09 
  -5  -5   1    5.33    0.81 
  -5  -5   1    6.06    1.10 
  -5  -5   1    7.05    1.15 
  -5  -5   1    5.87    1.15 
   4   5  -1   21.60    1.56 
   4   5  -1   17.35    1.68 
   4   5  -1   18.54    1.31 
  -4  -5   1   15.71    1.70 
  -4  -5   1   18.97    1.19 
  -4  -5   1   14.96    1.66 
  -4  -5   1   17.02    1.73 
   3   5  -1  110.53    4.19 
   3   5  -1  106.84    4.47 
   3   5  -1  101.03    4.38 
  -3  -5   1  104.60    4.10 
  -3  -5   1  112.42    4.63 
  -3  -5   1  109.57    4.61 
  -3  -5   1  105.38    4.63 
   2   5  -1   47.87    2.34 
   2   5  -1   47.37    1.72 
   2   5  -1   47.36    1.71 
   2   5  -1   43.99    1.99 
   2   5  -1   44.64    2.23 
  -2  -5   1   47.16    2.11 
  -2  -5   1   45.31    2.36 
  -2  -5   1   43.15    2.40 
  -2  -5   1   44.78    2.39 
  -2  -5   1   45.99    1.73 
   1   5  -1   87.70    3.45 
   1   5  -1   91.74    3.60 
   1   5  -1   88.91    3.27 
   1   5  -1   87.07    3.35 
  -1  -5   1   84.41    3.72 
  -1  -5   1   85.31    3.65 
  -1  -5   1   82.18    3.21 
  -1  -5   1   84.84    3.63 
  -1  -5   1   86.86    3.45 
   0   5  -1   14.12    1.04 
   0   5  -1   15.88    0.96 
   0   5  -1   13.51    0.98 
   0  -5   1   16.24    1.08 
   0  -5   1   14.98    1.00 
   0  -5   1   15.77    0.97 
   0  -5   1   14.62    1.11 
   0  -5   1   13.83    1.08 
   0  -5   1   13.65    0.96 
   0  -5   1   13.42    1.03 
  -1   5  -1   54.37    2.42 
  -1   5  -1   51.22    2.22 
  -1   5  -1   52.96    2.45 
   1  -5   1   53.59    2.51 
   1  -5   1   52.26    2.22 
   1  -5   1   48.31    2.46 
   1  -5   1   50.14    2.31 
   1  -5   1   56.29    2.33 
   1  -5   1   52.55    2.46 
   1  -5   1   52.07    2.44 
  -2   5  -1  183.03    6.51 
  -2   5  -1  178.08    6.12 
  -2   5  -1  176.44    6.66 
   2  -5   1  180.65    6.74 
   2  -5   1  175.92    6.26 
   2  -5   1  176.55    6.72 
   2  -5   1  182.38    6.58 
   2  -5   1  164.90    6.63 
  -3   5  -1   49.76    2.37 
  -3   5  -1   45.95    2.48 
  -3   5  -1   49.70    2.55 
  -3   5  -1   49.85    1.89 
  -3   5  -1   47.24    1.85 
   3  -5   1   49.77    2.52 
   3  -5   1   50.81    2.24 
   3  -5   1   49.21    2.63 
   3  -5   1   47.91    2.61 
  -4   5  -1   15.68    1.62 
  -4   5  -1   17.37    1.77 
  -4   5  -1   17.28    1.30 
   4  -5   1   17.66    1.74 
   4  -5   1   20.54    1.89 
   4  -5   1   17.01    1.19 
   4  -5   1   21.02    1.95 
  -5   5  -1   26.97    1.96 
  -5   5  -1   27.43    2.06 
  -5   5  -1   28.17    1.84 
   5  -5   1   33.96    2.25 
   5  -5   1   29.57    2.13 
   5  -5   1   32.66    1.82 
   5  -5   1   31.10    2.14 
  -6   5  -1    0.82    0.48 
  -6   5  -1    1.55    0.72 
  -6   5  -1    1.21    0.62 
   6  -5   1    0.49    0.41 
   6  -5   1    0.38    0.55 
   6  -5   1    1.88    0.72 
   6  -5   1    1.50    0.64 
  -7   5  -1   28.44    2.02 
  -7   5  -1   23.93    2.64 
  -7   5  -1   25.43    2.53 
   7  -5   1   28.60    2.85 
   7  -5   1   25.95    2.67 
   7  -5   1   29.34    1.98 
  -8   5  -1    2.40    1.05 
  -8   5  -1    0.72    0.67 
  -8   5  -1    2.48    0.96 
   8  -5   1    1.81    0.90 
   8  -5   1    1.48    0.60 
   8  -5   1    3.80    1.18 
  -9   5  -1    4.22    1.23 
  -9   5  -1    4.07    1.24 
   9  -5   1    3.44    1.14 
   9  -5   1    4.11    1.00 
   9  -5   1    3.67    1.26 
 -10   5  -1    3.47    1.21 
 -10   5  -1    3.43    1.24 
  10  -5   1    5.27    1.54 
  10  -5   1    1.17    1.06 
 -11   5  -1    1.85    1.25 
 -11   5  -1    1.35    1.01 
  11  -5   1    2.74    1.43 
  11  -5   1   -0.98    0.72 
  11   4  -1    0.04    0.57 
  11   4  -1   -0.83    0.60 
 -11  -4   1   -0.11    0.85 
 -11  -4   1   -1.11    0.65 
  10   4  -1   13.87    2.21 
  10   4  -1    9.38    1.86 
 -10  -4   1    7.48    1.98 
 -10  -4   1   10.03    1.94 
   9   4  -1    9.13    1.69 
   9   4  -1    6.38    1.24 
   9   4  -1    3.22    1.16 
  -9  -4   1    6.74    1.62 
  -9  -4   1    6.21    1.49 
   8   4  -1    0.07    0.58 
   8   4  -1   -0.20    0.54 
   8   4  -1    0.93    0.60 
  -8  -4   1   -0.29    0.36 
  -8  -4   1   -0.82    0.41 
  -8  -4   1    0.10    0.68 
   7   4  -1   14.43    1.77 
   7   4  -1   14.38    1.66 
   7   4  -1   16.87    2.00 
  -7  -4   1   13.01    1.47 
  -7  -4   1   14.08    1.98 
  -7  -4   1   13.42    1.87 
   6   4  -1    0.77    0.29 
   6   4  -1    1.33    0.59 
   6   4  -1    0.22    0.39 
   6   4  -1    0.93    0.51 
  -6  -4   1    0.91    0.63 
  -6  -4   1    0.58    0.51 
  -6  -4   1    0.66    0.53 
  -6  -4   1    0.60    0.42 
   5   4  -1   24.13    1.73 
   5   4  -1   26.98    1.78 
   5   4  -1   26.30    1.86 
   5   4  -1   28.03    1.18 
  -5  -4   1   27.22    1.62 
  -5  -4   1   28.06    2.02 
  -5  -4   1   27.99    2.00 
  -5  -4   1   26.18    1.84 
  -5  -4   1   27.16    1.17 
   4   4  -1  133.62    5.11 
   4   4  -1  132.04    4.27 
   4   4  -1  133.01    5.32 
   4   4  -1  129.41    5.22 
  -4  -4   1  129.55    4.90 
  -4  -4   1  130.31    5.34 
  -4  -4   1  129.53    5.45 
  -4  -4   1  131.26    5.43 
  -4  -4   1  129.02    4.25 
  -4  -4   1  128.59    4.26 
   3   4  -1    1.09    0.44 
   3   4  -1    0.73    0.35 
   3   4  -1    1.66    0.42 
  -3  -4   1    0.42    0.40 
  -3  -4   1    2.00    0.57 
  -3  -4   1    1.08    0.46 
  -3  -4   1    1.00    0.34 
   2   4  -1  208.61    7.20 
   2   4  -1  211.01    6.76 
   2   4  -1  209.59    7.44 
   2   4  -1  211.14    6.75 
   2   4  -1  207.10    7.50 
  -2  -4   1  213.02    7.62 
  -2  -4   1  199.04    7.62 
  -2  -4   1  213.14    7.26 
  -2  -4   1  207.23    7.58 
   1   4  -1   20.81    1.26 
   1   4  -1   20.42    1.03 
   1   4  -1   21.13    1.17 
   1   4  -1   23.48    1.14 
   1   4  -1   22.93    1.01 
  -1  -4   1   21.91    1.19 
  -1  -4   1   21.33    1.07 
  -1  -4   1   19.48    1.27 
  -1  -4   1   21.34    1.33 
  -1  -4   1   21.07    1.37 
  -1  -4   1   21.68    1.00 
   0   4  -1   10.90    0.72 
   0   4  -1   11.73    0.86 
   0   4  -1   12.17    0.75 
   0   4  -1   11.07    0.78 
   0  -4   1   12.62    0.92 
   0  -4   1   14.16    0.83 
   0  -4   1   10.73    0.83 
   0  -4   1   10.93    0.82 
   0  -4   1   11.96    0.80 
   0  -4   1   10.78    0.74 
   0  -4   1   10.01    1.03 
  -1   4  -1  223.00    7.45 
  -1   4  -1  207.87    7.68 
  -1   4  -1  223.78    7.45 
  -1   4  -1  228.91    7.69 
   1  -4   1  216.20    7.70 
   1  -4   1  218.33    7.73 
   1  -4   1  220.35    7.77 
   1  -4   1  215.36    7.42 
   1  -4   1  218.91    7.58 
   1  -4   1  221.97    7.50 
   1  -4   1  215.40    7.78 
  -2   4  -1    0.19    0.24 
  -2   4  -1   -0.02    0.13 
  -2   4  -1    0.57    0.34 
  -2   4  -1   -0.07    0.16 
   2  -4   1   -0.02    0.29 
   2  -4   1   -0.06    0.19 
   2  -4   1   -0.06    0.25 
   2  -4   1    0.12    0.21 
  -3   4  -1   85.28    3.58 
  -3   4  -1   85.44    3.71 
  -3   4  -1   89.67    2.97 
  -3   4  -1   85.61    3.76 
  -3   4  -1   90.54    2.98 
   3  -4   1   87.21    3.75 
   3  -4   1   89.66    3.89 
   3  -4   1   91.23    3.45 
   3  -4   1   86.54    3.83 
  -4   4  -1   19.40    1.75 
  -4   4  -1   15.27    1.59 
  -4   4  -1   14.50    1.39 
   4  -4   1   18.54    1.73 
   4  -4   1   20.82    1.89 
   4  -4   1   17.77    1.16 
   4  -4   1   19.00    1.79 
  -5   4  -1    0.62    0.40 
  -5   4  -1    0.46    0.43 
  -5   4  -1    0.66    0.42 
   5  -4   1    0.90    0.46 
   5  -4   1    0.41    0.46 
   5  -4   1    0.78    0.51 
   5  -4   1    0.29    0.31 
  -6   4  -1   26.93    2.06 
  -6   4  -1   24.56    1.77 
  -6   4  -1   26.04    1.91 
   6  -4   1   26.99    2.07 
   6  -4   1   27.69    1.77 
   6  -4   1   24.38    2.43 
  -7   4  -1    7.64    1.22 
  -7   4  -1    7.54    1.38 
  -7   4  -1    7.44    1.30 
   7  -4   1    6.94    1.10 
   7  -4   1    8.54    1.46 
   7  -4   1    7.28    1.37 
  -8   4  -1    8.32    1.66 
  -8   4  -1    7.04    1.25 
  -8   4  -1    8.65    1.56 
   8  -4   1    7.07    1.20 
   8  -4   1   14.03    1.99 
   8  -4   1   10.59    1.77 
  -9   4  -1    7.31    1.46 
  -9   4  -1    9.26    1.78 
  -9   4  -1    6.22    1.36 
   9  -4   1    9.68    1.80 
   9  -4   1    7.96    1.42 
   9  -4   1   10.02    1.72 
 -10   4  -1    1.33    0.96 
 -10   4  -1    3.12    1.42 
  10  -4   1    1.48    1.15 
  10  -4   1    1.30    0.80 
 -11   4  -1    6.73    1.79 
 -11   4  -1    4.52    1.44 
  11  -4   1    6.88    1.72 
  11  -4   1    6.23    1.70 
  11   3  -1    6.09    1.67 
  11   3  -1    5.59    1.58 
 -11  -3   1    2.84    1.35 
  10   3  -1    2.76    1.16 
  10   3  -1    4.76    1.31 
 -10  -3   1    4.05    1.31 
 -10  -3   1    3.65    1.39 
   9   3  -1    0.22    0.47 
   9   3  -1    1.43    0.85 
  -9  -3   1    1.05    0.74 
  -9  -3   1    1.00    0.72 
  -9  -3   1    1.10    0.83 
   8   3  -1   15.27    1.73 
   8   3  -1   12.69    1.83 
   8   3  -1   10.35    1.65 
  -8  -3   1   11.76    1.92 
  -8  -3   1   14.61    1.75 
  -8  -3   1   13.17    1.94 
   7   3  -1    0.16    0.45 
   7   3  -1    0.33    0.40 
   7   3  -1    0.85    0.43 
   7   3  -1    0.17    0.56 
  -7  -3   1    0.22    0.43 
  -7  -3   1    0.67    0.56 
  -7  -3   1    1.53    0.78 
   6   3  -1   27.28    2.08 
   6   3  -1   31.47    1.63 
   6   3  -1   33.43    2.15 
   6   3  -1   28.16    1.89 
  -6  -3   1   34.92    2.40 
  -6  -3   1   31.30    1.90 
  -6  -3   1   33.67    2.25 
   5   3  -1   13.42    0.86 
   5   3  -1   13.29    1.37 
   5   3  -1   14.59    1.55 
   5   3  -1   13.86    1.43 
  -5  -3   1   15.49    1.15 
  -5  -3   1   12.34    1.38 
  -5  -3   1   15.99    1.72 
  -5  -3   1   12.17    1.45 
   4   3  -1   31.75    1.83 
   4   3  -1   31.72    1.84 
   4   3  -1   36.54    2.03 
   4   3  -1   34.23    1.40 
  -4  -3   1   34.76    1.40 
  -4  -3   1   34.22    1.75 
  -4  -3   1   30.40    1.94 
  -4  -3   1   34.49    1.96 
  -4  -3   1   33.90    2.10 
   3   3  -1  361.99   12.80 
   3   3  -1  380.95   12.02 
   3   3  -1  379.71   12.78 
   3   3  -1  377.11   12.63 
  -3  -3   1  378.63   12.54 
  -3  -3   1  368.80   12.91 
  -3  -3   1  370.60   12.01 
  -3  -3   1  375.98   12.02 
  -3  -3   1  380.41   12.88 
  -3  -3   1  364.03   12.93 
   2   3  -1   70.96    2.95 
   2   3  -1   69.43    2.91 
   2   3  -1   71.50    2.75 
  -2  -3   1   69.30    3.01 
  -2  -3   1   75.18    3.06 
  -2  -3   1   70.98    3.04 
  -2  -3   1   72.86    2.77 
   1   3  -1    1.73    0.31 
   1   3  -1    1.89    0.24 
   1   3  -1    2.28    0.42 
   1   3  -1    1.67    0.36 
   1   3  -1    2.61    0.47 
   1   3  -1    1.74    0.28 
  -1  -3   1    2.38    0.41 
  -1  -3   1    2.14    0.45 
  -1  -3   1    1.62    0.42 
  -1  -3   1    1.31    0.41 
  -1  -3   1    1.97    0.31 
  -1  -3   1    1.48    0.22 
   0   3  -1   31.68    1.31 
   0   3  -1   29.77    1.45 
   0   3  -1   31.15    1.37 
   0   3  -1   30.84    1.29 
   0   3  -1   29.57    1.39 
   0   3  -1   31.43    1.34 
   0  -3   1   31.35    1.51 
   0  -3   1   31.06    1.37 
   0  -3   1   32.42    1.32 
   0  -3   1   28.55    1.42 
   0  -3   1   31.18    1.31 
   0  -3   1   32.40    1.35 
   0  -3   1   30.71    1.54 
   0  -3   1   30.42    1.45 
  -1   3  -1  770.43   24.16 
  -1   3  -1  749.02   24.16 
  -1   3  -1  774.47   24.22 
  -1   3  -1  750.23   24.39 
  -1   3  -1  736.02   24.44 
   1  -3   1  739.54   24.31 
   1  -3   1  736.03   24.49 
   1  -3   1  778.50   24.18 
   1  -3   1  731.74   24.47 
   1  -3   1  736.80   24.14 
   1  -3   1  732.80   24.44 
  -2   3  -1  210.32    7.28 
  -2   3  -1  217.47    7.06 
  -2   3  -1  207.96    7.42 
  -2   3  -1  194.11    6.87 
  -2   3  -1  212.79    6.87 
   2  -3   1  200.66    7.42 
   2  -3   1  211.79    7.36 
   2  -3   1  213.64    7.49 
   2  -3   1  214.79    7.08 
  -3   3  -1    0.07    0.25 
  -3   3  -1    0.70    0.32 
  -3   3  -1    0.55    0.33 
   3  -3   1    0.89    0.30 
   3  -3   1    0.09    0.27 
   3  -3   1    1.15    0.44 
   3  -3   1    0.42    0.35 
  -4   3  -1   73.03    3.15 
  -4   3  -1   68.27    3.20 
  -4   3  -1   72.69    3.37 
   4  -3   1   66.35    3.27 
   4  -3   1   74.25    3.40 
   4  -3   1   71.38    2.98 
   4  -3   1   72.02    3.30 
  -5   3  -1   69.31    3.23 
  -5   3  -1   64.56    3.33 
  -5   3  -1   64.08    3.07 
   5  -3   1   65.88    3.32 
   5  -3   1   61.17    3.24 
   5  -3   1   64.95    2.95 
   5  -3   1   65.87    3.28 
  -6   3  -1    8.16    1.32 
  -6   3  -1    9.47    1.32 
  -6   3  -1    8.95    1.23 
   6  -3   1    8.55    1.14 
   6  -3   1    9.78    1.39 
   6  -3   1    7.85    1.34 
  -7   3  -1   22.37    2.42 
  -7   3  -1   22.80    2.17 
  -7   3  -1   25.05    2.34 
   7  -3   1   22.41    2.38 
   7  -3   1   22.69    2.33 
   7  -3   1   22.43    1.73 
  -8   3  -1    2.21    0.99 
  -8   3  -1    1.54    0.68 
  -8   3  -1    2.31    0.88 
   8  -3   1    2.73    0.92 
   8  -3   1    2.86    0.83 
   8  -3   1    2.15    0.96 
  -9   3  -1    5.53    1.30 
  -9   3  -1    4.56    1.33 
  -9   3  -1    5.21    1.22 
   9  -3   1    3.77    1.14 
   9  -3   1    5.43    1.23 
   9  -3   1    5.13    1.44 
 -10   3  -1    6.58    1.50 
 -10   3  -1    4.56    1.55 
  10  -3   1    4.99    1.36 
  10  -3   1    5.11    1.50 
  10  -3   1    5.46    1.37 
 -11   3  -1    1.01    1.04 
 -11   3  -1    1.38    1.01 
  11  -3   1    0.99    0.92 
  11  -3   1    0.33    0.92 
  12   2  -1    1.82    1.21 
  12   2  -1    2.50    1.35 
  11   2  -1    0.39    0.75 
  11   2  -1    1.33    1.04 
 -11  -2   1    2.29    1.22 
  10   2  -1    8.89    1.78 
  10   2  -1    4.74    1.32 
 -10  -2   1    3.10    1.17 
 -10  -2   1    5.66    1.51 
   9   2  -1   29.45    3.05 
   9   2  -1   32.74    3.19 
  -9  -2   1   28.72    2.97 
  -9  -2   1   30.23    2.71 
  -9  -2   1   25.19    2.99 
   8   2  -1    7.60    1.15 
   8   2  -1    8.16    1.48 
   8   2  -1    6.08    1.06 
   8   2  -1    7.20    1.45 
  -8  -2   1    6.98    1.46 
  -8  -2   1    5.99    1.19 
  -8  -2   1    8.88    1.65 
   7   2  -1    2.96    0.90 
   7   2  -1    1.91    0.70 
   7   2  -1    2.42    0.66 
   7   2  -1    3.39    0.72 
  -7  -2   1    1.52    0.78 
  -7  -2   1    3.36    0.93 
  -7  -2   1    2.70    0.74 
   6   2  -1    7.00    1.17 
   6   2  -1    7.34    0.91 
   6   2  -1    6.51    1.15 
   6   2  -1    8.67    1.05 
  -6  -2   1    5.83    1.09 
  -6  -2   1    7.05    1.03 
  -6  -2   1    7.08    1.26 
   5   2  -1   25.53    1.81 
   5   2  -1   25.41    1.73 
   5   2  -1   29.67    1.70 
   5   2  -1   29.94    1.50 
  -5  -2   1   29.94    1.97 
  -5  -2   1   27.85    1.68 
  -5  -2   1   25.69    1.80 
   4   2  -1   26.84    1.67 
   4   2  -1   23.74    1.46 
   4   2  -1   25.09    1.53 
   4   2  -1   27.21    1.28 
  -4  -2   1   26.43    1.47 
  -4  -2   1   23.55    1.50 
  -4  -2   1   28.02    1.77 
  -4  -2   1   27.17    1.65 
   3   2  -1  117.87    4.57 
   3   2  -1  124.08    4.61 
   3   2  -1  116.20    4.68 
   3   2  -1  127.04    4.21 
  -3  -2   1  122.47    4.82 
  -3  -2   1  125.23    4.74 
  -3  -2   1  125.23    4.20 
  -3  -2   1  120.53    4.66 
  -3  -2   1  120.95    4.50 
   2   2  -1  955.87   29.98 
   2   2  -1  931.18   30.14 
   2   2  -1 1000.00   30.33 
   2   2  -1  929.76   30.31 
   2   2  -1  934.34   30.28 
  -2  -2   1  906.96   29.91 
  -2  -2   1  925.79   30.41 
  -2  -2   1  906.31   30.36 
  -2  -2   1  949.47   30.36 
  -2  -2   1  933.04   30.16 
  -2  -2   1  894.71   29.89 
   1   2  -1    0.30    0.20 
   1   2  -1    0.31    0.14 
   1   2  -1    0.66    0.10 
   1   2  -1    0.65    0.25 
   1   2  -1    0.60    0.23 
  -1  -2   1    0.90    0.30 
  -1  -2   1    0.82    0.18 
  -1  -2   1    0.70    0.23 
  -1  -2   1    0.64    0.10 
  -1  -2   1    0.31    0.24 
  -1  -2   1    0.49    0.26 
  -1  -2   1    0.91    0.26 
   0   2  -1    4.46    0.51 
   0   2  -1    3.74    0.38 
   0   2  -1    3.93    0.28 
   0   2  -1    3.98    0.45 
   0   2  -1    3.90    0.41 
   0   2  -1    3.93    0.45 
   0   2  -1    3.83    0.34 
   0   2  -1    3.18    0.43 
   0   2  -1    3.68    0.35 
   0   2  -1    3.74    0.42 
   0  -2   1    3.24    0.42 
   0  -2   1    3.78    0.28 
   0  -2   1    4.51    0.44 
   0  -2   1    3.94    0.30 
   0  -2   1    3.75    0.42 
   0  -2   1    6.20    0.59 
   0  -2   1    4.00    0.39 
  -1   2  -1   50.70    1.99 
  -1   2  -1   47.81    1.93 
  -1   2  -1   49.89    1.80 
  -1   2  -1   49.87    1.82 
  -1   2  -1   51.16    1.78 
  -1   2  -1   48.84    2.03 
   1  -2   1   50.18    1.79 
   1  -2   1   51.52    2.01 
   1  -2   1   50.93    1.81 
   1  -2   1   48.95    1.95 
   1  -2   1   51.06    2.06 
   1  -2   1   46.99    2.03 
   1  -2   1   51.23    2.09 
  -2   2  -1    0.46    0.26 
  -2   2  -1    0.41    0.30 
  -2   2  -1    0.19    0.20 
  -2   2  -1    0.41    0.10 
  -2   2  -1    0.48    0.20 
   2  -2   1    0.26    0.09 
   2  -2   1    0.32    0.24 
   2  -2   1    0.87    0.35 
   2  -2   1    0.23    0.28 
   2  -2   1    0.31    0.18 
  -3   2  -1    0.96    0.33 
  -3   2  -1    0.79    0.33 
  -3   2  -1    1.32    0.43 
   3  -2   1    0.22    0.31 
   3  -2   1    0.44    0.28 
   3  -2   1    0.71    0.28 
   3  -2   1    0.38    0.33 
  -4   2  -1   19.39    1.33 
  -4   2  -1   17.03    1.29 
  -4   2  -1   20.41    1.48 
   4  -2   1   21.15    0.80 
   4  -2   1   21.62    1.46 
   4  -2   1   21.66    1.26 
   4  -2   1   17.68    1.36 
   4  -2   1   21.02    0.79 
   4  -2   1   17.50    1.34 
  -5   2  -1   75.37    3.65 
  -5   2  -1   76.74    3.46 
  -5   2  -1   75.12    3.42 
   5  -2   1   73.36    3.29 
   5  -2   1   76.58    2.67 
   5  -2   1   68.46    3.47 
   5  -2   1   74.59    3.62 
   5  -2   1   78.48    2.64 
  -6   2  -1   43.15    2.47 
  -6   2  -1   41.56    2.65 
  -6   2  -1   40.53    2.43 
   6  -2   1   46.88    1.71 
   6  -2   1   40.48    2.62 
   6  -2   1   45.32    1.73 
   6  -2   1   39.52    2.31 
   6  -2   1   41.26    2.54 
  -7   2  -1    4.89    1.01 
  -7   2  -1    6.43    1.32 
  -7   2  -1    3.26    0.85 
   7  -2   1    3.24    0.91 
   7  -2   1    3.22    0.83 
   7  -2   1    7.44    1.26 
  -8   2  -1    7.65    1.38 
  -8   2  -1   10.85    1.77 
  -8   2  -1   11.14    1.61 
   8  -2   1   12.82    1.68 
   8  -2   1    8.09    1.56 
   8  -2   1   13.69    1.83 
  -9   2  -1   10.31    1.70 
  -9   2  -1   10.11    1.93 
  -9   2  -1   11.76    1.70 
   9  -2   1   12.50    1.83 
   9  -2   1   14.10    2.14 
   9  -2   1   14.66    1.90 
 -10   2  -1    1.86    1.05 
 -10   2  -1    0.19    0.80 
  10  -2   1    1.13    0.82 
  10  -2   1    1.76    0.91 
  10  -2   1    1.00    1.00 
 -11   2  -1    0.83    0.94 
 -11   2  -1    2.74    1.33 
  11  -2   1    1.96    1.20 
  11  -2   1    0.64    0.88 
  12  -2   1    0.06    0.96 
  12   1  -1   -0.91    0.73 
  12   1  -1    1.63    1.13 
 -12  -1   1    2.45    1.65 
  11   1  -1    8.85    1.96 
  11   1  -1    9.89    1.98 
 -11  -1   1   10.37    2.17 
  10   1  -1    8.03    1.68 
  10   1  -1    6.97    1.66 
 -10  -1   1    8.28    1.80 
 -10  -1   1    7.48    1.48 
 -10  -1   1    6.08    1.41 
   9   1  -1    1.54    0.80 
   9   1  -1    0.66    0.62 
  -9  -1   1    1.71    0.83 
  -9  -1   1    1.55    0.84 
  -9  -1   1    2.48    0.98 
   8   1  -1   44.87    3.02 
   8   1  -1   43.69    2.91 
   8   1  -1   44.70    2.42 
   8   1  -1   44.37    2.60 
  -8  -1   1   40.64    2.72 
  -8  -1   1   43.99    2.88 
  -8  -1   1   40.59    3.05 
   7   1  -1   30.21    1.81 
   7   1  -1   28.00    1.84 
   7   1  -1   27.90    2.12 
   7   1  -1   25.49    2.42 
  -7  -1   1   28.95    2.73 
  -7  -1   1   26.32    1.95 
  -7  -1   1   28.92    2.12 
   6   1  -1   11.52    1.45 
   6   1  -1   12.79    1.30 
   6   1  -1   10.22    1.38 
   6   1  -1   10.19    1.12 
  -6  -1   1    8.77    1.26 
  -6  -1   1   10.40    1.46 
  -6  -1   1   11.91    1.37 
   5   1  -1   -0.13    0.23 
   5   1  -1    0.07    0.28 
   5   1  -1    0.06    0.27 
   5   1  -1    0.61    0.34 
  -5  -1   1   -0.53    0.32 
  -5  -1   1    0.56    0.39 
  -5  -1   1    0.02    0.32 
   4   1  -1   68.33    2.83 
   4   1  -1   68.24    3.10 
   4   1  -1   70.09    2.91 
   4   1  -1   68.63    3.13 
  -4  -1   1   76.35    3.07 
  -4  -1   1   72.52    3.13 
  -4  -1   1   67.60    3.22 
   3   1  -1  270.48    9.16 
   3   1  -1  261.67    9.33 
   3   1  -1  268.03    9.01 
   3   1  -1  272.67    9.29 
  -3  -1   1  279.89    9.02 
  -3  -1   1  261.73    9.41 
  -3  -1   1  264.77    9.19 
  -3  -1   1  270.62    9.30 
   2   1  -1   12.29    0.64 
   2   1  -1   12.46    0.78 
   2   1  -1   12.49    0.83 
   2   1  -1   14.66    0.90 
   2   1  -1   12.65    0.78 
  -2  -1   1   13.74    0.66 
  -2  -1   1   14.26    0.82 
  -2  -1   1   13.95    0.90 
  -2  -1   1   10.47    0.78 
   1   1  -1  204.95    6.55 
   1   1  -1  200.41    6.82 
   1   1  -1  195.44    6.78 
   1   1  -1  200.57    6.67 
   1   1  -1  204.44    6.77 
   1   1  -1  204.26    6.80 
   1   1  -1  204.86    6.82 
  -1  -1   1  205.30    6.56 
  -1  -1   1  204.40    6.67 
  -1  -1   1  203.73    6.79 
  -1  -1   1  198.40    6.76 
  -1  -1   1  207.96    6.83 
  -1  -1   1  202.84    6.56 
  -1  -1   1  206.25    6.80 
  -1  -1   1  195.84    6.84 
   0   1  -1  100.66    3.39 
   0   1  -1   99.83    3.36 
   0   1  -1   97.58    3.29 
   0   1  -1   97.72    3.42 
   0  -1   1  103.60    3.46 
   0  -1   1  100.86    3.39 
   0  -1   1  101.71    3.29 
   0  -1   1   98.57    3.36 
   0  -1   1   97.84    3.44 
   0  -1   1   98.49    3.42 
  -1   1  -1    3.24    0.20 
  -1   1  -1    2.98    0.22 
  -1   1  -1    3.13    0.38 
  -1   1  -1    3.13    0.38 
  -1   1  -1    3.27    0.38 
  -1   1  -1    3.33    0.35 
   1  -1   1    2.99    0.21 
   1  -1   1    3.27    0.36 
   1  -1   1    4.09    0.41 
   1  -1   1    2.98    0.37 
   1  -1   1    3.73    0.41 
   1  -1   1    3.19    0.22 
  -2   1  -1  101.85    3.40 
  -2   1  -1  100.96    3.76 
  -2   1  -1  102.55    3.57 
  -2   1  -1   99.83    3.80 
  -2   1  -1  102.61    3.71 
   2  -1   1  100.38    3.40 
   2  -1   1  100.46    3.57 
   2  -1   1  102.64    3.79 
   2  -1   1  100.02    3.75 
   2  -1   1  102.57    3.79 
  -3   1  -1    3.02    0.53 
  -3   1  -1    3.22    0.33 
  -3   1  -1    2.83    0.57 
  -3   1  -1    2.81    0.54 
   3  -1   1    3.59    0.59 
   3  -1   1    3.91    0.38 
   3  -1   1    3.93    0.63 
   3  -1   1    3.84    0.59 
   3  -1   1    4.17    0.54 
  -4   1  -1    6.86    0.97 
  -4   1  -1    4.83    0.48 
  -4   1  -1    4.92    0.75 
  -4   1  -1    3.48    0.62 
   4  -1   1    5.12    0.83 
   4  -1   1    5.27    0.73 
   4  -1   1    5.43    0.49 
   4  -1   1    4.93    0.77 
   4  -1   1    5.60    0.53 
  -5   1  -1   41.03    2.54 
  -5   1  -1   46.87    2.50 
  -5   1  -1   50.31    1.99 
  -5   1  -1   46.77    2.41 
   5  -1   1   50.55    2.66 
   5  -1   1   46.87    2.39 
   5  -1   1   46.06    2.47 
   5  -1   1   50.37    1.96 
   5  -1   1   49.48    2.11 
  -6   1  -1    1.06    0.55 
  -6   1  -1    1.96    0.66 
  -6   1  -1    1.90    0.66 
   6  -1   1    2.35    0.44 
   6  -1   1    0.89    0.47 
   6  -1   1    0.96    0.48 
   6  -1   1    2.07    0.64 
  -7   1  -1   55.36    3.06 
  -7   1  -1   50.79    2.87 
  -7   1  -1   55.63    3.32 
   7  -1   1   51.78    2.96 
   7  -1   1   54.21    2.29 
   7  -1   1   55.77    3.23 
   7  -1   1   46.40    2.81 
  -8   1  -1   20.95    2.16 
  -8   1  -1   23.20    2.32 
  -8   1  -1   20.76    2.50 
   8  -1   1   22.97    2.28 
   8  -1   1   20.30    2.15 
   8  -1   1   22.04    2.51 
  -9   1  -1    0.34    0.68 
  -9   1  -1    0.44    0.61 
  -9   1  -1    2.50    0.88 
   9  -1   1    0.58    0.60 
   9  -1   1    0.11    0.57 
   9  -1   1   -0.04    0.68 
 -10   1  -1    8.88    1.62 
 -10   1  -1    8.42    1.89 
 -10   1  -1   10.91    1.76 
  10  -1   1   12.49    1.88 
  10  -1   1    9.00    1.62 
  10  -1   1    9.24    1.97 
 -11   1  -1    1.30    1.10 
  11  -1   1    0.13    0.63 
  11  -1   1    0.43    0.65 
 -12   1  -1    2.15    1.19 
  12  -1   1    1.40    1.26 
  12   0  -1    0.04    0.88 
  12   0  -1    0.89    1.15 
 -12   0   1   -0.02    1.09 
  11   0  -1   -0.30    0.64 
  11   0  -1    0.84    0.85 
 -11   0   1   -0.05    0.58 
  10   0  -1    5.85    1.57 
  10   0  -1    7.58    1.61 
 -10   0   1    5.79    1.66 
 -10   0   1    6.90    1.46 
   9   0  -1   33.13    2.47 
   9   0  -1   37.07    2.79 
   9   0  -1   28.44    3.11 
  -9   0   1   35.30    2.64 
  -9   0   1   37.89    2.67 
  -9   0   1   36.37    3.60 
   8   0  -1   -0.06    0.57 
   8   0  -1   -0.03    0.51 
   8   0  -1    0.00    0.48 
  -8   0   1    1.02    0.76 
  -8   0   1    0.24    0.51 
  -8   0   1   -0.34    0.45 
   7   0  -1   20.81    2.22 
   7   0  -1   23.84    1.73 
   7   0  -1   19.35    1.35 
   7   0  -1   15.68    1.88 
  -7   0   1   19.80    2.29 
  -7   0   1   20.82    2.04 
  -7   0   1   21.79    2.09 
   6   0  -1   14.75    1.65 
   6   0  -1   16.71    1.58 
   6   0  -1   13.19    1.61 
   6   0  -1   13.76    1.03 
  -6   0   1   14.30    1.74 
  -6   0   1   15.56    1.57 
  -6   0   1   14.60    1.54 
   5   0  -1   50.80    2.57 
   5   0  -1   45.94    2.54 
   5   0  -1   45.38    2.33 
   5   0  -1   48.77    2.15 
  -5   0   1   45.30    2.38 
  -5   0   1   45.78    2.42 
  -5   0   1   49.64    2.70 
   4   0  -1   95.47    3.96 
   4   0  -1   94.06    3.96 
   4   0  -1   98.43    3.80 
   4   0  -1   94.89    3.59 
  -4   0   1   95.23    3.82 
  -4   0   1   93.60    3.87 
  -4   0   1   92.89    4.04 
   3   0  -1   22.88    1.13 
   3   0  -1   22.37    1.33 
   3   0  -1   23.92    1.25 
   3   0  -1   24.44    1.37 
  -3   0   1   22.53    1.23 
  -3   0   1   23.66    1.42 
  -3   0   1   22.41    1.27 
   2   0  -1   22.11    1.17 
   2   0  -1   20.11    0.99 
   2   0  -1   23.25    1.05 
   2   0  -1   22.86    1.14 
   2   0  -1   22.47    1.07 
   2   0  -1   21.54    1.06 
  -2   0   1   22.94    1.08 
  -2   0   1   22.33    1.20 
  -2   0   1   21.87    1.13 
  -2   0   1   21.81    1.01 
  -2   0   1   20.16    1.02 
   1   0  -1  350.14   11.18 
   1   0  -1  338.02   11.18 
   1   0  -1  336.65   11.09 
   1   0  -1  346.39   11.07 
   1   0  -1  341.29   11.10 
   1   0  -1  344.99   11.17 
   1   0  -1  334.85   11.12 
  -1   0   1  341.48   11.13 
  -1   0   1  337.36   11.16 
  -1   0   1  334.31   11.06 
  -1   0   1  344.08   11.08 
  -1   0   1  346.83   11.10 
  -1   0   1  350.26   11.10 
  -1   0   1  336.39   11.17 
  -1   0  -1  215.99    7.05 
  -1   0  -1  217.54    7.16 
  -1   0  -1  210.38    7.06 
  -1   0  -1  213.79    7.15 
  -1   0  -1  213.92    7.08 
  -1   0  -1  222.17    7.16 
  -1   0  -1  218.66    7.20 
   1   0   1  215.30    7.08 
   1   0   1  212.57    7.19 
   1   0   1  219.35    7.07 
   1   0   1  217.89    7.05 
   1   0   1  213.19    7.16 
   1   0   1  209.84    7.15 
   1   0   1  223.10    7.16 
  -2   0  -1  244.52    8.60 
  -2   0  -1  249.34    8.62 
  -2   0  -1  260.92    8.56 
  -2   0  -1  262.48    8.48 
  -2   0  -1  256.99    8.48 
  -2   0  -1  257.74    8.38 
  -2   0  -1  251.56    8.44 
   2   0   1  268.01    8.46 
   2   0   1  250.33    8.46 
   2   0   1  257.19    8.63 
   2   0   1  261.23    8.49 
   2   0   1  268.98    8.40 
   2   0   1  211.02    8.46 
  -3   0  -1   11.94    0.90 
  -3   0  -1   12.03    0.71 
  -3   0  -1   12.60    0.80 
  -3   0  -1   11.32    1.08 
   3   0   1   11.30    1.04 
   3   0   1   10.83    0.69 
   3   0   1   10.23    0.80 
   3   0   1   11.17    0.81 
  -4   0  -1   13.98    1.09 
  -4   0  -1   12.01    0.81 
  -4   0  -1   13.20    1.33 
  -4   0  -1   13.12    0.95 
   4   0   1   13.93    1.03 
   4   0   1   13.23    0.81 
   4   0   1   13.45    1.02 
   4   0   1   13.46    1.29 
  -5   0  -1    3.29    0.53 
  -5   0  -1    2.58    0.69 
  -5   0  -1    3.03    0.72 
  -5   0  -1    1.92    0.52 
   5   0   1    2.71    0.47 
   5   0   1    2.10    0.57 
   5   0   1    1.51    0.60 
   5   0   1    2.75    0.60 
  -6   0  -1   80.57    3.99 
  -6   0  -1   76.29    3.75 
  -6   0  -1   75.00    3.50 
  -6   0  -1   77.64    3.21 
   6   0   1   81.71    3.70 
   6   0   1   79.97    3.18 
   6   0   1   82.51    3.95 
   6   0   1   74.26    3.56 
  -7   0  -1    2.88    0.78 
  -7   0  -1    2.36    0.77 
  -7   0  -1    1.24    0.73 
   7   0   1    2.11    0.53 
   7   0   1    1.58    0.64 
   7   0   1    2.43    0.77 
   7   0   1    2.21    0.68 
  -8   0  -1    3.14    0.92 
  -8   0  -1    2.25    0.75 
  -8   0  -1    2.94    1.02 
   8   0   1    2.04    0.82 
   8   0   1    3.54    0.92 
   8   0   1    3.37    0.93 
  -9   0  -1   17.61    2.04 
  -9   0  -1   14.23    2.19 
  -9   0  -1   22.50    2.42 
   9   0   1   16.78    1.98 
   9   0   1   19.18    2.51 
   9   0   1   14.98    2.00 
 -10   0  -1    1.14    0.83 
 -10   0  -1    0.03    0.62 
 -10   0  -1    2.27    1.13 
  10   0   1    0.70    0.73 
  10   0   1    1.73    0.93 
 -11   0  -1    5.06    1.57 
  11   0   1    2.21    1.07 
  11   0   1    4.96    1.59 
 -12   0  -1    1.15    1.20 
  12   0   1    2.66    1.28 
  12   0   1    4.33    1.72 
  12  -1  -1    0.62    1.03 
  12  -1  -1   -0.99    0.80 
 -12   1   1   -0.21    0.86 
  11  -1  -1    0.21    0.87 
  11  -1  -1    1.98    1.15 
 -11   1   1    1.47    1.10 
 -11   1   1    2.45    1.18 
  10  -1  -1    2.09    1.05 
  10  -1  -1    1.65    0.79 
 -10   1   1    2.35    1.19 
 -10   1   1    1.28    0.87 
   9  -1  -1   -0.89    0.46 
   9  -1  -1   -0.76    0.36 
   9  -1  -1    0.29    0.51 
  -9   1   1    0.53    0.67 
  -9   1   1   -0.21    0.64 
  -9   1   1    1.21    0.69 
   8  -1  -1   21.39    2.28 
   8  -1  -1   26.80    2.75 
   8  -1  -1   24.10    2.35 
  -8   1   1   19.28    2.45 
  -8   1   1   24.07    2.39 
  -8   1   1   23.52    2.30 
   7  -1  -1   24.90    1.95 
   7  -1  -1   31.95    1.61 
   7  -1  -1   33.45    2.24 
   7  -1  -1   23.97    2.45 
  -7   1   1   26.31    2.04 
  -7   1   1   27.95    1.96 
  -7   1   1   27.59    2.65 
   6  -1  -1    3.30    0.54 
   6  -1  -1    2.07    0.76 
   6  -1  -1    2.36    0.66 
   6  -1  -1    3.20    0.75 
  -6   1   1    2.50    0.78 
  -6   1   1    3.52    0.76 
  -6   1   1    2.42    0.70 
   5  -1  -1   66.12    2.63 
   5  -1  -1   64.73    3.24 
   5  -1  -1   64.46    3.09 
   5  -1  -1   64.16    3.11 
  -5   1   1   68.16    3.01 
  -5   1   1   67.01    3.35 
  -5   1   1   65.42    3.12 
   4  -1  -1   17.92    1.25 
   4  -1  -1   18.48    0.96 
   4  -1  -1   17.68    0.98 
   4  -1  -1   19.31    1.37 
   4  -1  -1   19.42    1.29 
  -4   1   1   17.78    1.27 
  -4   1   1   17.24    1.15 
  -4   1   1   18.25    1.04 
  -4   1   1   18.75    1.39 
   3  -1  -1  274.77    9.59 
   3  -1  -1  277.59    9.67 
   3  -1  -1  279.60    9.21 
   3  -1  -1  278.10    9.19 
   3  -1  -1  275.19    9.58 
  -3   1   1  276.26    9.60 
  -3   1   1  278.64    9.17 
  -3   1   1  280.45    9.39 
  -3   1   1  281.95    9.71 
   2  -1  -1    1.69    0.25 
   2  -1  -1    2.86    0.46 
   2  -1  -1    2.47    0.33 
   2  -1  -1    2.22    0.40 
   2  -1  -1    1.57    0.35 
  -2   1   1    1.86    0.29 
  -2   1   1    2.70    0.47 
  -2   1   1    1.56    0.38 
  -2   1   1    2.39    0.28 
   1  -1  -1    2.02    0.29 
   1  -1  -1    1.92    0.31 
   1  -1  -1    2.39    0.33 
   1  -1  -1    1.91    0.30 
   1  -1  -1    2.06    0.24 
   1  -1  -1    1.73    0.14 
  -1   1   1    2.50    0.31 
  -1   1   1    1.69    0.21 
  -1   1   1    1.62    0.32 
  -1   1   1    2.61    0.35 
  -1   1   1    1.90    0.30 
  -1   1   1    2.10    0.32 
  -1   1   1    1.85    0.14 
   0  -1  -1  178.03    5.63 
   0  -1  -1  167.84    5.72 
   0  -1  -1  169.04    5.73 
   0  -1  -1  168.98    5.70 
   0  -1  -1  170.42    5.69 
   0  -1  -1  169.52    5.63 
   0   1   1  176.74    5.71 
   0   1   1  173.86    5.62 
   0   1   1  175.59    5.63 
  -1  -1  -1   22.56    0.94 
  -1  -1  -1   22.73    1.02 
  -1  -1  -1   22.66    1.06 
  -1  -1  -1   22.82    1.02 
  -1  -1  -1   22.17    0.97 
  -1  -1  -1   23.85    1.01 
   1   1   1   21.85    0.99 
   1   1   1   21.49    0.97 
   1   1   1   22.02    1.01 
   1   1   1   21.49    1.01 
   1   1   1   21.67    1.01 
   1   1   1   24.15    0.96 
  -2  -1  -1   76.42    3.01 
  -2  -1  -1   76.25    2.95 
  -2  -1  -1   77.93    2.87 
  -2  -1  -1   75.93    2.70 
  -2  -1  -1   76.42    2.69 
  -2  -1  -1   78.43    2.80 
   2   1   1   75.32    2.95 
   2   1   1   77.86    2.69 
   2   1   1   78.80    2.88 
   2   1   1   74.05    2.79 
   2   1   1   72.74    2.87 
  -3  -1  -1   56.19    2.41 
  -3  -1  -1   60.33    2.65 
  -3  -1  -1   57.97    2.63 
  -3  -1  -1   59.68    2.34 
   3   1   1   59.71    2.41 
   3   1   1   59.23    2.62 
   3   1   1   66.31    2.60 
  -4  -1  -1    0.35    0.36 
  -4  -1  -1   -0.21    0.21 
  -4  -1  -1    0.62    0.30 
  -4  -1  -1    0.34    0.28 
   4   1   1   -0.04    0.30 
   4   1   1    1.10    0.46 
   4   1   1    0.08    0.22 
   4   1   1    0.33    0.27 
  -5  -1  -1    1.57    0.58 
  -5  -1  -1    1.02    0.51 
  -5  -1  -1    1.01    0.41 
  -5  -1  -1    0.55    0.31 
   5   1   1    0.72    0.43 
   5   1   1    0.55    0.35 
   5   1   1    0.87    0.44 
   5   1   1    0.48    0.30 
  -6  -1  -1    3.78    0.68 
  -6  -1  -1    2.61    0.64 
  -6  -1  -1    2.12    0.77 
  -6  -1  -1    3.66    0.84 
   6   1   1    2.39    0.62 
   6   1   1    3.41    0.79 
   6   1   1    4.01    0.68 
   6   1   1    4.16    0.87 
  -7  -1  -1   67.26    3.78 
  -7  -1  -1   77.21    3.56 
  -7  -1  -1   76.31    3.35 
  -7  -1  -1   70.11    3.98 
   7   1   1   76.91    3.81 
   7   1   1   74.63    3.94 
   7   1   1   75.14    3.28 
   7   1   1   73.16    3.53 
  -8  -1  -1   19.72    2.25 
  -8  -1  -1   18.47    2.33 
  -8  -1  -1   20.00    2.00 
   8   1   1   20.23    1.48 
   8   1   1   19.79    2.20 
   8   1   1   21.48    2.03 
   8   1   1   24.33    2.58 
  -9  -1  -1    0.66    0.78 
  -9  -1  -1   -0.04    0.49 
  -9  -1  -1   -0.10    0.60 
   9   1   1   -0.33    0.44 
   9   1   1    0.17    0.45 
   9   1   1   -0.19    0.56 
 -10  -1  -1   15.63    2.50 
 -10  -1  -1   13.27    2.11 
  10   1   1   10.28    1.98 
  10   1   1   14.58    2.12 
 -11  -1  -1    1.62    0.95 
 -11  -1  -1    1.51    1.10 
  11   1   1    3.89    1.43 
  11   1   1   -0.12    0.67 
 -12  -1  -1    0.38    1.14 
  12   1   1    0.32    0.87 
  12   1   1   -0.04    0.93 
  11  -2  -1   -0.16    0.57 
  11  -2  -1    0.14    0.73 
 -11   2   1    0.18    0.77 
 -11   2   1   -1.19    0.72 
  10  -2  -1    2.59    1.00 
  10  -2  -1    1.77    0.93 
  10  -2  -1    0.98    0.77 
 -10   2   1    0.23    0.58 
 -10   2   1    1.47    0.88 
   9  -2  -1   20.57    2.39 
   9  -2  -1   19.01    2.48 
   9  -2  -1   20.04    2.38 
  -9   2   1   16.27    2.35 
  -9   2   1   20.69    2.41 
   8  -2  -1    2.86    0.92 
   8  -2  -1    2.94    0.93 
   8  -2  -1    1.88    0.79 
  -8   2   1    3.94    1.07 
  -8   2   1    4.71    1.30 
  -8   2   1    1.97    0.77 
   7  -2  -1   27.96    2.67 
   7  -2  -1   26.77    2.05 
   7  -2  -1   26.25    2.07 
  -7   2   1   30.81    2.20 
  -7   2   1   24.61    2.55 
  -7   2   1   34.16    2.08 
   6  -2  -1   48.98    2.02 
   6  -2  -1   51.99    2.84 
   6  -2  -1   48.10    2.71 
   6  -2  -1   51.80    2.97 
  -6   2   1   45.07    2.82 
  -6   2   1   47.04    2.73 
  -6   2   1   51.55    2.58 
   5  -2  -1    8.37    1.15 
   5  -2  -1    9.30    0.63 
   5  -2  -1    7.00    1.02 
   5  -2  -1    7.95    0.58 
   5  -2  -1    8.58    1.23 
  -5   2   1    9.68    1.30 
  -5   2   1    9.47    1.23 
  -5   2   1    9.78    1.06 
   4  -2  -1   93.58    3.31 
   4  -2  -1   98.15    3.34 
   4  -2  -1   89.78    3.86 
   4  -2  -1   90.87    4.03 
   4  -2  -1   98.24    4.04 
  -4   2   1   93.45    4.05 
  -4   2   1   91.78    3.95 
  -4   2   1   97.09    3.30 
  -4   2   1   91.48    3.66 
   3  -2  -1    0.19    0.28 
   3  -2  -1    0.02    0.26 
   3  -2  -1    0.07    0.20 
   3  -2  -1    0.05    0.12 
   3  -2  -1   -0.16    0.16 
  -3   2   1    0.08    0.17 
  -3   2   1    0.08    0.29 
  -3   2   1   -0.15    0.09 
  -3   2   1   -0.18    0.24 
   2  -2  -1   61.80    2.19 
   2  -2  -1   57.97    2.51 
   2  -2  -1   60.55    2.53 
   2  -2  -1   58.55    2.11 
   2  -2  -1   56.03    2.41 
  -2   2   1   60.46    2.47 
  -2   2   1   62.08    2.20 
  -2   2   1   57.98    2.47 
  -2   2   1   59.50    2.10 
   1  -2  -1    6.70    0.68 
   1  -2  -1    6.70    0.43 
   1  -2  -1    6.95    0.63 
   1  -2  -1    7.20    0.66 
   1  -2  -1    6.96    0.37 
   1  -2  -1    6.34    0.64 
   1  -2  -1    5.70    0.62 
   1  -2  -1    6.92    0.50 
  -1   2   1    7.42    0.50 
  -1   2   1    6.61    0.37 
  -1   2   1    6.88    0.63 
  -1   2   1    6.21    0.49 
  -1   2   1    6.09    0.37 
  -1   2   1    6.17    0.41 
  -1   2   1    8.13    0.77 
   0  -2  -1    7.32    0.53 
   0  -2  -1    8.06    0.54 
   0  -2  -1    6.77    0.52 
   0  -2  -1    7.11    0.50 
   0  -2  -1    7.99    0.49 
   0  -2  -1    7.36    0.45 
   0  -2  -1    7.60    0.52 
   0  -2  -1    6.85    0.45 
   0  -2  -1    7.41    0.43 
   0   2   1    7.32    0.53 
   0   2   1    7.66    0.51 
   0   2   1    7.82    0.45 
   0   2   1    7.14    0.45 
   0   2   1    7.40    0.44 
   0   2   1    8.72    0.57 
   0   2   1    9.04    0.51 
   0   2   1    6.86    0.51 
   0   2   1    7.54    0.50 
  -1  -2  -1   96.33    3.44 
  -1  -2  -1   92.92    3.54 
  -1  -2  -1   91.96    3.52 
  -1  -2  -1  101.61    3.37 
  -1  -2  -1   97.80    3.49 
  -1  -2  -1   98.27    3.18 
  -1  -2  -1  101.55    3.59 
   1   2   1   88.16    3.52 
   1   2   1   99.71    3.36 
   1   2   1   97.92    3.44 
   1   2   1   97.76    3.57 
   1   2   1   95.66    3.18 
   1   2   1  102.01    3.53 
   1   2   1   95.57    3.47 
  -2  -2  -1   30.21    1.20 
  -2  -2  -1   30.40    1.51 
  -2  -2  -1   31.19    1.59 
  -2  -2  -1   32.33    1.55 
  -2  -2  -1   34.24    1.33 
   2   2   1   33.22    1.20 
   2   2   1   33.38    1.53 
   2   2   1   30.56    1.31 
   2   2   1   31.38    1.50 
  -3  -2  -1    1.71    0.46 
  -3  -2  -1    1.89    0.35 
  -3  -2  -1    1.30    0.46 
  -3  -2  -1    1.64    0.42 
  -3  -2  -1    1.96    0.33 
   3   2   1    1.94    0.48 
   3   2   1    2.13    0.37 
   3   2   1    2.73    0.56 
   3   2   1    1.56    0.30 
  -4  -2  -1    8.45    0.78 
  -4  -2  -1    8.36    1.09 
  -4  -2  -1    7.17    1.00 
  -4  -2  -1    7.21    0.90 
   4   2   1    7.77    0.98 
   4   2   1    9.63    0.96 
   4   2   1    7.95    1.01 
   4   2   1    7.49    0.77 
  -5  -2  -1   -0.02    0.39 
  -5  -2  -1    0.10    0.27 
  -5  -2  -1   -0.02    0.26 
  -5  -2  -1    1.03    0.54 
   5   2   1    0.45    0.27 
   5   2   1    0.04    0.32 
   5   2   1    0.16    0.35 
   5   2   1    0.13    0.25 
  -6  -2  -1   46.17    2.74 
  -6  -2  -1   43.06    2.70 
  -6  -2  -1   40.60    2.31 
  -6  -2  -1   43.09    2.27 
   6   2   1   48.28    2.67 
   6   2   1   49.98    2.36 
   6   2   1   46.57    2.33 
   6   2   1   44.43    2.66 
  -7  -2  -1    2.43    0.82 
  -7  -2  -1    2.47    0.81 
  -7  -2  -1    1.62    0.60 
  -7  -2  -1    3.28    0.74 
   7   2   1    2.62    0.82 
   7   2   1    2.98    0.68 
   7   2   1    4.80    1.10 
   7   2   1    2.67    0.67 
  -8  -2  -1   20.71    2.01 
  -8  -2  -1   25.82    2.62 
  -8  -2  -1   28.14    2.85 
   8   2   1   25.88    2.64 
   8   2   1   25.46    1.81 
   8   2   1   21.68    1.67 
   8   2   1   24.18    2.46 
  -9  -2  -1    7.86    1.35 
  -9  -2  -1    8.39    1.68 
  -9  -2  -1    7.92    1.70 
   9   2   1    7.97    1.52 
   9   2   1    4.73    1.30 
 -10  -2  -1    2.36    1.10 
 -10  -2  -1    1.15    0.85 
  10   2   1    1.45    0.87 
  10   2   1    1.37    0.85 
 -11  -2  -1    8.50    1.96 
 -11  -2  -1    5.56    1.65 
  11   2   1    7.69    1.79 
  11   2   1    5.66    1.46 
 -12  -2  -1   -0.01    0.73 
  12   2   1    0.80    0.91 
  12   2   1    0.42    0.98 
  11  -3  -1    1.30    1.13 
  11  -3  -1    1.31    0.82 
 -11   3   1    1.65    1.07 
 -11   3   1    2.43    1.11 
  10  -3  -1    3.44    1.06 
  10  -3  -1    3.42    1.27 
  10  -3  -1    3.65    1.21 
 -10   3   1    3.19    1.13 
 -10   3   1    0.92    0.80 
   9  -3  -1    0.22    0.69 
   9  -3  -1    0.51    0.67 
   9  -3  -1   -0.28    0.53 
  -9   3   1    0.55    0.71 
  -9   3   1    0.48    0.65 
   8  -3  -1   28.97    2.69 
   8  -3  -1   36.09    2.59 
   8  -3  -1   30.04    3.01 
  -8   3   1   27.53    2.89 
  -8   3   1   27.02    2.66 
  -8   3   1   28.70    2.06 
   7  -3  -1    5.04    1.05 
   7  -3  -1    3.47    0.95 
   7  -3  -1    3.95    1.03 
  -7   3   1    4.41    1.14 
  -7   3   1    3.56    0.82 
  -7   3   1    3.90    0.96 
   6  -3  -1   43.60    2.65 
   6  -3  -1   41.31    2.66 
   6  -3  -1   40.99    1.56 
   6  -3  -1   37.88    2.38 
  -6   3   1   43.70    2.61 
  -6   3   1   44.22    2.72 
  -6   3   1   43.79    2.29 
   5  -3  -1  200.57    6.39 
   5  -3  -1  187.95    7.32 
   5  -3  -1  198.11    6.39 
   5  -3  -1  188.37    7.54 
   5  -3  -1  180.37    7.53 
  -5   3   1  191.39    7.49 
  -5   3   1  194.44    7.59 
  -5   3   1  201.69    7.10 
   4  -3  -1   35.20    1.29 
   4  -3  -1   31.88    1.86 
   4  -3  -1   34.83    1.29 
   4  -3  -1   34.82    2.07 
   4  -3  -1   34.01    2.05 
  -4   3   1   35.51    1.27 
  -4   3   1   35.09    1.70 
  -4   3   1   31.81    1.96 
  -4   3   1   35.23    2.02 
   3  -3  -1   72.84    2.80 
   3  -3  -1   69.67    2.38 
   3  -3  -1   66.80    3.05 
   3  -3  -1   66.83    3.08 
   3  -3  -1   64.40    2.87 
  -3   3   1   66.52    2.63 
  -3   3   1   66.42    2.97 
  -3   3   1   61.43    2.93 
  -3   3   1   72.20    2.37 
   2  -3  -1    4.18    0.39 
   2  -3  -1    4.09    0.45 
   2  -3  -1    3.36    0.60 
   2  -3  -1    5.23    0.73 
   2  -3  -1    4.36    0.66 
   2  -3  -1    3.70    0.56 
  -2   3   1    4.36    0.60 
  -2   3   1    3.84    0.38 
  -2   3   1    4.53    0.45 
  -2   3   1    4.34    0.65 
   1  -3  -1  235.29    8.12 
   1  -3  -1  225.94    8.18 
   1  -3  -1  239.73    7.93 
   1  -3  -1  228.27    8.17 
   1  -3  -1  255.63    8.23 
   1  -3  -1  236.98    7.95 
   1  -3  -1  231.68    8.15 
  -1   3   1  244.15    8.05 
  -1   3   1  246.60    7.96 
  -1   3   1  245.93    7.93 
  -1   3   1  217.78    8.07 
  -1   3   1  240.44    7.90 
  -1   3   1  244.68    8.23 
   0  -3  -1    0.94    0.30 
   0  -3  -1    0.96    0.31 
   0  -3  -1    0.66    0.24 
   0  -3  -1    0.80    0.29 
   0  -3  -1    0.57    0.27 
   0  -3  -1    0.94    0.28 
   0  -3  -1    0.57    0.28 
   0   3   1    0.36    0.20 
   0   3   1    1.01    0.30 
   0   3   1    0.67    0.28 
   0   3   1    0.78    0.25 
   0   3   1    0.77    0.33 
   0   3   1    1.01    0.29 
   0   3   1    0.54    0.25 
  -1  -3  -1  198.28    7.01 
  -1  -3  -1  200.87    6.89 
  -1  -3  -1  204.69    6.65 
  -1  -3  -1  186.40    6.99 
  -1  -3  -1  203.24    7.05 
  -1  -3  -1  210.64    6.77 
   1   3   1  204.95    6.92 
   1   3   1  199.37    6.96 
   1   3   1  205.46    6.79 
   1   3   1  203.37    6.65 
   1   3   1  202.63    6.88 
   1   3   1  199.44    6.74 
  -2  -3  -1  166.86    5.84 
  -2  -3  -1  163.76    5.47 
  -2  -3  -1  158.79    5.89 
  -2  -3  -1  162.10    5.36 
  -2  -3  -1  160.15    5.96 
   2   3   1  166.19    5.36 
   2   3   1  159.00    5.81 
   2   3   1  161.86    5.47 
   2   3   1  156.75    5.76 
  -3  -3  -1  117.94    4.21 
  -3  -3  -1  120.98    4.68 
  -3  -3  -1  120.95    4.71 
  -3  -3  -1  119.56    4.17 
  -3  -3  -1  122.73    4.82 
   3   3   1  122.64    4.16 
   3   3   1  112.48    4.61 
   3   3   1  123.97    4.24 
   3   3   1  122.03    4.65 
  -4  -3  -1    0.28    0.25 
  -4  -3  -1    0.25    0.31 
  -4  -3  -1    0.12    0.36 
  -4  -3  -1    0.30    0.34 
   4   3   1   -0.10    0.16 
   4   3   1   -0.15    0.27 
   4   3   1   -0.25    0.27 
   4   3   1    0.31    0.34 
  -5  -3  -1   30.19    2.06 
  -5  -3  -1   33.57    1.67 
  -5  -3  -1   33.05    2.08 
  -5  -3  -1   31.67    1.92 
   5   3   1   31.87    2.03 
   5   3   1   35.32    1.67 
   5   3   1   30.65    1.83 
   5   3   1   31.71    1.99 
  -6  -3  -1    0.12    0.36 
  -6  -3  -1    0.00    0.31 
  -6  -3  -1    0.46    0.51 
  -6  -3  -1   -0.15    0.29 
   6   3   1    0.10    0.23 
   6   3   1   -0.21    0.37 
   6   3   1   -0.08    0.30 
   6   3   1   -0.71    0.24 
  -7  -3  -1    7.91    1.19 
  -7  -3  -1    6.55    1.27 
  -7  -3  -1    7.69    1.04 
  -7  -3  -1    7.96    1.43 
   7   3   1    5.43    1.14 
   7   3   1    7.07    1.09 
   7   3   1    4.67    1.08 
   7   3   1    7.82    1.03 
  -8  -3  -1    8.87    1.61 
  -8  -3  -1    6.92    1.16 
  -8  -3  -1    6.87    1.08 
  -8  -3  -1    4.90    1.23 
   8   3   1    6.11    1.01 
   8   3   1    6.24    1.35 
   8   3   1    7.24    1.44 
   8   3   1    5.57    1.05 
  -9  -3  -1    1.91    0.99 
  -9  -3  -1   -0.02    0.52 
   9   3   1    1.97    0.87 
   9   3   1    1.92    0.78 
 -10  -3  -1    3.15    1.32 
 -10  -3  -1    3.43    1.29 
  10   3   1    0.07    0.79 
  10   3   1    4.30    1.32 
 -11  -3  -1   -0.16    0.55 
 -11  -3  -1    0.19    0.78 
  11   3   1   -0.96    0.58 
  11   3   1    0.36    0.67 
 -12  -3  -1    5.06    1.64 
  12   3   1    6.98    1.88 
  12   3   1    7.87    1.93 
  11  -4  -1    2.34    1.21 
  11  -4  -1    0.96    0.94 
  11  -4  -1    3.35    1.43 
 -11   4   1    0.67    0.95 
 -11   4   1    1.83    1.19 
  10  -4  -1    3.56    1.31 
  10  -4  -1    2.56    1.12 
  10  -4  -1    1.41    0.91 
 -10   4   1    1.90    1.09 
 -10   4   1    4.65    1.35 
   9  -4  -1   18.30    2.49 
   9  -4  -1   12.57    1.87 
   9  -4  -1   16.46    2.26 
  -9   4   1   13.43    2.19 
  -9   4   1   12.69    2.04 
   8  -4  -1    6.22    1.34 
   8  -4  -1    3.79    0.97 
   8  -4  -1    4.63    1.29 
  -8   4   1    6.16    1.33 
  -8   4   1    3.46    1.06 
   7  -4  -1   23.73    2.24 
   7  -4  -1   23.63    2.50 
   7  -4  -1   24.58    2.49 
  -7   4   1   23.84    2.53 
  -7   4   1   25.95    1.78 
  -7   4   1   25.26    2.50 
   6  -4  -1   25.49    2.36 
   6  -4  -1   22.96    2.27 
   6  -4  -1   21.25    1.97 
  -6   4   1   22.24    1.53 
  -6   4   1   25.48    2.38 
  -6   4   1   23.44    2.25 
   5  -4  -1   11.39    1.48 
   5  -4  -1   16.91    1.81 
   5  -4  -1   15.77    1.53 
  -5   4   1   13.05    1.56 
  -5   4   1   13.68    1.06 
  -5   4   1   14.87    1.66 
   4  -4  -1   87.70    2.86 
   4  -4  -1   86.91    3.96 
   4  -4  -1   82.70    3.96 
   4  -4  -1   88.76    3.74 
  -4   4   1   88.74    3.45 
  -4   4   1   89.14    2.85 
  -4   4   1   82.84    3.83 
  -4   4   1   83.01    3.85 
   3  -4  -1   16.59    1.51 
   3  -4  -1   16.60    1.16 
   3  -4  -1   15.43    1.49 
   3  -4  -1   17.90    1.62 
   3  -4  -1   14.75    0.73 
  -3   4   1   15.70    0.73 
  -3   4   1   15.91    0.95 
  -3   4   1   16.22    1.23 
  -3   4   1   14.92    1.37 
   2  -4  -1   68.81    2.95 
   2  -4  -1   66.41    2.48 
   2  -4  -1   67.76    2.56 
   2  -4  -1   59.81    2.90 
   2  -4  -1   65.36    2.79 
   2  -4  -1   70.45    2.97 
  -2   4   1   65.75    2.79 
  -2   4   1   65.38    2.47 
  -2   4   1   65.85    2.54 
  -2   4   1   62.63    2.83 
  -2   4   1   66.43    2.58 
   1  -4  -1    7.33    0.84 
   1  -4  -1    8.34    0.75 
   1  -4  -1    7.22    0.78 
   1  -4  -1    8.31    0.81 
   1  -4  -1    7.07    0.69 
   1  -4  -1    6.14    0.76 
   1  -4  -1    5.96    0.77 
  -1   4   1    7.67    0.80 
  -1   4   1    8.08    0.59 
  -1   4   1    6.57    0.74 
  -1   4   1    6.97    0.72 
   0  -4  -1   13.49    0.90 
   0  -4  -1   12.51    0.84 
   0  -4  -1   11.88    0.88 
   0  -4  -1   14.65    0.95 
   0  -4  -1   14.10    0.86 
   0  -4  -1   11.31    0.86 
   0  -4  -1   12.02    0.87 
   0   4   1   14.07    0.87 
   0   4   1   13.16    0.87 
   0   4   1   12.88    0.80 
  -1  -4  -1  118.74    4.53 
  -1  -4  -1  117.47    4.37 
  -1  -4  -1  121.97    4.20 
  -1  -4  -1  117.83    4.51 
  -1  -4  -1  114.14    4.47 
  -1  -4  -1  118.18    4.14 
   1   4   1  120.94    4.25 
   1   4   1  113.43    4.33 
   1   4   1  120.40    4.20 
   1   4   1  118.29    4.42 
   1   4   1  118.69    4.14 
  -2  -4  -1   70.98    3.17 
  -2  -4  -1   74.82    2.67 
  -2  -4  -1   68.64    3.00 
  -2  -4  -1   66.95    3.09 
  -2  -4  -1   74.49    2.61 
   2   4   1   68.42    2.92 
   2   4   1   73.61    2.67 
   2   4   1   75.44    2.61 
   2   4   1   73.97    3.05 
  -3  -4  -1   46.99    2.43 
  -3  -4  -1   44.95    2.47 
  -3  -4  -1   48.76    1.90 
  -3  -4  -1   53.35    1.94 
  -3  -4  -1   49.98    2.44 
   3   4   1   47.53    1.90 
   3   4   1   47.91    2.32 
   3   4   1   52.20    1.91 
   3   4   1   47.07    2.36 
  -4  -4  -1   46.98    2.63 
  -4  -4  -1   51.26    2.10 
  -4  -4  -1   53.49    2.08 
  -4  -4  -1   49.81    2.74 
  -4  -4  -1   51.65    2.66 
   4   4   1   51.57    2.57 
   4   4   1   53.66    2.60 
   4   4   1   53.87    2.09 
   4   4   1   46.86    2.56 
  -5  -4  -1    0.38    0.29 
  -5  -4  -1    0.02    0.31 
  -5  -4  -1    0.06    0.33 
  -5  -4  -1   -0.04    0.38 
   5   4   1    0.00    0.20 
   5   4   1    0.73    0.42 
   5   4   1   -0.02    0.25 
   5   4   1    0.17    0.33 
  -6  -4  -1   28.29    1.61 
  -6  -4  -1   27.87    1.96 
  -6  -4  -1   26.62    2.51 
  -6  -4  -1   29.22    2.25 
   6   4   1   30.06    2.07 
   6   4   1   29.79    1.93 
   6   4   1   28.45    1.54 
   6   4   1   28.29    2.07 
  -7  -4  -1   10.27    1.64 
  -7  -4  -1   10.37    1.16 
  -7  -4  -1   10.34    1.44 
  -7  -4  -1    9.78    1.65 
   7   4   1    9.66    1.32 
   7   4   1   10.31    1.54 
   7   4   1    8.81    1.43 
   7   4   1   10.21    1.10 
  -8  -4  -1    0.13    0.51 
  -8  -4  -1   -0.27    0.44 
  -8  -4  -1    0.35    0.67 
  -8  -4  -1   -0.43    0.52 
   8   4   1    0.16    0.49 
   8   4   1   -0.63    0.40 
   8   4   1    0.21    0.53 
  -9  -4  -1    7.45    1.72 
  -9  -4  -1    8.76    1.79 
   9   4   1   10.37    1.52 
   9   4   1   11.30    1.91 
   9   4   1   10.59    1.82 
 -10  -4  -1   -0.06    0.64 
 -10  -4  -1    1.56    0.94 
  10   4   1    0.62    0.78 
  10   4   1    0.47    0.72 
 -11  -4  -1    2.91    1.33 
 -11  -4  -1    4.61    1.52 
  11   4   1    5.07    1.46 
  11   4   1    4.11    1.35 
  11  -5  -1    2.00    1.15 
  11  -5  -1    2.09    1.45 
 -11   5   1    3.78    1.37 
 -11   5   1    3.77    1.46 
  10  -5  -1   14.35    2.09 
  10  -5  -1   15.75    2.43 
  10  -5  -1   16.01    2.60 
 -10   5   1   12.05    2.33 
 -10   5   1   13.30    2.27 
   9  -5  -1    2.19    1.05 
   9  -5  -1    0.08    0.49 
   9  -5  -1    1.76    0.78 
  -9   5   1    1.99    0.98 
  -9   5   1    0.71    0.79 
   8  -5  -1    4.94    1.26 
   8  -5  -1    3.45    0.97 
   8  -5  -1    3.84    1.15 
  -8   5   1    0.46    0.69 
  -8   5   1    2.07    0.93 
   7  -5  -1   13.51    1.93 
   7  -5  -1   14.30    1.98 
   7  -5  -1   14.38    1.69 
  -7   5   1   11.03    1.70 
  -7   5   1   12.34    1.37 
  -7   5   1    8.32    1.55 
   6  -5  -1    9.61    1.51 
   6  -5  -1   10.05    1.37 
   6  -5  -1   11.25    1.65 
  -6   5   1   10.88    1.21 
  -6   5   1   12.42    1.70 
  -6   5   1   11.69    1.60 
   5  -5  -1   10.78    1.53 
   5  -5  -1    9.74    1.42 
   5  -5  -1   11.12    1.34 
  -5   5   1   10.10    1.40 
  -5   5   1   10.63    1.43 
  -5   5   1   12.08    1.18 
   4  -5  -1    3.47    0.25 
   4  -5  -1    3.25    0.80 
   4  -5  -1    3.58    0.81 
   4  -5  -1    2.58    0.66 
  -4   5   1    3.67    0.62 
  -4   5   1    2.71    0.71 
  -4   5   1    3.33    0.73 
  -4   5   1    3.29    0.25 
   3  -5  -1  134.23    5.43 
   3  -5  -1  132.81    4.65 
   3  -5  -1  134.72    5.46 
   3  -5  -1  136.92    5.23 
   3  -5  -1  132.11    5.50 
  -3   5   1  131.06    4.90 
  -3   5   1  131.93    5.35 
  -3   5   1  132.99    5.27 
  -3   5   1  139.91    4.67 
   2  -5  -1   46.91    2.21 
   2  -5  -1   45.41    2.36 
   2  -5  -1   44.19    2.31 
   2  -5  -1   42.94    2.29 
   2  -5  -1   46.05    1.92 
  -2   5   1   42.65    1.95 
  -2   5   1   46.71    2.20 
  -2   5   1   44.83    2.25 
   1  -5  -1   19.32    1.20 
   1  -5  -1   15.70    1.16 
   1  -5  -1   16.31    1.14 
   1  -5  -1   19.69    1.14 
   1  -5  -1   19.16    1.28 
   1  -5  -1   18.92    1.24 
   1  -5  -1   17.88    1.08 
  -1   5   1   18.81    1.14 
  -1   5   1   18.32    1.07 
  -1   5   1   17.22    1.14 
   0  -5  -1   94.76    3.71 
   0  -5  -1   89.69    3.74 
   0  -5  -1   93.63    3.76 
   0  -5  -1   91.98    3.66 
   0  -5  -1   88.65    3.70 
   0  -5  -1   96.74    3.77 
   0  -5  -1   94.80    3.62 
   0   5   1   99.81    3.66 
   0   5   1   91.78    3.67 
   0   5   1   94.28    3.57 
  -1  -5  -1    8.14    0.75 
  -1  -5  -1    6.83    0.86 
  -1  -5  -1    8.97    1.03 
  -1  -5  -1    8.68    1.00 
  -1  -5  -1    9.25    0.95 
  -1  -5  -1    8.74    1.00 
  -1  -5  -1    8.59    0.80 
   1   5   1    7.87    0.84 
   1   5   1    7.74    0.73 
   1   5   1    7.54    0.86 
  -2  -5  -1   28.72    1.25 
  -2  -5  -1   23.15    1.62 
  -2  -5  -1   25.72    1.20 
  -2  -5  -1   23.77    1.50 
  -2  -5  -1   25.22    1.60 
  -2  -5  -1   24.39    1.58 
   2   5   1   27.98    1.59 
   2   5   1   26.76    1.27 
   2   5   1   26.66    1.48 
   2   5   1   25.38    1.21 
   2   5   1   26.72    1.20 
  -3  -5  -1   83.56    2.95 
  -3  -5  -1   81.30    2.97 
  -3  -5  -1   78.48    3.53 
  -3  -5  -1   78.07    3.63 
  -3  -5  -1   80.53    3.72 
   3   5   1   75.42    3.37 
   3   5   1   82.07    2.96 
   3   5   1   77.06    3.52 
   3   5   1   81.02    2.94 
  -4  -5  -1    9.76    0.62 
  -4  -5  -1    8.16    1.19 
  -4  -5  -1    6.68    1.10 
  -4  -5  -1    8.21    1.17 
  -4  -5  -1    8.29    0.63 
   4   5   1    9.70    1.24 
   4   5   1    9.75    1.15 
   4   5   1    8.11    0.57 
   4   5   1    8.10    1.12 
  -5  -5  -1   44.65    1.97 
  -5  -5  -1   39.42    2.64 
  -5  -5  -1   48.52    2.74 
  -5  -5  -1   45.72    2.62 
   5   5   1   45.26    2.51 
   5   5   1   43.99    1.87 
   5   5   1   39.86    2.48 
   5   5   1   46.21    2.53 
  -6  -5  -1    0.99    0.60 
  -6  -5  -1    0.21    0.52 
  -6  -5  -1    1.01    0.39 
  -6  -5  -1    0.11    0.45 
   6   5   1    0.17    0.23 
   6   5   1    0.47    0.41 
   6   5   1    0.12    0.31 
   6   5   1    0.11    0.39 
  -7  -5  -1    4.53    0.75 
  -7  -5  -1    3.17    0.99 
  -7  -5  -1    4.40    1.03 
  -7  -5  -1    4.01    1.16 
   7   5   1    2.18    0.75 
   7   5   1    5.40    1.07 
   7   5   1    5.36    1.15 
  -8  -5  -1   19.42    2.43 
  -8  -5  -1   18.67    2.14 
  -8  -5  -1   16.68    2.28 
   8   5   1   12.82    1.93 
   8   5   1   19.18    2.29 
   8   5   1   19.47    2.08 
  -9  -5  -1    6.16    1.58 
  -9  -5  -1    5.91    1.53 
  -9  -5  -1    5.68    1.22 
   9   5   1    4.51    1.11 
   9   5   1    5.32    1.31 
   9   5   1    3.21    1.03 
 -10  -5  -1    1.17    1.11 
 -10  -5  -1    4.05    1.43 
  10   5   1    1.73    0.88 
  10   5   1    4.18    1.34 
 -11  -5  -1   -0.76    0.82 
 -11  -5  -1   -0.72    0.74 
  11   5   1   -0.01    0.55 
  11   5   1    0.27    0.57 
  11  -6  -1    6.23    1.76 
  11  -6  -1    9.15    2.08 
 -11   6   1    5.02    1.80 
 -11   6   1    4.38    1.50 
  10  -6  -1    1.31    0.84 
  10  -6  -1    1.79    1.09 
 -10   6   1    2.58    1.30 
 -10   6   1    2.70    1.11 
   9  -6  -1   36.86    3.67 
   9  -6  -1   43.14    4.16 
   9  -6  -1   34.17    2.64 
  -9   6   1   35.61    3.57 
  -9   6   1   32.04    3.32 
   8  -6  -1   29.84    2.75 
   8  -6  -1   25.80    2.92 
  -8   6   1   27.57    2.90 
  -8   6   1   28.79    3.05 
   7  -6  -1    2.20    0.95 
   7  -6  -1    5.22    1.34 
   7  -6  -1    1.38    0.67 
  -7   6   1    3.32    1.03 
  -7   6   1    2.60    0.97 
   6  -6  -1   36.84    2.70 
   6  -6  -1   38.67    2.44 
   6  -6  -1   39.36    2.72 
  -6   6   1   41.64    2.18 
  -6   6   1   38.13    2.63 
  -6   6   1   34.38    2.50 
   5  -6  -1    9.96    1.29 
   5  -6  -1    8.88    1.47 
   5  -6  -1   10.19    1.53 
  -5   6   1    6.48    1.16 
  -5   6   1    7.53    1.25 
  -5   6   1   11.34    1.18 
   4  -6  -1   56.61    2.07 
   4  -6  -1   47.10    2.90 
   4  -6  -1   52.56    3.00 
   4  -6  -1   53.63    3.10 
   4  -6  -1   53.56    2.77 
  -4   6   1   58.91    2.05 
  -4   6   1   54.57    2.90 
  -4   6   1   55.98    2.53 
  -4   6   1   48.34    2.84 
  -4   6   1   57.47    2.07 
   3  -6  -1    5.67    1.05 
   3  -6  -1    6.56    0.94 
   3  -6  -1    6.13    0.64 
   3  -6  -1    5.82    0.99 
   3  -6  -1    7.87    1.20 
  -3   6   1    6.27    1.00 
  -3   6   1    6.99    0.98 
  -3   6   1    6.94    0.81 
   2  -6  -1   16.40    1.57 
   2  -6  -1   18.47    1.71 
   2  -6  -1   20.60    1.35 
   2  -6  -1   18.98    1.12 
   2  -6  -1   17.77    1.69 
  -2   6   1   16.52    1.11 
  -2   6   1   17.91    1.28 
  -2   6   1   16.66    1.29 
   1  -6  -1   12.40    1.01 
   1  -6  -1   17.16    1.25 
   1  -6  -1   14.24    1.31 
   1  -6  -1   15.09    1.40 
   1  -6  -1   14.41    1.03 
   1  -6  -1   13.84    1.32 
   1  -6  -1   13.64    1.28 
  -1   6   1   13.21    1.24 
  -1   6   1   16.08    1.11 
  -1   6   1   14.50    1.01 
   0  -6  -1   26.56    1.62 
   0  -6  -1   27.40    1.62 
   0  -6  -1   26.91    1.57 
   0  -6  -1   29.29    1.56 
   0  -6  -1   27.47    1.64 
   0  -6  -1   27.06    1.60 
   0  -6  -1   27.99    1.59 
   0   6   1   25.25    1.48 
   0   6   1   27.78    1.57 
  -1  -6  -1   56.55    2.62 
  -1  -6  -1   52.90    2.67 
  -1  -6  -1   53.80    2.62 
  -1  -6  -1   59.77    2.50 
  -1  -6  -1   54.52    2.72 
  -1  -6  -1   55.56    2.39 
  -1  -6  -1   56.09    2.69 
   1   6   1   57.08    2.41 
   1   6   1   51.78    2.55 
   1   6   1   61.46    2.61 
  -2  -6  -1   17.70    1.32 
  -2  -6  -1   18.26    1.02 
  -2  -6  -1   19.52    1.77 
  -2  -6  -1   19.23    1.44 
  -2  -6  -1   18.88    1.38 
   2   6   1   17.67    1.28 
   2   6   1   16.36    0.98 
   2   6   1   18.32    1.22 
  -3  -6  -1    1.11    0.53 
  -3  -6  -1    1.02    0.30 
  -3  -6  -1    0.62    0.44 
  -3  -6  -1    1.06    0.46 
  -3  -6  -1    1.02    0.28 
   3   6   1    1.09    0.30 
   3   6   1    0.80    0.42 
   3   6   1    0.70    0.25 
   3   6   1    1.28    0.42 
  -4  -6  -1   71.86    2.74 
  -4  -6  -1   62.08    3.49 
  -4  -6  -1   74.28    2.60 
  -4  -6  -1   64.97    3.44 
  -4  -6  -1   69.90    3.45 
   4   6   1   69.43    3.40 
   4   6   1   69.96    2.61 
   4   6   1   68.52    2.58 
   4   6   1   66.91    3.22 
   4   6   1   63.80    3.32 
  -5  -6  -1    8.15    0.80 
  -5  -6  -1    7.49    0.55 
  -5  -6  -1    4.48    1.03 
  -5  -6  -1    8.35    1.31 
  -5  -6  -1    7.90    1.36 
   5   6   1    5.87    0.57 
   5   6   1    7.74    1.14 
   5   6   1    7.85    1.25 
   5   6   1    7.63    1.18 
  -6  -6  -1   53.63    3.06 
  -6  -6  -1   48.98    3.04 
  -6  -6  -1   45.66    2.15 
  -6  -6  -1   46.23    3.08 
   6   6   1   46.95    2.11 
   6   6   1   47.68    2.82 
   6   6   1   42.33    2.81 
   6   6   1   48.22    2.82 
  -7  -6  -1    1.68    0.82 
  -7  -6  -1    1.60    0.85 
  -7  -6  -1    0.38    0.67 
   7   6   1    0.51    0.52 
   7   6   1    0.45    0.51 
   7   6   1    1.89    0.80 
  -8  -6  -1    0.81    0.67 
  -8  -6  -1    0.62    0.63 
  -8  -6  -1    0.23    0.48 
   8   6   1    0.42    0.64 
   8   6   1    1.69    0.79 
   8   6   1    0.54    0.57 
  -9  -6  -1    8.44    1.55 
  -9  -6  -1    7.99    1.71 
  -9  -6  -1    6.76    1.63 
   9   6   1    8.88    1.56 
   9   6   1    5.19    1.36 
   9   6   1    6.23    1.45 
 -10  -6  -1   -0.60    0.68 
 -10  -6  -1    0.27    0.94 
  10   6   1   -0.33    0.43 
  10   6   1   -0.40    0.61 
 -11  -6  -1    8.69    2.10 
 -11  -6  -1    2.66    1.19 
  11   6   1    4.88    1.57 
  11   6   1    7.27    1.79 
  11  -7  -1    2.43    1.65 
  11  -7  -1    3.13    1.41 
 -11   7   1    3.98    1.43 
 -11   7   1    0.43    0.87 
  10  -7  -1   19.46    2.83 
  10  -7  -1   24.23    3.28 
 -10   7   1   21.11    2.87 
 -10   7   1   20.74    2.90 
   9  -7  -1    4.33    1.31 
   9  -7  -1    2.03    1.18 
   9  -7  -1    1.16    1.01 
  -9   7   1    2.94    1.27 
  -9   7   1    2.99    1.22 
   8  -7  -1   19.62    2.20 
   8  -7  -1   18.88    2.55 
   8  -7  -1   17.00    2.48 
  -8   7   1   13.79    2.18 
  -8   7   1   16.20    2.30 
   7  -7  -1   16.21    2.34 
   7  -7  -1   24.57    2.39 
   7  -7  -1   25.31    2.80 
  -7   7   1   22.51    2.54 
  -7   7   1   19.31    2.37 
   6  -7  -1   13.23    1.93 
   6  -7  -1   10.41    1.74 
   6  -7  -1   15.19    1.78 
  -6   7   1   12.58    1.78 
  -6   7   1   12.50    1.36 
  -6   7   1   16.24    1.98 
   5  -7  -1    4.16    0.90 
   5  -7  -1    5.32    1.13 
   5  -7  -1    3.15    0.98 
  -5   7   1    4.58    1.02 
  -5   7   1    3.93    0.75 
  -5   7   1    3.59    0.93 
   4  -7  -1    2.27    0.74 
   4  -7  -1    5.21    0.54 
   4  -7  -1    4.79    0.93 
   4  -7  -1    5.17    1.10 
   4  -7  -1    4.03    0.97 
  -4   7   1    5.49    0.62 
  -4   7   1    3.27    0.85 
  -4   7   1    5.13    0.80 
  -4   7   1    4.80    0.50 
  -4   7   1    4.49    0.92 
   3  -7  -1   55.69    3.01 
   3  -7  -1   51.66    2.95 
   3  -7  -1   58.23    2.40 
   3  -7  -1   51.73    3.01 
   3  -7  -1   55.16    2.79 
  -3   7   1   56.16    2.87 
  -3   7   1   55.50    2.93 
  -3   7   1   55.08    2.54 
   2  -7  -1    6.69    1.06 
   2  -7  -1    8.63    1.20 
   2  -7  -1    7.95    0.91 
   2  -7  -1    8.42    1.08 
   2  -7  -1    8.77    1.04 
   2  -7  -1    8.52    1.20 
  -2   7   1    8.83    1.13 
  -2   7   1    8.23    0.98 
  -2   7   1    7.39    1.03 
   1  -7  -1   34.81    1.99 
   1  -7  -1   39.76    2.05 
   1  -7  -1   34.33    2.04 
   1  -7  -1   34.32    1.94 
   1  -7  -1   30.50    1.94 
   1  -7  -1   34.80    2.02 
   1  -7  -1   33.68    1.87 
  -1   7   1   36.83    1.97 
  -1   7   1   34.55    1.92 
  -1   7   1   35.77    1.90 
   0  -7  -1    3.49    0.70 
   0  -7  -1    4.61    0.80 
   0  -7  -1    5.23    0.80 
   0  -7  -1    4.88    0.77 
   0  -7  -1    3.83    0.77 
   0  -7  -1    3.54    0.74 
   0  -7  -1    4.75    0.82 
   0   7   1    4.52    0.76 
   0   7   1    3.92    0.69 
   0   7   1    4.15    0.68 
  -1  -7  -1   29.94    1.87 
  -1  -7  -1   26.78    1.81 
  -1  -7  -1   28.76    1.78 
  -1  -7  -1   28.89    1.62 
  -1  -7  -1   30.59    1.80 
  -1  -7  -1   28.50    1.79 
  -1  -7  -1   26.50    1.52 
   1   7   1   25.96    1.63 
   1   7   1   27.99    1.70 
   1   7   1   30.08    1.58 
  -2  -7  -1    0.36    0.34 
  -2  -7  -1    0.06    0.31 
  -2  -7  -1    0.12    0.24 
  -2  -7  -1    0.23    0.41 
  -2  -7  -1    0.00    0.28 
   2   7   1    0.28    0.23 
   2   7   1   -0.11    0.28 
   2   7   1    0.46    0.33 
  -3  -7  -1   11.33    1.49 
  -3  -7  -1   11.44    1.40 
  -3  -7  -1   13.46    1.62 
  -3  -7  -1   11.74    0.84 
   3   7   1   13.88    0.84 
   3   7   1   10.24    1.34 
   3   7   1   12.07    1.38 
   3   7   1   12.66    1.33 
  -4  -7  -1    1.83    0.71 
  -4  -7  -1    2.11    0.41 
  -4  -7  -1    3.16    0.92 
  -4  -7  -1    1.33    0.64 
   4   7   1    3.42    0.81 
   4   7   1    2.79    0.79 
   4   7   1    3.69    0.45 
   4   7   1    2.73    0.39 
   4   7   1    3.37    0.74 
  -5  -7  -1   31.46    2.32 
  -5  -7  -1   30.34    1.47 
  -5  -7  -1   26.83    2.50 
  -5  -7  -1   21.26    2.26 
   5   7   1   26.09    1.17 
   5   7   1   26.19    1.89 
   5   7   1   25.21    1.96 
   5   7   1   25.32    1.97 
  -6  -7  -1    1.46    0.71 
  -6  -7  -1    1.24    0.71 
  -6  -7  -1    0.46    0.59 
   6   7   1    2.25    0.77 
   6   7   1    2.58    0.85 
   6   7   1    1.00    0.60 
  -7  -7  -1   49.92    3.21 
  -7  -7  -1   52.46    3.56 
  -7  -7  -1   46.00    3.26 
   7   7   1   45.13    2.98 
   7   7   1   49.13    3.25 
   7   7   1   59.88    3.35 
  -8  -7  -1   20.12    2.46 
  -8  -7  -1   19.19    2.56 
  -8  -7  -1   18.45    2.55 
   8   7   1   18.81    2.32 
   8   7   1   14.97    2.02 
   8   7   1   20.27    2.47 
  -9  -7  -1    0.65    0.67 
  -9  -7  -1    2.97    1.06 
  -9  -7  -1    1.75    0.97 
   9   7   1    0.67    0.67 
   9   7   1    0.78    0.80 
   9   7   1   -0.17    0.65 
 -10  -7  -1    0.04    0.58 
 -10  -7  -1    0.86    0.77 
  10   7   1    0.77    0.75 
  10   7   1    0.54    0.77 
  10   7   1    0.85    0.66 
 -11  -7  -1    3.75    1.60 
 -11  -7  -1    2.24    1.26 
  11   7   1    0.15    0.79 
  11   7   1    1.61    0.97 
  10  -8  -1    0.36    1.15 
  10  -8  -1   -0.94    0.70 
 -10   8   1    0.87    0.99 
 -10   8   1    1.21    1.00 
   9  -8  -1   36.51    3.85 
   9  -8  -1   31.63    3.64 
  -9   8   1   30.76    3.43 
  -9   8   1   28.41    3.30 
   8  -8  -1   17.45    2.56 
   8  -8  -1   15.81    2.01 
   8  -8  -1    8.14    1.80 
  -8   8   1   16.29    2.39 
  -8   8   1   14.92    2.28 
   7  -8  -1    1.14    0.82 
   7  -8  -1    0.21    0.55 
   7  -8  -1   -0.50    0.59 
  -7   8   1    0.12    0.54 
  -7   8   1   -0.02    0.63 
   6  -8  -1    2.34    1.01 
   6  -8  -1    3.07    1.12 
   6  -8  -1    1.94    0.80 
  -6   8   1    2.34    0.77 
  -6   8   1    1.22    0.80 
  -6   8   1    0.76    0.73 
   5  -8  -1    0.00    0.39 
   5  -8  -1   -0.36    0.33 
   5  -8  -1   -0.29    0.42 
  -5   8   1   -0.45    0.29 
  -5   8   1   -0.09    0.28 
  -5   8   1   -0.12    0.43 
   4  -8  -1   39.24    1.80 
   4  -8  -1   36.41    2.58 
   4  -8  -1   39.27    2.61 
   4  -8  -1   34.56    2.61 
   4  -8  -1   41.82    2.42 
  -4   8   1   42.21    1.79 
  -4   8   1   40.17    2.50 
  -4   8   1   36.66    2.10 
  -4   8   1   38.94    2.54 
   3  -8  -1    4.70    0.69 
   3  -8  -1    3.29    0.89 
   3  -8  -1    2.99    0.85 
   3  -8  -1    3.28    0.89 
   3  -8  -1    2.91    0.73 
  -3   8   1    3.92    0.82 
  -3   8   1    3.98    0.92 
  -3   8   1    4.81    0.66 
  -3   8   1    3.43    0.69 
   2  -8  -1   14.93    1.36 
   2  -8  -1   11.92    1.33 
   2  -8  -1   15.49    1.64 
   2  -8  -1   16.62    1.77 
   2  -8  -1   16.55    1.80 
   2  -8  -1   13.58    1.59 
   2  -8  -1   12.03    1.38 
  -2   8   1   14.05    1.37 
  -2   8   1   14.85    1.56 
  -2   8   1   17.02    1.64 
   1  -8  -1  146.76    5.66 
   1  -8  -1  137.58    5.60 
   1  -8  -1  142.98    5.68 
   1  -8  -1  142.74    5.55 
   1  -8  -1  141.04    5.69 
   1  -8  -1  136.05    5.70 
   1  -8  -1  136.86    5.72 
  -1   8   1  148.29    5.61 
  -1   8   1  134.68    5.46 
  -1   8   1  132.57    5.50 
   0  -8  -1   20.81    1.58 
   0  -8  -1   19.10    1.75 
   0  -8  -1   23.07    1.63 
   0  -8  -1   20.40    1.58 
   0  -8  -1   20.02    1.45 
   0  -8  -1   23.26    1.60 
   0  -8  -1   22.19    1.58 
   0   8   1   22.39    1.50 
   0   8   1   21.75    1.47 
   0   8   1   20.63    1.47 
   0   8   1   20.62    1.40 
  -1  -8  -1   21.80    1.40 
  -1  -8  -1   21.61    1.60 
  -1  -8  -1   23.16    1.65 
  -1  -8  -1   22.07    1.48 
  -1  -8  -1   21.01    1.58 
  -1  -8  -1   19.22    1.89 
  -1  -8  -1   21.99    1.71 
   1   8   1   20.01    1.47 
   1   8   1   24.46    1.46 
   1   8   1   18.89    1.46 
  -2  -8  -1   39.87    2.42 
  -2  -8  -1   42.56    2.52 
  -2  -8  -1   39.64    1.98 
  -2  -8  -1   37.92    2.47 
  -2  -8  -1   37.19    2.28 
   2   8   1   38.32    2.16 
   2   8   1   43.93    1.99 
   2   8   1   36.99    2.25 
   2   8   1   41.24    2.39 
  -3  -8  -1    3.07    0.85 
  -3  -8  -1    5.33    0.70 
  -3  -8  -1    5.14    0.99 
  -3  -8  -1    3.82    0.90 
   3   8   1    4.39    0.90 
   3   8   1    3.50    0.83 
   3   8   1    3.50    0.74 
   3   8   1    4.22    0.59 
  -4  -8  -1   15.18    0.99 
  -4  -8  -1   14.85    1.89 
  -4  -8  -1   12.06    1.63 
  -4  -8  -1   14.94    1.77 
   4   8   1   13.08    1.62 
   4   8   1   11.56    1.55 
   4   8   1   14.46    0.84 
   4   8   1   13.42    1.48 
  -5  -8  -1    0.16    0.43 
  -5  -8  -1    0.00    0.38 
  -5  -8  -1    0.52    0.29 
  -5  -8  -1    0.31    0.52 
   5   8   1   -0.43    0.15 
   5   8   1   -0.24    0.31 
   5   8   1   -0.13    0.40 
  -6  -8  -1   21.56    2.56 
  -6  -8  -1   19.29    2.28 
  -6  -8  -1   18.07    2.24 
   6   8   1   22.25    2.33 
   6   8   1   24.07    2.46 
   6   8   1   21.96    2.23 
  -7  -8  -1    3.39    1.12 
  -7  -8  -1    1.74    0.98 
  -7  -8  -1    1.62    0.88 
   7   8   1    1.79    0.78 
   7   8   1    2.50    0.82 
   7   8   1    2.91    0.97 
  -8  -8  -1    0.10    0.65 
  -8  -8  -1    0.55    0.65 
  -8  -8  -1    0.74    0.79 
   8   8   1    0.89    0.79 
   8   8   1   -0.27    0.43 
   8   8   1    0.06    0.57 
  -9  -8  -1   26.46    3.32 
  -9  -8  -1   27.56    3.06 
  -9  -8  -1   20.12    2.79 
   9   8   1   23.85    2.79 
   9   8   1   23.09    2.89 
   9   8   1   24.00    2.74 
 -10  -8  -1    5.65    1.73 
 -10  -8  -1    5.45    1.59 
  10   8   1    5.95    1.56 
  10   8   1    7.10    1.65 
  10   8   1    6.50    1.54 
 -11  -8  -1   -0.81    0.82 
 -11  -8  -1    1.12    1.22 
  11   8   1    0.94    1.08 
  11   8   1    2.14    1.17 
  10  -9  -1    3.05    1.25 
  10  -9  -1    2.45    1.37 
 -10   9   1    1.75    1.22 
 -10   9   1    3.61    1.48 
   9  -9  -1    1.56    1.06 
   9  -9  -1    1.08    0.97 
  -9   9   1    0.64    0.90 
  -9   9   1   -0.03    0.69 
   8  -9  -1   11.89    2.12 
   8  -9  -1    8.91    1.92 
  -8   9   1    7.98    1.68 
  -8   9   1   12.87    2.13 
   7  -9  -1   22.65    2.82 
   7  -9  -1   17.12    2.52 
   7  -9  -1   22.47    2.44 
  -7   9   1   20.08    2.51 
  -7   9   1   20.00    2.59 
   6  -9  -1    1.88    0.78 
   6  -9  -1    0.75    0.66 
   6  -9  -1    2.19    0.95 
  -6   9   1    1.15    0.83 
  -6   9   1   -0.10    0.59 
   5  -9  -1    7.65    1.49 
   5  -9  -1    6.38    1.47 
   5  -9  -1    8.73    1.55 
   5  -9  -1    6.23    1.19 
  -5   9   1    6.75    1.29 
  -5   9   1    7.93    1.13 
  -5   9   1    6.69    1.31 
   4  -9  -1   -0.30    0.31 
   4  -9  -1    0.26    0.42 
   4  -9  -1    0.58    0.35 
   4  -9  -1    0.40    0.57 
   4  -9  -1   -0.10    0.41 
  -4   9   1    0.75    0.44 
  -4   9   1    0.57    0.30 
  -4   9   1    0.33    0.47 
  -4   9   1    0.22    0.37 
   3  -9  -1   16.50    1.98 
   3  -9  -1   15.17    1.85 
   3  -9  -1   18.08    1.26 
   3  -9  -1   19.02    1.84 
   3  -9  -1   15.18    1.90 
  -3   9   1   15.27    1.80 
  -3   9   1   16.32    1.16 
  -3   9   1   18.37    1.92 
  -3   9   1   15.12    1.53 
   2  -9  -1   20.95    1.56 
   2  -9  -1   16.51    1.54 
   2  -9  -1   17.77    1.91 
   2  -9  -1   16.49    1.83 
   2  -9  -1   15.71    1.63 
   2  -9  -1   20.70    2.09 
   2  -9  -1   15.10    1.78 
  -2   9   1   18.19    1.42 
  -2   9   1   20.37    1.92 
  -2   9   1   15.55    1.23 
  -2   9   1   18.05    1.81 
   1  -9  -1    2.81    0.71 
   1  -9  -1    3.42    0.84 
   1  -9  -1    2.54    0.78 
   1  -9  -1    2.70    0.77 
   1  -9  -1    1.83    0.65 
   1  -9  -1    2.88    0.73 
   1  -9  -1    1.51    0.64 
  -1   9   1    1.96    0.59 
  -1   9   1    4.09    0.81 
  -1   9   1    2.46    0.68 
  -1   9   1    2.66    0.66 
  -1   9   1    2.51    0.68 
   0  -9  -1   89.81    4.24 
   0  -9  -1   95.68    4.33 
   0  -9  -1   99.21    4.28 
   0  -9  -1   97.57    4.42 
   0  -9  -1   91.70    4.26 
   0  -9  -1   94.67    4.16 
   0  -9  -1   89.51    4.28 
   0   9   1   95.61    4.17 
   0   9   1   98.38    4.09 
   0   9   1  100.28    4.26 
   0   9   1   95.62    4.13 
   0   9   1   93.92    4.17 
  -1  -9  -1   17.54    1.81 
  -1  -9  -1   17.68    1.78 
  -1  -9  -1   17.33    1.56 
  -1  -9  -1   14.72    1.71 
  -1  -9  -1   15.89    1.68 
  -1  -9  -1   15.81    1.84 
  -1  -9  -1   12.45    1.38 
   1   9   1   16.37    1.62 
   1   9   1   14.98    1.61 
   1   9   1   13.54    1.52 
   1   9   1   15.73    1.43 
  -2  -9  -1    3.56    0.89 
  -2  -9  -1    2.66    0.80 
  -2  -9  -1    2.47    0.71 
  -2  -9  -1    3.57    0.67 
  -2  -9  -1    2.60    0.78 
   2   9   1    2.78    0.68 
   2   9   1    3.56    0.64 
   2   9   1    3.19    0.78 
   2   9   1    3.79    0.82 
  -3  -9  -1   30.33    2.32 
  -3  -9  -1   29.06    2.11 
  -3  -9  -1   30.10    2.26 
  -3  -9  -1   27.53    1.60 
   3   9   1   28.59    1.88 
   3   9   1   29.34    1.55 
   3   9   1   28.66    2.04 
   3   9   1   28.41    2.10 
  -4  -9  -1    4.40    1.07 
  -4  -9  -1    5.51    1.13 
  -4  -9  -1    5.81    1.23 
  -4  -9  -1    4.37    0.67 
   4   9   1    3.87    0.53 
   4   9   1    4.76    1.07 
   4   9   1    5.75    1.13 
   4   9   1    5.43    0.97 
  -5  -9  -1    5.83    1.29 
  -5  -9  -1    9.14    1.61 
  -5  -9  -1    9.38    1.63 
   5   9   1   10.70    1.61 
   5   9   1   11.53    1.63 
   5   9   1    9.35    1.37 
  -6  -9  -1    3.46    1.06 
  -6  -9  -1    1.57    0.84 
  -6  -9  -1    1.55    0.83 
   6   9   1    2.27    0.86 
   6   9   1    2.17    0.76 
   6   9   1    2.31    0.86 
  -7  -9  -1    9.50    1.74 
  -7  -9  -1    9.35    1.75 
  -7  -9  -1   10.13    1.94 
   7   9   1    7.75    1.40 
   7   9   1   11.55    1.79 
   7   9   1   13.40    2.02 
  -8  -9  -1   16.34    2.44 
  -8  -9  -1   18.32    2.54 
  -8  -9  -1   16.19    2.59 
   8   9   1   13.41    2.00 
   8   9   1   17.79    2.24 
   8   9   1   12.70    2.13 
  -9  -9  -1   -0.04    0.77 
  -9  -9  -1    0.14    0.62 
  -9  -9  -1    1.07    0.88 
   9   9   1    0.51    0.73 
   9   9   1    0.20    0.77 
   9   9   1    0.56    0.77 
 -10  -9  -1    4.30    1.53 
 -10  -9  -1    4.78    1.70 
  10   9   1    7.51    1.78 
  10   9   1    3.74    1.31 
  10   9   1    2.10    1.14 
  10 -10  -1   -0.33    0.64 
  10 -10  -1   -1.28    0.88 
 -10  10   1    0.02    0.66 
 -10  10   1    0.29    0.69 
 -10  10   1    0.02    0.93 
   9 -10  -1    8.64    2.08 
   9 -10  -1    5.96    1.81 
  -9  10   1    7.94    1.91 
  -9  10   1    7.68    1.76 
   8 -10  -1    6.49    1.66 
   8 -10  -1    9.51    2.08 
  -8  10   1    9.40    1.93 
  -8  10   1    7.70    1.75 
   7 -10  -1    0.82    0.94 
   7 -10  -1    5.27    1.45 
  -7  10   1    5.38    1.35 
  -7  10   1    3.18    1.19 
   6 -10  -1   27.52    3.11 
   6 -10  -1   32.10    2.37 
   6 -10  -1   31.67    3.34 
  -6  10   1   25.64    2.79 
  -6  10   1   24.40    2.85 
   5 -10  -1    4.28    1.29 
   5 -10  -1    5.15    1.34 
   5 -10  -1    5.30    1.20 
   5 -10  -1    3.36    1.16 
  -5  10   1    3.68    1.07 
  -5  10   1    4.06    0.90 
  -5  10   1    6.13    1.36 
   4 -10  -1   18.57    2.36 
   4 -10  -1   17.36    2.17 
   4 -10  -1   15.46    1.81 
   4 -10  -1   16.96    2.16 
  -4  10   1   17.17    2.09 
  -4  10   1   15.26    1.94 
  -4  10   1   18.80    1.79 
   3 -10  -1   31.57    2.46 
   3 -10  -1   32.59    2.44 
   3 -10  -1   35.82    2.52 
   3 -10  -1   38.65    2.10 
   3 -10  -1   41.47    2.44 
  -3  10   1   30.65    2.29 
  -3  10   1   38.15    2.00 
  -3  10   1   30.32    2.07 
  -3  10   1   36.31    2.38 
   2 -10  -1    0.45    0.39 
   2 -10  -1    0.61    0.45 
   2 -10  -1   -0.12    0.37 
   2 -10  -1    0.80    0.49 
   2 -10  -1    1.12    0.58 
   2 -10  -1    0.79    0.56 
   2 -10  -1    1.15    0.60 
  -2  10   1    0.24    0.32 
  -2  10   1    0.20    0.42 
  -2  10   1   -0.12    0.38 
  -2  10   1    0.61    0.45 
   1 -10  -1    1.41    0.61 
   1 -10  -1    1.06    0.58 
   1 -10  -1    0.70    0.47 
   1 -10  -1    3.00    0.75 
   1 -10  -1    0.67    0.51 
   1 -10  -1    0.58    0.50 
   1 -10  -1    2.40    0.75 
  -1  10   1    1.44    0.61 
  -1  10   1    0.98    0.53 
  -1  10   1    0.31    0.43 
  -1  10   1    2.65    0.72 
  -1  10   1    0.85    0.47 
   0 -10  -1    0.79    0.47 
   0 -10  -1    0.45    0.47 
   0 -10  -1    0.50    0.46 
   0 -10  -1    0.98    0.51 
   0 -10  -1    1.31    0.61 
   0 -10  -1    1.48    0.58 
   0 -10  -1    0.58    0.47 
   0  10   1    0.75    0.46 
   0  10   1    0.61    0.41 
   0  10   1    0.75    0.48 
   0  10   1    1.00    0.48 
   0  10   1    0.82    0.47 
  -1 -10  -1   19.51    1.94 
  -1 -10  -1   20.61    2.18 
  -1 -10  -1   23.54    2.19 
  -1 -10  -1   15.46    1.82 
  -1 -10  -1   19.03    1.46 
  -1 -10  -1   19.18    1.80 
  -1 -10  -1   17.31    1.95 
   1  10   1   18.73    1.86 
   1  10   1   19.87    1.96 
   1  10   1   21.14    1.51 
   1  10   1   19.93    1.86 
  -2 -10  -1   32.01    1.81 
  -2 -10  -1   26.67    2.64 
  -2 -10  -1   25.15    2.43 
  -2 -10  -1   30.32    2.22 
  -2 -10  -1   28.13    2.09 
   2  10   1   24.80    1.95 
   2  10   1   26.37    1.97 
   2  10   1   26.14    1.85 
   2  10   1   28.27    1.69 
  -3 -10  -1    1.58    0.79 
  -3 -10  -1    1.16    0.69 
  -3 -10  -1    1.82    0.54 
  -3 -10  -1    2.38    0.81 
   3  10   1    2.39    0.80 
   3  10   1    3.18    0.78 
   3  10   1    2.30    0.72 
   3  10   1    1.99    0.53 
  -4 -10  -1   30.39    1.71 
  -4 -10  -1   32.97    2.45 
  -4 -10  -1   26.87    2.75 
  -4 -10  -1   29.51    3.00 
   4  10   1   29.48    2.30 
   4  10   1   32.65    2.16 
   4  10   1   30.43    2.28 
  -5 -10  -1   10.64    1.75 
  -5 -10  -1    8.45    1.59 
  -5 -10  -1   12.21    1.95 
   5  10   1   12.98    1.68 
   5  10   1   14.39    1.93 
   5  10   1   12.59    1.82 
  -6 -10  -1    2.97    1.18 
  -6 -10  -1    3.45    1.15 
  -6 -10  -1    5.60    1.39 
   6  10   1    3.83    1.15 
   6  10   1    3.54    1.00 
   6  10   1    3.27    1.00 
  -7 -10  -1    4.21    1.35 
  -7 -10  -1    5.43    1.45 
  -7 -10  -1    5.53    1.45 
   7  10   1    4.92    1.19 
   7  10   1    6.11    1.42 
   7  10   1    6.84    1.50 
  -8 -10  -1    0.63    0.99 
  -8 -10  -1    3.54    1.26 
  -8 -10  -1    2.13    1.13 
   8  10   1    2.81    1.14 
   8  10   1    2.67    1.10 
   8  10   1    1.82    0.87 
  -9 -10  -1    8.11    1.88 
  -9 -10  -1   17.43    2.53 
  -9 -10  -1    7.64    1.99 
   9  10   1   10.32    1.95 
   9  10   1   12.74    2.28 
   9  10   1   13.97    2.14 
 -10 -10  -1   -0.10    0.65 
 -10 -10  -1    2.63    1.25 
  10  10   1    3.21    1.26 
  10  10   1    2.75    1.36 
  10  10   1    5.71    1.59 
   9 -11  -1    0.89    1.03 
   9 -11  -1    0.90    1.04 
  -9  11   1   -0.17    0.62 
  -9  11   1    1.18    1.10 
   8 -11  -1    3.22    1.45 
   8 -11  -1    1.31    0.99 
  -8  11   1    0.07    0.64 
  -8  11   1    0.74    0.88 
   7 -11  -1    6.45    1.71 
   7 -11  -1    7.03    1.78 
  -7  11   1    6.25    1.55 
  -7  11   1    4.16    1.34 
   6 -11  -1    6.07    1.58 
   6 -11  -1    5.00    1.37 
   6 -11  -1    3.99    1.24 
  -6  11   1    3.82    1.25 
  -6  11   1    3.87    1.20 
   5 -11  -1   27.16    3.09 
   5 -11  -1   22.82    2.82 
   5 -11  -1   27.41    3.00 
   5 -11  -1   29.08    2.66 
  -5  11   1   25.99    2.69 
  -5  11   1   30.33    3.03 
   4 -11  -1   10.18    1.58 
   4 -11  -1   19.26    2.31 
   4 -11  -1   16.16    2.23 
   4 -11  -1   17.34    2.26 
  -4  11   1   14.49    1.91 
  -4  11   1   21.86    2.40 
  -4  11   1   12.36    1.52 
   3 -11  -1    4.23    1.18 
   3 -11  -1    2.40    0.97 
   3 -11  -1    2.39    0.97 
   3 -11  -1    2.76    0.86 
  -3  11   1    1.84    0.81 
  -3  11   1    2.57    0.67 
  -3  11   1    2.12    0.79 
  -3  11   1    2.68    0.77 
   2 -11  -1   30.73    2.19 
   2 -11  -1   28.91    2.73 
   2 -11  -1   30.21    2.28 
   2 -11  -1   31.63    2.90 
   2 -11  -1   27.03    2.07 
   2 -11  -1   34.56    2.44 
   2 -11  -1   30.16    2.06 
  -2  11   1   29.76    2.26 
  -2  11   1   32.75    2.01 
  -2  11   1   27.00    2.09 
  -2  11   1   31.20    2.12 
  -2  11   1   28.91    2.15 
   1 -11  -1   14.19    1.83 
   1 -11  -1   12.99    1.74 
   1 -11  -1   12.82    1.65 
   1 -11  -1   14.24    1.77 
   1 -11  -1   16.27    1.80 
   1 -11  -1   13.70    1.72 
   1 -11  -1   20.00    2.06 
  -1  11   1   16.76    1.77 
  -1  11   1   16.17    1.68 
  -1  11   1   13.28    1.59 
  -1  11   1   11.73    1.53 
  -1  11   1   11.67    1.53 
  -1  11   1   13.10    1.62 
  -1  11   1   14.17    1.69 
   0 -11  -1    5.99    1.14 
   0 -11  -1    4.61    1.06 
   0 -11  -1    3.70    0.99 
   0 -11  -1    4.62    1.06 
   0 -11  -1    4.41    0.95 
   0 -11  -1    3.29    0.90 
   0 -11  -1    5.77    1.14 
   0  11   1    6.08    1.05 
   0  11   1    6.07    1.09 
   0  11   1    3.87    0.90 
   0  11   1    4.13    0.87 
   0  11   1    6.88    1.10 
   0  11   1    5.59    1.11 
   0  11   1    6.76    1.16 
  -1 -11  -1    6.16    1.20 
  -1 -11  -1    3.47    0.91 
  -1 -11  -1    6.18    1.07 
  -1 -11  -1    5.25    0.99 
  -1 -11  -1    4.16    1.00 
  -1 -11  -1    6.73    1.35 
  -1 -11  -1    3.66    0.98 
   1  11   1    6.99    1.20 
   1  11   1    6.06    1.01 
   1  11   1    4.99    1.02 
   1  11   1    4.42    0.95 
   1  11   1    4.27    0.83 
  -2 -11  -1   23.33    2.44 
  -2 -11  -1   23.27    1.67 
  -2 -11  -1   23.19    2.37 
  -2 -11  -1   21.65    2.37 
  -2 -11  -1   22.93    2.51 
   2  11   1   27.18    2.50 
   2  11   1   26.82    1.90 
   2  11   1   26.34    2.00 
   2  11   1   22.89    1.60 
  -3 -11  -1   16.39    2.05 
  -3 -11  -1   16.96    1.55 
  -3 -11  -1   16.41    2.21 
   3  11   1   16.53    1.24 
   3  11   1   18.91    2.18 
   3  11   1   16.42    1.79 
   3  11   1   13.98    1.82 
  -4 -11  -1    4.61    1.27 
  -4 -11  -1    3.76    1.22 
  -4 -11  -1    2.58    0.96 
   4  11   1    6.11    1.27 
   4  11   1    2.92    0.96 
   4  11   1    4.74    1.04 
  -5 -11  -1   28.68    2.93 
  -5 -11  -1   23.11    2.79 
  -5 -11  -1   27.42    3.01 
   5  11   1   27.81    2.81 
   5  11   1   25.78    2.72 
   5  11   1   26.92    2.51 
  -6 -11  -1    5.18    1.43 
  -6 -11  -1    4.87    1.33 
  -6 -11  -1    3.62    1.23 
   6  11   1    6.47    1.48 
   6  11   1    3.75    1.05 
   6  11   1    2.49    1.04 
  -7 -11  -1    0.71    0.68 
  -7 -11  -1    1.00    0.94 
  -7 -11  -1    0.39    0.75 
   7  11   1    0.50    0.54 
   7  11   1    0.28    0.50 
   7  11   1   -0.03    0.54 
  -8 -11  -1    5.15    1.49 
  -8 -11  -1    7.02    1.70 
  -8 -11  -1    5.32    1.60 
   8  11   1    6.24    1.44 
   8  11   1    5.72    1.55 
   8  11   1    6.06    1.52 
  -9 -11  -1    0.84    0.82 
  -9 -11  -1   -0.39    0.90 
  -9 -11  -1    0.43    0.97 
   9  11   1    0.21    0.74 
   9  11   1    0.60    0.84 
   9  11   1    0.23    0.79 
 -10 -11  -1    8.40    2.25 
 -10 -11  -1    5.42    1.77 
  10  11   1    5.23    1.53 
  10  11   1    4.23    1.48 
  10  11   1    6.29    1.57 
   9 -12  -1    5.34    1.83 
   9 -12  -1    2.70    1.49 
  -9  12   1    2.75    1.42 
  -9  12   1    6.12    2.11 
  -9  12   1    3.30    1.43 
   8 -12  -1   -0.61    0.84 
   8 -12  -1    1.06    1.13 
  -8  12   1    0.15    0.91 
  -8  12   1    0.09    0.65 
   7 -12  -1    0.39    0.76 
   7 -12  -1    1.30    0.92 
  -7  12   1    1.04    0.89 
  -7  12   1    0.87    0.81 
   6 -12  -1   13.32    2.32 
   6 -12  -1   11.66    2.18 
  -6  12   1   12.98    2.17 
  -6  12   1   13.41    2.08 
   5 -12  -1   -0.18    0.59 
   5 -12  -1   -0.52    0.64 
   5 -12  -1    0.88    0.91 
   5 -12  -1   -0.08    0.50 
  -5  12   1   -0.63    0.45 
  -5  12   1    0.65    0.66 
   4 -12  -1   24.91    2.89 
   4 -12  -1   29.57    3.07 
   4 -12  -1   28.01    2.62 
   4 -12  -1   27.96    3.08 
  -4  12   1   28.52    2.11 
  -4  12   1   30.86    3.05 
  -4  12   1   24.99    2.70 
   3 -12  -1   38.47    2.96 
   3 -12  -1   37.93    2.33 
   3 -12  -1   37.60    2.84 
   3 -12  -1   32.27    3.14 
   3 -12  -1   31.22    2.39 
  -3  12   1   38.43    2.52 
  -3  12   1   35.26    2.74 
  -3  12   1   35.28    2.21 
  -3  12   1   42.07    2.76 
  -3  12   1   41.81    2.83 
   2 -12  -1   11.41    1.82 
   2 -12  -1   12.63    1.81 
   2 -12  -1   15.33    2.02 
   2 -12  -1   11.76    1.57 
   2 -12  -1   13.59    1.90 
   2 -12  -1   17.04    1.93 
   2 -12  -1   14.21    1.84 
  -2  12   1   12.48    1.73 
  -2  12   1   12.03    1.77 
  -2  12   1   11.84    1.68 
  -2  12   1   16.58    1.94 
  -2  12   1   14.20    1.60 
   1 -12  -1   19.34    2.16 
   1 -12  -1   13.96    1.90 
   1 -12  -1   15.56    1.86 
   1 -12  -1   14.86    1.84 
   1 -12  -1   16.66    1.95 
   1 -12  -1   10.94    1.70 
   1 -12  -1   17.02    2.07 
  -1  12   1   15.24    1.88 
  -1  12   1   15.65    1.84 
  -1  12   1   14.31    1.74 
  -1  12   1   19.68    2.06 
  -1  12   1   15.85    1.79 
  -1  12   1   13.48    1.65 
  -1  12   1   15.76    1.88 
   0 -12  -1    1.26    0.66 
   0 -12  -1    0.19    0.50 
   0 -12  -1    0.44    0.55 
   0 -12  -1    0.04    0.53 
   0 -12  -1   -0.09    0.44 
   0 -12  -1    0.03    0.40 
   0 -12  -1    0.11    0.44 
   0  12   1   -0.06    0.38 
   0  12   1    0.26    0.48 
   0  12   1   -0.52    0.32 
   0  12   1   -0.46    0.34 
   0  12   1    0.08    0.44 
   0  12   1   -0.14    0.39 
   0  12   1   -0.12    0.38 
  -1 -12  -1   24.95    2.70 
  -1 -12  -1   27.70    2.60 
  -1 -12  -1   22.79    2.20 
  -1 -12  -1   21.59    2.35 
  -1 -12  -1   24.68    1.88 
  -1 -12  -1   25.55    2.54 
  -1 -12  -1   24.80    2.61 
   1  12   1   22.84    1.79 
   1  12   1   29.33    2.64 
   1  12   1   28.74    2.04 
   1  12   1   26.29    2.43 
   1  12   1   23.97    1.78 
  -2 -12  -1   21.24    2.52 
  -2 -12  -1   19.34    2.27 
  -2 -12  -1   18.81    2.36 
  -2 -12  -1   23.91    1.75 
   2  12   1   19.93    2.22 
   2  12   1   22.22    2.14 
   2  12   1   20.51    1.57 
   2  12   1   17.93    2.09 
  -3 -12  -1    0.30    0.59 
  -3 -12  -1   -0.51    0.47 
  -3 -12  -1    0.67    0.49 
  -3 -12  -1   -0.63    0.47 
   3  12   1    0.12    0.40 
   3  12   1   -0.38    0.46 
   3  12   1    0.23    0.45 
  -4 -12  -1   16.49    2.33 
  -4 -12  -1   15.82    2.17 
  -4 -12  -1   15.01    2.34 
   4  12   1   13.75    1.97 
   4  12   1   15.46    1.85 
   4  12   1   14.27    2.02 
  -5 -12  -1   15.57    2.41 
  -5 -12  -1   19.08    2.47 
  -5 -12  -1   15.51    2.32 
   5  12   1   14.10    1.85 
   5  12   1   17.47    2.32 
   5  12   1   14.88    2.14 
  -6 -12  -1    7.49    1.70 
  -6 -12  -1    5.78    1.61 
  -6 -12  -1    5.06    1.33 
   6  12   1    4.92    1.41 
   6  12   1    3.63    1.05 
   6  12   1    4.10    1.17 
  -7 -12  -1    9.38    1.92 
  -7 -12  -1    9.69    2.07 
  -7 -12  -1    5.85    1.57 
   7  12   1    7.74    1.67 
   7  12   1    8.36    1.52 
   7  12   1    7.19    1.66 
  -8 -12  -1    0.89    0.95 
  -8 -12  -1   -0.32    0.71 
  -8 -12  -1   -0.07    0.82 
   8  12   1    0.08    0.66 
   8  12   1    1.89    0.99 
   8  12   1    0.89    0.78 
  -9 -12  -1    2.34    1.31 
  -9 -12  -1    1.50    1.26 
  -9 -12  -1    1.91    1.11 
   9  12   1    3.81    1.35 
   9  12   1    4.03    2.02 
   9  12   1    1.86    1.04 
   8 -13  -1    2.19    1.47 
   8 -13  -1    3.21    1.32 
  -8  13   1    2.23    1.11 
  -8  13   1    5.47    1.74 
  -8  13   1    3.09    1.32 
   7 -13  -1    3.67    1.47 
   7 -13  -1    1.92    1.25 
  -7  13   1    1.44    1.05 
  -7  13   1    0.56    0.60 
  -7  13   1    3.99    1.38 
   6 -13  -1   -0.64    0.50 
   6 -13  -1    0.48    0.90 
  -6  13   1   -0.12    0.50 
  -6  13   1    0.52    0.69 
  -6  13   1    0.28    0.65 
   5 -13  -1   12.15    2.18 
   5 -13  -1    9.74    2.07 
   5 -13  -1   11.37    2.08 
  -5  13   1   11.61    1.96 
  -5  13   1    9.92    1.93 
  -5  13   1    8.35    1.66 
   4 -13  -1    4.60    1.32 
   4 -13  -1    5.25    1.42 
   4 -13  -1    2.55    0.94 
   4 -13  -1    4.00    1.29 
  -4  13   1    4.16    1.22 
  -4  13   1    2.87    1.05 
  -4  13   1    3.50    1.09 
   3 -13  -1   10.49    1.89 
   3 -13  -1    8.58    1.50 
   3 -13  -1    8.90    1.73 
   3 -13  -1    8.57    1.66 
  -3  13   1    9.49    1.72 
  -3  13   1   12.72    1.86 
  -3  13   1    7.60    1.36 
  -3  13   1    8.43    1.56 
   2 -13  -1   24.01    2.67 
   2 -13  -1   29.90    2.96 
   2 -13  -1   33.69    3.14 
   2 -13  -1   27.20    2.57 
   2 -13  -1   21.54    2.52 
   2 -13  -1   25.86    2.62 
   2 -13  -1   27.81    2.13 
  -2  13   1   25.52    2.62 
  -2  13   1   25.40    2.34 
  -2  13   1   26.52    2.62 
  -2  13   1   25.81    2.00 
  -2  13   1   26.15    2.61 
  -2  13   1   24.00    2.46 
   1 -13  -1   -0.48    0.42 
   1 -13  -1   -0.10    0.51 
   1 -13  -1    0.67    0.60 
   1 -13  -1    0.09    0.54 
   1 -13  -1    0.22    0.54 
   1 -13  -1   -0.45    0.51 
   1 -13  -1   -0.22    0.42 
  -1  13   1   -0.73    0.35 
  -1  13   1   -0.59    0.31 
  -1  13   1    0.73    0.61 
  -1  13   1   -0.05    0.43 
  -1  13   1    0.02    0.47 
  -1  13   1    0.43    0.47 
  -1  13   1    0.16    0.42 
   0 -13  -1   25.58    2.50 
   0 -13  -1   32.75    2.89 
   0 -13  -1   31.40    2.40 
   0 -13  -1   26.98    2.71 
   0 -13  -1   31.69    2.95 
   0 -13  -1   30.35    2.96 
   0 -13  -1   27.64    2.72 
   0  13   1   28.48    2.13 
   0  13   1   22.62    2.37 
   0  13   1   24.57    2.41 
   0  13   1   26.94    2.68 
   0  13   1   25.39    2.44 
   0  13   1   25.43    2.51 
   0  13   1   26.95    2.46 
  -1 -13  -1   13.10    1.68 
  -1 -13  -1    8.48    1.60 
  -1 -13  -1    9.01    1.61 
  -1 -13  -1    9.94    1.68 
  -1 -13  -1   13.46    1.74 
  -1 -13  -1   10.66    1.83 
   1  13   1    8.75    1.46 
   1  13   1    9.66    1.47 
   1  13   1    9.04    1.36 
   1  13   1    6.67    1.35 
   1  13   1   10.01    1.41 
  -2 -13  -1    8.39    1.29 
  -2 -13  -1    7.76    1.52 
  -2 -13  -1   10.79    1.82 
  -2 -13  -1    7.31    1.65 
   2  13   1    8.03    1.22 
   2  13   1    8.04    1.36 
   2  13   1    8.30    1.21 
   2  13   1    5.54    1.31 
   2  13   1   10.51    1.63 
  -3 -13  -1   16.87    2.30 
  -3 -13  -1   19.17    2.60 
  -3 -13  -1   16.46    2.31 
   3  13   1   15.29    2.10 
   3  13   1   19.28    2.08 
   3  13   1   14.27    1.98 
  -4 -13  -1    3.16    1.14 
  -4 -13  -1    3.79    1.31 
  -4 -13  -1    1.53    0.84 
   4  13   1    3.92    1.15 
   4  13   1    2.73    1.00 
   4  13   1    2.65    0.83 
  -5 -13  -1    7.65    1.69 
  -5 -13  -1    4.74    1.39 
  -5 -13  -1    8.55    1.84 
   5  13   1    4.82    1.33 
   5  13   1    7.14    1.35 
   5  13   1    6.39    1.48 
  -6 -13  -1    9.60    2.01 
  -6 -13  -1   14.78    2.31 
  -6 -13  -1   15.50    2.53 
   6  13   1   13.38    1.93 
   6  13   1   12.05    2.10 
   6  13   1    8.50    1.74 
  -7 -13  -1    0.62    0.84 
  -7 -13  -1    0.32    0.64 
  -7 -13  -1    0.43    0.82 
   7  13   1    0.88    0.75 
   7  13   1   -0.19    0.50 
   7  13   1    1.02    0.89 
  -8 -13  -1    5.98    1.90 
  -8 -13  -1    6.16    1.75 
  -8 -13  -1   10.10    2.10 
   8  13   1   11.50    2.22 
   8  13   1   11.25    2.12 
  -9 -13  -1    3.96    1.51 
  -9 -13  -1    2.25    1.41 
  -9 -13  -1    2.84    1.20 
   9  13   1    3.17    1.35 
   9  13   1    1.70    0.95 
   7 -14  -1    1.68    1.08 
   7 -14  -1    0.38    0.86 
  -7  14   1    2.16    1.09 
  -7  14   1    0.61    0.97 
  -7  14   1    1.59    0.95 
   6 -14  -1    0.04    0.79 
   6 -14  -1    0.71    0.94 
  -6  14   1    0.85    0.96 
  -6  14   1    2.00    1.17 
  -6  14   1    1.74    1.09 
   5 -14  -1    1.53    0.90 
   5 -14  -1    0.21    0.60 
   5 -14  -1   -0.27    0.70 
  -5  14   1    0.36    0.63 
  -5  14   1   -0.52    0.61 
  -5  14   1   -0.26    0.47 
   4 -14  -1   12.25    2.16 
   4 -14  -1   16.37    2.43 
   4 -14  -1   13.91    2.37 
  -4  14   1   13.44    2.15 
  -4  14   1   16.97    2.28 
  -4  14   1   18.24    2.44 
   3 -14  -1   10.30    1.86 
   3 -14  -1   12.08    1.84 
   3 -14  -1   15.86    2.34 
   3 -14  -1   12.99    2.12 
  -3  14   1   16.70    2.04 
  -3  14   1   14.23    2.06 
  -3  14   1   12.13    1.91 
  -3  14   1   12.06    1.95 
   2 -14  -1    0.26    0.67 
   2 -14  -1    0.29    0.69 
   2 -14  -1    0.85    0.76 
   2 -14  -1   -0.02    0.57 
   2 -14  -1    0.68    0.68 
   2 -14  -1    0.31    0.72 
   2 -14  -1    1.30    0.85 
  -2  14   1   -0.25    0.50 
  -2  14   1   -0.30    0.46 
  -2  14   1    0.50    0.59 
  -2  14   1    1.17    0.76 
  -2  14   1   -0.56    0.43 
  -2  14   1    1.27    0.66 
  -2  14   1    0.21    0.53 
   1 -14  -1    7.70    1.52 
   1 -14  -1    5.47    1.33 
   1 -14  -1    6.72    1.39 
   1 -14  -1    4.96    1.26 
   1 -14  -1    6.89    1.47 
   1 -14  -1    6.63    1.43 
   1 -14  -1    6.68    1.47 
  -1  14   1    6.69    1.32 
  -1  14   1    6.69    1.27 
  -1  14   1    7.39    1.43 
  -1  14   1    6.30    1.29 
  -1  14   1    7.31    1.34 
  -1  14   1    9.12    1.54 
  -1  14   1    3.77    1.08 
   0 -14  -1    2.06    0.85 
   0 -14  -1    0.53    0.63 
   0 -14  -1    1.69    0.77 
   0 -14  -1    1.22    0.76 
   0 -14  -1    0.62    0.66 
   0 -14  -1    1.87    0.82 
   0 -14  -1    0.05    0.58 
   0  14   1    1.87    0.84 
   0  14   1    0.87    0.66 
   0  14   1    1.44    0.74 
   0  14   1    1.73    0.75 
   0  14   1    1.67    0.81 
   0  14   1    2.05    0.80 
   0  14   1    2.73    0.90 
  -1 -14  -1    7.87    1.54 
  -1 -14  -1   10.15    1.75 
  -1 -14  -1    8.33    1.50 
  -1 -14  -1    7.75    1.36 
  -1 -14  -1    9.99    1.71 
  -1 -14  -1    8.81    1.75 
   1  14   1    8.97    1.52 
   1  14   1    6.35    1.30 
   1  14   1   10.39    1.71 
   1  14   1    8.30    1.34 
   1  14   1    8.94    1.44 
   1  14   1   11.39    1.81 
  -2 -14  -1   12.88    2.19 
  -2 -14  -1   13.19    2.09 
  -2 -14  -1   15.90    2.29 
   2  14   1   18.00    2.05 
   2  14   1   14.10    2.02 
   2  14   1   14.80    2.01 
  -3 -14  -1    0.15    0.59 
  -3 -14  -1    0.48    0.67 
  -3 -14  -1   -0.79    0.55 
   3  14   1   -0.21    0.53 
   3  14   1    0.34    0.59 
   3  14   1    0.31    0.64 
  -4 -14  -1    5.84    1.48 
  -4 -14  -1    3.82    1.38 
  -4 -14  -1    5.06    1.50 
   4  14   1    5.78    1.51 
   4  14   1    3.95    1.05 
   4  14   1    4.65    1.22 
  -5 -14  -1    0.49    0.98 
  -5 -14  -1    0.89    0.76 
  -5 -14  -1    3.57    1.31 
   5  14   1    2.96    1.15 
   5  14   1    2.81    0.94 
   5  14   1    2.88    1.13 
  -6 -14  -1    3.05    1.24 
  -6 -14  -1    1.78    1.13 
  -6 -14  -1    1.97    1.06 
   6  14   1    0.40    0.68 
   6  14   1    1.32    0.76 
  -7 -14  -1   14.14    2.59 
  -7 -14  -1   17.56    2.99 
  -7 -14  -1   13.12    2.37 
   7  14   1   13.67    2.38 
   7  14   1   12.45    2.24 
  -8 -14  -1    3.00    1.56 
  -8 -14  -1    4.67    1.59 
  -8 -14  -1    4.33    1.66 
   8  14   1    1.19    0.96 
   8  14   1    5.42    1.62 
   7 -15  -1    6.46    1.99 
  -7  15   1    6.71    2.28 
  -7  15   1    6.86    1.81 
  -7  15   1    5.35    1.88 
   6 -15  -1    7.23    1.89 
   6 -15  -1    4.74    1.72 
  -6  15   1    4.35    1.44 
  -6  15   1    5.10    1.55 
  -6  15   1    4.38    1.55 
   5 -15  -1    2.02    1.23 
   5 -15  -1    3.99    1.29 
  -5  15   1    5.18    1.46 
  -5  15   1    3.48    1.20 
  -5  15   1    4.80    1.48 
   4 -15  -1    1.39    1.06 
   4 -15  -1    1.56    0.99 
   4 -15  -1    2.34    1.15 
  -4  15   1    0.57    0.58 
  -4  15   1    1.11    0.93 
  -4  15   1    1.57    0.94 
   3 -15  -1    6.17    1.58 
   3 -15  -1    5.50    1.50 
   3 -15  -1    3.51    1.28 
  -3  15   1    2.17    1.03 
  -3  15   1    3.88    1.11 
  -3  15   1    3.09    1.09 
   2 -15  -1   22.51    2.76 
   2 -15  -1   24.84    2.87 
   2 -15  -1   16.84    2.24 
   2 -15  -1   17.36    2.41 
   2 -15  -1   16.98    2.45 
  -2  15   1   18.85    2.54 
  -2  15   1   19.23    2.37 
  -2  15   1   20.67    2.53 
  -2  15   1   15.43    2.12 
  -2  15   1   18.76    2.31 
  -2  15   1   18.91    2.39 
  -2  15   1   16.28    2.02 
   1 -15  -1    7.59    1.53 
   1 -15  -1    3.96    1.17 
   1 -15  -1    6.16    1.46 
   1 -15  -1    5.90    1.43 
   1 -15  -1    2.29    1.05 
   1 -15  -1    2.90    1.00 
   1 -15  -1    5.25    1.35 
  -1  15   1    4.87    1.20 
  -1  15   1    6.52    1.37 
  -1  15   1    4.18    1.17 
  -1  15   1    4.69    1.17 
  -1  15   1    4.64    1.18 
  -1  15   1    3.22    1.05 
  -1  15   1    4.06    1.07 
   0 -15  -1    9.94    1.85 
   0 -15  -1   10.73    1.77 
   0 -15  -1    9.66    1.79 
   0 -15  -1   11.45    1.82 
   0 -15  -1    8.49    1.67 
   0 -15  -1   11.46    1.89 
   0 -15  -1    7.97    1.60 
   0  15   1   12.22    1.79 
   0  15   1   11.80    1.86 
   0  15   1    9.95    1.64 
   0  15   1   10.99    1.77 
   0  15   1   10.60    1.65 
   0  15   1   10.18    1.66 
   0  15   1    9.86    1.81 
  -1 -15  -1   15.87    2.05 
  -1 -15  -1   15.42    2.29 
  -1 -15  -1   14.06    2.16 
  -1 -15  -1   12.16    2.11 
  -1 -15  -1   15.21    2.20 
   1  15   1   18.19    2.18 
   1  15   1   18.97    2.09 
   1  15   1   17.47    2.18 
   1  15   1   22.52    2.60 
   1  15   1   15.39    2.25 
   1  15   1   15.32    2.10 
  -2 -15  -1    4.41    1.29 
  -2 -15  -1    1.83    0.91 
  -2 -15  -1    2.32    1.16 
   2  15   1    2.02    0.85 
   2  15   1    2.38    0.90 
   2  15   1    1.21    0.73 
  -3 -15  -1    2.72    1.27 
  -3 -15  -1    4.45    1.32 
  -3 -15  -1    7.02    1.71 
   3  15   1    3.54    1.18 
   3  15   1    4.69    1.16 
   3  15   1    5.56    1.34 
  -4 -15  -1    6.31    1.70 
  -4 -15  -1    0.97    1.08 
  -4 -15  -1    4.97    1.49 
   4  15   1    2.91    1.20 
   4  15   1    3.47    1.13 
   4  15   1    1.93    0.95 
  -5 -15  -1    4.53    1.52 
  -5 -15  -1    4.08    1.43 
  -5 -15  -1    2.55    1.24 
   5  15   1    3.12    1.11 
   5  15   1    2.34    1.21 
  -6 -15  -1    3.33    1.43 
  -6 -15  -1    3.09    1.44 
  -6 -15  -1    2.11    1.14 
   6  15   1    1.74    1.11 
   6  15   1    2.42    1.20 
  -7 -15  -1    3.06    1.27 
  -7 -15  -1    0.97    0.97 
  -7 -15  -1   -0.27    0.89 
   7  15   1    0.81    0.88 
   7  15   1    1.01    0.92 
   6 -16  -1    0.38    0.86 
   6 -16  -1   -1.26    0.85 
  -6  16   1    0.14    0.92 
  -6  16   1   -1.47    0.70 
  -6  16   1    0.28    0.89 
   5 -16  -1    1.64    1.07 
   5 -16  -1    5.21    1.80 
  -5  16   1    2.82    1.19 
  -5  16   1    8.18    1.92 
  -5  16   1    2.98    1.28 
   4 -16  -1   -0.14    0.88 
   4 -16  -1   -0.11    0.80 
   4 -16  -1   -0.64    0.75 
  -4  16   1    2.15    1.03 
  -4  16   1    0.41    0.90 
  -4  16   1    0.61    0.84 
   3 -16  -1    8.08    1.88 
   3 -16  -1    7.66    1.75 
   3 -16  -1   10.63    2.06 
  -3  16   1    6.56    1.59 
  -3  16   1    8.89    1.69 
  -3  16   1    8.87    1.80 
  -3  16   1    8.55    1.80 
   2 -16  -1    0.05    0.63 
   2 -16  -1    1.17    0.85 
   2 -16  -1    0.98    0.90 
  -2  16   1   -0.41    0.57 
  -2  16   1   -0.32    0.64 
  -2  16   1   -0.14    0.58 
  -2  16   1    0.96    0.74 
  -2  16   1    0.44    0.82 
   1 -16  -1   13.97    2.17 
   1 -16  -1   13.88    2.18 
   1 -16  -1   13.93    2.24 
   1 -16  -1   14.19    2.28 
   1 -16  -1   10.70    1.92 
   1 -16  -1   12.39    2.13 
   1 -16  -1   11.00    1.88 
  -1  16   1   14.59    2.02 
  -1  16   1   10.62    1.81 
  -1  16   1   11.85    1.91 
  -1  16   1   11.12    1.82 
  -1  16   1   16.13    2.21 
  -1  16   1   10.77    1.80 
  -1  16   1   13.17    1.89 
   0 -16  -1    6.78    1.54 
   0 -16  -1    5.22    1.38 
   0 -16  -1    7.15    1.54 
   0 -16  -1    4.57    1.33 
   0 -16  -1    6.83    1.50 
   0 -16  -1    7.10    1.72 
   0 -16  -1    9.37    1.86 
   0  16   1    6.50    1.53 
   0  16   1    9.41    1.62 
   0  16   1    3.97    1.08 
   0  16   1    7.36    1.46 
   0  16   1    4.92    1.25 
   0  16   1    8.22    1.59 
   0  16   1    3.41    1.07 
  -1 -16  -1    8.75    1.75 
  -1 -16  -1    8.28    1.72 
  -1 -16  -1   10.20    1.99 
   1  16   1    7.64    1.50 
   1  16   1    5.94    1.37 
   1  16   1    7.81    1.61 
   1  16   1    8.06    1.62 
   1  16   1    6.73    1.53 
  -2 -16  -1   23.88    3.13 
  -2 -16  -1   24.22    3.04 
  -2 -16  -1   26.82    3.10 
   2  16   1   28.41    3.99 
   2  16   1   21.91    2.73 
   2  16   1   29.26    3.27 
   2  16   1   29.55    3.05 
  -3 -16  -1    7.61    1.91 
  -3 -16  -1    9.65    1.97 
  -3 -16  -1   10.53    2.06 
   3  16   1    6.17    1.60 
   3  16   1    3.81    1.23 
  -4 -16  -1    0.31    0.72 
  -4 -16  -1   -0.19    0.53 
  -4 -16  -1   -0.29    0.91 
   4  16   1    0.12    0.70 
   4  16   1    0.48    0.67 
  -5 -16  -1    0.43    1.01 
  -5 -16  -1   -0.59    0.75 
  -5 -16  -1    0.27    0.74 
   5  16   1    0.88    0.83 
   5  16   1   -0.05    0.57 
  -6 -16  -1    1.80    1.21 
  -6 -16  -1    1.65    1.13 
  -6 -16  -1    0.72    1.10 
   6  16   1    1.42    1.16 
   6  16   1    0.97    0.93 
   4 -17  -1    5.21    1.65 
   4 -17  -1    3.40    1.52 
   4 -17  -1    4.96    1.62 
  -4  17   1    4.07    1.38 
  -4  17   1    4.45    1.56 
  -4  17   1    5.47    1.57 
   3 -17  -1   -0.98    0.80 
   3 -17  -1   -0.41    0.85 
   3 -17  -1    0.88    1.01 
  -3  17   1    0.22    0.70 
  -3  17   1    0.58    0.72 
  -3  17   1   -0.17    0.75 
  -3  17   1   -0.82    0.54 
   2 -17  -1    5.43    1.61 
   2 -17  -1   10.72    2.11 
   2 -17  -1    8.65    1.84 
  -2  17   1    9.38    1.89 
  -2  17   1   11.08    1.93 
  -2  17   1   10.63    1.87 
  -2  17   1    8.79    1.78 
   1 -17  -1    0.42    0.82 
   1 -17  -1    1.05    0.97 
   1 -17  -1    0.01    0.72 
   1 -17  -1    1.08    1.02 
   1 -17  -1    0.24    0.73 
   1 -17  -1    1.66    1.02 
  -1  17   1    0.08    0.77 
  -1  17   1    0.19    0.70 
  -1  17   1    0.03    0.67 
  -1  17   1    1.20    0.90 
  -1  17   1    0.79    0.82 
  -1  17   1   -0.69    0.52 
  -1  17   1   -0.41    0.58 
   0 -17  -1    5.04    1.38 
   0 -17  -1    6.99    1.67 
   0 -17  -1    7.22    1.73 
   0 -17  -1    8.47    1.85 
   0  17   1    7.83    1.67 
   0  17   1    4.96    1.28 
   0  17   1    5.96    1.54 
   0  17   1    9.75    1.81 
  -1 -17  -1    4.51    1.44 
  -1 -17  -1    5.84    1.51 
  -1 -17  -1    2.90    1.24 
   1  17   1    5.77    1.37 
   1  17   1    3.58    1.28 
   1  17   1    3.75    1.23 
   1  17   1    5.42    1.42 
  -2 -17  -1    0.31    0.91 
  -2 -17  -1    0.52    0.69 
  -2 -17  -1   -0.07    0.66 
   2  17   1    0.35    0.77 
   2  17   1    0.64    0.77 
   2  17   1    1.83    1.05 
  -3 -17  -1   13.86    2.58 
  -3 -17  -1   15.08    2.52 
  -3 -17  -1   18.46    2.72 
   3  17   1   17.02    2.57 
   3  17   1   18.44    2.83 
   3  17   1   14.66    2.23 
  -4 -17  -1    6.95    2.08 
  -4 -17  -1    5.43    1.76 
  -4 -17  -1    7.63    1.93 
   4  17   1    4.79    1.40 
   4  17   1    8.05    1.90 
  -5 -17  -1    2.62    1.35 
  -5 -17  -1    0.40    0.94 
  -5 -17  -1    1.05    1.03 
   5  17   1   -0.59    0.65 
   5  17   1    0.15    0.94 
   3 -18  -1    6.72    1.88 
   3 -18  -1    5.55    1.85 
  -3  18   1    8.47    1.92 
  -3  18   1    5.92    1.61 
   2 -18  -1    2.68    1.30 
   2 -18  -1    1.48    1.08 
  -2  18   1    1.74    0.97 
  -2  18   1    1.57    1.00 
  -2  18   1    1.74    1.24 
   1 -18  -1    3.73    1.72 
  -1  18   1    6.80    1.77 
  -1  18   1    1.38    0.96 
   0 -18  -1    4.26    1.42 
   0 -18  -1    0.16    0.89 
   0 -18  -1    1.28    1.02 
   0  18   1    1.91    1.08 
   0  18   1    1.00    0.77 
   0  18   1    0.30    0.73 
   0  18   1    3.02    1.24 
  -1 -18  -1    3.11    1.34 
  -1 -18  -1    2.58    1.20 
  -1 -18  -1    4.99    1.66 
   1  18   1    3.78    1.32 
   1  18   1    3.92    1.36 
   1  18   1    5.26    1.37 
   1  18   1    3.57    1.21 
  -2 -18  -1    4.93    1.66 
  -2 -18  -1    9.79    2.35 
  -2 -18  -1    8.37    1.92 
   2  18   1    7.23    1.80 
   2  18   1    4.74    1.41 
   2  18   1    3.95    1.26 
  -3 -18  -1    5.02    1.64 
  -3 -18  -1    3.88    1.55 
   3  18   1    4.49    1.51 
   3  18   1    3.98    1.41 
   3  18   1    4.03    1.26 
  -4 -18  -1    3.76    1.40 
  -4 -18  -1    4.26    1.58 
   4  18   1    5.28    1.64 
   4  18   1    1.64    1.11 
   4  18   1    2.47    1.24 
   3  18  -2    1.22    1.11 
   3  18  -2    0.11    0.81 
   3  18  -2   -0.39    0.69 
  -3 -18   2    1.42    1.19 
  -3 -18   2   -0.24    0.70 
   2  18  -2    1.14    1.18 
   2  18  -2    4.50    1.46 
  -2 -18   2    2.70    1.43 
  -2 -18   2    4.66    1.64 
   1  18  -2    2.68    1.19 
   1  18  -2    1.18    1.08 
   1  18  -2    6.72    1.77 
  -1 -18   2    2.82    1.40 
  -1 -18   2    3.23    1.34 
   0  18  -2    1.01    1.05 
   0  18  -2    1.87    1.21 
   0  18  -2    2.06    1.05 
   0  18  -2   -0.16    0.91 
   0 -18   2    1.20    1.06 
   0 -18   2    1.07    1.12 
  -1  18  -2    2.68    1.23 
  -1  18  -2    1.22    0.90 
  -1  18  -2    0.30    0.85 
   1 -18   2    1.58    1.10 
   1 -18   2    0.23    1.02 
  -2  18  -2    1.83    1.11 
  -2  18  -2    2.15    1.28 
  -2  18  -2    0.93    0.93 
   2 -18   2   -0.71    0.89 
   2 -18   2    0.52    1.10 
   5  17  -2    0.52    0.99 
   5  17  -2    1.19    1.03 
   5  17  -2   -0.41    0.45 
  -5 -17   2    0.08    1.24 
  -5 -17   2    0.60    1.15 
   4  17  -2    4.75    1.58 
   4  17  -2    4.47    1.58 
   4  17  -2    2.34    1.13 
  -4 -17   2    3.09    1.39 
  -4 -17   2    6.40    2.00 
   3  17  -2    4.37    1.41 
   3  17  -2    8.22    1.78 
   3  17  -2    4.54    1.49 
  -3 -17   2    7.01    1.89 
  -3 -17   2    6.49    1.82 
   2  17  -2    0.66    0.91 
   2  17  -2    0.12    0.80 
   2  17  -2   -0.70    0.61 
  -2 -17   2    1.14    1.19 
  -2 -17   2   -0.84    0.69 
   1  17  -2    0.91    0.92 
   1  17  -2    1.90    1.14 
   1  17  -2    1.44    0.90 
  -1 -17   2    0.49    0.98 
  -1 -17   2    1.18    1.08 
   0  17  -2    5.09    1.45 
   0  17  -2    6.40    1.72 
   0  17  -2    3.00    1.20 
   0  17  -2    4.98    1.32 
   0 -17   2    4.71    1.60 
   0 -17   2    7.13    1.65 
   0 -17   2    7.18    1.93 
  -1  17  -2    1.20    0.86 
  -1  17  -2   -0.49    0.61 
  -1  17  -2    1.18    0.92 
   1 -17   2   -0.85    0.68 
   1 -17   2    0.51    0.86 
  -2  17  -2    0.28    0.74 
  -2  17  -2    3.19    1.19 
  -2  17  -2    1.51    0.82 
  -2  17  -2    1.34    0.93 
   2 -17   2    1.73    1.02 
   2 -17   2    4.92    1.57 
   2 -17   2    1.38    1.06 
  -3  17  -2    0.25    0.71 
  -3  17  -2   -0.35    0.61 
  -3  17  -2    0.59    0.88 
   3 -17   2   -0.76    0.69 
   3 -17   2   -0.70    0.83 
  -4  17  -2   11.71    2.24 
  -4  17  -2    6.97    1.80 
  -4  17  -2    6.56    1.81 
   4 -17   2    5.95    1.78 
   4 -17   2    8.46    2.07 
   6  16  -2    0.61    0.80 
   6  16  -2    1.24    1.00 
  -6 -16   2    0.20    0.79 
  -6 -16   2    0.94    1.22 
   5  16  -2    4.30    1.43 
   5  16  -2    3.54    1.21 
  -5 -16   2    1.57    1.24 
  -5 -16   2    3.44    1.52 
   4  16  -2    3.38    1.21 
   4  16  -2    4.30    1.44 
   4  16  -2    3.00    1.07 
  -4 -16   2    2.57    1.37 
  -4 -16   2    3.84    1.46 
   3  16  -2    0.53    0.90 
   3  16  -2    3.89    1.36 
   3  16  -2    1.79    1.02 
  -3 -16   2    1.31    0.91 
  -3 -16   2    0.28    0.86 
   2  16  -2   14.36    2.25 
   2  16  -2   13.72    2.03 
   2  16  -2   14.90    2.51 
  -2 -16   2   15.61    2.68 
  -2 -16   2   16.61    2.66 
   1  16  -2   13.27    2.18 
   1  16  -2   10.49    1.74 
   1  16  -2   13.50    2.31 
   1  16  -2   13.08    2.18 
  -1 -16   2   17.04    2.68 
  -1 -16   2   13.32    2.41 
  -1 -16   2   13.21    2.06 
   0  16  -2    0.71    0.69 
   0  16  -2    0.13    0.69 
   0  16  -2    0.11    0.63 
   0  16  -2    0.26    0.68 
   0 -16   2   -0.10    0.68 
   0 -16   2    0.13    0.80 
   0 -16   2   -0.11    0.66 
  -1  16  -2    1.70    0.79 
  -1  16  -2    3.11    1.06 
  -1  16  -2    5.16    1.48 
  -1  16  -2    2.14    0.94 
  -1  16  -2    1.99    1.02 
   1 -16   2    2.95    1.10 
   1 -16   2    3.93    1.34 
   1 -16   2    2.69    1.30 
  -2  16  -2   -0.22    0.66 
  -2  16  -2    0.93    0.71 
  -2  16  -2    0.80    0.74 
  -2  16  -2    1.34    0.87 
   2 -16   2    0.63    0.90 
   2 -16   2    0.11    0.66 
   2 -16   2    0.95    0.81 
  -3  16  -2    4.76    1.34 
  -3  16  -2    5.58    1.51 
  -3  16  -2    4.70    1.44 
   3 -16   2    4.29    1.52 
   3 -16   2    4.13    1.35 
  -4  16  -2    3.91    1.27 
  -4  16  -2   -1.01    0.50 
   4 -16   2    1.92    1.20 
   4 -16   2    0.94    0.93 
  -5  16  -2    1.07    0.92 
  -5  16  -2    0.61    0.90 
   5 -16   2    1.32    1.10 
   5 -16   2    1.24    1.11 
   7  15  -2    1.81    1.23 
   7  15  -2    0.40    0.92 
  -7 -15   2    2.51    1.41 
  -7 -15   2    2.19    1.49 
   6  15  -2    0.24    0.75 
   6  15  -2   -0.35    0.83 
  -6 -15   2    0.76    0.89 
  -6 -15   2    1.78    1.30 
   5  15  -2    1.80    1.12 
   5  15  -2    2.15    1.05 
  -5 -15   2    1.43    1.13 
  -5 -15   2    0.69    0.97 
   4  15  -2    3.93    1.32 
   4  15  -2    2.31    1.16 
   4  15  -2    2.12    1.02 
  -4 -15   2    2.15    1.05 
  -4 -15   2    3.10    1.24 
   3  15  -2   13.27    2.02 
   3  15  -2   11.27    2.04 
   3  15  -2   12.09    2.18 
  -3 -15   2   10.29    2.14 
  -3 -15   2   12.14    2.22 
   2  15  -2    1.54    0.80 
   2  15  -2    1.32    0.91 
   2  15  -2    4.27    1.35 
  -2 -15   2    1.76    0.87 
  -2 -15   2    3.54    1.34 
  -2 -15   2    1.30    0.93 
   1  15  -2   13.19    1.83 
   1  15  -2   12.24    2.10 
   1  15  -2   14.61    2.12 
  -1 -15   2   13.06    1.99 
  -1 -15   2   14.35    2.40 
  -1 -15   2    9.23    1.87 
   0  15  -2   19.33    2.54 
   0  15  -2   19.65    2.55 
   0  15  -2   15.54    1.93 
   0  15  -2   17.50    2.09 
   0  15  -2   18.39    2.33 
   0 -15   2   16.51    2.49 
   0 -15   2   19.93    2.50 
   0 -15   2   17.69    2.56 
   0 -15   2   17.10    2.52 
  -1  15  -2    0.03    0.59 
  -1  15  -2   -0.03    0.58 
  -1  15  -2    0.45    0.55 
  -1  15  -2    0.07    0.75 
  -1  15  -2    0.16    0.57 
   1 -15   2   -0.33    0.64 
   1 -15   2   -0.73    0.50 
   1 -15   2   -0.25    0.66 
   1 -15   2   -0.21    0.53 
  -2  15  -2    7.19    1.52 
  -2  15  -2    5.14    1.38 
  -2  15  -2   12.07    2.07 
   2 -15   2   12.16    2.02 
   2 -15   2    9.94    1.86 
   2 -15   2   13.92    2.22 
  -3  15  -2    3.08    1.11 
  -3  15  -2    2.23    1.05 
  -3  15  -2    2.11    1.06 
   3 -15   2    3.12    1.28 
   3 -15   2    1.33    0.88 
   3 -15   2    2.19    1.08 
  -4  15  -2    3.52    1.26 
  -4  15  -2    5.96    1.45 
  -4  15  -2    4.06    1.31 
   4 -15   2    4.48    1.39 
   4 -15   2    4.70    1.49 
   4 -15   2    4.86    1.39 
  -5  15  -2    4.43    1.47 
  -5  15  -2    3.03    1.25 
   5 -15   2    2.67    1.23 
   5 -15   2    2.31    1.32 
   5 -15   2    3.32    1.31 
  -6  15  -2    0.33    1.04 
  -6  15  -2    1.30    0.89 
   6 -15   2    0.42    1.00 
   6 -15   2   -0.39    0.82 
   6 -15   2    0.50    0.98 
   8  14  -2    1.04    1.12 
   8  14  -2    0.74    1.03 
  -8 -14   2    0.46    0.93 
  -8 -14   2    0.28    1.03 
   7  14  -2    4.77    1.50 
   7  14  -2    2.05    1.25 
  -7 -14   2    7.92    2.11 
  -7 -14   2    2.78    1.38 
   6  14  -2    3.20    1.21 
   6  14  -2    5.42    1.62 
  -6 -14   2    3.84    1.54 
  -6 -14   2    4.82    1.63 
   5  14  -2    0.44    0.58 
   5  14  -2    0.62    0.74 
  -5 -14   2    0.73    0.90 
  -5 -14   2   -0.43    0.64 
   4  14  -2    3.28    1.11 
   4  14  -2    0.82    0.88 
  -4 -14   2    3.03    1.27 
  -4 -14   2    1.73    1.02 
   3  14  -2    1.69    0.89 
   3  14  -2    0.86    0.75 
   3  14  -2    1.40    0.83 
  -3 -14   2    0.76    0.81 
  -3 -14   2    0.95    0.86 
   2  14  -2   17.90    2.47 
   2  14  -2   20.77    2.35 
   2  14  -2   21.51    2.51 
  -2 -14   2   18.58    2.65 
  -2 -14   2   20.67    2.35 
  -2 -14   2   20.09    2.81 
   1  14  -2   15.80    1.94 
   1  14  -2   14.28    2.24 
   1  14  -2   20.13    2.36 
  -1 -14   2   14.25    2.01 
  -1 -14   2   12.64    2.14 
  -1 -14   2   16.48    2.48 
   0  14  -2    0.79    0.58 
   0  14  -2    0.55    0.67 
   0  14  -2    0.46    0.55 
   0  14  -2    0.74    0.61 
   0  14  -2    0.04    0.54 
   0 -14   2    1.02    0.74 
   0 -14   2    0.43    0.68 
   0 -14   2    1.76    0.84 
   0 -14   2    0.51    0.59 
  -1  14  -2   13.88    1.84 
  -1  14  -2   17.10    2.30 
  -1  14  -2   14.56    2.11 
  -1  14  -2   13.44    1.68 
  -1  14  -2   14.32    1.75 
   1 -14   2   18.03    2.27 
   1 -14   2   17.18    2.30 
   1 -14   2   16.44    2.37 
   1 -14   2   12.99    2.11 
   1 -14   2   15.87    2.00 
  -2  14  -2    2.90    1.04 
  -2  14  -2    5.39    1.37 
  -2  14  -2    3.65    1.02 
  -2  14  -2    3.11    1.10 
  -2  14  -2    2.57    0.87 
   2 -14   2    2.93    1.17 
   2 -14   2    2.24    0.98 
   2 -14   2    3.47    1.22 
   2 -14   2    3.92    1.24 
  -3  14  -2   13.70    2.06 
  -3  14  -2    8.25    1.69 
  -3  14  -2   10.61    1.80 
   3 -14   2   10.55    1.83 
   3 -14   2    9.32    1.82 
   3 -14   2   15.35    2.28 
  -4  14  -2    7.21    1.52 
  -4  14  -2    5.45    1.33 
  -4  14  -2    5.58    1.44 
   4 -14   2    6.31    1.75 
   4 -14   2    9.29    1.82 
   4 -14   2    8.96    1.90 
  -5  14  -2    3.11    1.23 
  -5  14  -2    3.37    1.20 
   5 -14   2    1.52    1.17 
   5 -14   2    1.87    0.99 
   5 -14   2    2.46    1.16 
  -6  14  -2    4.20    1.49 
  -6  14  -2    6.28    1.60 
   6 -14   2    8.28    1.98 
   6 -14   2    7.09    1.88 
   6 -14   2   11.76    2.15 
  -7  14  -2    1.37    1.09 
  -7  14  -2    0.01    0.84 
   7 -14   2   -0.21    0.88 
   7 -14   2    0.72    1.20 
   7 -14   2   -0.51    0.62 
   8  13  -2    5.25    1.61 
   8  13  -2    5.89    1.65 
  -8 -13   2    9.13    2.20 
  -8 -13   2   11.74    2.42 
   7  13  -2    1.82    0.97 
   7  13  -2    1.74    1.07 
  -7 -13   2    2.26    1.26 
  -7 -13   2    1.37    0.96 
   6  13  -2    3.28    1.22 
   6  13  -2    3.70    1.23 
  -6 -13   2    3.55    1.38 
  -6 -13   2    4.59    1.56 
   5  13  -2   10.80    1.95 
   5  13  -2   14.64    2.14 
  -5 -13   2   15.18    2.35 
  -5 -13   2   19.47    2.91 
   4  13  -2    0.87    0.80 
   4  13  -2    0.58    0.60 
  -4 -13   2    0.98    0.74 
  -4 -13   2    1.07    0.88 
  -4 -13   2   -0.34    0.58 
   3  13  -2    6.02    1.42 
   3  13  -2    7.40    1.43 
  -3 -13   2    9.18    1.83 
  -3 -13   2    6.96    1.32 
  -3 -13   2    5.45    1.41 
  -3 -13   2    7.05    1.59 
   2  13  -2   10.08    1.71 
   2  13  -2    7.58    1.39 
   2  13  -2    8.91    1.65 
  -2 -13   2    7.16    1.56 
  -2 -13   2   15.06    2.25 
  -2 -13   2    8.03    1.72 
  -2 -13   2    9.60    1.57 
   1  13  -2   -0.22    0.46 
   1  13  -2    0.53    0.53 
   1  13  -2   -0.60    0.35 
   1  13  -2   -0.33    0.38 
   1  13  -2    0.21    0.44 
  -1 -13   2   -0.22    0.48 
  -1 -13   2   -0.28    0.41 
  -1 -13   2   -0.07    0.43 
  -1 -13   2   -0.22    0.43 
  -1 -13   2   -0.53    0.41 
   0  13  -2    3.25    0.82 
   0  13  -2    2.22    0.90 
   0  13  -2    4.46    1.22 
   0  13  -2    4.37    1.09 
   0  13  -2    5.77    1.11 
   0 -13   2    6.34    1.39 
   0 -13   2    5.00    1.08 
   0 -13   2    5.14    1.40 
   0 -13   2    5.45    1.43 
   0 -13   2    5.95    1.16 
  -1  13  -2    2.04    0.71 
  -1  13  -2    0.66    0.72 
  -1  13  -2    1.22    0.59 
  -1  13  -2    1.46    0.80 
  -1  13  -2    1.18    0.73 
   1 -13   2    2.86    0.85 
   1 -13   2    1.77    0.94 
   1 -13   2    2.68    0.88 
   1 -13   2    1.25    0.80 
   1 -13   2    3.24    1.08 
   1 -13   2    1.68    0.89 
  -2  13  -2   47.29    2.85 
  -2  13  -2   52.78    2.78 
  -2  13  -2   48.53    3.17 
  -2  13  -2   44.18    3.10 
  -2  13  -2   41.57    3.05 
   2 -13   2   47.59    3.05 
   2 -13   2   43.40    3.28 
   2 -13   2   46.31    3.32 
   2 -13   2   47.53    3.28 
   2 -13   2   44.43    2.85 
  -3  13  -2   23.97    2.65 
  -3  13  -2   23.33    2.73 
  -3  13  -2   26.99    2.84 
   3 -13   2   23.09    2.80 
   3 -13   2   21.82    2.68 
   3 -13   2   22.28    2.78 
   3 -13   2   26.67    2.73 
  -4  13  -2    5.11    1.32 
  -4  13  -2    5.53    1.36 
  -4  13  -2    3.71    1.19 
   4 -13   2    6.04    1.51 
   4 -13   2    5.58    1.35 
   4 -13   2    4.72    1.35 
  -5  13  -2    6.31    1.35 
  -5  13  -2    3.90    1.28 
  -5  13  -2    4.56    1.37 
   5 -13   2    6.82    1.67 
   5 -13   2    2.15    1.14 
   5 -13   2    5.79    1.46 
  -6  13  -2    0.79    0.77 
  -6  13  -2   -0.02    0.51 
   6 -13   2   -0.07    0.52 
   6 -13   2   -0.54    0.75 
   6 -13   2    0.30    0.66 
  -7  13  -2    6.89    1.71 
  -7  13  -2    3.51    1.32 
   7 -13   2    2.85    1.45 
   7 -13   2    5.63    1.74 
   7 -13   2    7.62    1.85 
  -8  13  -2    0.45    0.86 
  -8  13  -2   -0.76    0.72 
   8 -13   2   -0.18    0.96 
   8 -13   2    0.78    0.85 
   9  12  -2   -0.75    0.45 
   9  12  -2    1.39    1.02 
  -9 -12   2   -0.09    0.92 
  -9 -12   2    2.19    1.26 
   8  12  -2    1.16    0.97 
   8  12  -2    0.01    0.75 
  -8 -12   2    1.10    1.16 
  -8 -12   2    0.74    0.98 
   7  12  -2    7.50    1.58 
   7  12  -2    6.24    1.60 
  -7 -12   2   10.53    2.13 
  -7 -12   2    8.84    2.05 
   6  12  -2    7.87    1.58 
   6  12  -2    5.94    1.46 
  -6 -12   2    3.70    1.34 
  -6 -12   2    5.20    1.54 
   5  12  -2   -0.23    0.38 
   5  12  -2    0.18    0.60 
  -5 -12   2    0.96    0.75 
  -5 -12   2   -0.44    0.35 
  -5 -12   2    0.23    0.69 
   4  12  -2   17.50    2.26 
   4  12  -2   17.05    2.12 
  -4 -12   2   19.56    2.61 
  -4 -12   2   17.60    2.42 
  -4 -12   2   21.31    2.10 
  -4 -12   2   16.22    2.46 
   3  12  -2    9.06    1.48 
   3  12  -2    5.13    1.27 
   3  12  -2    6.44    1.03 
  -3 -12   2   10.77    1.79 
  -3 -12   2    4.37    1.05 
  -3 -12   2    8.66    1.68 
  -3 -12   2    6.45    1.53 
   2  12  -2    4.54    1.20 
   2  12  -2    4.25    0.87 
   2  12  -2    5.71    1.27 
   2  12  -2    6.85    1.20 
  -2 -12   2    3.90    0.97 
  -2 -12   2    4.64    1.21 
  -2 -12   2    4.56    1.37 
  -2 -12   2    6.68    1.48 
   1  12  -2    6.46    1.02 
   1  12  -2    7.09    1.08 
   1  12  -2    6.35    1.35 
   1  12  -2    4.51    1.10 
   1  12  -2    4.57    1.04 
  -1 -12   2    4.89    1.14 
  -1 -12   2    8.23    1.50 
  -1 -12   2    5.96    1.39 
  -1 -12   2    4.49    1.22 
  -1 -12   2    5.64    1.05 
   0  12  -2    0.13    0.36 
   0  12  -2   -0.16    0.35 
   0  12  -2    0.08    0.44 
   0  12  -2    0.34    0.54 
   0 -12   2    0.63    0.51 
   0 -12   2   -0.20    0.41 
   0 -12   2    0.95    0.71 
   0 -12   2   -0.17    0.42 
   0 -12   2   -0.45    0.44 
   0 -12   2   -0.03    0.46 
  -1  12  -2    1.30    0.57 
  -1  12  -2    2.05    0.75 
  -1  12  -2    1.95    0.87 
  -1  12  -2    0.19    0.41 
  -1  12  -2    1.91    0.69 
   1 -12   2    0.95    0.65 
   1 -12   2    1.16    0.75 
   1 -12   2    2.59    0.79 
   1 -12   2    2.11    0.73 
   1 -12   2    2.01    0.83 
   1 -12   2    1.91    0.81 
  -2  12  -2    0.67    0.64 
  -2  12  -2    1.26    0.59 
  -2  12  -2    0.73    0.52 
  -2  12  -2    2.41    0.90 
  -2  12  -2    0.89    0.58 
   2 -12   2    2.19    0.75 
   2 -12   2    1.35    0.82 
   2 -12   2    1.23    0.71 
   2 -12   2    1.28    0.73 
   2 -12   2    0.99    0.76 
  -3  12  -2   70.07    4.11 
  -3  12  -2   67.56    3.92 
  -3  12  -2   68.34    3.43 
  -3  12  -2   70.05    4.02 
   3 -12   2   76.01    4.33 
   3 -12   2   73.19    4.01 
   3 -12   2   69.58    4.22 
   3 -12   2   64.21    4.11 
  -4  12  -2   37.81    3.50 
  -4  12  -2   43.09    2.91 
  -4  12  -2   42.49    3.04 
   4 -12   2   47.53    3.36 
   4 -12   2   38.69    2.88 
   4 -12   2   30.20    3.31 
  -5  12  -2   -0.30    0.47 
  -5  12  -2   -0.14    0.56 
  -5  12  -2    0.74    0.79 
   5 -12   2   -0.02    0.70 
   5 -12   2   -0.18    0.70 
   5 -12   2   -0.32    0.68 
  -6  12  -2    1.64    1.00 
  -6  12  -2    3.99    1.28 
   6 -12   2    6.42    1.65 
   6 -12   2    3.04    1.19 
   6 -12   2    6.62    1.72 
  -7  12  -2    1.65    0.95 
  -7  12  -2    1.55    0.98 
   7 -12   2    0.53    0.79 
   7 -12   2    2.13    1.00 
   7 -12   2    2.76    1.39 
  -8  12  -2    6.21    1.71 
  -8  12  -2    7.71    1.77 
   8 -12   2    6.42    1.92 
   8 -12   2    7.31    1.83 
  -9  12  -2    4.13    1.51 
   9 -12   2    8.46    2.05 
   9  11  -2    0.03    0.59 
   9  11  -2   -0.38    0.74 
  -9 -11   2   -0.66    0.72 
  -9 -11   2    0.23    0.93 
   8  11  -2    2.09    1.19 
   8  11  -2    4.33    1.39 
  -8 -11   2    2.41    1.17 
  -8 -11   2    2.57    1.21 
   7  11  -2    1.87    0.92 
   7  11  -2    1.78    0.93 
  -7 -11   2    2.13    1.16 
  -7 -11   2    3.14    1.21 
   6  11  -2    4.14    1.22 
   6  11  -2    3.31    1.10 
  -6 -11   2    3.00    1.10 
  -6 -11   2    3.39    1.21 
   5  11  -2    2.58    0.93 
   5  11  -2    1.27    0.65 
   5  11  -2    2.60    1.02 
  -5 -11   2    1.50    0.81 
  -5 -11   2    3.29    1.13 
  -5 -11   2    3.71    1.21 
   4  11  -2    1.93    0.80 
   4  11  -2    2.32    0.71 
   4  11  -2    1.63    0.80 
  -4 -11   2    1.42    0.84 
  -4 -11   2    1.94    0.72 
  -4 -11   2    0.94    0.78 
  -4 -11   2    0.15    0.62 
   3  11  -2   25.09    2.55 
   3  11  -2   26.15    1.74 
   3  11  -2   26.39    2.46 
  -3 -11   2   22.81    2.15 
  -3 -11   2   21.40    2.59 
  -3 -11   2   24.01    2.84 
  -3 -11   2   22.78    2.58 
   2  11  -2   31.47    1.91 
   2  11  -2   33.46    1.83 
   2  11  -2   27.36    2.08 
  -2 -11   2   31.54    3.05 
  -2 -11   2   28.92    2.10 
  -2 -11   2   29.43    1.84 
  -2 -11   2   32.92    3.03 
  -2 -11   2   28.15    2.96 
   1  11  -2   13.83    1.85 
   1  11  -2   17.02    1.60 
   1  11  -2   17.40    1.80 
   1  11  -2   15.86    1.86 
  -1 -11   2   12.60    1.64 
  -1 -11   2   13.26    1.80 
  -1 -11   2   14.95    2.02 
  -1 -11   2   14.54    1.54 
  -1 -11   2   15.21    2.11 
   0  11  -2    1.99    0.63 
   0  11  -2    3.05    0.83 
   0  11  -2    3.44    0.78 
   0  11  -2    2.93    0.86 
   0 -11   2    1.67    0.64 
   0 -11   2    2.59    0.81 
   0 -11   2    3.87    0.90 
   0 -11   2    2.97    0.99 
   0 -11   2    4.02    0.97 
   0 -11   2    2.98    0.90 
  -1  11  -2   12.28    1.37 
  -1  11  -2   11.64    1.50 
  -1  11  -2   11.85    1.67 
  -1  11  -2   13.69    1.83 
   1 -11   2   15.47    1.64 
   1 -11   2   13.60    1.75 
   1 -11   2   12.14    1.82 
   1 -11   2   17.05    2.11 
   1 -11   2   12.99    1.60 
   1 -11   2   12.10    1.75 
  -2  11  -2   55.77    2.94 
  -2  11  -2   56.71    3.36 
  -2  11  -2   55.14    2.77 
  -2  11  -2   51.01    3.20 
   2 -11   2   50.92    3.30 
   2 -11   2   61.87    3.59 
   2 -11   2   54.20    3.12 
   2 -11   2   55.38    3.35 
   2 -11   2   52.85    2.85 
  -3  11  -2   51.44    2.66 
  -3  11  -2   48.50    3.22 
  -3  11  -2   44.83    3.00 
  -3  11  -2   47.64    3.05 
  -3  11  -2   50.91    2.57 
   3 -11   2   49.05    3.33 
   3 -11   2   49.67    2.67 
   3 -11   2   50.14    3.28 
   3 -11   2   54.26    3.17 
   3 -11   2   53.39    3.40 
  -4  11  -2    3.83    1.10 
  -4  11  -2    2.94    1.04 
  -4  11  -2    2.48    0.85 
   4 -11   2    4.07    1.26 
   4 -11   2    3.27    1.14 
   4 -11   2    4.82    1.22 
  -5  11  -2   43.18    3.13 
  -5  11  -2   39.30    2.92 
  -5  11  -2   39.14    2.78 
   5 -11   2   39.95    3.77 
   5 -11   2   36.42    3.59 
   5 -11   2   39.18    3.57 
  -6  11  -2    0.14    0.68 
  -6  11  -2    3.38    0.98 
  -6  11  -2    0.23    0.52 
   6 -11   2    1.82    0.91 
   6 -11   2    0.44    0.68 
   6 -11   2    2.10    1.00 
  -7  11  -2    4.46    1.37 
  -7  11  -2    4.63    1.35 
   7 -11   2    3.47    1.35 
   7 -11   2    5.31    1.51 
   7 -11   2    3.92    1.47 
  -8  11  -2    2.01    1.05 
  -8  11  -2    2.45    1.17 
   8 -11   2    3.00    1.41 
   8 -11   2    5.22    1.50 
  -9  11  -2    2.88    1.34 
  -9  11  -2    2.59    1.40 
   9 -11   2    2.86    1.50 
   9 -11   2    3.44    1.44 
  10  10  -2    0.14    0.91 
  10  10  -2   -0.24    0.81 
 -10 -10   2    0.25    0.76 
 -10 -10   2    1.64    1.19 
   9  10  -2    1.18    0.87 
   9  10  -2    1.07    0.93 
  -9 -10   2    5.34    1.63 
  -9 -10   2    1.92    1.15 
   8  10  -2   -0.54    0.58 
   8  10  -2   -0.13    0.60 
  -8 -10   2   -0.35    0.73 
  -8 -10   2    1.05    0.85 
   7  10  -2    4.57    1.11 
   7  10  -2    2.33    1.00 
   7  10  -2    2.57    1.02 
  -7 -10   2    2.37    1.13 
  -7 -10   2    2.89    1.20 
   6  10  -2    4.57    1.21 
   6  10  -2    3.19    1.07 
   6  10  -2    7.47    1.21 
  -6 -10   2    3.92    1.27 
  -6 -10   2    4.61    1.35 
   5  10  -2    2.73    0.77 
   5  10  -2    1.54    0.74 
   5  10  -2    1.95    0.82 
  -5 -10   2    1.34    0.82 
  -5 -10   2    1.71    0.77 
  -5 -10   2    2.68    1.00 
  -5 -10   2    3.90    0.86 
   4  10  -2   21.57    2.38 
   4  10  -2   26.47    2.49 
   4  10  -2   24.41    1.68 
  -4 -10   2   23.68    1.80 
  -4 -10   2   23.51    2.59 
  -4 -10   2   26.06    2.74 
  -4 -10   2   22.33    2.63 
   3  10  -2   21.99    2.14 
   3  10  -2   21.93    1.51 
   3  10  -2   17.22    2.01 
  -3 -10   2   20.55    1.92 
  -3 -10   2   18.80    2.36 
  -3 -10   2   17.91    2.15 
  -3 -10   2   21.21    2.39 
   2  10  -2    0.71    0.43 
   2  10  -2    0.20    0.51 
   2  10  -2    0.67    0.33 
   2  10  -2    0.96    0.53 
  -2 -10   2    1.01    0.66 
  -2 -10   2    0.80    0.40 
  -2 -10   2    1.03    0.71 
  -2 -10   2    0.52    0.45 
  -2 -10   2    2.32    0.84 
   1  10  -2   54.45    3.07 
   1  10  -2   60.65    2.96 
   1  10  -2   54.88    2.64 
   1  10  -2   49.05    3.11 
  -1 -10   2   56.74    3.23 
  -1 -10   2   57.44    3.42 
  -1 -10   2   51.11    2.94 
  -1 -10   2   52.46    3.24 
  -1 -10   2   54.15    2.74 
   0  10  -2    4.12    0.78 
   0  10  -2    4.51    1.01 
   0  10  -2    4.17    0.90 
   0  10  -2    4.69    0.81 
   0 -10   2    5.67    1.18 
   0 -10   2    4.79    1.05 
   0 -10   2    6.76    1.06 
   0 -10   2    3.27    0.79 
   0 -10   2    5.73    1.19 
   0 -10   2    4.71    1.05 
  -1  10  -2   13.35    1.49 
  -1  10  -2   11.65    1.63 
  -1  10  -2   14.92    1.42 
  -1  10  -2   10.98    1.51 
   1 -10   2   12.59    1.60 
   1 -10   2   11.89    1.61 
   1 -10   2   13.52    1.45 
   1 -10   2   10.88    1.67 
   1 -10   2   13.90    1.76 
   1 -10   2   12.03    1.45 
  -2  10  -2    5.79    1.11 
  -2  10  -2    6.15    0.90 
  -2  10  -2    6.29    0.97 
   2 -10   2    5.40    1.21 
   2 -10   2    6.20    0.94 
   2 -10   2    3.63    0.96 
   2 -10   2    4.05    1.04 
   2 -10   2    5.11    1.03 
  -3  10  -2   82.41    4.61 
  -3  10  -2  104.83    4.17 
  -3  10  -2   93.02    4.66 
  -3  10  -2  102.18    4.71 
   3 -10   2   96.55    4.89 
   3 -10   2  105.52    4.24 
   3 -10   2  100.20    4.95 
   3 -10   2   92.29    4.58 
   3 -10   2   92.95    4.87 
  -4  10  -2  126.98    5.95 
  -4  10  -2  130.50    5.79 
  -4  10  -2  123.43    5.98 
   4 -10   2  129.35    5.94 
   4 -10   2  133.94    5.28 
   4 -10   2  127.63    6.21 
   4 -10   2  129.25    6.21 
  -5  10  -2    7.71    1.55 
  -5  10  -2   10.22    1.59 
  -5  10  -2   10.15    1.71 
   5 -10   2   11.18    1.88 
   5 -10   2   11.96    1.95 
   5 -10   2   13.32    1.95 
  -6  10  -2    3.15    1.09 
  -6  10  -2    3.42    1.10 
  -6  10  -2    1.88    0.76 
   6 -10   2    2.83    1.04 
   6 -10   2    3.32    1.20 
   6 -10   2    2.89    1.13 
  -7  10  -2    0.32    0.76 
  -7  10  -2    0.66    0.61 
   7 -10   2    2.76    1.16 
   7 -10   2    0.89    0.79 
   7 -10   2    1.90    1.02 
  -8  10  -2    0.50    0.77 
  -8  10  -2    3.43    1.24 
   8 -10   2    1.86    1.13 
   8 -10   2    7.76    1.80 
  -9  10  -2    2.47    1.11 
  -9  10  -2    6.21    1.73 
   9 -10   2    5.41    1.75 
   9 -10   2    4.64    1.45 
 -10  10  -2    1.80    1.25 
 -10  10  -2    0.36    0.99 
  10 -10   2    1.91    1.07 
  10 -10   2    0.70    1.17 
  10   9  -2    6.04    1.57 
  10   9  -2    4.09    1.55 
 -10  -9   2    9.35    2.04 
 -10  -9   2    4.10    1.60 
   9   9  -2    0.09    0.59 
   9   9  -2    0.07    0.67 
   9   9  -2    0.85    0.70 
  -9  -9   2    0.37    0.90 
  -9  -9   2    0.07    0.86 
   8   9  -2    6.36    1.46 
   8   9  -2    6.73    1.40 
   8   9  -2    6.31    1.46 
  -8  -9   2    5.40    1.55 
  -8  -9   2    4.63    1.44 
   7   9  -2   18.03    2.35 
   7   9  -2   20.90    2.11 
   7   9  -2   19.33    2.41 
  -7  -9   2   15.05    2.38 
  -7  -9   2   14.25    2.27 
   6   9  -2    3.23    0.86 
   6   9  -2    3.04    0.97 
   6   9  -2    3.45    1.04 
  -6  -9   2    3.25    1.19 
  -6  -9   2    2.60    0.90 
  -6  -9   2    2.72    1.06 
   5   9  -2   13.51    1.82 
   5   9  -2   13.02    1.50 
   5   9  -2   12.07    1.71 
  -5  -9   2   14.26    2.01 
  -5  -9   2   14.28    1.55 
  -5  -9   2   10.22    1.79 
  -5  -9   2   10.66    1.71 
   4   9  -2   -0.18    0.25 
   4   9  -2    0.14    0.39 
   4   9  -2   -0.22    0.41 
  -4  -9   2   -0.41    0.24 
  -4  -9   2   -0.26    0.34 
  -4  -9   2   -0.09    0.45 
  -4  -9   2    0.29    0.47 
   3   9  -2   20.52    2.15 
   3   9  -2   21.32    2.03 
   3   9  -2   21.95    1.10 
   3   9  -2   21.80    1.45 
  -3  -9   2   19.38    2.29 
  -3  -9   2   21.32    2.31 
  -3  -9   2   22.33    2.30 
  -3  -9   2   25.60    1.72 
   2   9  -2   80.55    3.80 
   2   9  -2   87.11    3.30 
   2   9  -2   80.58    3.43 
   2   9  -2   77.48    3.95 
  -2  -9   2   76.32    4.05 
  -2  -9   2   82.29    3.34 
  -2  -9   2   77.92    4.13 
  -2  -9   2   77.71    4.23 
  -2  -9   2   80.75    3.78 
   1   9  -2    4.98    0.77 
   1   9  -2    5.71    1.09 
   1   9  -2    3.98    0.78 
   1   9  -2    5.08    0.99 
  -1  -9   2    5.13    0.84 
  -1  -9   2    5.74    1.16 
  -1  -9   2    3.96    0.95 
  -1  -9   2    4.21    0.86 
  -1  -9   2    4.64    1.04 
   0   9  -2   26.11    1.64 
   0   9  -2   29.37    1.66 
   0   9  -2   21.52    1.66 
   0   9  -2   24.69    1.91 
   0  -9   2   27.42    2.05 
   0  -9   2   26.23    1.90 
   0  -9   2   24.65    1.71 
   0  -9   2   28.46    1.77 
   0  -9   2   24.44    2.36 
   0  -9   2   24.62    1.82 
   0  -9   2   25.96    1.67 
  -1   9  -2    7.99    1.06 
  -1   9  -2    6.58    0.89 
  -1   9  -2    5.67    1.06 
  -1   9  -2    6.27    1.14 
   1  -9   2    7.97    1.13 
   1  -9   2    4.72    1.04 
   1  -9   2    7.17    1.28 
   1  -9   2    7.01    1.13 
   1  -9   2    5.82    1.11 
   1  -9   2    7.14    0.98 
  -2   9  -2   29.71    2.13 
  -2   9  -2   29.45    2.08 
  -2   9  -2   28.37    1.65 
  -2   9  -2   31.38    1.84 
   2  -9   2   26.80    2.47 
   2  -9   2   28.81    1.74 
   2  -9   2   29.78    2.23 
   2  -9   2   31.46    2.01 
   2  -9   2   30.96    2.22 
  -3   9  -2    6.29    0.85 
  -3   9  -2    6.27    1.22 
  -3   9  -2    5.75    1.10 
  -3   9  -2    7.94    1.23 
   3  -9   2    6.86    1.26 
   3  -9   2    7.30    1.24 
   3  -9   2    5.35    0.83 
   3  -9   2    5.90    1.19 
  -4   9  -2   10.49    1.42 
  -4   9  -2    8.89    1.50 
  -4   9  -2    8.72    1.53 
  -4   9  -2   10.79    1.00 
   4  -9   2   10.56    1.17 
   4  -9   2   10.46    1.68 
   4  -9   2    9.52    1.51 
   4  -9   2    9.50    1.58 
  -5   9  -2   39.85    2.66 
  -5   9  -2   39.82    2.89 
  -5   9  -2   39.85    2.80 
   5  -9   2   45.56    2.40 
   5  -9   2   38.91    2.92 
   5  -9   2   45.92    2.98 
   5  -9   2   45.98    3.15 
  -6   9  -2    5.10    1.15 
  -6   9  -2    8.24    1.57 
  -6   9  -2    5.59    1.30 
   6  -9   2    8.71    1.61 
   6  -9   2    6.98    1.55 
   6  -9   2    7.00    1.58 
  -7   9  -2   11.59    1.98 
  -7   9  -2   13.58    1.85 
  -7   9  -2   10.33    1.88 
   7  -9   2   13.43    2.25 
   7  -9   2   14.38    2.16 
   7  -9   2   12.28    2.16 
  -8   9  -2   11.21    2.09 
  -8   9  -2    9.78    1.88 
   8  -9   2    9.84    2.01 
  -9   9  -2   -0.04    0.78 
  -9   9  -2   -0.84    0.60 
   9  -9   2   -0.93    0.60 
   9  -9   2   -0.35    0.62 
 -10   9  -2    2.59    1.22 
 -10   9  -2    0.65    0.79 
  10  -9   2    4.08    1.37 
  10  -9   2    1.04    1.04 
  10   8  -2   -0.02    0.70 
  10   8  -2    0.23    0.88 
  10   8  -2   -0.08    0.73 
 -10  -8   2    0.81    0.79 
 -10  -8   2    0.65    1.10 
   9   8  -2   16.13    2.50 
   9   8  -2   12.23    1.88 
   9   8  -2   12.92    2.05 
  -9  -8   2   19.00    2.79 
  -9  -8   2   16.44    2.66 
   8   8  -2    8.62    1.52 
   8   8  -2    8.59    1.72 
   8   8  -2    6.57    1.45 
  -8  -8   2    8.58    1.85 
  -8  -8   2    6.92    1.69 
   7   8  -2    2.57    0.80 
   7   8  -2    1.89    0.89 
   7   8  -2    1.48    0.75 
  -7  -8   2    1.58    0.94 
  -7  -8   2    0.10    0.69 
   6   8  -2    3.13    0.96 
   6   8  -2    2.56    0.80 
   6   8  -2    1.39    0.70 
  -6  -8   2    0.38    0.53 
  -6  -8   2    1.40    0.56 
  -6  -8   2    3.02    1.04 
   5   8  -2    0.75    0.50 
   5   8  -2    0.52    0.48 
   5   8  -2    0.87    0.52 
  -5  -8   2    0.32    0.54 
  -5  -8   2    0.65    0.42 
  -5  -8   2    0.22    0.40 
  -5  -8   2    0.62    0.51 
   4   8  -2   18.54    2.03 
   4   8  -2   21.67    2.09 
   4   8  -2   25.25    1.60 
  -4  -8   2   21.10    2.38 
  -4  -8   2   25.61    2.47 
  -4  -8   2   23.58    2.43 
  -4  -8   2   21.26    1.58 
   3   8  -2    1.73    0.50 
   3   8  -2    1.75    0.29 
   3   8  -2    1.26    0.59 
   3   8  -2    1.85    0.29 
   3   8  -2    0.77    0.57 
  -3  -8   2    1.79    0.57 
  -3  -8   2    1.44    0.66 
  -3  -8   2    1.95    0.73 
  -3  -8   2    1.13    0.63 
   2   8  -2   64.83    3.15 
   2   8  -2   63.13    2.79 
   2   8  -2   64.12    3.30 
  -2  -8   2   62.40    3.38 
  -2  -8   2   62.35    3.42 
  -2  -8   2   69.13    3.64 
  -2  -8   2   62.93    3.12 
  -2  -8   2   67.77    2.71 
   1   8  -2  145.58    5.63 
   1   8  -2  150.39    5.38 
   1   8  -2  141.80    6.00 
   1   8  -2  133.23    5.77 
  -1  -8   2  140.28    5.74 
  -1  -8   2  150.28    6.20 
  -1  -8   2  146.61    6.14 
  -1  -8   2  145.71    6.00 
  -1  -8   2  138.79    5.42 
   0   8  -2    2.32    0.63 
   0   8  -2    1.91    0.50 
   0   8  -2    1.49    0.46 
   0   8  -2    2.39    0.69 
   0  -8   2    1.21    0.47 
   0  -8   2    2.09    0.66 
   0  -8   2    1.84    0.52 
   0  -8   2    1.41    0.63 
   0  -8   2    1.09    0.53 
   0  -8   2    1.68    0.67 
   0  -8   2    2.29    0.58 
  -1   8  -2   14.61    1.66 
  -1   8  -2   13.42    1.02 
  -1   8  -2   14.19    1.39 
  -1   8  -2   15.79    1.63 
   1  -8   2   15.89    1.62 
   1  -8   2   16.08    1.68 
   1  -8   2   14.56    1.43 
   1  -8   2   13.96    1.28 
   1  -8   2   13.31    1.62 
   1  -8   2   15.18    1.67 
  -2   8  -2    7.89    0.93 
  -2   8  -2    7.22    0.82 
  -2   8  -2    3.99    0.90 
  -2   8  -2    6.46    1.07 
   2  -8   2    7.36    1.08 
   2  -8   2    7.13    1.18 
   2  -8   2    7.13    0.88 
   2  -8   2    6.48    1.16 
   2  -8   2    7.53    1.20 
  -3   8  -2   15.33    1.83 
  -3   8  -2   19.58    2.04 
  -3   8  -2   22.08    1.64 
  -3   8  -2   20.43    1.23 
   3  -8   2   19.50    1.91 
   3  -8   2   19.31    1.29 
   3  -8   2   24.75    2.30 
   3  -8   2   16.11    1.90 
  -4   8  -2   39.57    2.40 
  -4   8  -2   33.40    2.37 
  -4   8  -2   34.96    2.46 
  -4   8  -2   38.09    1.74 
   4  -8   2   36.45    2.62 
   4  -8   2   40.85    2.07 
   4  -8   2   36.03    2.57 
   4  -8   2   41.79    2.57 
  -5   8  -2    2.39    0.80 
  -5   8  -2    3.36    1.01 
  -5   8  -2    3.42    0.99 
   5  -8   2    3.93    0.76 
   5  -8   2    2.77    0.91 
   5  -8   2    3.28    0.96 
   5  -8   2    3.29    1.06 
  -6   8  -2    7.86    1.35 
  -6   8  -2    7.94    1.49 
  -6   8  -2   10.49    1.75 
   6  -8   2    7.28    1.42 
   6  -8   2    7.54    1.48 
   6  -8   2    9.89    1.75 
  -7   8  -2    1.92    0.83 
  -7   8  -2    3.56    1.20 
  -7   8  -2    1.39    0.89 
   7  -8   2    0.90    0.85 
   7  -8   2    1.23    0.86 
   7  -8   2    3.06    1.11 
  -8   8  -2    9.50    1.83 
  -8   8  -2    8.69    1.77 
   8  -8   2   12.00    2.05 
   8  -8   2    8.23    1.86 
  -9   8  -2   12.70    2.20 
  -9   8  -2   16.81    2.64 
   9  -8   2   10.58    2.14 
   9  -8   2   21.59    2.96 
 -10   8  -2    3.48    1.40 
 -10   8  -2    4.32    1.39 
  10  -8   2    2.86    1.22 
  10  -8   2    2.12    1.26 
  11   7  -2   -0.22    0.73 
  11   7  -2    0.55    0.72 
 -11  -7   2    0.64    1.05 
 -11  -7   2   -0.69    0.61 
  10   7  -2    2.21    1.02 
  10   7  -2    3.49    1.24 
  10   7  -2    1.86    1.11 
 -10  -7   2    4.15    1.34 
 -10  -7   2    2.90    1.38 
   9   7  -2   -0.07    0.66 
   9   7  -2    1.22    0.85 
   9   7  -2    1.30    0.82 
  -9  -7   2    2.20    1.14 
  -9  -7   2    1.34    0.83 
   8   7  -2    4.74    1.25 
   8   7  -2    5.65    1.23 
   8   7  -2    3.85    1.12 
  -8  -7   2    3.64    1.15 
  -8  -7   2    2.87    1.09 
   7   7  -2    6.24    1.37 
   7   7  -2    8.90    1.43 
   7   7  -2    7.72    1.47 
  -7  -7   2    7.02    1.53 
  -7  -7   2    7.36    1.11 
  -7  -7   2    6.91    1.55 
   6   7  -2    1.79    0.73 
   6   7  -2    4.35    1.04 
   6   7  -2    4.48    0.93 
  -6  -7   2    3.63    0.78 
  -6  -7   2    3.20    1.07 
  -6  -7   2    1.95    0.84 
   5   7  -2    4.92    0.88 
   5   7  -2    4.45    0.97 
   5   7  -2    4.46    1.00 
  -5  -7   2    3.90    0.78 
  -5  -7   2    4.60    1.13 
  -5  -7   2    4.74    1.13 
  -5  -7   2    5.42    1.19 
   4   7  -2    0.60    0.45 
   4   7  -2    1.48    0.46 
   4   7  -2    0.91    0.46 
  -4  -7   2    0.87    0.60 
  -4  -7   2    0.02    0.31 
  -4  -7   2    1.06    0.66 
  -4  -7   2    1.03    0.50 
   3   7  -2   24.18    1.75 
   3   7  -2   28.38    1.04 
   3   7  -2   29.00    1.98 
   3   7  -2   30.97    1.63 
   3   7  -2   28.93    1.05 
  -3  -7   2   25.78    1.96 
  -3  -7   2   23.95    1.95 
  -3  -7   2   27.84    2.04 
  -3  -7   2   25.36    1.67 
   2   7  -2   41.51    2.16 
   2   7  -2   35.85    2.19 
   2   7  -2   36.89    1.80 
  -2  -7   2   35.26    2.35 
  -2  -7   2   39.20    2.35 
  -2  -7   2   33.95    2.27 
  -2  -7   2   41.39    2.14 
  -2  -7   2   37.62    1.68 
   1   7  -2   46.50    2.11 
   1   7  -2   47.42    2.34 
   1   7  -2   49.84    2.56 
  -1  -7   2   50.38    2.75 
  -1  -7   2   45.44    2.43 
  -1  -7   2   49.40    2.22 
  -1  -7   2   43.25    2.54 
  -1  -7   2   51.98    2.78 
   0   7  -2  195.42    7.27 
   0   7  -2  200.07    7.03 
   0   7  -2  192.12    7.42 
   0   7  -2  201.79    6.96 
   0  -7   2  189.97    7.08 
   0  -7   2  194.49    7.17 
   0  -7   2  192.29    7.02 
   0  -7   2  195.17    7.37 
   0  -7   2  193.54    7.36 
   0  -7   2  190.90    7.54 
   0  -7   2  198.87    7.61 
  -1   7  -2   52.89    2.87 
  -1   7  -2   53.52    2.82 
  -1   7  -2   60.27    2.51 
  -1   7  -2   59.07    2.68 
   1  -7   2   62.60    2.61 
   1  -7   2   51.44    2.86 
   1  -7   2   60.84    2.90 
   1  -7   2   55.84    3.00 
   1  -7   2   60.60    2.71 
   1  -7   2   55.11    2.93 
  -2   7  -2   48.79    2.65 
  -2   7  -2   46.40    2.70 
  -2   7  -2   53.79    2.37 
   2  -7   2   53.64    2.92 
   2  -7   2   51.70    2.62 
   2  -7   2   57.31    2.39 
   2  -7   2   53.25    2.82 
   2  -7   2   49.61    2.79 
  -3   7  -2   43.05    2.39 
  -3   7  -2   41.24    2.51 
  -3   7  -2   44.69    1.96 
   3  -7   2   40.98    2.01 
   3  -7   2   44.34    2.45 
   3  -7   2   42.30    2.60 
   3  -7   2   40.08    2.54 
  -4   7  -2    1.58    0.34 
  -4   7  -2    0.94    0.56 
  -4   7  -2    1.25    0.59 
  -4   7  -2    3.09    0.77 
   4  -7   2    2.46    0.81 
   4  -7   2    3.27    0.87 
   4  -7   2    2.21    0.51 
   4  -7   2    1.06    0.57 
  -5   7  -2    4.94    0.97 
  -5   7  -2    4.62    1.08 
  -5   7  -2    5.37    1.13 
   5  -7   2    6.19    0.92 
   5  -7   2    5.92    1.15 
   5  -7   2    5.39    1.23 
   5  -7   2    4.95    1.11 
  -6   7  -2    6.83    1.42 
  -6   7  -2    8.26    1.47 
  -6   7  -2    7.84    1.31 
   6  -7   2    7.96    1.51 
   6  -7   2   10.60    1.29 
   6  -7   2    8.93    1.59 
   6  -7   2    7.92    1.51 
  -7   7  -2    6.22    1.28 
  -7   7  -2    5.77    1.33 
  -7   7  -2    3.77    1.20 
   7  -7   2    3.08    1.08 
   7  -7   2    4.16    1.13 
   7  -7   2    5.19    1.34 
  -8   7  -2   26.19    2.87 
  -8   7  -2   23.37    2.89 
  -8   7  -2   26.84    2.63 
   8  -7   2   26.29    3.00 
   8  -7   2   26.14    3.02 
  -9   7  -2    0.97    0.95 
  -9   7  -2    0.44    0.75 
   9  -7   2    0.73    0.67 
   9  -7   2    0.93    0.73 
 -10   7  -2    9.30    1.88 
 -10   7  -2    8.15    1.84 
  10  -7   2    5.99    1.71 
  10  -7   2    7.69    1.89 
 -11   7  -2    1.39    1.22 
 -11   7  -2    7.01    1.82 
  11  -7   2    4.22    1.62 
  11  -7   2    3.41    1.61 
  11   6  -2    0.13    0.74 
  11   6  -2    2.08    1.17 
 -11  -6   2    0.91    1.07 
 -11  -6   2   -0.66    0.92 
  10   6  -2    0.45    0.80 
  10   6  -2    1.10    0.90 
  10   6  -2    1.40    0.93 
 -10  -6   2    1.43    0.97 
 -10  -6   2   -0.40    0.89 
   9   6  -2    6.41    1.52 
   9   6  -2    8.12    1.59 
   9   6  -2    7.99    1.57 
  -9  -6   2    5.99    1.48 
  -9  -6   2    5.76    1.67 
   8   6  -2    9.74    1.77 
   8   6  -2    9.53    1.60 
   8   6  -2    7.12    1.36 
  -8  -6   2    4.98    1.38 
  -8  -6   2    7.38    1.60 
   7   6  -2    5.45    1.24 
   7   6  -2    9.40    1.43 
   7   6  -2    7.62    1.34 
  -7  -6   2    7.14    1.56 
  -7  -6   2    7.78    1.19 
  -7  -6   2    9.58    1.68 
   6   6  -2   22.38    2.28 
   6   6  -2   20.24    2.15 
   6   6  -2   17.65    1.81 
  -6  -6   2   22.53    2.49 
  -6  -6   2   22.43    1.60 
  -6  -6   2   21.77    2.35 
   5   6  -2    3.48    0.83 
   5   6  -2    3.92    0.79 
   5   6  -2    4.15    0.92 
  -5  -6   2    3.69    0.99 
  -5  -6   2    3.05    0.69 
  -5  -6   2    2.61    0.87 
  -5  -6   2    2.95    0.83 
   4   6  -2   22.59    1.73 
   4   6  -2   24.29    1.51 
   4   6  -2   24.85    1.81 
  -4  -6   2   21.36    2.13 
  -4  -6   2   23.68    1.52 
  -4  -6   2   23.69    2.23 
  -4  -6   2   23.16    2.25 
   3   6  -2   82.94    3.26 
   3   6  -2   80.30    3.69 
   3   6  -2   72.20    3.50 
  -3  -6   2   77.76    3.77 
  -3  -6   2   73.71    3.71 
  -3  -6   2   82.85    3.43 
  -3  -6   2   75.02    3.80 
   2   6  -2   64.76    2.92 
   2   6  -2   62.68    3.06 
   2   6  -2   65.66    2.40 
   2   6  -2   65.88    2.61 
  -2  -6   2   59.63    3.19 
  -2  -6   2   63.88    3.17 
  -2  -6   2   62.10    2.85 
  -2  -6   2   60.46    3.13 
  -2  -6   2   62.22    2.40 
   1   6  -2  158.35    5.95 
   1   6  -2  158.63    6.16 
   1   6  -2  166.66    5.70 
  -1  -6   2  164.21    6.39 
  -1  -6   2  164.78    6.12 
  -1  -6   2  165.14    6.31 
  -1  -6   2  155.33    6.36 
  -1  -6   2  159.76    5.76 
   0   6  -2   12.25    1.32 
   0   6  -2   13.83    1.05 
   0   6  -2   13.34    0.92 
   0  -6   2   12.69    1.29 
   0  -6   2   13.10    1.42 
   0  -6   2   13.61    0.93 
   0  -6   2   12.01    1.39 
   0  -6   2   13.93    1.34 
   0  -6   2   11.53    1.13 
  -1   6  -2   39.44    1.71 
  -1   6  -2   36.94    2.09 
  -1   6  -2   32.74    1.97 
  -1   6  -2   35.60    1.84 
   1  -6   2   38.73    2.14 
   1  -6   2   32.84    2.08 
   1  -6   2   35.36    1.83 
   1  -6   2   37.55    1.75 
   1  -6   2   38.14    2.06 
   1  -6   2   38.29    2.15 
  -2   6  -2  108.07    4.58 
  -2   6  -2  107.32    4.07 
  -2   6  -2  111.13    4.51 
   2  -6   2  106.47    4.36 
   2  -6   2  104.21    4.60 
   2  -6   2  107.25    4.67 
   2  -6   2  108.50    4.03 
   2  -6   2  110.26    4.63 
  -3   6  -2   35.55    2.03 
  -3   6  -2   35.81    1.58 
  -3   6  -2   29.41    2.03 
   3  -6   2   33.60    2.03 
   3  -6   2   36.05    2.23 
   3  -6   2   32.34    2.16 
   3  -6   2   36.80    1.71 
  -4   6  -2   64.10    2.32 
  -4   6  -2   59.75    3.18 
  -4   6  -2   62.38    2.30 
  -4   6  -2   64.39    3.34 
  -4   6  -2   65.94    3.15 
   4  -6   2   60.39    3.32 
   4  -6   2   64.62    3.26 
   4  -6   2   57.14    3.28 
   4  -6   2   63.90    2.77 
  -5   6  -2   19.64    1.86 
  -5   6  -2   15.09    1.75 
  -5   6  -2   17.78    1.99 
   5  -6   2   16.15    1.97 
   5  -6   2   14.95    1.75 
   5  -6   2   16.21    1.21 
   5  -6   2   16.53    1.94 
  -6   6  -2   22.43    2.41 
  -6   6  -2   26.67    1.95 
  -6   6  -2   18.71    2.12 
   6  -6   2   20.75    1.53 
   6  -6   2   21.48    2.31 
   6  -6   2   19.58    2.28 
   6  -6   2   25.20    2.58 
  -7   6  -2   28.74    2.92 
  -7   6  -2   29.06    2.20 
  -7   6  -2   29.81    2.83 
   7  -6   2   32.44    3.09 
   7  -6   2   28.90    2.90 
   7  -6   2   27.65    2.90 
   7  -6   2   27.95    1.93 
  -8   6  -2   17.21    2.06 
  -8   6  -2   16.42    2.22 
  -8   6  -2   14.14    2.15 
   8  -6   2   16.76    2.26 
   8  -6   2   14.69    2.19 
  -9   6  -2   21.32    2.76 
  -9   6  -2   23.36    2.70 
   9  -6   2   15.85    2.45 
   9  -6   2   24.06    3.00 
 -10   6  -2    3.49    1.28 
 -10   6  -2    1.26    0.94 
  10  -6   2    2.02    1.04 
  10  -6   2    2.77    1.35 
 -11   6  -2    1.60    1.09 
 -11   6  -2    0.71    1.03 
  11  -6   2    0.80    0.96 
  11  -6   2    0.60    1.05 
  11   5  -2    0.53    0.82 
  11   5  -2    0.25    0.82 
 -11  -5   2   -0.18    0.74 
 -11  -5   2   -1.27    0.86 
  10   5  -2    4.23    1.40 
  10   5  -2    3.60    1.28 
 -10  -5   2    2.95    1.25 
 -10  -5   2    2.93    1.24 
   9   5  -2    0.51    0.74 
   9   5  -2    2.13    0.77 
   9   5  -2    1.21    0.85 
  -9  -5   2    0.37    0.75 
  -9  -5   2    0.09    0.78 
   8   5  -2   26.38    2.55 
   8   5  -2   27.20    2.64 
   8   5  -2   21.68    2.55 
  -8  -5   2   33.08    3.14 
  -8  -5   2   30.70    3.19 
  -8  -5   2   26.36    1.98 
   7   5  -2   44.95    2.78 
   7   5  -2   43.38    2.99 
   7   5  -2   48.51    2.88 
  -7  -5   2   46.38    3.17 
  -7  -5   2   42.98    2.51 
  -7  -5   2   42.84    2.98 
   6   5  -2   -0.35    0.38 
   6   5  -2    0.66    0.47 
   6   5  -2    0.44    0.51 
  -6  -5   2    1.00    0.63 
  -6  -5   2   -0.02    0.33 
  -6  -5   2    0.02    0.34 
   5   5  -2   35.13    2.35 
   5   5  -2   44.41    2.27 
   5   5  -2   37.59    2.34 
  -5  -5   2   41.99    2.64 
  -5  -5   2   35.04    2.03 
  -5  -5   2   33.20    2.37 
   4   5  -2    9.20    1.04 
   4   5  -2   10.77    1.34 
   4   5  -2   10.28    1.28 
  -4  -5   2   10.75    1.42 
  -4  -5   2   11.20    1.17 
  -4  -5   2   11.24    1.42 
  -4  -5   2   10.45    1.42 
   3   5  -2    4.58    0.81 
   3   5  -2    5.20    0.87 
   3   5  -2    5.92    0.73 
  -3  -5   2    5.66    0.98 
  -3  -5   2    4.43    0.74 
  -3  -5   2    5.96    1.00 
  -3  -5   2    4.99    0.91 
   2   5  -2   88.05    3.85 
   2   5  -2   89.40    3.73 
   2   5  -2   95.09    3.16 
   2   5  -2   92.22    3.41 
  -2  -5   2   91.52    4.05 
  -2  -5   2   90.14    3.15 
  -2  -5   2   90.10    3.96 
  -2  -5   2   85.96    3.93 
  -2  -5   2   90.25    3.68 
   1   5  -2   25.54    1.44 
   1   5  -2   30.00    1.35 
   1   5  -2   28.19    1.63 
   1   5  -2   28.73    1.27 
  -1  -5   2   26.12    1.72 
  -1  -5   2   26.14    1.69 
  -1  -5   2   25.97    1.65 
  -1  -5   2   26.48    1.54 
  -1  -5   2   27.69    1.32 
   0   5  -2   76.52    3.02 
   0   5  -2   79.57    3.26 
   0   5  -2   79.62    3.38 
   0  -5   2   79.37    3.47 
   0  -5   2   79.47    3.34 
   0  -5   2   79.62    3.49 
   0  -5   2   77.13    3.01 
   0  -5   2   78.64    3.17 
  -1   5  -2   35.81    1.69 
  -1   5  -2   32.66    1.88 
  -1   5  -2   36.72    1.90 
  -1   5  -2   33.76    1.51 
   1  -5   2   32.55    1.83 
   1  -5   2   35.17    1.70 
   1  -5   2   34.33    1.97 
   1  -5   2   33.60    1.55 
   1  -5   2   36.81    1.95 
   1  -5   2   37.44    1.95 
  -2   5  -2   25.34    1.61 
  -2   5  -2   24.85    1.22 
  -2   5  -2   23.80    1.26 
  -2   5  -2   23.92    1.50 
   2  -5   2   24.45    1.62 
   2  -5   2   22.56    1.59 
   2  -5   2   22.75    1.42 
   2  -5   2   20.69    1.48 
   2  -5   2   23.84    1.17 
  -3   5  -2  165.05    5.42 
  -3   5  -2  160.85    6.23 
  -3   5  -2  150.74    5.98 
  -3   5  -2  157.67    5.39 
   3  -5   2  156.89    6.23 
   3  -5   2  156.87    6.04 
   3  -5   2  152.17    5.55 
   3  -5   2  149.44    6.20 
  -4   5  -2    0.60    0.41 
  -4   5  -2    0.19    0.39 
  -4   5  -2    0.25    0.11 
  -4   5  -2    0.36    0.11 
  -4   5  -2    0.02    0.37 
   4  -5   2    0.19    0.26 
   4  -5   2    0.48    0.38 
   4  -5   2    0.13    0.36 
   4  -5   2   -0.08    0.36 
  -5   5  -2   25.27    1.85 
  -5   5  -2   26.02    1.83 
  -5   5  -2   25.06    1.93 
   5  -5   2   29.88    1.63 
   5  -5   2   22.69    2.22 
   5  -5   2   27.49    2.02 
   5  -5   2   22.21    2.13 
  -6   5  -2    2.93    0.91 
  -6   5  -2    4.09    0.93 
  -6   5  -2    3.27    0.86 
   6  -5   2    2.03    0.78 
   6  -5   2    3.54    0.70 
   6  -5   2    4.35    1.01 
   6  -5   2    2.11    0.81 
  -7   5  -2    1.20    0.69 
  -7   5  -2    2.54    0.79 
  -7   5  -2    1.83    0.83 
   7  -5   2    1.18    0.66 
   7  -5   2    0.94    0.67 
   7  -5   2    0.92    0.54 
  -8   5  -2   20.49    2.23 
  -8   5  -2   19.15    2.33 
  -8   5  -2   17.28    2.38 
   8  -5   2   16.88    2.30 
   8  -5   2   17.68    1.85 
   8  -5   2   18.79    2.36 
  -9   5  -2   -0.25    0.50 
  -9   5  -2   -0.36    0.35 
  -9   5  -2    0.46    0.66 
   9  -5   2   -0.74    0.54 
   9  -5   2   -0.34    0.57 
 -10   5  -2   16.12    2.34 
 -10   5  -2   14.40    2.42 
  10  -5   2   13.75    2.29 
  10  -5   2   18.41    2.72 
 -11   5  -2    3.28    1.28 
 -11   5  -2    2.74    1.18 
  11  -5   2    3.16    1.32 
  11  -5   2    5.49    1.69 
  11   4  -2    9.58    1.92 
  11   4  -2   12.12    2.27 
 -11  -4   2    5.89    1.79 
  10   4  -2    0.08    0.71 
  10   4  -2    0.74    0.83 
 -10  -4   2    0.29    0.94 
 -10  -4   2    1.11    0.91 
   9   4  -2    4.25    1.22 
   9   4  -2    5.36    1.36 
   9   4  -2    4.35    1.16 
  -9  -4   2    3.91    1.17 
  -9  -4   2    7.48    1.75 
  -9  -4   2    7.16    1.53 
   8   4  -2   14.35    1.93 
   8   4  -2   12.47    1.93 
   8   4  -2   15.19    1.84 
  -8  -4   2   14.02    1.72 
  -8  -4   2   10.76    1.89 
  -8  -4   2   10.72    1.76 
   7   4  -2   13.25    1.82 
   7   4  -2   14.97    1.80 
   7   4  -2   13.73    1.66 
  -7  -4   2   14.25    1.64 
  -7  -4   2   11.10    1.66 
  -7  -4   2    6.43    1.45 
   6   4  -2   53.77    2.90 
   6   4  -2   54.11    2.15 
   6   4  -2   51.86    2.90 
   6   4  -2   49.83    3.02 
  -6  -4   2   54.20    3.10 
  -6  -4   2   55.00    2.12 
  -6  -4   2   54.75    3.29 
  -6  -4   2   51.30    2.74 
   5   4  -2    4.39    0.81 
   5   4  -2    3.90    0.84 
   5   4  -2    3.83    0.83 
  -5  -4   2    1.88    0.67 
  -5  -4   2    4.23    0.38 
  -5  -4   2    3.42    0.85 
  -5  -4   2    4.95    0.83 
  -5  -4   2    4.07    0.37 
   4   4  -2   97.92    4.30 
   4   4  -2  106.73    4.14 
   4   4  -2  104.97    4.41 
  -4  -4   2   96.82    4.49 
  -4  -4   2   98.14    4.07 
  -4  -4   2  102.96    4.48 
   3   4  -2  119.74    4.43 
   3   4  -2  117.75    4.76 
   3   4  -2  122.86    4.78 
  -3  -4   2  115.18    4.86 
  -3  -4   2  116.14    4.53 
  -3  -4   2  122.05    4.95 
  -3  -4   2  113.36    4.82 
   2   4  -2    4.87    0.29 
   2   4  -2    4.47    0.53 
   2   4  -2    4.76    0.73 
   2   4  -2    5.61    0.72 
  -2  -4   2    6.76    0.96 
  -2  -4   2    5.04    0.84 
  -2  -4   2    6.92    0.81 
  -2  -4   2    4.92    0.29 
  -2  -4   2    4.50    0.77 
   1   4  -2  160.48    5.86 
   1   4  -2  156.32    5.42 
   1   4  -2  157.02    5.66 
   1   4  -2  161.27    5.37 
   1   4  -2  144.25    5.40 
  -1  -4   2  159.29    5.45 
  -1  -4   2  167.48    5.81 
  -1  -4   2  165.17    5.40 
  -1  -4   2  163.42    6.03 
  -1  -4   2  158.00    5.95 
   0   4  -2    7.23    0.55 
   0   4  -2    7.28    0.51 
   0   4  -2    6.94    0.77 
   0   4  -2    7.16    0.85 
   0  -4   2    5.57    0.74 
   0  -4   2    7.79    0.54 
   0  -4   2    6.94    0.71 
   0  -4   2    5.90    0.83 
   0  -4   2    7.75    0.91 
  -1   4  -2   78.11    2.76 
  -1   4  -2   77.10    2.96 
  -1   4  -2   74.79    3.19 
  -1   4  -2   76.58    3.21 
  -1   4  -2   78.00    2.81 
   1  -4   2   74.43    3.21 
   1  -4   2   75.93    2.79 
   1  -4   2   76.64    2.96 
   1  -4   2   78.95    3.19 
   1  -4   2   74.46    3.26 
  -2   4  -2   68.42    3.00 
  -2   4  -2   69.39    2.58 
  -2   4  -2   69.78    3.13 
  -2   4  -2   74.02    2.71 
  -2   4  -2   70.91    2.66 
   2  -4   2   69.51    3.13 
   2  -4   2   68.13    3.12 
   2  -4   2   69.24    2.61 
   2  -4   2   73.83    2.68 
   2  -4   2   70.99    3.18 
   2  -4   2   72.47    2.97 
  -3   4  -2   14.95    0.73 
  -3   4  -2   13.93    0.73 
  -3   4  -2   15.15    1.15 
  -3   4  -2   13.00    1.37 
   3  -4   2   15.91    1.51 
   3  -4   2   14.20    0.71 
   3  -4   2   14.26    0.87 
   3  -4   2   16.39    1.20 
   3  -4   2   16.33    1.55 
  -4   4  -2   59.38    3.02 
  -4   4  -2   61.65    3.14 
  -4   4  -2   64.93    3.05 
   4  -4   2   61.70    3.18 
   4  -4   2   65.48    3.22 
   4  -4   2   68.78    3.18 
   4  -4   2   66.72    2.70 
  -5   4  -2   31.14    2.05 
  -5   4  -2   32.22    2.03 
  -5   4  -2   32.41    2.20 
   5  -4   2   33.80    1.79 
   5  -4   2   35.68    2.21 
   5  -4   2   29.28    2.08 
   5  -4   2   30.79    2.17 
  -6   4  -2    1.15    0.62 
  -6   4  -2    1.12    0.60 
  -6   4  -2    2.53    0.73 
   6  -4   2    2.03    0.57 
   6  -4   2    0.94    0.62 
   6  -4   2    0.00    0.32 
   6  -4   2    2.42    0.79 
  -7   4  -2   10.04    1.50 
  -7   4  -2    6.84    1.39 
  -7   4  -2    6.17    1.20 
   7  -4   2    7.38    1.08 
   7  -4   2    5.06    1.14 
   7  -4   2    6.42    1.33 
  -8   4  -2    1.30    0.71 
  -8   4  -2    0.64    0.61 
  -8   4  -2    2.55    0.86 
   8  -4   2    2.18    0.75 
   8  -4   2    0.69    0.71 
   8  -4   2    0.83    0.59 
  -9   4  -2   16.98    2.15 
  -9   4  -2   15.79    2.37 
  -9   4  -2   20.87    2.46 
   9  -4   2   17.08    1.99 
   9  -4   2   18.12    2.38 
   9  -4   2   19.50    2.58 
 -10   4  -2    4.49    1.24 
 -10   4  -2    2.28    1.10 
  10  -4   2    3.63    1.31 
  10  -4   2    3.63    1.30 
 -11   4  -2    5.44    1.49 
 -11   4  -2    4.42    1.46 
  11  -4   2    4.93    1.56 
  11  -4   2    1.65    1.05 
  11   3  -2   -0.47    0.70 
  11   3  -2    0.88    0.88 
 -11  -3   2   -0.34    0.86 
  10   3  -2    0.74    0.79 
  10   3  -2    2.36    1.05 
 -10  -3   2    3.93    1.23 
 -10  -3   2    2.14    1.24 
   9   3  -2   -0.29    0.50 
   9   3  -2   -0.38    0.47 
   9   3  -2   -0.55    0.46 
  -9  -3   2   -0.28    0.53 
  -9  -3   2    0.65    0.82 
  -9  -3   2    0.07    0.58 
   8   3  -2    4.63    1.17 
   8   3  -2    3.49    0.98 
   8   3  -2    5.14    1.08 
  -8  -3   2    4.38    1.19 
  -8  -3   2    3.59    1.05 
  -8  -3   2    2.90    0.95 
   7   3  -2   14.87    1.93 
   7   3  -2   15.97    1.68 
   7   3  -2   14.78    1.12 
   7   3  -2   14.68    1.77 
  -7  -3   2   14.33    1.66 
  -7  -3   2   15.03    2.00 
  -7  -3   2   16.91    1.15 
  -7  -3   2   16.24    1.97 
   6   3  -2    2.49    0.67 
   6   3  -2    1.76    0.68 
   6   3  -2    1.72    0.43 
   6   3  -2    2.61    0.79 
  -6  -3   2    1.72    0.61 
  -6  -3   2    2.25    0.44 
  -6  -3   2    2.86    0.83 
  -6  -3   2    2.09    0.77 
   5   3  -2   41.47    2.27 
   5   3  -2   39.74    1.75 
   5   3  -2   41.74    2.43 
   5   3  -2   38.13    2.23 
  -5  -3   2   43.25    2.45 
  -5  -3   2   37.46    2.15 
  -5  -3   2   41.16    2.57 
  -5  -3   2   43.04    1.74 
   4   3  -2   12.21    1.30 
   4   3  -2   14.28    1.08 
   4   3  -2   14.20    1.44 
   4   3  -2   13.58    0.71 
  -4  -3   2   13.69    1.51 
  -4  -3   2   15.18    1.34 
  -4  -3   2   12.35    1.36 
  -4  -3   2   13.41    0.69 
  -4  -3   2   13.38    0.70 
   3   3  -2   63.92    2.84 
   3   3  -2   57.88    2.79 
   3   3  -2   61.04    2.59 
  -3  -3   2   57.96    2.91 
  -3  -3   2   64.68    2.12 
  -3  -3   2   63.55    2.92 
  -3  -3   2   61.90    2.11 
  -3  -3   2   63.04    2.69 
   2   3  -2  276.92    9.91 
   2   3  -2  287.23    9.62 
   2   3  -2  290.48    9.29 
   2   3  -2  289.94   10.01 
  -2  -3   2  292.39   10.10 
  -2  -3   2  277.33    9.84 
  -2  -3   2  305.34    9.65 
  -2  -3   2  289.52    9.30 
  -2  -3   2  289.16   10.11 
   1   3  -2    5.08    0.34 
   1   3  -2    5.61    0.60 
   1   3  -2    4.40    0.41 
   1   3  -2    4.08    0.60 
  -1  -3   2    5.22    0.73 
  -1  -3   2    4.35    0.66 
  -1  -3   2    5.24    0.64 
  -1  -3   2    5.44    0.39 
  -1  -3   2    4.46    0.34 
   0   3  -2   84.50    3.28 
   0   3  -2   84.62    2.89 
   0   3  -2   82.85    3.22 
   0   3  -2   82.48    2.98 
   0   3  -2   84.36    3.18 
   0   3  -2   85.12    3.03 
   0  -3   2   81.19    3.32 
   0  -3   2   81.69    3.35 
   0  -3   2   85.18    3.13 
   0  -3   2   85.65    3.00 
   0  -3   2   80.43    2.90 
   0  -3   2   82.38    3.25 
  -1   3  -2    0.23    0.19 
  -1   3  -2    0.57    0.23 
  -1   3  -2   -0.01    0.16 
  -1   3  -2    0.13    0.10 
  -1   3  -2    0.22    0.12 
  -1   3  -2    0.10    0.26 
   1  -3   2    0.15    0.26 
   1  -3   2    0.45    0.29 
   1  -3   2    0.21    0.28 
   1  -3   2    0.04    0.18 
   1  -3   2    0.39    0.21 
   1  -3   2    0.27    0.14 
  -2   3  -2   27.45    1.51 
  -2   3  -2   31.71    1.19 
  -2   3  -2   29.59    1.24 
  -2   3  -2   27.55    1.57 
   2  -3   2   28.23    1.18 
   2  -3   2   24.86    1.53 
   2  -3   2   29.33    1.22 
   2  -3   2   28.84    1.62 
   2  -3   2   28.59    1.49 
  -3   3  -2  104.64    4.22 
  -3   3  -2  108.46    3.60 
  -3   3  -2  103.65    4.22 
  -3   3  -2  104.60    4.30 
  -3   3  -2  107.72    3.92 
   3  -3   2  106.66    4.36 
   3  -3   2  106.17    3.57 
   3  -3   2  106.28    3.82 
   3  -3   2  107.67    4.25 
   3  -3   2   97.69    4.25 
  -4   3  -2    3.88    0.20 
  -4   3  -2    4.88    0.81 
  -4   3  -2    3.84    0.82 
  -4   3  -2    3.72    0.73 
   4  -3   2    3.20    0.74 
   4  -3   2    2.35    0.66 
   4  -3   2    3.84    0.20 
   4  -3   2    3.39    0.55 
   4  -3   2    3.41    0.74 
  -5   3  -2   34.70    2.30 
  -5   3  -2   38.15    2.24 
  -5   3  -2   41.76    2.32 
   5  -3   2   39.98    2.01 
   5  -3   2   42.26    2.45 
   5  -3   2   37.31    2.34 
   5  -3   2   40.60    2.36 
  -6   3  -2   53.79    2.97 
  -6   3  -2   60.08    3.09 
  -6   3  -2   50.41    3.11 
   6  -3   2   53.45    3.10 
   6  -3   2   60.31    2.82 
   6  -3   2   62.84    3.23 
   6  -3   2   55.08    3.19 
  -7   3  -2    0.71    0.48 
  -7   3  -2    0.38    0.46 
  -7   3  -2    0.68    0.52 
   7  -3   2    0.03    0.47 
   7  -3   2    1.20    0.71 
   7  -3   2    0.67    0.49 
  -8   3  -2    4.26    1.02 
  -8   3  -2    3.59    1.00 
  -8   3  -2    3.37    1.11 
   8  -3   2    2.77    0.95 
   8  -3   2    2.78    0.92 
   8  -3   2    3.75    0.90 
  -9   3  -2   -0.29    0.43 
  -9   3  -2    0.32    0.59 
  -9   3  -2    0.54    0.67 
   9  -3   2   -0.18    0.54 
   9  -3   2   -0.79    0.39 
   9  -3   2    0.53    0.81 
 -10   3  -2    2.03    0.97 
 -10   3  -2    1.47    0.94 
  10  -3   2    2.51    1.08 
  10  -3   2    2.37    1.19 
 -11   3  -2    0.28    0.79 
 -11   3  -2    3.09    1.39 
  11  -3   2    2.03    1.19 
  11  -3   2    2.25    1.03 
  11   2  -2    4.24    1.46 
  11   2  -2    8.95    1.97 
 -11  -2   2    2.82    1.41 
  10   2  -2    6.33    1.58 
  10   2  -2    8.36    1.76 
 -10  -2   2    6.79    1.47 
 -10  -2   2    4.04    1.42 
 -10  -2   2    7.98    1.62 
   9   2  -2    3.21    1.12 
   9   2  -2    1.43    0.81 
  -9  -2   2    2.23    0.91 
  -9  -2   2    3.63    1.20 
  -9  -2   2    0.25    0.71 
   8   2  -2   27.93    1.96 
   8   2  -2   26.72    2.76 
   8   2  -2   26.26    2.63 
  -8  -2   2   20.33    2.55 
  -8  -2   2   28.97    2.73 
  -8  -2   2   26.88    2.48 
   7   2  -2    0.40    0.41 
   7   2  -2    0.21    0.43 
   7   2  -2    0.50    0.53 
   7   2  -2    0.26    0.35 
  -7  -2   2    0.38    0.49 
  -7  -2   2   -0.13    0.42 
  -7  -2   2    0.57    0.61 
  -7  -2   2    0.32    0.33 
   6   2  -2   18.81    1.89 
   6   2  -2   20.93    2.05 
   6   2  -2   18.70    1.44 
   6   2  -2   21.14    1.33 
  -6  -2   2   18.69    1.88 
  -6  -2   2   22.44    1.62 
  -6  -2   2   16.22    1.94 
   5   2  -2    6.72    0.76 
   5   2  -2    5.58    0.95 
   5   2  -2    6.76    1.09 
   5   2  -2    8.30    1.04 
  -5  -2   2    6.40    1.12 
  -5  -2   2    5.83    0.97 
  -5  -2   2    8.07    1.04 
  -5  -2   2    6.19    0.69 
   4   2  -2  142.50    5.29 
   4   2  -2  146.80    5.30 
   4   2  -2  127.63    5.37 
   4   2  -2  136.72    4.84 
  -4  -2   2  137.25    5.55 
  -4  -2   2  133.11    5.34 
  -4  -2   2  134.19    4.78 
  -4  -2   2  135.81    5.24 
   3   2  -2  311.75   10.79 
   3   2  -2  317.18   10.45 
   3   2  -2  307.54   11.00 
   3   2  -2  311.37   10.90 
  -3  -2   2  321.97   10.42 
  -3  -2   2  334.37   11.22 
  -3  -2   2  317.99   11.00 
  -3  -2   2  315.61   10.88 
  -3  -2   2  324.70   10.44 
   2   2  -2  177.08    5.97 
   2   2  -2  173.01    6.20 
   2   2  -2  177.23    5.73 
   2   2  -2  164.93    6.19 
  -2  -2   2  178.12    5.76 
  -2  -2   2  169.95    5.73 
  -2  -2   2  176.56    5.97 
  -2  -2   2  174.75    6.16 
  -2  -2   2  177.89    6.27 
  -2  -2   2  171.50    6.31 
   1   2  -2    5.23    0.60 
   1   2  -2    6.13    0.35 
   1   2  -2    5.56    0.38 
   1   2  -2    6.19    0.60 
  -1  -2   2    5.88    0.34 
  -1  -2   2    5.78    0.67 
  -1  -2   2    5.41    0.65 
  -1  -2   2    6.32    0.64 
  -1  -2   2    5.90    0.38 
   0   2  -2   43.42    1.56 
   0   2  -2   40.27    1.42 
   0   2  -2   42.92    1.74 
   0   2  -2   40.94    1.78 
   0   2  -2   44.09    1.69 
   0  -2   2   42.06    1.56 
   0  -2   2   39.44    1.80 
   0  -2   2   41.18    1.83 
   0  -2   2   41.11    1.43 
   0  -2   2   39.88    1.72 
   0  -2   2   39.65    1.66 
   0  -2   2   41.76    1.78 
  -1   2  -2   14.01    0.78 
  -1   2  -2   16.05    0.81 
  -1   2  -2   14.38    0.92 
  -1   2  -2   15.59    0.92 
   1  -2   2   16.76    0.96 
   1  -2   2   14.42    0.95 
   1  -2   2   14.96    0.78 
   1  -2   2   15.41    0.95 
   1  -2   2   15.70    0.80 
  -2   2  -2    0.82    0.36 
  -2   2  -2    0.80    0.20 
  -2   2  -2    0.62    0.29 
  -2   2  -2    0.79    0.18 
   2  -2   2    0.97    0.34 
   2  -2   2    1.26    0.23 
   2  -2   2    0.88    0.32 
   2  -2   2    0.81    0.19 
   2  -2   2    0.92    0.33 
  -3   2  -2   33.23    1.63 
  -3   2  -2   30.34    1.66 
  -3   2  -2   28.50    1.16 
  -3   2  -2   28.39    1.66 
   3  -2   2   27.22    1.59 
   3  -2   2   27.05    1.63 
   3  -2   2   28.17    1.32 
   3  -2   2   29.97    1.16 
   3  -2   2   29.16    1.62 
  -4   2  -2  295.84    9.54 
  -4   2  -2  286.43   10.33 
  -4   2  -2  282.42   10.43 
  -4   2  -2  297.18   10.23 
   4  -2   2  295.10    9.95 
   4  -2   2  286.88   10.39 
   4  -2   2  285.90   10.38 
   4  -2   2  299.90    9.53 
   4  -2   2  286.85   10.29 
  -5   2  -2   31.80    2.08 
  -5   2  -2   30.94    1.31 
  -5   2  -2   30.92    1.89 
  -5   2  -2   36.46    2.09 
   5  -2   2   29.03    1.98 
   5  -2   2   29.84    1.72 
   5  -2   2   30.27    1.97 
   5  -2   2   31.80    1.29 
   5  -2   2   31.29    1.96 
   5  -2   2   37.18    1.36 
  -6   2  -2    2.99    0.77 
  -6   2  -2    4.58    0.99 
  -6   2  -2    4.39    0.88 
   6  -2   2    4.06    0.95 
   6  -2   2    5.57    0.52 
   6  -2   2    3.86    0.42 
   6  -2   2    4.62    0.99 
   6  -2   2    4.18    0.78 
  -7   2  -2   39.51    2.73 
  -7   2  -2   32.66    2.25 
  -7   2  -2   39.42    2.52 
   7  -2   2   37.13    2.26 
   7  -2   2   34.66    2.44 
   7  -2   2   38.32    2.65 
  -8   2  -2    0.48    0.61 
  -8   2  -2    1.26    0.68 
  -8   2  -2   -0.10    0.45 
   8  -2   2    0.20    0.54 
   8  -2   2    0.24    0.53 
   8  -2   2    0.64    0.69 
  -9   2  -2   14.41    2.03 
  -9   2  -2   17.78    2.11 
  -9   2  -2   17.15    2.40 
   9  -2   2   11.96    1.70 
   9  -2   2   16.63    2.15 
   9  -2   2   16.06    2.34 
 -10   2  -2    2.27    1.15 
 -10   2  -2    5.27    1.39 
 -10   2  -2    4.53    1.20 
  10  -2   2    3.51    1.17 
  10  -2   2    2.81    1.23 
  10  -2   2    2.81    1.01 
 -11   2  -2    1.36    0.92 
  11  -2   2    0.76    1.07 
  11  -2   2    6.18    1.57 
  12  -2   2    3.16    1.57 
  11   1  -2    1.13    1.05 
  11   1  -2    0.39    0.84 
 -11  -1   2    2.32    1.28 
  10   1  -2   13.08    2.10 
  10   1  -2   11.99    2.08 
 -10  -1   2   12.31    2.20 
 -10  -1   2   14.03    2.07 
   9   1  -2   20.48    2.54 
   9   1  -2   24.18    2.75 
  -9  -1   2   26.42    2.62 
  -9  -1   2   24.71    2.56 
  -9  -1   2   20.76    2.69 
   8   1  -2   10.09    1.68 
   8   1  -2   11.11    1.42 
   8   1  -2   12.36    1.81 
   8   1  -2    9.49    1.26 
  -8  -1   2    9.47    1.51 
  -8  -1   2    8.50    1.58 
  -8  -1   2   11.76    1.61 
   7   1  -2   69.45    3.18 
   7   1  -2   66.04    3.16 
   7   1  -2   55.65    3.44 
   7   1  -2   63.44    3.54 
  -7  -1   2   65.49    3.42 
  -7  -1   2   59.36    3.60 
  -7  -1   2   70.51    3.50 
   6   1  -2    0.39    0.34 
   6   1  -2    0.42    0.41 
   6   1  -2    0.69    0.47 
   6   1  -2    0.91    0.41 
  -6  -1   2    1.21    0.54 
  -6  -1   2    0.86    0.54 
  -6  -1   2    0.42    0.57 
   5   1  -2   43.08    2.14 
   5   1  -2   43.41    2.08 
   5   1  -2   40.14    2.37 
   5   1  -2   42.40    2.36 
  -5  -1   2   37.08    2.39 
  -5  -1   2   45.85    2.36 
  -5  -1   2   44.06    2.30 
   4   1  -2    0.80    0.38 
   4   1  -2    1.78    0.40 
   4   1  -2    1.21    0.40 
   4   1  -2    0.97    0.35 
  -4  -1   2    0.73    0.39 
  -4  -1   2    1.07    0.44 
  -4  -1   2    1.67    0.48 
   3   1  -2   86.91    3.35 
   3   1  -2   77.28    3.41 
   3   1  -2   84.11    3.11 
   3   1  -2   85.81    3.30 
  -3  -1   2   84.43    3.07 
  -3  -1   2   80.87    3.32 
  -3  -1   2   81.92    3.49 
  -3  -1   2   85.30    3.11 
  -3  -1   2   80.63    3.35 
   2   1  -2  754.95   24.54 
   2   1  -2  774.13   24.47 
   2   1  -2  788.21   24.38 
  -2  -1   2  789.42   24.24 
  -2  -1   2  756.61   24.63 
  -2  -1   2  645.63   24.15 
  -2  -1   2  742.06   24.46 
  -2  -1   2  761.71   24.51 
   1   1  -2  120.04    4.27 
   1   1  -2  117.76    4.28 
   1   1  -2  121.51    4.27 
   1   1  -2  121.23    4.31 
   1   1  -2  120.18    4.24 
   1   1  -2  118.00    4.03 
   1   1  -2  122.37    4.08 
  -1  -1   2  124.93    4.28 
  -1  -1   2  118.53    4.07 
  -1  -1   2  123.08    4.25 
  -1  -1   2  122.79    4.04 
  -1  -1   2  113.36    4.27 
  -1  -1   2  125.94    4.43 
  -1  -1   2  116.58    4.27 
   0   1  -2   18.97    0.92 
   0   1  -2   18.19    0.87 
   0   1  -2   19.28    0.93 
   0   1  -2   17.15    0.76 
   0   1  -2   18.42    0.92 
   0   1  -2   18.03    0.66 
   0   1  -2   18.21    0.89 
   0  -1   2   18.67    0.93 
   0  -1   2   18.69    0.67 
   0  -1   2   17.37    0.85 
   0  -1   2   17.97    0.91 
   0  -1   2   19.70    0.92 
   0  -1   2   18.00    0.76 
   0  -1   2   19.15    0.91 
  -1   1  -2   27.37    1.30 
  -1   1  -2   28.14    1.29 
  -1   1  -2   27.57    1.26 
  -1   1  -2   26.72    1.15 
  -1   1  -2   26.93    1.17 
  -1   1  -2   25.85    1.23 
   1  -1   2   25.84    1.25 
   1  -1   2   27.47    1.26 
   1  -1   2   28.18    1.18 
   1  -1   2   29.92    1.18 
   1  -1   2   27.70    1.28 
   1  -1   2   27.13    1.29 
   1  -1   2   27.69    1.25 
  -2   1  -2   47.15    1.73 
  -2   1  -2   46.83    2.08 
  -2   1  -2   45.61    1.77 
  -2   1  -2   45.56    2.03 
   2  -1   2   48.28    1.78 
   2  -1   2   43.01    2.01 
   2  -1   2   46.52    1.74 
   2  -1   2   47.13    2.00 
   2  -1   2   45.06    1.98 
  -3   1  -2  102.24    3.91 
  -3   1  -2   99.42    4.08 
  -3   1  -2  104.47    4.10 
  -3   1  -2  103.30    3.62 
   3  -1   2  104.58    3.77 
   3  -1   2   97.27    3.94 
   3  -1   2  106.15    4.08 
   3  -1   2  100.24    4.06 
   3  -1   2  107.54    3.64 
  -4   1  -2    8.44    0.58 
  -4   1  -2    6.68    0.95 
  -4   1  -2    8.98    0.96 
  -4   1  -2    8.59    1.10 
   4  -1   2    7.71    0.58 
   4  -1   2    7.80    0.97 
   4  -1   2    7.73    1.02 
   4  -1   2    9.60    1.03 
   4  -1   2    7.23    0.81 
  -5   1  -2   27.18    1.92 
  -5   1  -2   32.27    1.41 
  -5   1  -2   29.77    1.74 
  -5   1  -2   28.70    1.85 
   5  -1   2   26.76    1.80 
   5  -1   2   31.13    1.71 
   5  -1   2   24.15    1.79 
  -6   1  -2   51.21    2.81 
  -6   1  -2   49.76    2.09 
  -6   1  -2   45.67    2.83 
  -6   1  -2   45.79    2.51 
   6  -1   2   44.95    2.78 
   6  -1   2   47.18    2.67 
   6  -1   2   49.88    2.56 
   6  -1   2   48.08    2.04 
  -7   1  -2    2.02    0.72 
  -7   1  -2    3.13    0.96 
  -7   1  -2    3.89    0.96 
   7  -1   2    2.87    0.84 
   7  -1   2    3.46    0.96 
   7  -1   2    3.38    0.53 
   7  -1   2    2.74    0.76 
  -8   1  -2   19.27    1.98 
  -8   1  -2   17.14    2.23 
  -8   1  -2   16.67    2.06 
   8  -1   2   19.64    2.17 
   8  -1   2   17.51    1.98 
   8  -1   2   16.16    2.15 
  -9   1  -2    9.08    1.58 
  -9   1  -2    4.88    1.20 
  -9   1  -2    1.83    1.01 
   9  -1   2    5.99    1.40 
   9  -1   2    5.43    1.25 
   9  -1   2    5.30    1.19 
 -10   1  -2    0.76    0.76 
 -10   1  -2    0.41    0.89 
 -10   1  -2    0.77    0.73 
  10  -1   2    0.44    0.71 
  10  -1   2    0.79    0.92 
  10  -1   2    0.43    0.67 
 -11   1  -2    4.73    1.63 
  11  -1   2    6.04    1.50 
  11  -1   2    9.75    2.14 
 -12   1  -2   -0.50    1.01 
  12  -1   2    1.60    1.26 
  11   0  -2   11.91    2.27 
  11   0  -2    6.56    1.70 
 -11   0   2    8.26    1.95 
 -11   0   2   13.20    2.13 
  10   0  -2    5.34    1.41 
  10   0  -2    1.85    0.99 
 -10   0   2    1.67    1.08 
 -10   0   2    2.22    1.01 
   9   0  -2    6.58    1.26 
   9   0  -2    5.66    1.33 
   9   0  -2    5.83    1.41 
  -9   0   2    7.36    1.46 
  -9   0   2    6.00    1.25 
  -9   0   2    4.73    1.29 
   8   0  -2   38.53    2.80 
   8   0  -2   43.87    2.63 
   8   0  -2   38.94    2.79 
  -8   0   2   41.84    2.76 
  -8   0   2   41.60    2.66 
  -8   0   2   37.28    2.93 
   7   0  -2    2.40    0.71 
   7   0  -2    2.63    0.83 
   7   0  -2    3.09    0.68 
   7   0  -2    2.49    0.84 
  -7   0   2    1.37    0.68 
  -7   0   2    3.80    0.89 
  -7   0   2    4.45    1.09 
   6   0  -2   20.41    1.51 
   6   0  -2   23.55    1.76 
   6   0  -2   20.85    2.04 
   6   0  -2   20.06    1.34 
  -6   0   2   20.68    2.13 
  -6   0   2   20.10    1.93 
  -6   0   2   19.83    1.52 
   5   0  -2   15.47    1.05 
   5   0  -2   13.79    1.49 
   5   0  -2   14.75    1.38 
   5   0  -2   11.01    1.34 
  -5   0   2   13.05    1.40 
  -5   0   2   13.88    1.57 
  -5   0   2   11.93    1.29 
   4   0  -2  174.19    6.74 
   4   0  -2  178.49    6.49 
   4   0  -2  182.45    6.40 
   4   0  -2  185.17    6.76 
  -4   0   2  176.47    6.49 
  -4   0   2  177.00    6.84 
  -4   0   2  184.63    6.71 
   3   0  -2  205.73    7.10 
   3   0  -2  206.95    7.31 
   3   0  -2  210.04    7.39 
   3   0  -2  198.81    7.13 
  -3   0   2  206.15    7.11 
  -3   0   2  204.26    7.09 
  -3   0   2  202.34    7.40 
  -3   0   2  209.19    7.33 
   2   0  -2    0.07    0.21 
   2   0  -2   -0.05    0.22 
   2   0  -2    0.08    0.22 
   2   0  -2    0.08    0.26 
   2   0  -2    0.05    0.21 
  -2   0   2   -0.13    0.17 
  -2   0   2   -0.41    0.22 
  -2   0   2   -0.20    0.19 
  -2   0   2    0.12    0.19 
  -2   0   2    0.40    0.31 
   1   0  -2   79.58    2.93 
   1   0  -2   77.78    2.85 
   1   0  -2   81.51    2.79 
   1   0  -2   82.09    2.87 
   1   0  -2   83.05    2.98 
   1   0  -2   80.05    2.82 
   1   0  -2   80.98    2.92 
  -1   0   2   79.75    2.85 
  -1   0   2   81.16    2.90 
  -1   0   2   82.20    2.97 
  -1   0   2   78.17    2.92 
  -1   0   2   80.89    2.87 
  -1   0   2   79.06    2.81 
  -1   0   2   76.29    2.96 
  -1   0   2   82.77    2.94 
   0   0  -2  567.99   18.27 
   0   0  -2  576.38   18.24 
   0   0  -2  609.08   18.35 
   0   0  -2  559.78   18.29 
   0   0  -2  579.06   18.27 
   0   0  -2  553.54   18.20 
   0   0   2  481.26   18.25 
   0   0   2  577.08   18.20 
   0   0   2  569.66   18.27 
   0   0   2  579.58   18.24 
   0   0   2  559.07   18.27 
  -1   0  -2   71.05    2.55 
  -1   0  -2   68.37    2.60 
  -1   0  -2   72.44    2.65 
  -1   0  -2   71.43    2.55 
  -1   0  -2   70.49    2.52 
  -1   0  -2   68.28    2.42 
  -1   0  -2   68.93    2.49 
   1   0   2   68.22    2.60 
   1   0   2   67.41    2.49 
   1   0   2   69.24    2.54 
   1   0   2   67.81    2.40 
   1   0   2   69.15    2.43 
   1   0   2   69.54    2.51 
   1   0   2   70.27    2.55 
  -2   0  -2   90.79    3.41 
  -2   0  -2   98.16    3.46 
  -2   0  -2   96.46    3.60 
  -2   0  -2   96.45    3.69 
  -2   0  -2   99.88    3.41 
   2   0   2   94.81    3.45 
   2   0   2   96.38    3.45 
   2   0   2   99.55    3.63 
   2   0   2   93.61    3.59 
   2   0   2   95.25    3.40 
  -3   0  -2    5.02    0.71 
  -3   0  -2    4.68    0.71 
  -3   0  -2    4.45    0.53 
  -3   0  -2    3.63    0.50 
   3   0   2    4.15    0.57 
   3   0   2    4.51    0.66 
   3   0   2    4.57    0.69 
   3   0   2    4.96    0.56 
   3   0   2    4.12    0.54 
  -4   0  -2   52.13    2.66 
  -4   0  -2   53.29    2.70 
  -4   0  -2   54.75    2.30 
  -4   0  -2   58.98    2.46 
   4   0   2   54.47    2.47 
   4   0   2   56.40    2.71 
   4   0   2   58.80    2.51 
   4   0   2   55.71    2.59 
  -5   0  -2   26.61    1.53 
  -5   0  -2   24.49    1.32 
  -5   0  -2   19.90    1.59 
  -5   0  -2   22.00    1.69 
   5   0   2   24.32    1.53 
   5   0   2   20.37    1.60 
   5   0   2   25.04    1.60 
  -6   0  -2    0.36    0.40 
  -6   0  -2   -0.09    0.30 
  -6   0  -2    0.17    0.26 
  -6   0  -2    0.32    0.32 
   6   0   2   -0.17    0.26 
   6   0   2    0.14    0.34 
   6   0   2    0.06    0.23 
   6   0   2   -0.24    0.29 
  -7   0  -2   19.19    1.81 
  -7   0  -2   17.33    2.15 
  -7   0  -2   17.46    1.23 
  -7   0  -2   20.52    2.16 
   7   0   2   16.76    1.79 
   7   0   2   19.02    2.13 
   7   0   2   19.96    1.26 
   7   0   2   18.67    1.87 
  -8   0  -2    1.53    0.77 
  -8   0  -2    0.36    0.57 
  -8   0  -2    0.94    0.62 
   8   0   2    1.90    0.74 
   8   0   2    0.15    0.48 
   8   0   2    1.36    0.81 
  -9   0  -2   -0.08    0.68 
  -9   0  -2    0.86    0.58 
  -9   0  -2    0.07    0.50 
   9   0   2    3.15    0.99 
   9   0   2    0.01    0.48 
   9   0   2    0.41    0.56 
 -10   0  -2   10.86    2.08 
 -10   0  -2   14.50    2.90 
 -10   0  -2   11.35    1.97 
  10   0   2    9.05    1.89 
  10   0   2   13.28    1.96 
  10   0   2   12.91    1.87 
 -11   0  -2    1.68    1.03 
 -11   0  -2    1.34    1.20 
  11   0   2    1.42    0.88 
  11   0   2    1.43    1.08 
 -12   0  -2    0.19    0.85 
  12   0   2    1.35    1.29 
  11  -1  -2    2.07    1.11 
  11  -1  -2    1.55    0.93 
 -11   1   2    0.78    0.99 
 -11   1   2    1.80    1.08 
  10  -1  -2    5.04    1.47 
  10  -1  -2    2.65    1.07 
 -10   1   2    4.71    1.35 
 -10   1   2    3.18    1.16 
   9  -1  -2   11.38    1.95 
   9  -1  -2   10.67    1.77 
   9  -1  -2    9.63    1.61 
  -9   1   2   10.36    1.73 
  -9   1   2    8.35    1.76 
   8  -1  -2    5.77    1.25 
   8  -1  -2    8.86    1.36 
   8  -1  -2    8.58    1.57 
  -8   1   2    9.88    1.55 
  -8   1   2    7.23    1.54 
  -8   1   2    7.69    1.31 
   7  -1  -2   84.95    3.34 
   7  -1  -2   76.91    3.82 
   7  -1  -2   68.04    3.86 
   7  -1  -2   72.18    4.00 
  -7   1   2   76.45    3.71 
  -7   1   2   77.35    4.21 
  -7   1   2   81.20    4.00 
   6  -1  -2   16.98    1.15 
   6  -1  -2   19.47    1.96 
   6  -1  -2   18.28    1.88 
   6  -1  -2   20.71    1.90 
  -6   1   2   18.09    1.83 
  -6   1   2   19.35    2.02 
  -6   1   2   18.76    1.39 
   5  -1  -2    8.28    1.20 
   5  -1  -2   10.38    0.93 
   5  -1  -2    9.28    1.25 
   5  -1  -2    7.92    1.05 
  -5   1   2    9.16    1.00 
  -5   1   2   10.49    1.39 
  -5   1   2    9.57    1.25 
   4  -1  -2   29.84    1.74 
   4  -1  -2   26.95    1.70 
   4  -1  -2   26.62    1.60 
   4  -1  -2   27.48    1.36 
  -4   1   2   28.41    1.75 
  -4   1   2   25.62    1.40 
  -4   1   2   27.24    1.67 
   3  -1  -2    0.20    0.21 
   3  -1  -2    0.07    0.28 
   3  -1  -2    0.44    0.23 
   3  -1  -2    0.60    0.32 
   3  -1  -2    0.14    0.24 
  -3   1   2    0.72    0.37 
  -3   1   2    0.39    0.22 
  -3   1   2    0.09    0.22 
   2  -1  -2  441.25   13.71 
   2  -1  -2  417.59   14.11 
   2  -1  -2  404.17   14.05 
   2  -1  -2  424.53   14.06 
   2  -1  -2  414.37   13.85 
  -2   1   2  424.58   14.06 
  -2   1   2  449.42   13.87 
  -2   1   2  418.01   13.69 
  -2   1   2  406.65   13.97 
  -2   1   2  427.60   14.11 
   1  -1  -2  295.98    9.00 
   1  -1  -2  236.73    9.42 
   1  -1  -2  290.46    9.35 
   1  -1  -2  286.27    9.40 
   1  -1  -2  283.10    9.23 
   1  -1  -2  285.73    9.36 
   1  -1  -2  278.27    9.27 
   1  -1  -2  262.61    9.00 
   1  -1  -2  265.71    9.36 
  -1   1   2  296.12    9.30 
  -1   1   2  281.14    9.36 
  -1   1   2  295.46    9.42 
  -1   1   2  281.15    9.35 
  -1   1   2  283.07    9.34 
  -1   1   2  282.71    9.23 
   0  -1  -2    3.22    0.40 
   0  -1  -2    2.33    0.28 
   0  -1  -2    2.00    0.28 
   0  -1  -2    2.04    0.31 
   0  -1  -2    2.35    0.34 
   0  -1  -2    2.74    0.35 
   0   1   2    2.97    0.39 
   0   1   2    2.81    0.31 
   0   1   2    2.73    0.36 
   0   1   2    2.40    0.32 
   0   1   2    2.45    0.34 
   0   1   2    2.47    0.32 
   0   1   2    2.70    0.29 
  -1  -1  -2   66.19    2.43 
  -1  -1  -2   65.25    2.49 
  -1  -1  -2   67.18    2.45 
  -1  -1  -2   61.48    2.21 
  -1  -1  -2   64.11    2.40 
  -1  -1  -2   65.12    2.30 
  -1  -1  -2   61.05    2.44 
   1   1   2   64.85    2.50 
   1   1   2   66.45    2.44 
   1   1   2   62.71    2.21 
   1   1   2   67.88    2.31 
   1   1   2   63.66    2.41 
   1   1   2   63.54    2.44 
   1   1   2   63.21    2.42 
   1   1   2   65.39    2.37 
  -2  -1  -2  133.07    4.76 
  -2  -1  -2  132.20    4.74 
  -2  -1  -2  129.59    4.50 
  -2  -1  -2  137.34    4.92 
  -2  -1  -2  134.13    4.48 
   2   1   2  136.35    4.85 
   2   1   2  134.41    4.71 
   2   1   2  132.74    4.51 
   2   1   2  131.22    4.73 
  -3  -1  -2  323.97   10.94 
  -3  -1  -2  313.41   10.54 
  -3  -1  -2  333.63   10.60 
  -3  -1  -2  310.90   11.02 
  -3  -1  -2  312.24   10.74 
   3   1   2  308.45   10.76 
   3   1   2  317.82   10.78 
   3   1   2  317.11   10.58 
   3   1   2  325.72   10.98 
  -4  -1  -2   40.72    1.93 
  -4  -1  -2   37.43    2.17 
  -4  -1  -2   41.95    1.84 
  -4  -1  -2   41.85    2.20 
   4   1   2   40.15    2.03 
   4   1   2   38.59    1.96 
   4   1   2   39.46    2.17 
  -5  -1  -2    6.88    1.07 
  -5  -1  -2    7.76    0.91 
  -5  -1  -2    7.61    0.90 
  -5  -1  -2    8.50    1.19 
   5   1   2    7.47    0.96 
   5   1   2    7.14    1.08 
   5   1   2    7.72    0.99 
  -6  -1  -2   16.75    1.83 
  -6  -1  -2   17.51    1.54 
  -6  -1  -2   17.01    1.23 
  -6  -1  -2   18.23    1.95 
   6   1   2   16.42    1.65 
   6   1   2   16.42    1.80 
   6   1   2   17.71    1.36 
   6   1   2   15.53    1.14 
  -7  -1  -2    1.23    0.53 
  -7  -1  -2    1.02    0.57 
  -7  -1  -2    0.07    0.35 
  -7  -1  -2    0.44    0.55 
   7   1   2    0.02    0.31 
   7   1   2    0.61    0.49 
   7   1   2   -0.09    0.44 
   7   1   2    0.69    0.43 
  -8  -1  -2   17.96    1.66 
  -8  -1  -2   14.52    2.08 
  -8  -1  -2   17.60    1.80 
  -8  -1  -2   18.94    2.20 
   8   1   2   17.53    1.59 
   8   1   2   16.74    1.94 
   8   1   2   14.90    1.75 
   8   1   2   13.54    1.97 
  -9  -1  -2    3.88    1.26 
  -9  -1  -2    4.41    1.05 
  -9  -1  -2    4.99    1.33 
   9   1   2    3.91    1.00 
   9   1   2    1.89    0.82 
   9   1   2    4.78    1.27 
 -10  -1  -2    1.97    1.15 
 -10  -1  -2    2.26    1.01 
  10   1   2    2.00    1.10 
  10   1   2    1.07    0.75 
 -11  -1  -2    6.90    1.70 
 -11  -1  -2    6.92    1.90 
  11   1   2    6.49    1.55 
  11   1   2    6.83    1.86 
 -12  -1  -2    0.20    1.07 
  12   1   2    0.23    0.78 
  12   1   2    1.04    1.21 
  11  -2  -2    2.36    1.09 
  11  -2  -2    3.87    1.42 
 -11   2   2    1.71    1.13 
 -11   2   2    0.13    0.92 
  10  -2  -2    0.81    0.88 
  10  -2  -2    0.84    0.76 
  10  -2  -2    0.86    0.73 
 -10   2   2    1.72    1.03 
 -10   2   2    2.10    0.94 
 -10   2   2    1.07    0.87 
   9  -2  -2    6.45    1.34 
   9  -2  -2    5.81    1.36 
   9  -2  -2    8.59    1.70 
  -9   2   2    6.91    1.58 
  -9   2   2    6.11    1.37 
   8  -2  -2   27.58    2.65 
   8  -2  -2   27.70    2.83 
   8  -2  -2   28.56    2.73 
  -8   2   2   26.40    2.81 
  -8   2   2   28.04    2.04 
  -8   2   2   28.64    2.74 
   7  -2  -2    3.15    0.96 
   7  -2  -2    2.68    0.80 
   7  -2  -2    3.03    0.90 
  -7   2   2    2.81    0.99 
  -7   2   2    1.68    0.60 
  -7   2   2    3.51    0.94 
   6  -2  -2   45.72    2.58 
   6  -2  -2   43.48    1.89 
   6  -2  -2   41.63    2.51 
   6  -2  -2   40.80    2.60 
  -6   2   2   38.55    2.49 
  -6   2   2   39.44    2.16 
  -6   2   2   34.41    2.47 
   5  -2  -2   62.36    3.16 
   5  -2  -2   59.32    2.44 
   5  -2  -2   58.58    3.01 
   5  -2  -2   64.85    3.12 
  -5   2   2   62.43    2.71 
  -5   2   2   61.33    3.07 
  -5   2   2   59.62    3.13 
   4  -2  -2   25.22    1.16 
   4  -2  -2   21.76    1.50 
   4  -2  -2   23.09    1.56 
   4  -2  -2   23.15    1.54 
  -4   2   2   19.21    1.43 
  -4   2   2   22.87    1.22 
  -4   2   2   21.81    1.52 
   3  -2  -2   12.17    1.16 
   3  -2  -2   11.41    0.67 
   3  -2  -2   11.24    1.13 
   3  -2  -2   12.45    1.15 
   3  -2  -2   10.50    0.67 
  -3   2   2   10.45    0.65 
  -3   2   2    9.98    1.05 
  -3   2   2   11.51    1.13 
  -3   2   2   12.59    0.70 
   2  -2  -2   42.60    1.50 
   2  -2  -2   43.51    1.99 
   2  -2  -2   41.40    1.71 
   2  -2  -2   42.55    1.95 
   2  -2  -2   42.95    2.00 
  -2   2   2   42.88    1.70 
  -2   2   2   43.32    1.89 
  -2   2   2   39.96    1.92 
  -2   2   2   41.69    1.93 
  -2   2   2   42.08    1.50 
   1  -2  -2  126.16    4.09 
   1  -2  -2  124.40    4.40 
   1  -2  -2  129.20    4.58 
   1  -2  -2  124.12    4.59 
   1  -2  -2  128.49    4.34 
   1  -2  -2  123.41    4.54 
  -1   2   2  125.94    4.49 
  -1   2   2  125.38    4.08 
  -1   2   2  128.78    4.41 
  -1   2   2  126.12    4.33 
  -1   2   2  122.42    4.52 
   0  -2  -2    5.40    0.55 
   0  -2  -2    4.93    0.27 
   0  -2  -2    4.80    0.53 
   0  -2  -2    4.35    0.42 
   0  -2  -2    5.77    0.62 
   0  -2  -2    5.35    0.57 
   0  -2  -2    4.94    0.44 
   0   2   2    5.86    0.59 
   0   2   2    4.96    0.26 
   0   2   2    4.74    0.43 
   0   2   2    5.30    0.55 
   0   2   2    4.85    0.28 
   0   2   2    4.70    0.43 
   0   2   2    4.64    0.49 
   0   2   2    5.09    0.54 
  -1  -2  -2    1.38    0.35 
  -1  -2  -2    2.50    0.39 
  -1  -2  -2    1.79    0.28 
  -1  -2  -2    2.00    0.17 
  -1  -2  -2    1.64    0.39 
  -1  -2  -2    2.39    0.44 
   1   2   2    2.26    0.37 
   1   2   2    1.89    0.18 
   1   2   2    2.37    0.32 
   1   2   2    1.13    0.31 
   1   2   2    2.33    0.39 
  -2  -2  -2  251.79    8.77 
  -2  -2  -2  255.54    8.24 
  -2  -2  -2  257.20    8.77 
  -2  -2  -2  263.10    8.61 
  -2  -2  -2  254.29    8.67 
  -2  -2  -2  261.16    8.24 
  -2  -2  -2  251.43    8.87 
   2   2   2  251.48    8.59 
   2   2   2  251.21    8.70 
   2   2   2  255.74    8.77 
  -3  -2  -2   24.78    1.06 
  -3  -2  -2   22.27    1.47 
  -3  -2  -2   22.51    1.34 
  -3  -2  -2   24.29    1.04 
  -3  -2  -2   22.58    1.37 
   3   2   2   23.44    1.23 
   3   2   2   21.59    1.30 
   3   2   2   23.57    1.42 
  -4  -2  -2   58.65    2.98 
  -4  -2  -2   62.38    2.48 
  -4  -2  -2   62.81    2.80 
  -4  -2  -2   62.77    2.93 
   4   2   2   64.04    2.97 
   4   2   2   64.24    2.85 
   4   2   2   62.55    2.67 
  -5  -2  -2   40.43    2.10 
  -5  -2  -2   37.96    1.86 
  -5  -2  -2   39.23    2.33 
  -5  -2  -2   41.79    2.39 
   5   2   2   35.94    1.95 
   5   2   2   36.84    2.25 
   5   2   2   38.66    2.18 
  -6  -2  -2    3.09    0.61 
  -6  -2  -2    1.42    0.59 
  -6  -2  -2    2.54    0.63 
  -6  -2  -2    2.16    0.76 
   6   2   2    2.27    0.56 
   6   2   2    3.23    0.67 
   6   2   2    2.22    0.67 
   6   2   2    2.87    0.77 
  -7  -2  -2   13.54    1.80 
  -7  -2  -2   15.47    1.57 
  -7  -2  -2   17.06    2.07 
  -7  -2  -2   15.97    1.55 
   7   2   2   16.87    1.55 
   7   2   2   17.99    1.94 
   7   2   2   13.91    1.83 
   7   2   2   15.09    1.54 
  -8  -2  -2    4.60    0.95 
  -8  -2  -2    5.16    1.02 
  -8  -2  -2    6.76    1.45 
  -8  -2  -2    4.29    1.12 
   8   2   2    4.44    0.89 
   8   2   2    4.64    0.98 
   8   2   2    5.57    1.27 
   8   2   2    4.92    1.12 
  -9  -2  -2   13.48    2.08 
  -9  -2  -2   10.26    1.92 
   9   2   2   14.88    2.14 
   9   2   2   15.06    2.03 
   9   2   2   10.97    1.79 
 -10  -2  -2   10.75    2.07 
 -10  -2  -2   10.61    2.03 
  10   2   2   13.44    2.05 
  10   2   2   15.54    2.35 
 -11  -2  -2    0.37    0.93 
 -11  -2  -2    0.73    0.95 
  11   2   2    0.56    0.83 
  11   2   2    0.48    0.69 
 -12  -2  -2    1.52    1.34 
  12   2   2    4.63    1.53 
  12   2   2    2.75    1.36 
  11  -3  -2    4.42    1.34 
  11  -3  -2    4.28    1.53 
 -11   3   2    3.75    1.42 
 -11   3   2    3.05    1.37 
  10  -3  -2    0.68    0.72 
  10  -3  -2   -0.32    0.62 
  10  -3  -2    0.58    0.68 
 -10   3   2    0.29    0.62 
 -10   3   2    0.24    0.86 
 -10   3   2    0.09    0.70 
   9  -3  -2    6.86    1.49 
   9  -3  -2    5.19    1.27 
   9  -3  -2    8.31    1.67 
  -9   3   2    7.14    1.69 
  -9   3   2    6.38    1.39 
   8  -3  -2    4.69    1.24 
   8  -3  -2    3.33    0.99 
   8  -3  -2    3.97    1.09 
  -8   3   2    3.29    1.13 
  -8   3   2    4.38    1.19 
   7  -3  -2   31.17    2.31 
   7  -3  -2   37.69    2.55 
   7  -3  -2   31.76    2.44 
  -7   3   2   37.67    2.13 
  -7   3   2   32.83    2.43 
  -7   3   2   32.57    2.53 
   6  -3  -2   14.76    1.75 
   6  -3  -2   16.03    1.88 
   6  -3  -2   17.16    1.81 
   6  -3  -2   18.24    0.96 
  -6   3   2   18.97    1.31 
  -6   3   2   16.29    1.82 
  -6   3   2   18.91    2.01 
   5  -3  -2   40.79    2.32 
   5  -3  -2   39.00    2.38 
   5  -3  -2   36.91    2.38 
   5  -3  -2   40.63    1.69 
   5  -3  -2   40.70    1.68 
  -5   3   2   41.04    1.96 
  -5   3   2   35.81    2.33 
  -5   3   2   42.09    1.66 
  -5   3   2   39.74    2.39 
   4  -3  -2   43.51    2.46 
   4  -3  -2   44.79    2.38 
   4  -3  -2   47.04    1.87 
   4  -3  -2   43.69    2.47 
  -4   3   2   47.24    2.00 
  -4   3   2   49.19    1.86 
  -4   3   2   46.94    2.47 
  -4   3   2   46.51    2.46 
   3  -3  -2   23.42    1.10 
   3  -3  -2   23.67    1.45 
   3  -3  -2   21.04    1.47 
   3  -3  -2   23.10    1.05 
   3  -3  -2   21.17    1.45 
  -3   3   2   24.34    1.09 
  -3   3   2   24.82    1.08 
  -3   3   2   24.39    1.44 
  -3   3   2   19.89    1.42 
   2  -3  -2   71.42    3.18 
   2  -3  -2   75.68    3.22 
   2  -3  -2   78.24    3.18 
   2  -3  -2   78.31    2.64 
   2  -3  -2   76.33    2.84 
  -2   3   2   76.30    2.65 
  -2   3   2   78.23    2.66 
  -2   3   2   75.70    3.14 
  -2   3   2   74.46    3.02 
  -2   3   2   77.63    3.18 
   1  -3  -2   70.81    2.68 
   1  -3  -2   66.39    2.85 
   1  -3  -2   68.02    2.47 
   1  -3  -2   73.27    2.92 
   1  -3  -2   74.83    2.64 
   1  -3  -2   67.59    2.83 
  -1   3   2   67.26    2.80 
  -1   3   2   69.22    2.47 
  -1   3   2   71.81    2.64 
  -1   3   2   67.13    2.74 
  -1   3   2   69.24    2.67 
  -1   3   2   70.43    2.60 
   0  -3  -2    9.22    0.63 
   0  -3  -2    9.96    0.91 
   0  -3  -2    8.50    0.82 
   0  -3  -2    8.44    0.52 
   0  -3  -2   10.14    0.63 
   0  -3  -2    9.04    0.85 
   0  -3  -2    9.21    0.71 
   0   3   2    8.88    0.59 
   0   3   2    9.42    0.71 
   0   3   2    9.26    0.62 
   0   3   2    8.06    0.59 
   0   3   2   10.03    0.57 
   0   3   2    9.34    0.84 
  -1  -3  -2  130.28    4.83 
  -1  -3  -2  129.31    4.55 
  -1  -3  -2  140.93    4.80 
  -1  -3  -2  131.66    4.79 
  -1  -3  -2  130.70    4.82 
   1   3   2  129.62    4.36 
   1   3   2  127.00    4.62 
   1   3   2  130.25    4.34 
   1   3   2  133.31    4.55 
   1   3   2  125.24    4.71 
   1   3   2  136.13    4.77 
  -2  -3  -2   45.84    2.14 
  -2  -3  -2   49.00    2.02 
  -2  -3  -2   43.54    2.16 
  -2  -3  -2   46.42    2.13 
  -2  -3  -2   47.10    2.01 
   2   3   2   41.65    2.01 
   2   3   2   43.71    1.86 
   2   3   2   42.06    2.02 
  -3  -3  -2  327.08   10.50 
  -3  -3  -2  324.22   10.50 
  -3  -3  -2  309.14   11.09 
  -3  -3  -2  320.04   11.20 
  -3  -3  -2  313.99   11.33 
   3   3   2  326.39   10.84 
   3   3   2  332.58   11.18 
   3   3   2  331.94   10.48 
   3   3   2  320.84   11.18 
  -4  -3  -2   86.75    3.21 
  -4  -3  -2   92.14    3.81 
  -4  -3  -2   85.11    3.19 
  -4  -3  -2   85.93    3.79 
  -4  -3  -2   87.79    3.96 
   4   3   2   88.93    3.83 
   4   3   2   88.31    3.18 
   4   3   2   85.44    3.73 
   4   3   2   91.63    3.46 
  -5  -3  -2   -0.66    0.29 
  -5  -3  -2    0.60    0.38 
  -5  -3  -2   -0.06    0.18 
  -5  -3  -2   -0.41    0.28 
   5   3   2    0.01    0.33 
   5   3   2    0.04    0.22 
   5   3   2   -0.13    0.22 
  -6  -3  -2   23.15    2.18 
  -6  -3  -2   18.78    1.77 
  -6  -3  -2   19.59    1.29 
  -6  -3  -2   21.25    2.20 
   6   3   2   20.89    1.40 
   6   3   2   22.52    2.14 
   6   3   2   20.33    1.95 
   6   3   2   23.24    1.57 
  -7  -3  -2    0.42    0.58 
  -7  -3  -2    0.22    0.40 
  -7  -3  -2    0.04    0.38 
  -7  -3  -2    0.03    0.39 
   7   3   2    0.50    0.57 
   7   3   2    0.13    0.36 
   7   3   2    0.54    0.44 
   7   3   2    0.56    0.48 
  -8  -3  -2    8.16    1.58 
  -8  -3  -2    5.22    1.27 
  -8  -3  -2    5.43    1.03 
  -8  -3  -2    7.09    1.10 
   8   3   2    7.30    1.17 
   8   3   2    6.63    1.27 
   8   3   2    7.44    1.12 
   8   3   2    5.84    1.30 
  -9  -3  -2    7.51    1.57 
  -9  -3  -2    8.90    1.75 
   9   3   2    3.44    1.09 
   9   3   2    3.69    1.15 
 -10  -3  -2    3.11    1.13 
 -10  -3  -2    4.70    1.38 
  10   3   2    5.15    1.53 
  10   3   2    2.24    0.96 
 -11  -3  -2    4.15    1.51 
 -11  -3  -2    6.44    1.70 
  11   3   2    4.12    1.29 
  11   3   2    8.60    1.94 
 -12  -3  -2    4.55    1.57 
 -12  -3  -2    2.35    1.40 
  12   3   2    3.27    1.51 
  12   3   2    1.74    1.09 
  11  -4  -2    9.77    2.11 
  11  -4  -2    8.23    1.84 
  11  -4  -2    4.87    1.52 
 -11   4   2    5.90    1.63 
 -11   4   2    8.37    1.95 
 -11   4   2   11.56    2.95 
  10  -4  -2    4.64    1.34 
  10  -4  -2    6.13    1.71 
  10  -4  -2    8.08    1.70 
 -10   4   2    5.49    1.54 
 -10   4   2    6.99    1.52 
 -10   4   2    7.86    1.70 
   9  -4  -2    1.86    0.90 
   9  -4  -2    1.73    0.90 
   9  -4  -2    2.12    0.96 
  -9   4   2    0.91    0.78 
  -9   4   2    1.54    0.87 
   8  -4  -2   17.83    2.26 
   8  -4  -2   16.56    2.08 
   8  -4  -2   17.15    2.29 
  -8   4   2   20.53    2.40 
  -8   4   2   14.52    2.13 
   7  -4  -2    0.02    0.53 
   7  -4  -2    0.17    0.45 
   7  -4  -2    0.23    0.51 
  -7   4   2    0.09    0.50 
  -7   4   2    0.17    0.49 
  -7   4   2    1.02    0.49 
   6  -4  -2   25.11    1.96 
   6  -4  -2   28.97    2.22 
   6  -4  -2   29.56    2.22 
  -6   4   2   34.03    1.78 
  -6   4   2   28.99    2.18 
  -6   4   2   29.29    2.18 
   5  -4  -2   11.44    1.39 
   5  -4  -2   12.59    0.69 
   5  -4  -2   12.57    1.58 
   5  -4  -2   12.72    1.58 
   5  -4  -2   14.07    0.70 
  -5   4   2   11.41    1.44 
  -5   4   2   13.36    0.97 
  -5   4   2   13.63    1.59 
  -5   4   2   13.35    0.67 
   4  -4  -2   22.01    1.01 
   4  -4  -2   19.38    1.45 
   4  -4  -2   19.53    1.83 
   4  -4  -2   18.41    1.80 
  -4   4   2   21.95    1.58 
  -4   4   2   22.90    1.57 
  -4   4   2   20.93    0.98 
  -4   4   2   19.28    1.10 
   3  -4  -2   39.44    1.56 
   3  -4  -2   34.92    2.09 
   3  -4  -2   32.91    1.94 
   3  -4  -2   34.99    2.05 
   3  -4  -2   38.10    1.58 
  -3   4   2   36.82    2.03 
  -3   4   2   36.50    1.55 
  -3   4   2   37.29    1.56 
  -3   4   2   37.53    1.56 
  -3   4   2   35.72    1.94 
   2  -4  -2   63.75    2.99 
   2  -4  -2   68.47    3.04 
   2  -4  -2   62.85    2.88 
   2  -4  -2   70.82    2.65 
  -2   4   2   67.75    2.79 
  -2   4   2   67.55    2.47 
  -2   4   2   68.85    2.50 
  -2   4   2   66.81    2.93 
   1  -4  -2  111.71    4.05 
   1  -4  -2  113.52    4.43 
   1  -4  -2  116.75    4.34 
   1  -4  -2  106.94    4.34 
   1  -4  -2  112.40    4.20 
   1  -4  -2  114.21    4.44 
  -1   4   2  115.37    4.05 
  -1   4   2  120.33    4.15 
  -1   4   2  113.04    4.35 
  -1   4   2  112.85    4.26 
   0  -4  -2  117.25    4.47 
   0  -4  -2  119.51    4.22 
   0  -4  -2  112.79    4.42 
   0  -4  -2  114.23    4.14 
   0  -4  -2  114.49    4.27 
   0  -4  -2  118.99    4.40 
   0  -4  -2  115.71    4.39 
   0   4   2  117.65    4.33 
   0   4   2  115.49    4.17 
   0   4   2  117.34    4.16 
   0   4   2  113.74    4.37 
  -1  -4  -2   12.40    0.67 
  -1  -4  -2   10.57    1.04 
  -1  -4  -2   11.69    1.11 
  -1  -4  -2   11.53    0.79 
  -1  -4  -2   11.85    0.94 
   1   4   2   12.53    0.67 
   1   4   2   10.90    0.84 
   1   4   2   13.16    0.92 
   1   4   2   13.23    0.82 
   1   4   2   12.37    0.65 
  -2  -4  -2  223.30    8.50 
  -2  -4  -2  246.29    8.54 
  -2  -4  -2  235.73    8.48 
  -2  -4  -2  240.83    7.72 
  -2  -4  -2  230.62    8.25 
   2   4   2  243.01    8.09 
   2   4   2  247.17    7.72 
   2   4   2  230.90    8.37 
   2   4   2  239.04    8.36 
  -3  -4  -2   30.63    1.14 
  -3  -4  -2   30.32    1.86 
  -3  -4  -2   29.25    1.79 
  -3  -4  -2   31.79    1.76 
   3   4   2   30.33    1.74 
   3   4   2   30.28    1.44 
   3   4   2   30.66    1.73 
   3   4   2   31.45    1.13 
  -4  -4  -2   52.53    2.01 
  -4  -4  -2   53.89    2.70 
  -4  -4  -2   49.96    2.78 
  -4  -4  -2   52.72    2.01 
  -4  -4  -2   53.23    2.72 
   4   4   2   54.61    2.27 
   4   4   2   49.75    2.63 
   4   4   2   54.84    2.00 
   4   4   2   50.86    2.64 
  -5  -4  -2   41.40    2.65 
  -5  -4  -2   50.69    2.72 
  -5  -4  -2   48.39    2.62 
  -5  -4  -2   45.43    1.96 
   5   4   2   46.78    2.58 
   5   4   2   50.37    2.68 
   5   4   2   45.54    2.13 
  -6  -4  -2   16.79    1.14 
  -6  -4  -2   18.86    2.12 
  -6  -4  -2   21.31    1.97 
  -6  -4  -2   20.75    2.12 
   6   4   2   18.91    1.95 
   6   4   2   20.15    1.31 
   6   4   2   17.84    1.76 
   6   4   2   22.75    2.17 
  -7  -4  -2   -0.06    0.31 
  -7  -4  -2    0.30    0.45 
  -7  -4  -2   -0.35    0.24 
  -7  -4  -2    0.00    0.56 
   7   4   2    0.11    0.36 
   7   4   2    0.08    0.39 
   7   4   2    0.27    0.49 
   7   4   2   -0.32    0.35 
  -8  -4  -2   -0.09    0.44 
  -8  -4  -2   -0.57    0.52 
  -8  -4  -2   -0.06    0.51 
   8   4   2   -0.16    0.41 
   8   4   2    0.25    0.51 
   8   4   2    0.49    0.60 
  -9  -4  -2    8.54    1.74 
  -9  -4  -2    5.58    1.23 
  -9  -4  -2    6.87    1.59 
   9   4   2    4.27    1.22 
   9   4   2    5.40    1.30 
   9   4   2    4.16    1.04 
 -10  -4  -2    9.60    1.98 
 -10  -4  -2    8.25    1.95 
  10   4   2    7.26    1.59 
  10   4   2   10.77    1.97 
 -11  -4  -2    2.10    1.17 
 -11  -4  -2    0.08    0.96 
  11   4   2    0.93    0.91 
  11   4   2    1.93    1.01 
  11  -5  -2    1.99    1.61 
  11  -5  -2    0.77    1.11 
  11  -5  -2    2.88    1.23 
 -11   5   2    2.21    1.23 
 -11   5   2    2.28    1.17 
 -11   5   2    0.73    0.94 
  10  -5  -2    9.25    1.90 
  10  -5  -2    7.12    1.53 
  10  -5  -2    6.70    1.70 
 -10   5   2    7.88    1.62 
 -10   5   2    4.40    1.45 
 -10   5   2    5.19    1.54 
   9  -5  -2    8.47    1.81 
   9  -5  -2    9.35    1.82 
   9  -5  -2    5.94    1.30 
  -9   5   2    6.37    1.66 
  -9   5   2    7.09    1.58 
   8  -5  -2    0.21    0.44 
   8  -5  -2   -0.12    0.54 
   8  -5  -2   -0.42    0.64 
  -8   5   2   -0.36    0.54 
  -8   5   2    0.13    0.45 
   7  -5  -2   14.96    2.04 
   7  -5  -2   13.41    1.87 
   7  -5  -2   12.89    1.66 
  -7   5   2   12.62    1.78 
  -7   5   2   11.65    1.80 
   6  -5  -2   31.41    2.19 
   6  -5  -2   31.87    2.43 
   6  -5  -2   31.62    2.38 
  -6   5   2   33.05    1.80 
  -6   5   2   31.78    2.35 
  -6   5   2   35.96    2.43 
   5  -5  -2    3.94    0.35 
   5  -5  -2    3.46    0.81 
   5  -5  -2    4.39    0.99 
   5  -5  -2    3.34    0.86 
  -5   5   2    3.98    0.30 
  -5   5   2    5.76    1.10 
  -5   5   2    3.45    0.58 
  -5   5   2    3.62    0.87 
   4  -5  -2   72.38    3.57 
   4  -5  -2   80.35    3.89 
   4  -5  -2   78.86    2.89 
   4  -5  -2   79.51    3.83 
  -4   5   2   81.04    3.66 
  -4   5   2   76.19    3.69 
  -4   5   2   81.86    2.89 
  -4   5   2   77.63    3.07 
   3  -5  -2    9.23    1.13 
   3  -5  -2    9.27    0.69 
   3  -5  -2   12.18    1.40 
   3  -5  -2   10.06    1.26 
  -3   5   2    9.73    1.19 
  -3   5   2    9.66    1.11 
  -3   5   2   11.61    0.74 
   2  -5  -2   39.99    2.09 
   2  -5  -2   37.38    2.13 
   2  -5  -2   38.77    1.78 
   2  -5  -2   39.34    2.10 
   2  -5  -2   36.92    2.12 
  -2   5   2   39.71    1.92 
  -2   5   2   39.60    1.68 
  -2   5   2   38.36    1.82 
  -2   5   2   36.16    1.98 
   1  -5  -2   89.49    3.73 
   1  -5  -2   90.74    3.64 
   1  -5  -2   92.42    3.71 
   1  -5  -2   85.18    3.73 
   1  -5  -2   85.52    3.46 
   1  -5  -2   88.04    3.51 
   1  -5  -2   88.82    3.41 
  -1   5   2   86.35    3.62 
  -1   5   2   93.08    3.59 
  -1   5   2   87.99    3.44 
   0  -5  -2    0.98    0.35 
   0  -5  -2    1.20    0.39 
   0  -5  -2    0.63    0.33 
   0  -5  -2    0.83    0.33 
   0  -5  -2    0.92    0.30 
   0  -5  -2    1.16    0.39 
   0  -5  -2    0.89    0.33 
   0   5   2    1.15    0.35 
   0   5   2    0.43    0.26 
   0   5   2    0.30    0.24 
  -1  -5  -2   59.39    2.83 
  -1  -5  -2   60.82    2.84 
  -1  -5  -2   61.24    2.85 
  -1  -5  -2   63.73    2.47 
  -1  -5  -2   62.81    2.63 
  -1  -5  -2   65.52    2.88 
   1   5   2   64.72    2.47 
   1   5   2   63.41    2.62 
   1   5   2   65.75    2.44 
   1   5   2   64.06    2.79 
   1   5   2   62.04    2.76 
  -2  -5  -2    0.47    0.39 
  -2  -5  -2    0.16    0.26 
  -2  -5  -2   -0.08    0.25 
  -2  -5  -2    0.76    0.42 
  -2  -5  -2   -0.10    0.11 
   2   5   2    0.39    0.17 
   2   5   2   -0.06    0.24 
   2   5   2   -0.17    0.16 
   2   5   2   -0.04    0.19 
  -3  -5  -2  216.65    8.13 
  -3  -5  -2  208.56    8.01 
  -3  -5  -2  218.23    7.84 
  -3  -5  -2  211.20    7.02 
   3   5   2  202.64    7.77 
   3   5   2  221.63    7.03 
   3   5   2  218.20    7.91 
   3   5   2  214.11    7.37 
  -4  -5  -2   68.99    3.43 
  -4  -5  -2   73.34    2.60 
  -4  -5  -2   73.30    3.65 
  -4  -5  -2   75.40    3.45 
   4   5   2   72.52    2.85 
   4   5   2   64.58    3.25 
   4   5   2   68.76    3.37 
   4   5   2   74.20    2.57 
  -5  -5  -2    4.55    1.02 
  -5  -5  -2    4.87    0.98 
  -5  -5  -2    4.08    0.92 
  -5  -5  -2    4.76    0.53 
   5   5   2    4.21    0.90 
   5   5   2    5.22    0.98 
   5   5   2    4.58    0.62 
  -6  -5  -2   45.04    2.77 
  -6  -5  -2   46.03    2.07 
  -6  -5  -2   45.52    2.88 
  -6  -5  -2   45.87    3.01 
   6   5   2   48.48    2.23 
   6   5   2   47.87    2.85 
   6   5   2   49.46    2.87 
   6   5   2   49.41    2.75 
  -7  -5  -2   -0.33    0.51 
  -7  -5  -2    0.80    0.61 
  -7  -5  -2    0.98    0.64 
   7   5   2    0.23    0.40 
   7   5   2    0.49    0.38 
   7   5   2   -0.01    0.46 
   7   5   2    0.54    0.56 
  -8  -5  -2    4.46    1.28 
  -8  -5  -2    3.97    1.04 
  -8  -5  -2    1.54    0.84 
   8   5   2    2.48    0.90 
   8   5   2    4.24    1.09 
   8   5   2    4.06    1.00 
  -9  -5  -2    8.70    1.86 
  -9  -5  -2    7.28    1.70 
  -9  -5  -2    9.77    1.59 
   9   5   2    6.25    1.42 
   9   5   2    5.83    1.21 
   9   5   2    6.32    1.44 
 -10  -5  -2   -0.05    0.77 
 -10  -5  -2    0.25    0.61 
  10   5   2    0.31    0.76 
  10   5   2    0.14    0.56 
 -11  -5  -2    6.82    1.98 
 -11  -5  -2    8.34    2.00 
  11   5   2    6.22    1.63 
  11   5   2    9.95    1.98 
  11  -6  -2    6.17    1.78 
  11  -6  -2    7.09    1.80 
 -11   6   2    9.31    1.96 
 -11   6   2    8.12    1.99 
 -11   6   2    4.52    1.49 
  10  -6  -2   14.85    2.39 
  10  -6  -2   12.47    2.35 
  10  -6  -2   13.90    2.12 
 -10   6   2   12.34    2.18 
 -10   6   2   12.30    2.10 
 -10   6   2    9.51    2.14 
   9  -6  -2    1.25    1.02 
   9  -6  -2   -0.55    0.51 
   9  -6  -2   -0.79    0.59 
  -9   6   2   -0.25    0.75 
  -9   6   2    1.67    1.03 
   8  -6  -2    2.10    0.98 
   8  -6  -2    0.28    0.51 
   8  -6  -2    0.68    0.62 
  -8   6   2    2.59    0.98 
  -8   6   2    0.88    0.71 
   7  -6  -2    0.51    0.71 
   7  -6  -2    2.70    0.84 
   7  -6  -2    1.68    0.86 
  -7   6   2    2.13    0.94 
  -7   6   2    1.75    0.88 
   6  -6  -2    1.35    0.66 
   6  -6  -2    2.23    0.81 
   6  -6  -2    1.03    0.66 
  -6   6   2    0.22    0.58 
  -6   6   2    3.33    0.90 
  -6   6   2    2.44    0.54 
   5  -6  -2    5.62    0.37 
   5  -6  -2    7.16    1.34 
   5  -6  -2    5.78    1.17 
   5  -6  -2    6.33    1.09 
  -5   6   2    7.49    1.22 
  -5   6   2    6.16    1.13 
  -5   6   2    6.17    0.78 
   4  -6  -2   31.53    2.20 
   4  -6  -2   30.34    1.42 
   4  -6  -2   30.51    2.00 
   4  -6  -2   33.68    2.30 
  -4   6   2   31.05    2.11 
  -4   6   2   35.68    1.57 
  -4   6   2   29.41    1.95 
  -4   6   2   32.87    1.62 
   3  -6  -2  112.08    4.06 
   3  -6  -2  104.68    4.57 
   3  -6  -2  115.40    4.86 
   3  -6  -2  108.19    4.78 
  -3   6   2  111.56    4.08 
  -3   6   2  104.64    4.45 
  -3   6   2  101.75    4.57 
   2  -6  -2    2.46    0.67 
   2  -6  -2    3.80    0.59 
   2  -6  -2    2.56    0.49 
   2  -6  -2    3.71    0.78 
   2  -6  -2    1.96    0.56 
   2  -6  -2    2.31    0.68 
  -2   6   2    3.16    0.69 
  -2   6   2    2.83    0.49 
  -2   6   2    1.33    0.42 
   1  -6  -2    2.97    0.63 
   1  -6  -2    4.76    0.71 
   1  -6  -2    3.04    0.65 
   1  -6  -2    4.83    0.83 
   1  -6  -2    4.63    0.67 
   1  -6  -2    2.49    0.64 
   1  -6  -2    4.13    0.69 
  -1   6   2    5.51    0.79 
  -1   6   2    5.36    0.80 
  -1   6   2    4.78    0.68 
   0  -6  -2  123.43    4.71 
   0  -6  -2  127.03    4.92 
   0  -6  -2  121.11    4.96 
   0  -6  -2  125.47    4.84 
   0  -6  -2  125.01    4.90 
   0  -6  -2  119.12    4.92 
   0  -6  -2  122.13    4.70 
   0   6   2  126.23    4.87 
   0   6   2  130.60    4.84 
   0   6   2  121.60    4.63 
  -1  -6  -2    0.21    0.30 
  -1  -6  -2    0.61    0.36 
  -1  -6  -2    0.25    0.29 
  -1  -6  -2    0.67    0.43 
  -1  -6  -2    0.56    0.35 
  -1  -6  -2    0.38    0.26 
   1   6   2    0.31    0.26 
   1   6   2    0.57    0.25 
   1   6   2    0.80    0.36 
   1   6   2    0.28    0.28 
  -2  -6  -2    0.83    0.46 
  -2  -6  -2    0.23    0.38 
  -2  -6  -2    1.29    0.29 
  -2  -6  -2    1.26    0.48 
  -2  -6  -2    0.58    0.36 
   2   6   2    0.82    0.27 
   2   6   2    0.66    0.38 
   2   6   2    0.73    0.31 
   2   6   2    0.66    0.37 
  -3  -6  -2   19.75    1.88 
  -3  -6  -2   21.30    0.95 
  -3  -6  -2   20.13    1.92 
  -3  -6  -2   19.56    1.45 
   3   6   2   16.88    1.30 
   3   6   2   18.74    1.45 
   3   6   2   19.84    1.13 
   3   6   2   21.28    0.95 
  -4  -6  -2   16.43    0.78 
  -4  -6  -2   15.61    1.61 
  -4  -6  -2   13.06    1.66 
  -4  -6  -2   15.19    1.70 
   4   6   2   15.77    0.95 
   4   6   2   14.70    0.75 
   4   6   2   13.97    1.50 
   4   6   2   12.59    1.47 
  -5  -6  -2   31.48    1.40 
  -5  -6  -2   31.60    2.23 
  -5  -6  -2   31.61    2.18 
  -5  -6  -2   29.14    2.29 
   5   6   2   26.25    2.02 
   5   6   2   32.78    2.14 
   5   6   2   34.67    1.59 
   5   6   2   32.65    1.38 
  -6  -6  -2    3.18    0.95 
  -6  -6  -2    2.93    0.49 
  -6  -6  -2    2.54    0.82 
  -6  -6  -2    1.91    0.76 
   6   6   2    2.82    0.81 
   6   6   2    1.98    0.79 
   6   6   2    2.21    0.75 
   6   6   2    2.70    0.51 
  -7  -6  -2   35.57    2.72 
  -7  -6  -2   42.51    3.11 
  -7  -6  -2   43.47    2.86 
   7   6   2   42.50    2.71 
   7   6   2   43.87    2.82 
   7   6   2   36.74    2.71 
  -8  -6  -2    2.35    0.94 
  -8  -6  -2    3.04    1.22 
  -8  -6  -2    2.64    1.10 
   8   6   2    3.28    0.93 
   8   6   2    3.54    1.07 
   8   6   2    3.09    1.03 
  -9  -6  -2    1.45    0.88 
  -9  -6  -2    2.67    1.08 
  -9  -6  -2    1.59    0.98 
   9   6   2    0.30    0.64 
   9   6   2    1.44    0.90 
   9   6   2    0.82    0.77 
 -10  -6  -2    5.24    1.61 
 -10  -6  -2    3.52    1.43 
  10   6   2    4.74    1.39 
  10   6   2    2.55    1.15 
 -11  -6  -2    1.50    1.14 
 -11  -6  -2   -0.14    0.94 
  11   6   2    1.03    0.74 
  11   6   2    0.76    0.81 
  11  -7  -2    8.29    2.03 
 -11   7   2    8.10    1.94 
 -11   7   2   10.32    2.16 
 -11   7   2    6.86    1.71 
  10  -7  -2    2.35    1.19 
  10  -7  -2    5.65    1.79 
 -10   7   2    2.17    1.31 
 -10   7   2    2.95    1.11 
 -10   7   2    1.67    1.14 
   9  -7  -2   32.59    3.53 
   9  -7  -2   28.57    2.93 
   9  -7  -2   31.03    3.53 
  -9   7   2   28.37    3.22 
  -9   7   2   23.75    3.03 
   8  -7  -2    2.61    1.09 
   8  -7  -2    2.98    1.00 
   8  -7  -2    1.81    0.86 
  -8   7   2    0.88    0.84 
  -8   7   2    2.09    1.05 
   7  -7  -2    0.71    0.73 
   7  -7  -2    0.96    0.79 
   7  -7  -2    0.48    0.54 
  -7   7   2    0.17    0.57 
  -7   7   2   -0.04    0.47 
   6  -7  -2    0.53    0.55 
   6  -7  -2    0.17    0.63 
   6  -7  -2   -0.19    0.46 
  -6   7   2    0.75    0.63 
  -6   7   2   -0.61    0.45 
   5  -7  -2    0.11    0.35 
   5  -7  -2   -0.14    0.32 
   5  -7  -2   -0.48    0.39 
  -5   7   2    0.42    0.50 
  -5   7   2    0.03    0.42 
  -5   7   2    0.36    0.31 
   4  -7  -2   12.47    0.84 
   4  -7  -2   10.84    1.55 
   4  -7  -2   12.50    1.51 
   4  -7  -2   15.73    1.84 
  -4   7   2   12.29    0.94 
  -4   7   2   13.17    1.54 
  -4   7   2    9.51    1.38 
   3  -7  -2    1.63    0.67 
   3  -7  -2    2.38    0.78 
   3  -7  -2    4.32    0.63 
   3  -7  -2    2.46    0.68 
   3  -7  -2    2.87    0.77 
  -3   7   2    3.03    0.70 
  -3   7   2    2.69    0.74 
  -3   7   2    3.87    0.61 
   2  -7  -2  179.34    7.28 
   2  -7  -2  181.22    7.21 
   2  -7  -2  187.47    6.83 
   2  -7  -2  181.31    7.33 
   2  -7  -2  189.57    6.83 
   2  -7  -2  183.49    7.16 
  -2   7   2  188.40    7.16 
  -2   7   2  197.56    7.05 
  -2   7   2  198.05    6.79 
  -2   7   2  184.76    7.24 
   1  -7  -2  101.11    4.55 
   1  -7  -2  108.58    4.41 
   1  -7  -2  115.34    4.64 
   1  -7  -2  107.07    4.50 
   1  -7  -2  107.34    4.35 
   1  -7  -2  109.55    4.41 
   1  -7  -2  109.49    4.68 
  -1   7   2  114.83    4.38 
  -1   7   2  105.56    4.26 
  -1   7   2  111.11    4.45 
  -1   7   2  106.65    4.50 
   0  -7  -2   26.50    1.73 
   0  -7  -2   26.03    1.61 
   0  -7  -2   29.08    1.83 
   0  -7  -2   29.11    1.77 
   0  -7  -2   28.14    1.81 
   0  -7  -2   30.11    1.69 
   0  -7  -2   30.64    1.82 
   0   7   2   29.10    1.74 
   0   7   2   27.38    1.57 
   0   7   2   30.23    1.72 
  -1  -7  -2   14.23    1.35 
  -1  -7  -2   12.53    1.39 
  -1  -7  -2   13.57    1.31 
  -1  -7  -2   13.82    1.47 
  -1  -7  -2   15.44    1.57 
  -1  -7  -2   14.81    1.53 
  -1  -7  -2   12.27    0.95 
   1   7   2   13.96    1.39 
   1   7   2   13.86    1.24 
   1   7   2   13.90    0.95 
   1   7   2   13.56    1.39 
  -2  -7  -2   17.28    1.76 
  -2  -7  -2   20.51    1.42 
  -2  -7  -2   17.65    1.76 
  -2  -7  -2   19.41    1.85 
  -2  -7  -2   19.29    1.08 
   2   7   2   18.26    1.68 
   2   7   2   18.21    1.36 
   2   7   2   18.41    1.18 
  -3  -7  -2   10.59    1.42 
  -3  -7  -2   11.20    0.73 
  -3  -7  -2   10.08    1.43 
  -3  -7  -2   10.35    1.29 
   3   7   2   13.20    1.39 
   3   7   2   11.92    1.41 
   3   7   2   13.11    0.83 
   3   7   2   12.17    0.88 
  -4  -7  -2    4.33    1.02 
  -4  -7  -2    4.74    1.01 
  -4  -7  -2    5.13    0.97 
  -4  -7  -2    4.71    0.48 
   4   7   2    5.04    0.90 
   4   7   2    2.44    0.70 
   4   7   2    5.21    0.62 
   4   7   2    5.57    0.52 
  -5  -7  -2    3.30    0.97 
  -5  -7  -2    0.88    0.56 
  -5  -7  -2    0.81    0.56 
  -5  -7  -2    2.25    0.35 
   5   7   2    2.35    0.72 
   5   7   2    2.90    0.47 
   5   7   2    2.06    0.69 
   5   7   2    2.20    0.71 
  -6  -7  -2   24.63    2.47 
  -6  -7  -2   19.11    2.31 
  -6  -7  -2   21.51    2.27 
   6   7   2   20.02    2.14 
   6   7   2   20.07    2.07 
   6   7   2   22.99    2.32 
  -7  -7  -2    4.38    1.17 
  -7  -7  -2    3.56    1.06 
  -7  -7  -2    2.32    0.93 
   7   7   2    3.10    0.97 
   7   7   2    5.93    1.30 
   7   7   2    4.74    1.12 
  -8  -7  -2    8.52    1.72 
  -8  -7  -2   10.32    1.96 
  -8  -7  -2    8.56    1.61 
   8   7   2    9.11    1.64 
   8   7   2   10.75    1.78 
   8   7   2   12.58    1.81 
  -9  -7  -2   12.61    2.22 
  -9  -7  -2   13.57    2.35 
  -9  -7  -2   13.27    2.04 
   9   7   2   14.41    2.14 
   9   7   2   14.02    2.00 
   9   7   2   12.60    2.06 
 -10  -7  -2    0.30    0.93 
 -10  -7  -2    0.59    0.74 
 -10  -7  -2    0.16    0.77 
  10   7   2   -0.34    0.69 
  10   7   2    0.43    0.63 
  10   7   2   -0.03    0.50 
 -11  -7  -2    2.61    1.23 
 -11  -7  -2    2.58    1.36 
  11   7   2    2.76    1.26 
  11   7   2    2.49    1.27 
  10  -8  -2    5.55    1.74 
  10  -8  -2    1.08    1.08 
 -10   8   2    1.16    1.17 
 -10   8   2    4.53    1.51 
 -10   8   2    3.17    1.33 
   9  -8  -2    5.24    1.67 
   9  -8  -2    4.51    1.53 
   9  -8  -2    9.26    1.98 
  -9   8   2    3.63    1.38 
  -9   8   2    8.88    1.82 
   8  -8  -2   31.45    3.48 
   8  -8  -2   28.75    3.29 
   8  -8  -2   32.15    3.06 
  -8   8   2   38.30    3.58 
  -8   8   2   32.94    3.38 
   7  -8  -2   10.69    1.64 
   7  -8  -2    8.91    1.76 
   7  -8  -2   11.87    1.98 
  -7   8   2   12.66    1.92 
  -7   8   2   11.35    1.93 
   6  -8  -2   -0.44    0.47 
   6  -8  -2   -0.88    0.42 
   6  -8  -2   -0.40    0.48 
  -6   8   2   -0.01    0.55 
  -6   8   2   -0.34    0.43 
   5  -8  -2    8.04    1.51 
   5  -8  -2    6.47    1.25 
   5  -8  -2    9.62    1.60 
  -5   8   2    4.76    1.04 
  -5   8   2    7.94    0.97 
  -5   8   2    6.55    1.26 
   4  -8  -2    5.23    1.02 
   4  -8  -2    5.86    1.23 
   4  -8  -2    5.41    0.69 
   4  -8  -2    5.77    1.22 
  -4   8   2    4.61    0.74 
  -4   8   2    4.55    1.00 
  -4   8   2    4.45    0.94 
   3  -8  -2   51.46    2.96 
   3  -8  -2   44.17    2.85 
   3  -8  -2   49.50    3.00 
   3  -8  -2   56.59    2.92 
   3  -8  -2   51.75    2.42 
  -3   8   2   52.69    2.77 
  -3   8   2   54.94    2.49 
  -3   8   2   49.18    2.83 
   2  -8  -2   20.74    2.08 
   2  -8  -2   25.06    1.54 
   2  -8  -2   24.10    1.76 
   2  -8  -2   19.36    1.98 
   2  -8  -2   20.29    1.43 
   2  -8  -2   20.82    1.95 
  -2   8   2   20.95    1.53 
  -2   8   2   22.73    1.72 
  -2   8   2   22.78    1.43 
  -2   8   2   24.36    1.71 
   1  -8  -2   37.93    2.13 
   1  -8  -2   38.30    2.23 
   1  -8  -2   43.16    2.25 
   1  -8  -2   35.62    2.12 
   1  -8  -2   40.13    2.36 
   1  -8  -2   43.19    2.38 
   1  -8  -2   39.51    2.37 
  -1   8   2   36.00    2.19 
  -1   8   2   39.65    2.18 
  -1   8   2   38.60    2.10 
  -1   8   2   37.05    2.04 
   0  -8  -2  145.96    5.75 
   0  -8  -2  148.88    5.95 
   0  -8  -2  142.00    5.93 
   0  -8  -2  150.36    6.04 
   0  -8  -2  147.73    5.91 
   0  -8  -2  144.30    5.88 
   0  -8  -2  149.94    5.73 
   0   8   2  150.63    5.64 
   0   8   2  149.27    5.87 
   0   8   2  143.06    5.74 
  -1  -8  -2   31.09    1.70 
  -1  -8  -2   32.43    2.06 
  -1  -8  -2   31.00    2.02 
  -1  -8  -2   29.34    1.83 
  -1  -8  -2   29.25    1.81 
  -1  -8  -2   26.28    1.88 
  -1  -8  -2   27.13    1.91 
   1   8   2   29.26    1.75 
   1   8   2   32.08    1.65 
   1   8   2   30.94    1.90 
   1   8   2   27.48    1.84 
  -2  -8  -2   59.45    2.44 
  -2  -8  -2   56.53    3.08 
  -2  -8  -2   52.51    2.93 
  -2  -8  -2   51.22    2.93 
  -2  -8  -2   51.74    2.74 
   2   8   2   56.30    2.52 
   2   8   2   50.70    2.71 
   2   8   2   52.72    2.82 
  -3  -8  -2   19.95    1.13 
  -3  -8  -2   20.92    2.11 
  -3  -8  -2   18.52    2.05 
  -3  -8  -2   20.31    1.92 
   3   8   2   21.85    1.67 
   3   8   2   19.38    1.50 
   3   8   2   22.17    1.29 
  -4  -8  -2    7.00    1.19 
  -4  -8  -2    4.51    1.09 
  -4  -8  -2    8.09    1.34 
  -4  -8  -2    6.96    0.66 
   4   8   2    5.93    1.12 
   4   8   2    8.20    1.20 
   4   8   2    6.77    0.75 
  -5  -8  -2   18.60    2.26 
  -5  -8  -2   20.53    2.31 
  -5  -8  -2   19.26    2.09 
   5   8   2   17.12    1.89 
   5   8   2   20.12    2.09 
   5   8   2   18.41    1.07 
   5   8   2   18.31    2.03 
  -6  -8  -2    2.91    0.93 
  -6  -8  -2    0.89    0.72 
  -6  -8  -2    1.03    0.73 
   6   8   2    0.97    0.62 
   6   8   2    0.85    0.65 
   6   8   2    0.36    0.54 
  -7  -8  -2   36.40    3.35 
  -7  -8  -2   35.68    3.54 
  -7  -8  -2   36.30    2.74 
   7   8   2   31.63    3.03 
   7   8   2   33.77    2.55 
   7   8   2   31.64    2.46 
  -8  -8  -2   21.62    2.83 
  -8  -8  -2   22.16    2.64 
  -8  -8  -2   20.89    2.60 
   8   8   2   19.92    2.42 
   8   8   2   20.15    2.52 
   8   8   2   24.36    2.67 
  -9  -8  -2    1.86    0.98 
  -9  -8  -2    0.82    0.95 
  -9  -8  -2    0.57    0.86 
   9   8   2    0.75    0.67 
   9   8   2    0.46    0.77 
   9   8   2    2.69    1.12 
 -10  -8  -2   12.23    2.03 
 -10  -8  -2   12.87    2.53 
 -10  -8  -2   15.56    2.59 
  10   8   2   11.53    1.97 
  10   8   2   13.62    2.26 
 -11  -8  -2    2.90    1.42 
 -11  -8  -2    2.93    1.42 
  11   8   2    3.45    1.30 
  11   8   2    2.25    1.18 
  10  -9  -2   -0.23    0.98 
  10  -9  -2    1.67    1.20 
 -10   9   2   -0.19    0.91 
 -10   9   2    0.81    0.80 
 -10   9   2    1.79    1.11 
   9  -9  -2    5.74    1.76 
   9  -9  -2    6.59    1.85 
  -9   9   2    8.03    1.83 
  -9   9   2    9.23    1.92 
  -9   9   2    6.14    1.61 
   8  -9  -2   -0.27    0.53 
   8  -9  -2    0.08    0.83 
   8  -9  -2   -0.45    0.50 
  -8   9   2    0.24    0.62 
  -8   9   2   -0.34    0.54 
   7  -9  -2    6.67    1.57 
   7  -9  -2    8.41    1.82 
   7  -9  -2    7.83    1.45 
  -7   9   2    7.22    1.53 
  -7   9   2    8.33    1.67 
   6  -9  -2    8.62    1.67 
   6  -9  -2    8.01    1.62 
   6  -9  -2    9.31    1.51 
  -6   9   2    6.73    1.44 
  -6   9   2    6.16    1.44 
   5  -9  -2    0.22    0.51 
   5  -9  -2    1.74    0.76 
   5  -9  -2    1.15    0.66 
  -5   9   2    0.07    0.51 
  -5   9   2    1.61    0.76 
   4  -9  -2   22.22    2.45 
   4  -9  -2   23.15    1.42 
   4  -9  -2   22.19    2.20 
   4  -9  -2   28.56    2.72 
  -4   9   2   24.50    1.38 
  -4   9   2   21.09    2.26 
  -4   9   2   24.27    2.28 
  -4   9   2   22.13    1.50 
   3  -9  -2    4.34    1.02 
   3  -9  -2    3.41    0.66 
   3  -9  -2    5.19    1.11 
   3  -9  -2    3.43    0.95 
   3  -9  -2    4.15    0.94 
  -3   9   2    5.58    0.91 
  -3   9   2    3.92    0.93 
  -3   9   2    5.35    1.02 
  -3   9   2    4.26    0.98 
   2  -9  -2   70.64    3.62 
   2  -9  -2   63.29    3.19 
   2  -9  -2   72.80    3.36 
   2  -9  -2   81.12    3.71 
   2  -9  -2   67.23    3.69 
   2  -9  -2   66.83    3.68 
  -2   9   2   69.19    3.60 
  -2   9   2   77.51    3.52 
  -2   9   2   72.03    3.56 
  -2   9   2   74.58    3.29 
   1  -9  -2  141.48    5.68 
   1  -9  -2  138.02    5.87 
   1  -9  -2  143.05    5.77 
   1  -9  -2  150.27    5.90 
   1  -9  -2  137.17    5.66 
   1  -9  -2  135.53    5.61 
   1  -9  -2  134.18    5.88 
  -1   9   2  132.27    5.51 
  -1   9   2  141.48    5.55 
  -1   9   2  143.50    5.66 
  -1   9   2  128.23    5.65 
   0  -9  -2    0.98    0.53 
   0  -9  -2    0.71    0.44 
   0  -9  -2    2.04    0.68 
   0  -9  -2    1.15    0.52 
   0  -9  -2    1.43    0.65 
   0  -9  -2    2.84    0.72 
   0  -9  -2    2.53    0.73 
   0   9   2    2.67    0.67 
   0   9   2    1.47    0.53 
   0   9   2    2.15    0.66 
   0   9   2    1.29    0.52 
  -1  -9  -2   35.80    2.20 
  -1  -9  -2   42.34    2.53 
  -1  -9  -2   36.23    2.37 
  -1  -9  -2   38.68    2.43 
  -1  -9  -2   39.48    2.44 
  -1  -9  -2   41.63    2.27 
  -1  -9  -2   41.53    2.13 
   1   9   2   34.14    2.19 
   1   9   2   37.66    2.12 
   1   9   2   37.61    2.00 
   1   9   2   36.30    2.26 
  -2  -9  -2    1.05    0.40 
  -2  -9  -2    1.30    0.61 
  -2  -9  -2    0.33    0.46 
  -2  -9  -2    0.58    0.46 
  -2  -9  -2    0.95    0.61 
   2   9   2    0.41    0.34 
   2   9   2    1.13    0.38 
   2   9   2    0.55    0.48 
   2   9   2    1.70    0.60 
  -3  -9  -2   24.74    1.88 
  -3  -9  -2   28.66    2.64 
  -3  -9  -2   25.73    1.41 
  -3  -9  -2   25.95    2.49 
   3   9   2   25.25    1.82 
   3   9   2   24.26    1.47 
   3   9   2   24.46    2.28 
  -4  -9  -2   13.67    1.87 
  -4  -9  -2   16.46    1.91 
  -4  -9  -2   17.18    1.03 
  -4  -9  -2   16.17    2.07 
   4   9   2   16.15    1.81 
   4   9   2   17.89    1.98 
   4   9   2   17.86    2.03 
   4   9   2   16.86    1.10 
  -5  -9  -2    0.08    0.54 
  -5  -9  -2    0.65    0.56 
  -5  -9  -2   -0.50    0.44 
   5   9   2    0.28    0.48 
   5   9   2    0.07    0.41 
   5   9   2    0.47    0.44 
  -6  -9  -2   31.25    3.04 
  -6  -9  -2   29.88    2.91 
  -6  -9  -2   28.08    3.01 
   6   9   2   23.65    2.41 
   6   9   2   25.62    2.62 
   6   9   2   22.77    2.50 
  -7  -9  -2    1.47    0.89 
  -7  -9  -2    0.94    0.89 
  -7  -9  -2    1.40    0.85 
   7   9   2    1.27    0.78 
   7   9   2    0.26    0.59 
   7   9   2    1.77    0.76 
  -8  -9  -2    8.90    1.82 
  -8  -9  -2    9.38    1.99 
  -8  -9  -2   10.79    1.97 
   8   9   2    8.61    1.63 
   8   9   2    7.10    1.54 
   8   9   2    9.15    1.76 
  -9  -9  -2   26.65    3.21 
  -9  -9  -2   28.40    3.21 
  -9  -9  -2   25.33    3.43 
   9   9   2   29.13    3.21 
   9   9   2   25.34    3.06 
   9   9   2   28.49    3.08 
 -10  -9  -2    4.88    1.41 
 -10  -9  -2    1.25    1.06 
 -10  -9  -2   -0.04    0.92 
  10   9   2    2.04    1.12 
  10   9   2    0.71    0.92 
  10   9   2    2.11    1.06 
   9 -10  -2    2.90    1.44 
   9 -10  -2    2.76    1.35 
  -9  10   2    2.75    1.24 
  -9  10   2    2.14    1.17 
  -9  10   2    3.00    1.37 
   8 -10  -2   19.12    2.88 
   8 -10  -2   16.41    2.56 
  -8  10   2   14.10    2.31 
  -8  10   2   13.66    2.30 
  -8  10   2   16.82    2.59 
   7 -10  -2    5.58    1.57 
   7 -10  -2    3.15    1.30 
   7 -10  -2    3.20    1.05 
  -7  10   2    6.26    1.51 
  -7  10   2    4.46    1.24 
   6 -10  -2    6.47    1.31 
   6 -10  -2    7.81    1.68 
   6 -10  -2    4.85    1.45 
  -6  10   2    5.76    1.32 
  -6  10   2    4.61    1.30 
   5 -10  -2    5.63    1.20 
   5 -10  -2    6.95    1.54 
   5 -10  -2    6.88    1.53 
  -5  10   2    6.07    1.30 
  -5  10   2    6.62    1.42 
   4 -10  -2   -0.07    0.39 
   4 -10  -2    0.53    0.51 
   4 -10  -2   -0.18    0.45 
  -4  10   2    0.27    0.47 
  -4  10   2   -0.08    0.39 
  -4  10   2    0.21    0.37 
  -4  10   2    0.62    0.49 
   3 -10  -2   16.98    2.08 
   3 -10  -2   18.96    2.11 
   3 -10  -2   17.78    1.98 
   3 -10  -2   16.51    2.12 
   3 -10  -2   15.26    1.56 
  -3  10   2   17.40    1.68 
  -3  10   2   18.86    2.06 
  -3  10   2   16.90    1.86 
  -3  10   2   17.73    2.07 
  -3  10   2   20.22    1.39 
   2 -10  -2   12.60    1.47 
   2 -10  -2   13.79    1.72 
   2 -10  -2   11.35    1.58 
   2 -10  -2   14.01    1.82 
   2 -10  -2   15.21    1.91 
   2 -10  -2   16.13    1.68 
  -2  10   2   16.16    1.86 
  -2  10   2   15.21    1.71 
  -2  10   2   12.82    1.64 
  -2  10   2   16.66    1.61 
   1 -10  -2   30.28    2.12 
   1 -10  -2   30.58    2.04 
   1 -10  -2   30.47    2.05 
   1 -10  -2   32.13    2.22 
   1 -10  -2   28.53    2.15 
   1 -10  -2   27.70    2.01 
   1 -10  -2   30.67    2.04 
  -1  10   2   31.20    1.97 
  -1  10   2   27.95    2.01 
  -1  10   2   27.57    1.93 
  -1  10   2   26.88    1.86 
   0 -10  -2   19.01    2.04 
   0 -10  -2   22.42    1.64 
   0 -10  -2   19.69    1.99 
   0 -10  -2   20.49    1.96 
   0 -10  -2   23.78    2.26 
   0 -10  -2   20.68    2.01 
   0 -10  -2   20.92    2.07 
   0  10   2   22.62    1.69 
   0  10   2   24.27    1.79 
   0  10   2   19.50    1.83 
   0  10   2   18.69    1.75 
   0  10   2   19.80    1.86 
  -1 -10  -2    0.76    0.58 
  -1 -10  -2    0.64    0.47 
  -1 -10  -2    0.49    0.38 
  -1 -10  -2    0.36    0.41 
  -1 -10  -2    0.49    0.53 
  -1 -10  -2    0.24    0.44 
  -1 -10  -2    0.55    0.44 
   1  10   2    1.28    0.53 
   1  10   2    0.77    0.43 
   1  10   2    1.22    0.50 
   1  10   2    0.28    0.46 
  -2 -10  -2   18.42    2.03 
  -2 -10  -2   17.89    2.10 
  -2 -10  -2   18.87    1.92 
  -2 -10  -2   16.75    1.27 
  -2 -10  -2   18.43    2.12 
   2  10   2   16.66    1.22 
   2  10   2   16.44    1.79 
   2  10   2   18.18    1.36 
   2  10   2   17.21    1.90 
  -3 -10  -2   29.43    2.16 
  -3 -10  -2   33.16    2.48 
  -3 -10  -2   28.72    1.64 
  -3 -10  -2   29.37    2.82 
   3  10   2   30.98    1.75 
   3  10   2   28.59    2.23 
   3  10   2   26.94    2.00 
   3  10   2   29.15    2.18 
  -4 -10  -2    2.25    0.96 
  -4 -10  -2    1.04    0.66 
  -4 -10  -2    0.39    0.62 
   4  10   2    1.08    0.41 
   4  10   2    0.76    0.62 
   4  10   2   -0.35    0.45 
   4  10   2    1.37    0.64 
  -5 -10  -2   22.06    2.63 
  -5 -10  -2   24.55    2.71 
  -5 -10  -2   21.80    2.39 
   5  10   2   20.90    2.40 
   5  10   2   24.95    2.36 
   5  10   2   26.21    2.62 
  -6 -10  -2    6.58    1.39 
  -6 -10  -2    8.98    1.77 
  -6 -10  -2    4.73    1.34 
   6  10   2    7.02    1.33 
   6  10   2    6.94    1.46 
   6  10   2    6.88    1.43 
  -7 -10  -2    6.82    1.52 
  -7 -10  -2    5.77    1.51 
  -7 -10  -2    7.52    1.62 
   7  10   2    4.96    1.31 
   7  10   2    5.14    1.23 
   7  10   2    7.04    1.46 
  -8 -10  -2    2.89    1.15 
  -8 -10  -2    5.87    1.65 
  -8 -10  -2    4.96    1.35 
   8  10   2    2.07    0.93 
   8  10   2    4.94    1.40 
   8  10   2    5.58    1.33 
  -9 -10  -2    3.29    1.29 
  -9 -10  -2    3.68    1.39 
  -9 -10  -2    2.74    1.21 
   9  10   2    2.33    1.07 
   9  10   2    1.80    1.03 
   9  10   2    2.20    1.16 
 -10 -10  -2    9.01    2.14 
 -10 -10  -2   12.36    2.27 
 -10 -10  -2    8.85    2.10 
  10  10   2    4.67    1.54 
  10  10   2    7.25    1.69 
  10  10   2    9.18    1.87 
   9 -11  -2   -0.13    0.93 
   9 -11  -2   -0.35    0.62 
  -9  11   2   -1.00    0.67 
  -9  11   2    0.32    0.87 
  -9  11   2    0.61    0.98 
   8 -11  -2    0.02    0.62 
   8 -11  -2   -0.67    0.81 
  -8  11   2    0.86    0.91 
  -8  11   2   -0.47    0.69 
  -8  11   2    0.03    0.70 
   7 -11  -2    9.52    2.10 
   7 -11  -2    9.54    2.08 
  -7  11   2    5.74    1.48 
  -7  11   2    5.72    1.50 
  -7  11   2    8.01    1.76 
   6 -11  -2   16.22    2.13 
   6 -11  -2   17.94    2.73 
   6 -11  -2   18.91    2.68 
  -6  11   2   18.25    2.54 
  -6  11   2   17.65    2.30 
  -6  11   2   18.51    2.51 
   5 -11  -2    0.95    0.87 
   5 -11  -2    2.85    1.09 
   5 -11  -2    4.59    1.16 
  -5  11   2    3.45    1.21 
  -5  11   2    1.67    0.80 
  -5  11   2    1.24    0.78 
   4 -11  -2    1.56    0.93 
   4 -11  -2    2.58    1.02 
   4 -11  -2    0.98    0.67 
   4 -11  -2    2.44    0.92 
  -4  11   2    2.30    0.69 
  -4  11   2    2.75    0.89 
  -4  11   2    1.56    0.71 
  -4  11   2    1.07    0.73 
   3 -11  -2    0.07    0.59 
   3 -11  -2   -0.11    0.45 
   3 -11  -2   -0.42    0.39 
   3 -11  -2   -0.45    0.30 
   3 -11  -2   -0.20    0.52 
  -3  11   2   -0.43    0.39 
  -3  11   2   -0.08    0.31 
  -3  11   2   -0.03    0.42 
  -3  11   2   -0.31    0.41 
  -3  11   2   -0.29    0.27 
   2 -11  -2    0.52    0.51 
   2 -11  -2    1.29    0.71 
   2 -11  -2    0.38    0.53 
   2 -11  -2    0.40    0.47 
   2 -11  -2    0.17    0.39 
   2 -11  -2    1.20    0.61 
  -2  11   2    0.59    0.45 
  -2  11   2    0.01    0.33 
  -2  11   2    0.04    0.34 
  -2  11   2    0.60    0.50 
  -2  11   2    0.46    0.47 
   1 -11  -2   14.25    1.71 
   1 -11  -2   11.88    1.60 
   1 -11  -2   13.35    1.66 
   1 -11  -2   11.99    1.67 
   1 -11  -2   12.24    1.56 
   1 -11  -2   13.93    1.77 
   1 -11  -2   10.42    1.49 
  -1  11   2   11.11    1.50 
  -1  11   2   14.01    1.62 
  -1  11   2   10.80    1.40 
  -1  11   2   11.45    1.47 
  -1  11   2   15.37    1.73 
   0 -11  -2    0.08    0.37 
   0 -11  -2   -0.43    0.36 
   0 -11  -2   -0.31    0.38 
   0 -11  -2   -0.52    0.31 
   0 -11  -2    0.02    0.33 
   0 -11  -2   -0.40    0.31 
   0 -11  -2   -0.15    0.40 
   0  11   2    0.06    0.30 
   0  11   2   -0.37    0.29 
   0  11   2    0.30    0.38 
   0  11   2    0.20    0.38 
   0  11   2    0.10    0.39 
  -1 -11  -2   10.72    1.58 
  -1 -11  -2    6.64    1.19 
  -1 -11  -2   11.21    1.44 
  -1 -11  -2    9.09    1.25 
  -1 -11  -2   12.47    1.78 
  -1 -11  -2    9.77    1.49 
  -1 -11  -2    9.30    1.51 
   1  11   2   12.12    1.36 
   1  11   2    9.87    1.43 
   1  11   2    8.64    1.34 
   1  11   2    9.91    1.47 
   1  11   2    9.86    1.31 
  -2 -11  -2    1.54    0.52 
  -2 -11  -2    0.38    0.58 
  -2 -11  -2    0.90    0.58 
  -2 -11  -2    0.58    0.55 
  -2 -11  -2   -0.11    0.51 
   2  11   2    0.07    0.43 
   2  11   2    0.68    0.43 
   2  11   2    0.86    0.47 
   2  11   2    1.12    0.54 
   2  11   2    1.02    0.55 
  -3 -11  -2    3.40    1.11 
  -3 -11  -2    4.95    1.13 
  -3 -11  -2    5.03    1.27 
  -3 -11  -2    4.15    0.74 
   3  11   2    5.19    0.88 
   3  11   2    5.82    1.23 
   3  11   2    4.66    1.05 
   3  11   2    5.21    1.17 
   3  11   2    5.03    0.79 
  -4 -11  -2   36.45    2.79 
  -4 -11  -2   35.71    2.61 
  -4 -11  -2   35.02    3.39 
   4  11   2   38.42    2.49 
   4  11   2   33.34    2.55 
   4  11   2   33.25    2.56 
  -5 -11  -2   15.58    2.24 
  -5 -11  -2   13.31    2.17 
  -5 -11  -2   12.34    1.92 
   5  11   2   12.68    1.70 
   5  11   2   18.17    2.29 
   5  11   2   12.70    1.90 
  -6 -11  -2   14.05    2.17 
  -6 -11  -2   17.41    2.32 
  -6 -11  -2   13.11    2.24 
   6  11   2   11.99    1.77 
   6  11   2   10.17    1.81 
   6  11   2   13.83    2.09 
  -7 -11  -2   -0.33    0.73 
  -7 -11  -2    0.69    0.79 
  -7 -11  -2   -0.01    0.70 
   7  11   2    0.80    0.79 
   7  11   2    0.61    0.71 
   7  11   2    0.33    0.69 
  -8 -11  -2    2.49    1.15 
  -8 -11  -2    1.68    1.12 
  -8 -11  -2    1.54    1.05 
   8  11   2    1.92    0.94 
   8  11   2    1.71    0.92 
   8  11   2    2.63    1.06 
  -9 -11  -2    7.84    1.81 
  -9 -11  -2    8.25    2.06 
  -9 -11  -2    6.13    1.68 
   9  11   2    7.68    1.80 
   9  11   2    8.67    1.78 
   9  11   2    8.22    1.94 
 -10 -11  -2    0.25    1.10 
 -10 -11  -2    0.20    1.00 
 -10 -11  -2    0.95    0.93 
  10  11   2    1.67    0.99 
  10  11   2    0.89    0.98 
  10  11   2   -0.38    0.57 
   9 -12  -2   -0.77    0.60 
   9 -12  -2   -1.60    0.73 
  -9  12   2    0.37    1.05 
  -9  12   2   -0.30    0.78 
   8 -12  -2    3.78    1.40 
   8 -12  -2    1.11    1.19 
  -8  12   2    3.29    1.36 
  -8  12   2    1.97    1.15 
  -8  12   2    2.43    1.18 
   7 -12  -2    6.60    1.89 
   7 -12  -2    3.70    1.41 
  -7  12   2    2.76    1.12 
  -7  12   2    4.20    1.29 
  -7  12   2    4.79    1.37 
   6 -12  -2   -0.55    0.61 
   6 -12  -2    1.76    1.25 
  -6  12   2    1.43    0.88 
  -6  12   2    0.41    0.69 
  -6  12   2    0.22    0.52 
   5 -12  -2   14.81    2.29 
   5 -12  -2   11.46    2.10 
   5 -12  -2   14.37    2.01 
  -5  12   2   12.95    1.98 
  -5  12   2   14.88    2.20 
  -5  12   2   11.42    1.85 
   4 -12  -2    0.69    0.70 
   4 -12  -2    2.22    1.05 
   4 -12  -2    1.22    0.81 
   4 -12  -2    0.73    0.85 
  -4  12   2    1.86    0.79 
  -4  12   2    1.32    0.74 
  -4  12   2    0.75    0.71 
   3 -12  -2    5.09    0.98 
   3 -12  -2    4.81    1.33 
   3 -12  -2    4.32    1.15 
   3 -12  -2    4.12    1.11 
   3 -12  -2    4.03    1.21 
  -3  12   2    5.44    1.17 
  -3  12   2    2.67    0.92 
  -3  12   2    3.42    0.84 
  -3  12   2    4.10    1.19 
  -3  12   2    4.49    0.96 
   2 -12  -2   26.86    1.94 
   2 -12  -2   21.70    2.52 
   2 -12  -2   21.93    2.32 
   2 -12  -2   23.95    2.48 
   2 -12  -2   24.75    2.64 
   2 -12  -2   19.87    2.14 
  -2  12   2   25.51    1.92 
  -2  12   2   21.70    2.30 
  -2  12   2   20.58    2.27 
  -2  12   2   21.67    1.71 
  -2  12   2   26.20    2.43 
   1 -12  -2    3.22    0.89 
   1 -12  -2    6.53    1.30 
   1 -12  -2    4.55    1.08 
   1 -12  -2    5.54    1.27 
   1 -12  -2    4.26    1.08 
   1 -12  -2    5.13    1.18 
   1 -12  -2    4.26    1.07 
  -1  12   2    5.81    1.17 
  -1  12   2    6.73    1.19 
  -1  12   2    3.44    0.90 
  -1  12   2    7.35    1.26 
  -1  12   2    4.48    1.00 
  -1  12   2    4.42    1.04 
  -1  12   2    6.50    1.16 
   0 -12  -2   23.68    2.35 
   0 -12  -2   24.12    2.49 
   0 -12  -2   24.05    2.52 
   0 -12  -2   27.81    2.11 
   0 -12  -2   20.77    2.32 
   0 -12  -2   32.07    2.85 
   0 -12  -2   26.18    2.37 
   0  12   2   25.43    1.93 
   0  12   2   24.76    2.38 
   0  12   2   22.38    2.27 
   0  12   2   26.25    1.99 
   0  12   2   28.00    2.53 
   0  12   2   24.23    2.32 
   0  12   2   28.14    1.95 
  -1 -12  -2    0.14    0.45 
  -1 -12  -2   -0.04    0.52 
  -1 -12  -2   -0.39    0.46 
  -1 -12  -2    0.20    0.40 
  -1 -12  -2   -0.39    0.40 
  -1 -12  -2   -0.12    0.36 
  -1 -12  -2    0.24    0.47 
   1  12   2    0.23    0.37 
   1  12   2   -0.34    0.41 
   1  12   2    0.50    0.58 
   1  12   2    0.00    0.37 
   1  12   2    0.20    0.52 
  -2 -12  -2   50.58    3.33 
  -2 -12  -2   46.56    2.57 
  -2 -12  -2   39.88    2.93 
  -2 -12  -2   39.50    2.94 
  -2 -12  -2   44.86    2.91 
   2  12   2   47.53    2.49 
   2  12   2   47.23    2.57 
   2  12   2   38.49    2.77 
   2  12   2   41.07    2.72 
   2  12   2   48.97    3.00 
  -3 -12  -2   13.64    2.05 
  -3 -12  -2   12.54    1.83 
  -3 -12  -2   12.45    2.02 
   3  12   2   15.93    1.90 
   3  12   2    8.82    1.58 
   3  12   2   15.38    1.73 
   3  12   2   13.23    1.82 
  -4 -12  -2    0.40    0.65 
  -4 -12  -2    0.94    0.81 
  -4 -12  -2    0.60    0.62 
   4  12   2    1.59    0.72 
   4  12   2    0.42    0.53 
   4  12   2   -0.62    0.29 
  -5 -12  -2   37.05    3.43 
  -5 -12  -2   31.86    3.43 
  -5 -12  -2   29.20    3.27 
   5  12   2   31.86    3.13 
   5  12   2   34.01    3.28 
   5  12   2   31.70    2.43 
  -6 -12  -2   21.57    2.72 
  -6 -12  -2   21.24    2.93 
  -6 -12  -2   25.24    3.06 
   6  12   2   17.85    2.41 
   6  12   2   20.55    2.59 
   6  12   2   20.17    2.41 
  -7 -12  -2    0.99    0.92 
  -7 -12  -2    1.50    1.10 
  -7 -12  -2    0.46    0.80 
   7  12   2    1.59    0.80 
   7  12   2    2.61    1.08 
   7  12   2    1.51    0.79 
  -8 -12  -2    5.77    1.62 
  -8 -12  -2    4.47    1.47 
  -8 -12  -2    3.74    1.49 
   8  12   2    6.52    1.66 
   8  12   2    6.18    1.59 
   8  12   2    8.32    1.71 
  -9 -12  -2   -0.16    0.95 
  -9 -12  -2    1.96    1.10 
  -9 -12  -2   -0.58    0.83 
   9  12   2    0.70    0.92 
   9  12   2    0.98    0.84 
   9  12   2    1.36    0.92 
   8 -13  -2   -0.20    0.62 
   8 -13  -2   -0.60    0.52 
  -8  13   2   -0.09    0.85 
  -8  13   2    0.60    0.74 
  -8  13   2    1.16    0.93 
   7 -13  -2    6.22    1.85 
   7 -13  -2    9.38    2.10 
  -7  13   2    5.28    1.51 
  -7  13   2    5.93    1.51 
  -7  13   2    6.06    1.70 
   6 -13  -2    2.23    1.37 
   6 -13  -2    4.84    1.46 
  -6  13   2    4.43    1.34 
  -6  13   2    1.40    0.86 
  -6  13   2    1.71    0.91 
   5 -13  -2    0.76    0.70 
   5 -13  -2    1.59    0.92 
   5 -13  -2   -0.15    0.79 
  -5  13   2   -0.28    0.45 
  -5  13   2   -0.53    0.66 
  -5  13   2    0.44    0.66 
   4 -13  -2   22.79    2.95 
   4 -13  -2   20.73    2.76 
   4 -13  -2   24.42    2.59 
  -4  13   2   19.19    2.47 
  -4  13   2   26.41    2.98 
  -4  13   2   23.74    2.59 
   3 -13  -2    6.93    1.56 
   3 -13  -2    7.33    1.57 
   3 -13  -2    5.50    1.26 
   3 -13  -2    5.33    1.44 
  -3  13   2    9.28    1.58 
  -3  13   2    6.44    1.38 
  -3  13   2    5.26    1.37 
  -3  13   2    4.27    1.04 
   2 -13  -2    7.14    1.56 
   2 -13  -2    3.78    1.04 
   2 -13  -2    5.76    1.23 
   2 -13  -2    3.81    1.09 
   2 -13  -2    9.05    1.65 
   2 -13  -2    5.73    1.15 
  -2  13   2    6.41    1.16 
  -2  13   2    4.26    1.11 
  -2  13   2    3.36    0.98 
  -2  13   2    5.62    1.26 
  -2  13   2    4.51    1.08 
   1 -13  -2   27.40    2.62 
   1 -13  -2   29.84    2.80 
   1 -13  -2   26.99    2.67 
   1 -13  -2   27.46    2.81 
   1 -13  -2   19.15    2.28 
   1 -13  -2   19.75    2.42 
   1 -13  -2   28.64    2.73 
  -1  13   2   30.95    2.20 
  -1  13   2   25.56    2.39 
  -1  13   2   26.02    2.47 
  -1  13   2   27.50    2.15 
  -1  13   2   28.31    2.57 
  -1  13   2   26.75    2.62 
  -1  13   2   23.53    2.43 
   0 -13  -2    2.91    0.99 
   0 -13  -2    4.11    1.11 
   0 -13  -2    4.17    1.15 
   0 -13  -2    3.85    1.00 
   0 -13  -2    5.71    1.26 
   0 -13  -2    2.83    1.00 
   0 -13  -2    3.67    1.08 
   0  13   2    4.15    1.01 
   0  13   2    3.67    1.04 
   0  13   2    3.44    0.97 
   0  13   2    4.44    1.08 
   0  13   2    4.54    1.06 
   0  13   2    5.58    1.18 
   0  13   2    4.22    1.04 
  -1 -13  -2    5.66    1.15 
  -1 -13  -2    8.96    1.64 
  -1 -13  -2    6.33    1.33 
  -1 -13  -2    4.47    1.19 
  -1 -13  -2    8.58    1.51 
  -1 -13  -2    6.09    1.34 
  -1 -13  -2    8.20    1.38 
   1  13   2    6.96    1.30 
   1  13   2    6.68    1.30 
   1  13   2    8.59    1.34 
   1  13   2    6.00    1.25 
   1  13   2    6.47    1.12 
  -2 -13  -2    1.16    0.75 
  -2 -13  -2    1.43    0.61 
  -2 -13  -2    0.26    0.65 
  -2 -13  -2    0.45    0.65 
  -2 -13  -2    0.30    0.48 
   2  13   2    0.42    0.63 
   2  13   2    0.87    0.52 
   2  13   2    1.13    0.55 
   2  13   2    0.67    0.54 
   2  13   2    0.42    0.46 
  -3 -13  -2   29.22    3.21 
  -3 -13  -2   34.99    3.20
[truncated: 1,397,946 more chars]
